# Supplementary material for: Responses of fungal communities at different soil depths to grazing intensity in a desert steppe
Source: PeerJ journal article supplement (doi:10.7717/peerj.18791), 2025-01-06

# Spearman Correlation Plot

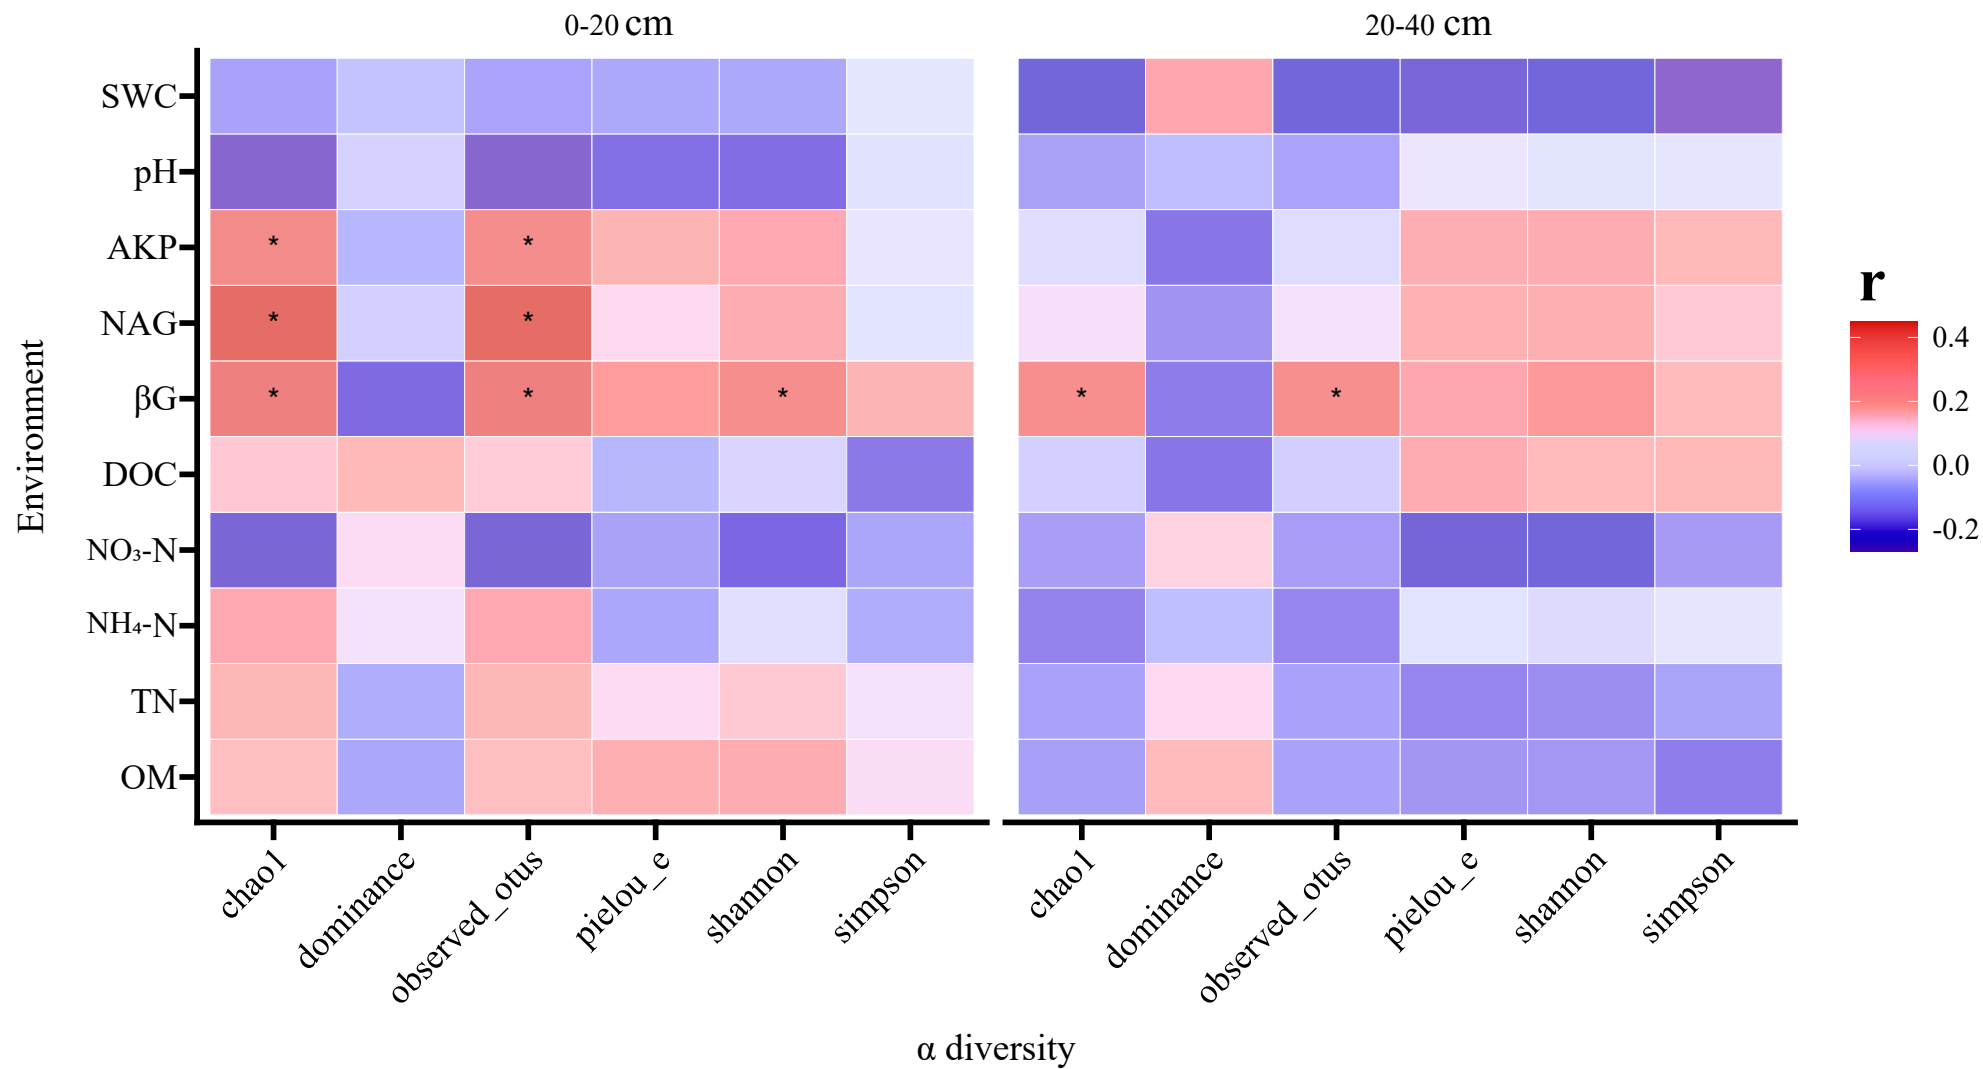

Supplement: Figure_S1.pdf [file Figure_S1.pdf]
