# Supplementary material for: Responses of fungal communities at different soil depths to grazing intensity in a desert steppe
Source: PeerJ. 2025 Jan 6;13:e18791. doi: 10.7717/peerj.18791 (PMC11716020; doi:10.7717/peerj.18791)
Supplement: Supplemental Information 1 [file peerj-13-18791-s001.xlsx]

## Sheet: Sheet1
#OTU ID	CK1.1.1	CK1.1.2	CK1.1.3	CK1.1.4	CK1.1.5	CK1.1.6	CK1.2.1	CK1.2.2	CK1.2.3	CK1.2.4	CK1.2.5	CK1.2.6	LG1.1.1	LG1.1.2	LG1.1.3	LG1.1.4	LG1.1.5	LG1.1.6	LG1.2.1	LG1.2.2	LG1.2.3	LG1.2.4	LG1.2.5	LG1.2.6	MG1.1.1	MG1.1.2	MG1.1.3	MG1.1.4	MG1.1.5	MG1.1.6	MG1.2.1	MG1.2.2	MG1.2.3	MG1.2.4	MG1.2.5	MG1.2.6	HG1.1.1	HG1.1.2	HG1.1.3	HG1.1.4	HG1.1.5	HG1.1.6	HG1.2.1	HG1.2.2	HG1.2.3	HG1.2.4	HG1.2.5	HG1.2.6	OG1.1.1
ASV0	0.0188911	0.0298544	0.0515549	0.048697	0.0289663	0.00568347	0.0244131	0.0180838	0.0566086	0.0379759	0.035554	0.011157	0.0421255	0	0.0535086	0.0407369	0.0604676	0.0663933	0.0228308	0	0.0110279	0.0223141	0.0387994	0.0429812	0.0345852	0.00558659	0	0.0400911	0	0.161301	0.0158717	0.0113508	0.0774857	0.0587238	0.0719637	0.10445	0.0833952	0.0288371	0.0161139	0.0537831	0.0590306	0.0188426	0.0346014	0.140601	0.0243646	0.0419317	0.0873833	0.0191171	0.0256079
ASV1	0.0689767	0.00432719	0.017664	0.065925	0.0242839	0.010382	0.0379436	0.11593	0	0.0662964	0.0207802	0.0572384	0.105871	0	0.00678141	0.00271257	0	0.0204088	0.0548003	0	0.00206672	0.00427875	0	0	0	0	0.0671844	0.00605483	0.00579649	0.0116899	0	0.00229276	0.106743	0.00347144	0	0.0210708	0.00121097	0.00305164	0.013692	0.0100591	6.46e-05	0.00242193	0.00158233	0.000532825	0.0424484	0.00347144	0.000161462	0	0.0332935
ASV2	0.0110763	0.00285788	0.00177608	0.0136597	0.0119159	0.00416573	0.0192463	0.0228469	0.0200213	0.0128524	0.0167113	0.0115445	0	0	0.0132399	0.125585	0.0678787	0.168599	0	0	0.013692	0.095295	0.0644719	0	0.0189395	0.0450964	0.0362644	0	0.0116414	0.00361675	0.0412374	0.0250751	0.0577712	0.0475183	0.0653115	0	0	0	0	0.00794394	0.00266413	0	0	0	0	0.0116737	0	0.0038428	0.0262699
ASV3	0	0.000242193	0.00368134	0.000484387	0.000339071	0.00466626	0.00146931	0.00161462	0.00437563	0.0063939	0.000661995	0.00106565	0.000758872	0.000968773	0.00347144	0.00327768	0.00313237	0.0732393	0	0	0	0.00742726	0.00432719	0.0944069	0.00132399	0.00682985	0.0339394	0	0.0012917	0.000775019	0.0105435	0.00200213	0.00792779	0.0012917	0.000419802	0.00339071	0.145639	0.00256725	0.00569962	0.00393968	0.00548972	0.035554	0.459618	0.0365227	0.0107372	0.00644234	0.00728194	0.0374431	0.00632932
ASV4	0.0147254	0.002761	0.00263183	0.00274486	0.00222818	0.00427875	0.00100107	0.00222818	0.00854135	0.00581264	0.00453709	0.00224433	0.00821843	0.0151936	0.0468563	0.00786321	0.024623	0.0250105	0.173071	0.00959086	0.110876	0.0141925	0.00978461	0.0621307	0.0265767	0.00666839	0.00190525	0.00163077	0.00469855	0	0.0286272	0.0347628	0.00519908	0	0.00158233	0.0331643	0.00445636	0.00644234	0.0314367	0.00240579	0.0211677	0.0783415	0.00645849	0.0113669	0.0463558	0	0.0150806	0.013143	0.0599509
ASV5	0	0	0	0	0	0	0	0	0.109633	0	0	0	0	0.166839	0	0	0.0166629	0	0	0.350002	0	0	0.00997836	0.0254949	0.128088	0.00382665	0	0	0	0	0.023299	0	0	0	0.0756127	0	0	0	0	0	0	0	0	0	0	0	0	0.006846	0
ASV6	0.0299512	0.023412	0.0186166	0.0203765	0.0130946	0.00737882	0.0148222	0.0132076	0.0136758	0.0151936	0.0193593	0.00842833	0.0121258	0.0196177	0.0142087	0.00584493	0.00888042	0.00745955	0.0125456	0.00796009	0.018439	0.01789	0.0111409	0.0129654	0.0103336	0.00458553	0.0258501	0.000710434	0.0284335	0.00539284	0.0278684	0.0161624	0.00476313	0.0162108	0.0129977	0.0396228	0.0201989	0.00637776	0.0111086	0.0469694	0	0.0132076	0.00421416	0.00857364	0.010818	0.00410114	0.0081054	0.0177124	0.0366358
ASV7	0.0110602	0.00114638	0.00240579	0.0164853	0.0179223	0.00444021	0.00188911	0.00337456	0.00324539	0.00379436	0.00718507	0.000920335	0.00159848	0.00243808	0.0111247	0.0519908	0.00636161	0.0739658	0	0.00119482	0.00253496	0.0153228	0.0010818	0.00364905	0.0386218	0	0.00179223	0.0391384	0.0277876	0.0807957	0.0179062	0	0.00230891	0.0265282	0.245503	0.0276423	0.000629703	0.000516679	0.00816999	0.00146931	0	0.00295476	0.000548971	0	0.00187296	0.00109794	0	0.00146931	0.0226693
ASV8	0.00955856	0.0214099	0.0066038	0.0141441	0.00348758	0.00142087	0.0124164	0.0051345	0.0108341	0.00920334	0.00364905	0.00532825	0.0175025	0.00524752	0.0587884	0.0259954	0.0057642	0.00626473	0.00611942	0.00800853	0.0372332	0.0108664	0.00568347	0.00718507	0.011044	0.00770175	0.0306617	0.00603869	0.00477928	0.0279814	0.00536055	0.00978461	0.0202474	0.017002	0.0027933	0.0102044	0.00837989	0.0101883	0.00776633	0.0114961	0.00689444	0.00752414	0.00337456	0.0131915	0.00816999	0.00387509	0.00332612	0.00647463	0.0087351
ASV9	0.00272871	0.000452094	0.000484387	0	0	0	0.00121097	0.00229276	0	0	0	0.000694287	0.0147899	0.00629703	0.00694288	0.0760487	0.0142733	0.0098169	0.00226047	0	0.000548971	0.00888042	0.00240579	0.00216359	0.0153228	0.013805	0.0621145	0.0118352	0.00230891	0.0398812	0.0812316	0.00285788	0.0107049	0.00251881	0.00712048	0.00631317	0.00463397	0.00113024	0.00072658	0.00674912	0.0288533	0.0012917	0.00179223	0.00142087	0.000645849	0.000920335	0.00439177	0.000661995	0
ASV10	0.00339071	0.00337456	0.00217974	0.00661995	0.00377822	0.0113831	0.00100107	0.00167921	0.00469855	0.000678141	0.000775019	0.0012917	0.00435948	0.00511835	0.0322924	0.0118352	0.011044	0.0181161	0.00450479	0.00256725	0.00670068	0.00804082	0.00184067	0.00114638	0.0120289	0.0081054	0.0107695	0.0311784	0.0138535	0.0166952	0.0111893	0.00863823	0.00589337	0.00636161	0.00240579	0.00678141	0.0587077	0.010818	0.0184713	0.00389124	0.0402364	0.0395582	0.00419802	0.00167921	0.00222818	0.0015016	0.00713663	0.0161139	0.0333904
ASV11	0.00248652	0.00145316	0.00322924	0.00558659	0.00132399	0.000661995	0.000888042	0.00206672	0.0103982	0.00595796	0.00185681	0.0030032	0.00330998	0.00650693	0.0208125	0.0509898	0.0363128	0.00868667	0.0176801	0.00526367	0.0209901	0.0237511	0.00766946	0.0123034	0.00986534	0.0296122	0.0526367	0.00752414	0.0368941	0.0114638	0.00414958	0.0227016	0.0298059	0.0307263	0.0145639	0.0059741	0.022411	0.00235735	0.00308393	0.00521523	0.00161462	0.00397197	0.00153389	0.00595796	0.00474699	0.00245422	0.00807311	0.00540898	0.0190525
ASV12	0.00340685	0.00119482	0	0.00389124	0	0	0.0104466	0.00678141	0.000355217	0.00293861	0	0.000177608	0.000888042	0.0255433	0.0356993	0.00691058	0.00539284	0	0.00548972	0.0208932	0.00949398	0.00427875	0.00679756	0	0.00448865	0.00658766	0.0130946	0.0571738	0.00482772	0.0684761	0.00968773	0.00846062	0.0125456	0.0126102	0.00836374	0.019101	0.00146931	0.00889657	0.00284174	0.00741112	0.0032131	0.00815384	0.0010818	0.0182291	0.0362321	0.00731424	0.0136436	0.0189557	0.00791165
ASV13	0.0841057	0.145106	0.00247037	0.00912261	0.0169212	0.00424646	0.214842	0.0410114	0.00143701	0.0019214	0.00424646	0.00221203	0	0	0	0	0	0.000694287	0	0	0	0	0	0.00167921	0	0	0	0	0	0	0	0	0	0	0	0.000242193	0.000193755	0.0536377	0.000242193	0.057642	0.000242193	0.000193755	0.00012917	0.00253496	0.000419802	0.00411729	4.84e-05	0	0
ASV14	0.000290632	0.000209901	0.00201828	0.00620015	0.000274486	0.000226047	0.01634	0.00114638	0.00421416	0.00481157	0.000484387	0.00655536	0.00169535	0.000419802	0.00313237	0.00634546	0.000984919	0.00369748	0.00694288	0.0177931	0.0157264	0.0409307	0.00563503	0.020651	0.000565118	0.00427875	0.00226047	0.00594181	0.000548971	0.000936481	0.00490845	0.0144024	0.0498757	0.0123519	0.0182937	0.00560274	0.0042626	0.000484387	0.0017115	0.000645849	0.00201828	0.00111409	0.0223948	0.0268027	0.0299028	0.0147254	0.0220234	0.00505377	0.0017115
ASV15	0	0	0	0	0	0	0	0.00374592	0	0.00306778	0	0	0.00111409	0	0.028595	0	0	0	0	0	0.0685407	0	0	0	0.0241063	0	0.0229115	0	0.00072658	0.00221203	0.046598	0.00158233	0.0391546	0.00135628	0	0	0.0621952	0.00689444	0	0	0	0.0492783	0.0546711	0.0677657	0	0	0	0.113459	0
ASV16	0	0	0	0	0	0	0	0	0	0	0	0	0	0	0	0	0	0	0	0	0	0	0	0	0	0	0	0	0	0.00127555	0	0	0	0.000274486	0	0.0030032	0.0880776	0.120935	0	0.0974263	0.0976523	0.0995414	0	0.0105435	0	0.0134982	0.0270611	0.0242193	0
ASV17	0	0	0	0	0	0	0	0	0	0	0	0	0.0666677	0.0464365	0	0	0	0	0.0379759	0.0444667	0	0	0	0.056754	0	0	0	0	0	0	0	0	0	0	0	0.00369748	0.0508444	0.0083153	0	0	0	0.0032131	0.0483418	0.0534117	0	0	0	0	0
ASV18	0	0	0.000322924	0.000339071	0.000242193	0.000161462	0.00408499	0.00085575	0.00134014	0.00025834	0.00280944	0.0501017	0.0177931	0.00177608	0.00629703	0.0343269	0.000968773	0.00226047	0.00962315	0.00418187	0.0224271	0.0435302	0.000758872	0.0108341	0.000419802	8.07e-05	0.0128524	0.000710434	0.000177608	0.00754028	0.00389124	0.000419802	0.0541706	0.00163077	0.0038428	0.0133852	0.000177608	0.00132399	0.000968773	0.000435948	0.00148545	0.000322924	0.000226047	0.00796009	0.0113346	0.00185681	0.00450479	0.00179223	0.000984919
ASV19	0.00905803	0.0047147	0.0113024	0.00238964	0.0107857	0.00737882	0.00179223	0.0081054	0.0375723	0.0277069	0.0112216	0.00476313	0.00678141	0.0168728	0.00161462	0.00134014	0.00411729	0.00560274	0.0136597	0.0196984	0.00103336	0.00542513	0.00850906	0.00395582	0.00581264	0.180676	0.00164691	0	0.00484387	0.00085575	0.00628088	0.0112701	0.0010818	0.0010495	0.00339071	0.00163077	0.00203442	0.00166306	0.0048923	0.00235735	0.00159848	0.00211516	0.000807311	0.00106565	0.00600639	0.000936481	0.000613556	0.000839603	0.00571576
ASV20	0.0108018	0.00348758	0.00699131	0.00826686	0.00361675	0.0093971	0.00240579	0.0198437	0.0274163	0.0145962	0.0164853	0.0051345	0.00883198	0.00686214	0.00264798	0.00970388	0.00339071	0.00374592	0.003423	0.00423031	0.00248652	0.00418187	0.00119482	0.0432557	0.00445636	0.00103336	0.00116253	0	0.00201828	0.0072658	0.0128847	0.0457907	0.0070559	0.00892886	0.0175671	0.00613556	0.00518294	0.00285788	0.00364905	0.000661995	0.00242193	0.0168889	0.000645849	0.0125618	0.0152905	0.00894501	0.00119482	0.0274809	0.0107534
ASV21	0	0	0	0	0	0	0	0	0	0.00025834	0	0	0.00371363	0	1.61e-05	0	0.000209901	0	0	0	8.07e-05	0	0.000371363	0.000419802	0.000145316	0	0	0	0	0.000161462	0	3.23e-05	0.000371363	0.000742726	0	0.000613556	0.000710434	0.0470824	0.205428	0.00387509	0.0318242	0.00988149	0.000742726	0.00479543	0.0392192	0.0719476	0.0102367	0.003423	0.00871896
ASV22	0	0	0	0	0.0996868	0.236284	0	0.00121097	0.00175994	0.00085575	0.0290471	0.0100752	0.0637291	0.0115284	0.00263183	0.000290632	0.000209901	0	0.00720121	0.000888042	0.0010495	0.000242193	0.000226047	0	0.00174379	0.000177608	6.46e-05	0.0177285	0	0	0	0	0	0.000629703	0	0	0	0	0	0	0	0	0	0	0	0	0	0	0
ASV23	0.000645849	0.00456938	0.000290632	0.000193755	0.00122711	0.000645849	0.00550586	0.000871896	0.000403656	0.00153389	0.00200213	0	0.000113024	0.000371363	0.00025834	0	0.00540898	0.000226047	0	0	0.000113024	0	0.00253496	0	0.000161462	0.000306778	0.000435948	0	0.000839603	0.000209901	0.000322924	0.00594181	0.000306778	0.00442406	0.000226047	0.000871896	0.0044725	0.00177608	0.000888042	0.00111409	0.0010818	0.00437563	0.00182452	0.00381051	0.00124326	0.347644	0.00046824	0.000452094	0.022524
ASV24	0.00116253	0.00340685	0.00135628	0.0072658	0.00295476	0.00196984	0.0164369	0.00484387	0.00608712	0.0100752	0.00547357	0.0711564	0.00085575	0.00025834	0.00224433	0.00153389	0.000710434	0.00166306	0.00184067	0.000758872	0.0183744	0.00256725	0.00025834	0.00261569	0.0010495	0.00114638	0	0.00946168	0.000613556	0.000419802	0.00569962	0.00550586	0.000678141	0.00933251	0.0144509	0.00418187	0.00350373	0.0047147	0.00117867	0.000387509	0.000968773	0.00174379	0.00305164	0.0324055	0.00590952	0.00111409	0.000888042	0.0100591	0.0115445
ASV25	0.00350373	0.000226047	0.000403656	0.00371363	0.000936481	0.000758872	0.00942939	0.0199244	0.00390739	0.0081377	0.00584493	0.00389124	0.000484387	0.000290632	0.00148545	0.000371363	0.00046824	0.00025834	0.000161462	0.00671683	0.0104305	0.00174379	0.000516679	0.00203442	9.69e-05	0.000274486	0.000242193	0.000145316	9.69e-05	0.000371363	0.00629703	0.0029709	0.00518294	0.0032131	0.00503762	0.00579649	0.000888042	0.00172765	0.000807311	0.00121097	0.0010495	0.000888042	0.00503762	0.0559467	0.00571576	0.00728194	0.0135467	0.0155165	0.00469855
ASV26	0.000145316	0.000145316	0.0240902	4.84e-05	0	0	9.69e-05	0	0.00272871	6.46e-05	0	0	0.00411729	0	0.000888042	0.000355217	0.0343753	0	0.000516679	0.000145316	0.00046824	0.00059741	0	0	0.000403656	0.00012917	0.00127555	0.0266413	0.0017115	0	0.000290632	0.000516679	0.00389124	0.00175994	0	0	0.0151129	0.00169535	0.00046824	0.00734653	0.000904188	0	0.0010495	0.000242193	0.000290632	0.000532825	0.000565118	0.00153389	0.00143701
ASV27	0.00143701	0	0	0.013918	0	0.00506991	0.00439177	0.00151775	0	0.00185681	0	0.00652307	0.00910647	0.00155004	0	0	0.0135305	0	0.0049246	0.00138857	0.00524752	0	0.0012594	0.00723351	0	0.00607098	0.0461782	0.029709	0.0141602	0	0	0.00292247	0.00988149	0.00558659	0.0145639	0	0.013918	0.0108826	0.00418187	0.00563503	0	0.00954242	0.00904188	0.00361675	0.0129008	0.0010495	0	0.0108826	0.00652307
ASV28	0.00242193	0.000403656	0.00750799	0.00138857	0.00366519	0.00138857	0	0.00389124	0.00318081	0.000936481	0.00226047	0	0.00303549	0.00322924	0.0300966	0.0144509	0.00295476	0.00269642	0	0.00140472	0.0124326	0.00460167	0	0	0.00941325	0.00301934	0.00151775	0.0174056	0.0372816	0.00708819	0.00319695	0.00238964	0.000936481	0.00408499	0.00240579	0.00272871	0.00599025	0.00413343	0.00456938	0.0184067	0.01148	0.00710434	0.000500533	0.00274486	0.00101721	0.00303549	0.0113346	0.00435948	0.00127555
ASV29	0.00537669	0.0166145	0.0164046	0.00159848	0.00881584	0.00649078	0.00755643	0.00566732	0.00353602	0.00121097	0.00523137	0.00340685	0.000613556	0.000968773	0.0112701	0.00665224	0.0127878	0.0141118	9.69e-05	0.000193755	0.00250266	0.00274486	0.000758872	0.0147092	0.000500533	0.00179223	0.00119482	0.015678	0.025947	0.023299	0.000387509	0.00100107	0.00085575	0.00172765	0.00163077	0.00435948	0.00180838	0.0173249	0.00287403	0.0118029	0.000904188	0.0222656	0.0010495	0.00385895	0.000613556	0.00142087	0.00155004	0.0107211	0.0201828
ASV30	0.00245422	0.000209901	0.00671683	0.000339071	0.00926793	0.00200213	0.000290632	0.000613556	0.00203442	0.0010495	0.00381051	0.00345529	0	0.00676527	0.000661995	0	0.000371363	0	0	6.46e-05	4.84e-05	0	0.00124326	0.00269642	0.00358446	0.227	0.00587722	0.000694287	0.00332612	0.0010818	0.000387509	0.0524429	0.00188911	0.00196984	0.000113024	0	0	0.000209901	0.000419802	0.000952627	0.000339071	0	0	0.00206672	0.00458553	0.00138857	0	0.00012917	4.84e-05
ASV31	0.0225401	0.0110602	0.0169535	0.0195531	0.0166306	0.00837989	0.0126102	0.0124649	0.00765331	0.00731424	0.0188749	0.0083153	0.00518294	0.00353602	0.00511835	0.0025834	0.00319695	0.00219589	0.000968773	0.0017115	0.00411729	0.00111409	0.00113024	0.000968773	0.0057642	0.00175994	0.00167921	0.0772435	0.0012594	0.00350373	0.00195369	0.00245422	0.00424646	0.00758872	0.000500533	0.00264798	0.000371363	0.000936481	0.00100107	0.000661995	0.000871896	0.00151775	0.000645849	0.00132399	0.00214745	0.00313237	0.00111409	0.00620015	0.000823457
ASV32	0.000888042	0.000807311	0	0.000710434	0.00242193	0.000548971	0.00106565	0.00134014	0.00140472	0.00155004	0	0.000694287	0	0.00130784	0.00180838	0.00100107	0.000452094	0.00209901	0.000484387	0.000226047	0.00221203	0.00153389	0.000775019	0.00185681	0	0.000161462	4.84e-05	0.000339071	0.000823457	0.00298705	0.00158233	0	0.000371363	0.000500533	0.000371363	0.00200213	0.00335841	0.0538799	0.00418187	0.00142087	0.00198599	0.00900959	0.00332612	0.00389124	0.00339071	0.00155004	0.00484387	0.00645849	0.00589337
ASV33	0.0114638	0.0281429	0.000984919	0.0434495	0.00282559	0.00121097	0.0101721	0.0140311	0.00403655	0.00944554	0.003423	0.000581264	0.00506991	0.0163561	0.00712048	0.00594181	0.0115284	0.000419802	0.00161462	0.00539284	0.00737882	0.0126425	0.00318081	0.00100107	0.00372978	0.00661995	0.00452094	0.01634	0.0230245	0.000581264	0.00414958	0.0104628	0.00392353	0.00237349	0.000516679	0.000775019	0.00103336	0.000516679	0	0.00151775	0.00122711	0.00145316	0.000758872	0.00134014	0.000452094	0.0015016	0.000936481	0.00232506	0.00868667
ASV34	0	0.000435948	0.00025834	0.00196984	0.0110925	0.0135951	0.000694287	0.000387509	0.00163077	0.00116253	0.00385895	0.000548971	0	0.00130784	0.00397197	0	0.000613556	0	0	0.000145316	0.0185359	0	0.000242193	0.000161462	0	4.84e-05	0.000113024	0	0.00881584	0.00059741	0	0.00238964	0	0	0.00187296	0.000791165	0	0.000371363	0.00647463	0	0	0.000500533	0	0.00781477	0.00364905	0.000355217	0	0.0032131	0.000742726
ASV35	0	8.07e-05	0	0.00134014	0	0.00274486	0	0	0	0	0	0.000290632	0.00427875	0.0496819	0.00238964	0.056867	0.0087674	0.0119321	0.00353602	0.0147576	0.000936481	0.0308716	0.0038428	0.0168567	0.000888042	0.000952627	0.000387509	0.00142087	0.0764846	0	0	0	0.00111409	0	0.00458553	0	0	0	0.0148222	0	0	0.000823457	0	0	0.00256725	0	0	0.000435948	0.00298705
ASV36	0.0027933	0.00992992	0.00159848	0.00392353	0.00568347	0.00613556	0.00411729	0.0185682	0.00389124	0.011157	0.00797623	0.0173733	0.00206672	0.00121097	0.00439177	0.00101721	0.00130784	0.0010818	0.0277231	0.00142087	0.00942939	0.0042626	0.0261569	0.00434333	0.00227662	0.000904188	0.000371363	0.000387509	0.000936481	0.00143701	0.00085575	0.00175994	0.00198599	0.00387509	0.00411729	0.00682985	0.000952627	0.00432719	0.00311622	0.000613556	0.0139503	0.0119321	0.00707204	0.00805696	0.0333097	0.00295476	0.00477928	0.00892886	0.00179223
ASV37	0	0	0	0	0	0.000274486	0	0	0.00429489	0.000209901	0	0.00143701	0.000322924	0	0.000274486	0	0	9.69e-05	6.46e-05	0	0.000193755	0.00214745	4.84e-05	0	0.00397197	0	0	0	0	0	0.00012917	0.00025834	0	0.00134014	0	0.00140472	0.00059741	0.0881261	0.00298705	0.000742726	0.00072658	0.00146931	0.000435948	0.00402041	0.000920335	0.0030032	0.00733038	0.030032	0.00138857
ASV38	0.0025834	0.00754028	0.00578035	0.00676527	0.00205057	0.00187296	0.00899344	0.00221203	0.00164691	0.00381051	0.00366519	0.00222818	0.0129493	0.00219589	0.0159363	0.00292247	0.00652307	0	0.00889657	0.000355217	0.00521523	0.00350373	0.0010818	0.00248652	0.00337456	0.00145316	0.0291116	0.00226047	0.0137081	0.00766946	0.000952627	0.00305164	0.00382665	0.000807311	0.00121097	0.00250266	0.032131	0.0083476	0.00319695	0.00256725	0.0110602	0.00435948	0.00117867	0.00269642	0.0021313	0.00130784	0.00544128	0.00324539	0.0057642
ASV39	0	0	0	0	0	0	0	0	0	0	0	0	0.0120128	0.00166306	0.0023412	0.00106565	0.00156618	0.000613556	0.251364	0.00114638	0.00153389	0.00145316	0.0010818	0	0.000274486	0	0	0	0	0	0	0	0	4.84e-05	0.000113024	0	0	0	0	0	0	0	0	0	0	0	0	0	0.00100107
ASV40	0.0182937	0.000613556	0	0	0.0633093	0.0206833	0.000613556	0.00479543	0.00190525	0.00143701	0.0570123	0.00324539	0.000403656	0	0	0	0	0	0	0	0	0.00106565	0	0	0.00429489	0.000581264	0	0.00665224	0	0	0.0146931	0.00151775	0	0.0051345	0	0	0.000613556	0.000532825	0.0386863	0.000403656	0	0.00180838	0.000775019	0.000661995	0.021975	0.00153389	0	0.0012917	0.00121097
ASV41	0.00335841	0.00444021	0.00135628	0.00285788	0.00256725	0.00382665	0.00253496	0.00636161	0.00392353	0.00641005	0.0135628	0.00463397	0.00214745	0.0107049	0.00450479	0.00332612	0.00553815	0.00610327	0.0251074	0.00754028	0.0025834	0.0108341	0.00205057	0.00506991	0.00175994	0.00442406	9.69e-05	0.00163077	0.000791165	0.000936481	0.00629703	0.0219104	0.000742726	0.00707204	0.000936481	0.00805696	0.00226047	0.0010818	0.00589337	0.00119482	0.00339071	0.00289017	0.000952627	0.00305164	0.00770175	0.00167921	0.000452094	0.00201828	0.0321794
ASV42	0.000387509	0.0196822	0.0686053	0.00242193	0.000871896	0.0010818	0.0650854	0.00113024	0.135031	0.0135951	0.00132399	0.000710434	0	0	0	0	0	0	0	0	0	0	0	0	0	0	0	0	0	0	0	0	0	0	0	0	0	0	0	0	0	0	0	0	0	0	0	0	0
ASV43	0	0	0	0	0	0	0	0	0	0	0	0	0	0	0	0	0	0	0	0	0	0	0	0	0	0	0	0.0238803	0	0	0	0	0	0	0	0	0	0	0.0556237	0	0	0	0	0	0.182162	0	0	0	0
ASV44	0	0	0	0	0	0	0	0	0	0	0	0	0	0.0511028	0	0	0	0	0	0.0227662	0	0	0	0	0	0	0.154422	0	0.0506184	0	0	0	0	0	0	0	0	0	0	0	0	0	0	0	0	0	0	0	0
ASV45	0.00132399	0.000274486	0.00101721	0.00122711	0.00158233	0.00397197	0.00915491	0.00907418	0.00364905	0.00134014	0.00368134	0.0184874	0.014467	0	0.00193755	0	0.00190525	0	0.00263183	0	0.00172765	0	0.00085575	0	0.00198599	0	0.0151936	0.0150967	0.00208286	0.0221365	0.0108664	0.000581264	0.0174056	0.00587722	0.0160655	0.00565118	0	0.00187296	0.00211516	0.00368134	0.000355217	0.00226047	0.014241	0.00469855	0.0128201	0.00268027	0.0110763	0.0195208	0
ASV46	0	0	0	0	0	0	0	0	0	0	0	0	0.00180838	0.0012594	0.00185681	0.00169535	0.00227662	0.000775019	0.000613556	0.000823457	0.000888042	0.00253496	0.274744	0	0	0	0	0	0	0	0	0	0	0	0	0	0	0	0	0	0	0	0	0	0	0	0	0	0
ASV47	0	4.84e-05	0	0	0	0	0	0	0	0	0.00253496	0	0.0429167	0.0353764	0.00134014	0.00166306	0.0415119	0.0130139	0.0164046	0.057755	0.000984919	0.00106565	0.0424807	0.00214745	0.00085575	0.000403656	0	0	0.00085575	0	0	0.00113024	0	0	0	0	0	0	0	0	0	0	0	4.84e-05	0	0	0	0	0
ASV48	0.00311622	0.0287564	0.00164691	0.00416573	0.00274486	0.0171473	0.0053444	0.019763	0.00242193	0.0201828	0.00169535	0.00599025	0.00256725	0.00163077	0.0025834	0.00250266	0.000968773	0.000548971	0.00085575	0.000694287	0.00671683	0.00938095	0.000871896	0.0126263	0.00366519	0.00100107	0.000629703	0.000177608	0.00109794	0.00177608	0.00547357	0.00164691	0.00306778	0.00289017	0.00025834	0.00398812	0.00109794	0.00277715	0.00248652	0.000984919	0.00406885	0.00313237	0.00180838	0.00190525	0.00316466	0.000532825	0.000403656	0.00221203	0.00282559
ASV49	0.0025834	0.00569962	0.000484387	0.00337456	0.000839603	0.0042626	0.00303549	0.00277715	0.00206672	0.00353602	0.00161462	0.00340685	0.00205057	0.00356831	0.00161462	0.00387509	0.00490845	0.000984919	0.00193755	0.0010495	0.00736268	0.00791165	0.00221203	0.00410114	0.00295476	0.000371363	0.000242193	0.00103336	0.000403656	0.00142087	0.0166145	0.00531211	0.00122711	0.00641005	0.00116253	0.0119966	0.00266413	0.0032131	0.0109794	0.000629703	0.00516679	0.00649078	0.00205057	0.00666839	0.00968773	0.00242193	0.00505377	0.00786321	0.0152259
ASV50	0.0161462	0.000565118	0.0471631	0.00046824	0.000274486	0.0244938	0.00012917	0.0117867	0.01303	0	0.000548971	0.0152097	0.00364905	0.000209901	0.000484387	0.000968773	0	0.000145316	0.00206672	0	0.000775019	0.00229276	0	0.000226047	0	0.000871896	0.000226047	0.000226047	0	0.00303549	0	0	0.0010818	0	0	0.00025834	0.000694287	0.000193755	0.00272871	0.00453709	0.0135951	0.00431104	0	0.000403656	0.00476313	0.000113024	0.00463397	0	0.00156618
ASV51	0	0	0.00142087	0.0636323	0	0.0015016	0	0.00117867	0	0.0203604	0.00122711	0.00392353	0.00280944	0.00116253	0.00230891	0.00652307	0.000339071	0	0.00145316	0.000629703	0	0.000839603	0.000177608	0	0.00146931	0.000742726	0.0658927	0	0.00180838	0	0	0.000678141	0.0175348	0	0	0	0	0	0.00238964	0	0	0.00119482	0	0	0	0	0	0	0.0121581
ASV52	0.000339071	0.000387509	0	0.000161462	0	0	0	0.00196984	0.000742726	0	0.00012917	0.000419802	0.00301934	0.00127555	0.00429489	0.00413343	0.00752414	0.00695902	0.0012594	0	0.00222818	0.00251881	0.00237349	0.00200213	0.00269642	0.00527981	0.0072658	0.00059741	0.00277715	0.00366519	0.00479543	0.0115445	0.0114154	0.000952627	0.0610004	0.00208286	0.00934866	0.00229276	0.00142087	0.00272871	0.00602254	0.0137243	0.000742726	0.00402041	0.00113024	0.00295476	0.00235735	0.00432719	0.00230891
ASV53	0.000500533	0	0.000419802	0.00211516	0.000952627	0.000742726	0.0038428	0.00902574	0.00494074	0.0228792	0.00377822	0.0116091	0.000161462	0.000209901	0.000306778	0.000113024	0	0	0.00298705	0.00337456	0.00377822	0.00248652	0.000290632	0.000516679	0	0	0	0	0	0.000403656	0.00469855	0.00240579	0.00490845	0.00217974	0.0108503	0.00850906	0.000500533	0.000565118	0.000242193	0	0.000904188	0.00046824	0.00736268	0.0187296	0.00337456	0.00196984	0.00479543	0.00332612	0.00046824
ASV54	0.00695902	0.00339071	0.00158233	0.00226047	0.00374592	0.00563503	0.0064262	0.00196984	0.00360061	0.00506991	0.00749185	0.00424646	0.000775019	0.00340685	0.00182452	0.000888042	0.0158556	0.00214745	0.00059741	0.00166306	0.00857364	0.00138857	0.00224433	0.00214745	0.0010495	0.000613556	0	0.000242193	0.00072658	0.00266413	0.00172765	0.00655536	0.00697517	0.00573191	0.0144509	0.00319695	0.00159848	0.00242193	0.0012594	0.000758872	0	0.0040527	0.000516679	0.00718507	0.0131592	0.00745955	0.0093971	0.00158233	0.00224433
ASV55	0.00106565	0	0	0	0	0	0	0.000581264	0	0.000355217	0	0	0.000532825	0.00256725	0.00072658	0	0.00230891	0.00787935	0	0	0	0	0	0.000791165	0.000807311	0.0650047	0.00997836	0	0	0.00059741	0	0.0130461	0.00313237	0	0	0	0	0.030258	0.00106565	0	0.0068137	0	0	0.00523137	0.000435948	0	0.00455323	0	0
ASV56	0	0.00355217	0	0	0.00427875	0	0	0	0.00155004	0	0.0180515	0	0	0	0.0194239	0.0126102	0	0.0140956	0	0	0	0.00458553	0	0	0.0141764	0	0	0	0	0.0232667	0.00613556	0	0	0	0	0.0057642	0	0	0	0	0.00466626	0	0	0	0	0	0.00327768	0	0
ASV57	0.00235735	0.0185682	0.00113024	0.00143701	0.000209901	0.000645849	0.0023412	0.00527981	0.00187296	0.00256725	0.0010495	0.00175994	0.00542513	0.00466626	0.00907418	0.00117867	0.00516679	0	0.000758872	0.00221203	0.0081377	0.00744341	0.00486001	0.00113024	0.0123196	0.000484387	0.000435948	0.000968773	0.000775019	0.00326154	0.00237349	0.00427875	0.000387509	0.00710434	0	0.0108018	0.00174379	0.0116737	0.00272871	0.000371363	0.000823457	0.000775019	0.0010818	0.0139503	0.000532825	0.000920335	0.00208286	0.00506991	0.0275293
ASV58	4.84e-05	0.00012917	0.00190525	0	0.000209901	0.000419802	0	0.000193755	0.000419802	0.000226047	6.46e-05	0.00737882	0.000177608	0.00250266	0.000355217	0	0.0120774	0	4.84e-05	8.07e-05	0	9.69e-05	0.000613556	0.0015016	0.0012917	0.0735137	0.00114638	0.000645849	0.00229276	0.00153389	0.000452094	0.10198	0.00185681	0.0012917	6.46e-05	0	0	0	0	0	0	0	0	0.00237349	0	0	0	0	0
ASV59	0	0	0	0	0	0	0	8.07e-05	0	0.00122711	0	0	6.46e-05	6.46e-05	0.00574805	0.000145316	0	0.0104628	0	0.000113024	0.00435948	6.46e-05	0	0.000775019	0.000290632	0.000193755	0.0237511	0.00702361	0	0.00122711	0.000532825	0.00284174	0.0222495	0.000694287	0.000645849	0.00085575	0.0131915	0.00130784	0	0.000516679	0.000274486	0	0.00274486	0.000968773	0.000694287	0.000355217	0.000871896	0.00109794	0.00172765
ASV60	0.000791165	0.000419802	0.00527981	0.0196177	0.00337456	0.0472438	0.00253496	0.00716892	0.00122711	0.0104789	0.00251881	0.00187296	0.000888042	0.000452094	0.000193755	0	0.0066361	0.00134014	0.000500533	0.000306778	0	0.000145316	0.00214745	0.00184067	0.00397197	8.07e-05	0.0012594	0.000823457	0.000387509	0.000775019	0.006846	0.000290632	0.0025511	0.00284174	0.00012917	0.00100107	0.00406885	0.00163077	0.00205057	0.000532825	6.46e-05	0.00143701	0.000661995	0.00243808	0.00232506	0.000226047	0.00012917	0.00109794	0.00046824
ASV61	0.0010818	0.0100591	0.00211516	0.00402041	0.00653922	0.00340685	0.00272871	0.0025834	0.00374592	0.00208286	0.00293861	0.00158233	0.00289017	0.00274486	0.00305164	0.00217974	0.00905803	0.00311622	0.000371363	0.00222818	0.000645849	0.0010495	0.00414958	0.00142087	0.00930022	0.0124164	0.0103497	0.00418187	0.00185681	0	0.00124326	0.00416573	0.0133852	0.00166306	0.00687829	0.0068137	0.000113024	0.00414958	0.0081377	0.0010495	0.000645849	0.00121097	0.000209901	0.00137243	0.00187296	0.0027933	0.000791165	0.000758872	0.000322924
ASV62	0.00046824	0.00925178	0.00059741	0.0623567	0.0157749	0.000565118	0.00721736	0.00474699	0.000920335	0.0346014	0.0295314	0.000694287	0.000209901	0.000145316	0.00368134	0.00581264	0.000177608	0	0.000113024	9.69e-05	0.00196984	0.000371363	0	0	0	0	9.69e-05	0	0	0.000113024	0.00318081	0	0.000193755	0	0	0.000419802	0.000532825	0	0	0	0	0	0.00072658	4.84e-05	0	0	0	0.000775019	0.0144509
ASV63	0	0	0	0	0	0.00203442	0	0.000371363	0	0.000742726	0	0.00143701	0.000452094	0.000936481	0.00203442	0.000952627	0.00122711	0.0085252	0	0.000516679	0.0049246	0.0251235	0.00025834	0.00187296	0.000484387	0	0.000452094	0.0173572	0.00923564	0.00046824	0.00274486	0.000274486	0.000274486	0.0161785	0.000403656	0.00100107	0	0.00221203	0.0165822	0.00552201	0.00613556	0.00460167	0.00101721	0.00536055	0.002761	0.0123357	0.00965544	0.000904188	0
ASV64	0	0	0	0	0	0.00306778	0	0	0	0	0	0.0103336	0	0	0	0	0	0	0	0	0	0	0	0	0	0	0	0	0	0	0	0	0	0	0	0.00668454	0	0	0	0.0346659	0.0486647	0	0	0	0	0.0273356	0.055543	0	0.0105112
ASV65	0.000532825	0.000516679	0.000161462	0.0081377	0.00248652	0.00214745	0.00085575	0.000355217	0	0.00206672	0.00145316	0.000516679	0.00159848	0.00117867	0.000403656	0	0.000791165	0.000226047	0.00208286	0.00072658	0.00025834	0.000403656	0	0	0.00350373	0	0.00440792	0.0482933	0.00303549	0.00965544	0.00392353	0.000984919	0.00138857	0.00450479	0.000500533	0.00351988	0.00334227	0.00340685	0.00510221	0.00455323	0.00923564	0.00453709	0.00179223	0.00117867	0.000500533	0.00177608	0.00243808	0.00272871	0.00537669
ASV66	0.0010495	0	0.00198599	0.00253496	0.00332612	0.000694287	0.00292247	0.0126425	0.00634546	0.00343914	0.00921949	0.0156134	0	0	0.0108018	0.00109794	0.000339071	0.000904188	0	0	0.00888042	0.000791165	0	0.00119482	0.000968773	0.000678141	0.0164369	0.00182452	0	0	0	0.00148545	0.014354	0.000839603	0.00116253	0.00201828	0	0.00193755	0	0.000807311	0	0	0	0.000952627	0.00503762	0.00175994	0.00308393	0.00135628	0
ASV67	0.00245422	0.00195369	0.0157749	0.0182129	0.00243808	0.0081054	0.00135628	0.00085575	0.00808926	0.0487777	0.00303549	0.0107049	0.00100107	0.00113024	0.00137243	0.000920335	0	0	0.00072658	0.000661995	0.000758872	0	0.0756612	0	0	0	0	0.000532825	0	0.000435948	0	0	0	0	0	0.000500533	0	0	0	0	0	0	0	0	0	0	0	0	0
ASV68	0.159525	0.00085575	0.000920335	0.000920335	0	0.000226047	0	0.0399135	0	0	0.000161462	0	0	0	0	0	0	0	0	0	0	0	0	0	0	0	0	0	0	0	0	0	0	0	0	0	0	0	0	0	0	0	0	0	0	0	0	0	0
ASV69	0.159105	0.00101721	0.000984919	0.000871896	0.000306778	0	0.000193755	0.039203	0	0.000322924	0.000306778	0	0	0	0	0	0	0	0	0	0	0	0	0	0	0	0	0	0	0	0	0	0	0	0	0	0	0	0	0	0	0	0	0	0	0	0	0	0
ASV70	0	0.0108987	0	0.0129654	0	0	0	0.0101721	0.00272871	0.00778248	0	0.00657151	0.00137243	0.00340685	0	0	0.00174379	0.00205057	0.00269642	0.00140472	0.00724965	0.00620015	0	0.00271257	0.00752414	0	0.000242193	0	0	0	0.00463397	0	0.00103336	0	0.000500533	0.00883198	0	0	0.00800853	0	0.00324539	0.00277715	0.000968773	0.0019214	0	0	0.0142087	0.00423031	0.0126909
ASV71	0.00187296	0.00402041	0.0101721	0.0418187	0.000371363	0.000274486	0.00137243	0.00109794	0.00784706	0.0167436	0.000419802	0.000339071	0.00143701	0.00765331	0.00172765	0.000742726	0.014241	0.000775019	0.000613556	0.0143378	0.000742726	0.000661995	0.00387509	0.000581264	0.000775019	0.000419802	0.00615171	0	0.000968773	4.84e-05	0.000161462	0.000177608	0.00444021	0.000355217	0	0.00046824	0.00012917	0.000226047	0.000532825	0.000306778	0.00164691	0.000177608	0.000161462	0.000242193	0.00109794	0.000161462	0.0032131	0.000209901	0.000177608
ASV72	0.00280944	0.00167921	0.00177608	0.00227662	0.00153389	0	0.00219589	0.00250266	0.00272871	0.000807311	0.00072658	0	0.00410114	0.00345529	0.00620015	0.00494074	0.00733038	0.00324539	0.00122711	0.00121097	0.0023412	0.0030032	0.00205057	0.00277715	0.00448865	0.00219589	0.00188911	0.00403655	0.00466626	0.00319695	0.00319695	0.00308393	0	0.0038428	0.000290632	0.00282559	0.00266413	0.00201828	0.00142087	0.00172765	0.00481157	0.00332612	0.00343914	0.00311622	0.00484387	0.00413343	0.00381051	0.00261569	0.00266413
ASV73	0	0.00148545	0	0	0	0.000678141	0.0154035	0	0.00465011	0.00581264	0	0.0047147	0	0.00135628	0	0.000290632	0	4.84e-05	0.0212	0	0	0	0	0.000403656	0	4.84e-05	0	0	0	0.000904188	0.000516679	0	0.000678141	0.000387509	0	0	0	0.00172765	0	0.00229276	0	0.00111409	0.00158233	0.000274486	0.00836374	0.0025511	0.000193755	0	0.000678141
ASV74	0.00216359	0.000339071	0.0010818	0	0.00111409	0.000177608	0.00251881	0.00113024	0.00193755	0	0.000742726	0.000694287	0	0.00329383	0.0118998	0.00645849	0	0.0390739	0	0	0.00174379	0.00113024	0	0.00100107	0	0.00177608	0.000839603	0	0.00418187	0	9.69e-05	0.00177608	0	0	0.00187296	0.000419802	0.00134014	0.0206349	0	0.00146931	0.00350373	0.00142087	0.000419802	0.000952627	0	0.00140472	0.00155004	0.00418187	0.0387186
ASV75	0.000113024	0	0.000839603	0.00326154	0	0.000984919	0	0	0.0010495	0.00179223	0.000322924	0	0	0	0	0.00516679	0.00117867	0	0	0	0	0.006846	0.000888042	0	0.00205057	0.0019214	0.00245422	0.00174379	0.00863823	0.000839603	0.00366519	0.00661995	0.00590952	0.00072658	0	0.00072658	0.00109794	0.0662156	0.000775019	0.0012917	0.00242193	0.00413343	0.000678141	0.00272871	0.00085575	0.000823457	0.00200213	0	0.00776633
ASV76	0	0	0	0	0	0	0	0	0	0.00151775	0.000145316	0	0.000645849	0.000984919	0.00190525	0.000161462	0.000209901	0	0.000888042	0	0.000839603	0	0.00012917	0.00012917	0.000371363	0.00673297	0.000209901	0.00406885	0	0	0	0.00377822	0	0	0	0.00227662	0.000484387	0.0436917	0.00303549	0.000548971	0	0.00697517	0.00046824	0.0234443	0.00343914	0.000807311	0	0.0400265	0.00046824
ASV77	0	0.0012917	0	0	0	0.00012917	0	0	0	0	0	0	0	0	0	0	0	0	0	0	0	0	0	0	0	0	0	0	0	0	0	0	0	0	0	0	0	0.00393968	0	0	0.00636161	0	0	0.000242193	0	0	0.000904188	0.000548971	0.000645849
ASV78	0.00046824	0.000322924	0	0.0479058	0.00245422	0.00946168	0.000322924	0.0221042	0.00046824	0.000387509	0.000403656	0.000613556	0	0	0	0	0	0	0	0.000113024	8.07e-05	6.46e-05	1.61e-05	0	0	0	0	0.0589014	0	0	0	0	0	0	0	0.000209901	0.00103336	0.000403656	0.000339071	4.84e-05	0	0	0.000419802	0	0	0	0	0.000209901	0.000177608
ASV79	0.000290632	0	0.000177608	0	0	0	0.023299	0.0188588	0.000984919	0.000888042	0.000339071	0.00059741	0	0	4.84e-05	0	0.000904188	6.46e-05	0.000548971	0.000355217	0	0	0.000339071	0.00410114	0	0	0.00012917	0	0	0.00025834	0.000274486	0	0.0200698	0.0465657	0.000871896	0.00164691	0	4.84e-05	0	0.000645849	0	0.000435948	0.00177608	0.00308393	0.000758872	0.0167275	0.00397197	0.000984919	0.00012917
ASV80	0	0.000290632	0	0	0	0.00290632	0.00012917	0.000290632	0	0	0	0.00159848	0	0	0.00127555	0.00217974	0.00059741	0.00755643	0	0	0	0.00185681	0.00025834	0.000823457	0.000565118	0.0188426	0.00272871	0.00539284	0	0.0104789	0.000177608	0.00324539	0.000952627	0.0072658	0	0.00322924	0.000661995	0.000403656	0.00247037	0.0261246	0.00469855	0.012142	0.000209901	0	0.00143701	0.00250266	0.00387509	0.0193432	0.000177608
ASV81	0.0012594	0.00072658	0.000322924	0.00437563	0.000710434	0.00012917	0.000694287	0.00153389	0.000371363	0.00137243	0.00072658	0.00127555	0.00132399	0.00263183	0.00116253	0.00224433	0.00196984	0.000339071	0.000807311	0.000839603	0.00495689	0.0224271	0.00111409	0.000226047	0.00174379	0.000209901	4.84e-05	0.000242193	0.000290632	0.00103336	0.00190525	0.00303549	0.00179223	0.00227662	0.000871896	0.00179223	0.00113024	0.018552	0.00310007	0.000339071	0.000678141	0.00193755	0.000823457	0.0019214	0.000694287	0.000435948	0.000484387	0.00316466	0.00400426
ASV82	0.00119482	0.00786321	0.000613556	0.000306778	0.000145316	0.000629703	0.00474699	0.00356831	0.00153389	0.00103336	0.00025834	0.000484387	0.00382665	0.000791165	0.000532825	0.000581264	0.00259954	0.000452094	0.000339071	0.000209901	0.000952627	0.00209901	0.00345529	0.00211516	0.00398812	0.000629703	0	0.000968773	0.000339071	0.000581264	0.00550586	0.00206672	0.000758872	0.00505377	0	0.00285788	0.00477928	0.0047147	0.00544128	0.00138857	0.0030032	0.00758872	0.003423	0.00506991	0.0051345	0.00221203	0.00710434	0.0186812	0.00374592
ASV83	0	0	0	0	0	0	0	0	0	0	0	0	0	0	0	0	0	0	0	0	0	0	0	0	0	0	0	0	0	0	0	0	0	0	0	0	0	0	0	0	0	0	0	0	0	0	0	0	0
ASV84	0.000565118	0	4.84e-05	0.00012917	0	0	0	6.46e-05	0	0	0.000548971	0	0.000694287	0.00109794	0.00167921	0.00114638	0.000661995	0.0010818	0.00381051	0.00692673	0.00739497	0.00403655	0.00151775	0.00240579	0.000387509	0.00474699	0.000920335	0	0.000532825	0.0012917	0.00187296	0.00700746	0.00172765	0.0131753	0.00921949	0.0123519	0.00205057	0.000371363	0.000322924	0.000758872	0.000290632	0.000419802	0.000694287	0.00526367	0.000984919	0.00253496	0.00208286	0.00138857	0.00284174
ASV85	0	0	0	0	0.000871896	0	0	0	0	0.000209901	0.00117867	0	0.0211193	0	0.00111409	0.000339071	0.000484387	0.000161462	0.034779	0.000209901	0.00408499	0.000500533	0.000419802	0	0.000548971	0	0	0	0.000500533	0	0	0	0	0	0.0558336	0.00529596	0.000613556	0	0	0	0	0	0	0	0	0	0	0.000322924	0.0107211
ASV86	0	0	0	0	0	0	0	0	0	0	0	0	0	0	0	0	0	0	0	0	0	0	0	0	0	0	0	0	0	0	0.000516679	0	0.00012917	0	0	0	0	0	0.0943908	0	0	0	0.0195046	0	0.00636161	0	0	0	0.00340685
ASV87	0	0	0	0	0.00134014	0.00124326	0.000823457	0.00193755	0.00196984	0.00117867	0.00180838	0.135095	0	0	0	0	0	0	0	0	0	0	0	0.000355217	0	0	0	0	0	0	0	0	0	0	0	0	0	0	0	0	0	0	0	0	0	0	0	0	0
ASV88	0.000419802	0.00167921	0.000419802	0.00135628	0.00167921	0	0.00229276	0.000193755	0.000548971	0.000888042	0.000952627	0	0.0106404	0.00340685	0.00779862	0.00970388	0.000871896	0.00101721	0.00167921	0.00295476	0.0025834	0.00335841	0.000807311	0.000629703	0.00469855	0.00770175	0.00111409	0.00113024	0.00137243	0	0.00208286	0.00216359	0.00046824	0.000548971	0.00226047	0.000339071	0.00119482	0.000484387	0.000548971	0.00484387	0.00272871	0.000758872	0.000339071	0.00111409	0.000694287	0.0153066	0.00649078	0.000419802	0.000452094
ASV89	0.000742726	0.00140472	0.00156618	0.00206672	0	0.000758872	0.000161462	0.000661995	0.00122711	0.00201828	0.0010818	0.000274486	0.000694287	0.00156618	0.00117867	0.00180838	0.00072658	0.000581264	0.000339071	0.00119482	0.00306778	0.0032131	0.00179223	0.00261569	0.00936481	0	0.000339071	0.000645849	0.0010495	0.00148545	0.00808926	0.00268027	0.00419802	0.00476313	0	0.00143701	0.00613556	0.00217974	0.0053444	0.000306778	0.00229276	0.000807311	0.000758872	0.00650693	0.00410114	0.00159848	0.0012917	0.0125133	0.00611942
ASV90	0.000758872	0.00361675	0.00190525	0	0.00694288	0.00482772	0.002761	0.0019214	0.00172765	0.00450479	0.00392353	0.00119482	0.000290632	0.000565118	0.00211516	0.000758872	0.00266413	0.000242193	9.69e-05	8.07e-05	0.00138857	0.0025511	0.000742726	0.000758872	0.00117867	0.000452094	0.000242193	0	0.00828301	0.00305164	0.00355217	0.00193755	0.000548971	0.00072658	0.000306778	0.00290632	0.00121097	0.00295476	0.00100107	0.000339071	0.00408499	0.00305164	0.00046824	0.00138857	0.000371363	0.00130784	0.00435948	0.00266413	0.0148384
ASV91	0.00143701	0.000145316	0.00289017	0	0	0.00400426	0	0.00140472	0.000920335	0.000371363	0	0.00269642	0.00190525	0.000290632	0.00737882	0.000274486	0.000968773	0.00135628	0.00130784	0	0.00909032	0.000435948	0.000290632	0.000936481	0.000306778	0	0.000274486	0.00203442	0.00968773	0.00413343	0.000403656	0	0	0.000645849	0.000403656	0	0.000532825	0	0.00114638	0	0	0.00243808	0.00012917	0	0	0	0.00190525	0.000871896	0.00536055
ASV92	0.00198599	0	0.00390739	0.00339071	0.00132399	0.0029709	0	0	0.00458553	0.00389124	0	0	0	0.00311622	0.00536055	0.00195369	0.00155004	0.00227662	0	0	0	0.00187296	0	0.00240579	0.00298705	0	0.00318081	0.00505377	0.00469855	0.00306778	0.00221203	0	0.0025834	0.00295476	0	0	0.00280944	0.00151775	0.00253496	0.00301934	0	0	0.0030032	0	0	0.00319695	0	0	0.00238964
ASV93	0	0	0	0	0.00166306	0	0	0	0	0	0.0053444	0	0	0.00245422	0	0	0.00248652	0.0191333	0	0.00532825	0	0	0	0.00765331	0	0	0	0	0	0	0	0	0	0	0	0	0.0300966	0.000306778	0	0	0.000678141	0.000661995	0.0133206	0	0	0.00025834	0	0	0.000984919
ASV94	0.00158233	0.000807311	0.0012594	0.000742726	0.00196984	0.00235735	0.000565118	0.00167921	0.000758872	0.00132399	0.00907418	0.00473084	0.00219589	0.00661995	0.000500533	0.000532825	0.000355217	0.000161462	0.00337456	0.00403655	0.000742726	0.000758872	0.00316466	0.00264798	0.000984919	0.000306778	9.69e-05	0.00025834	0	0.00025834	0.00130784	0.00132399	0.00113024	0.00196984	6.46e-05	0.00905803	0.000548971	0.00161462	0.00679756	0.00025834	0.00142087	0.00177608	0.000306778	0.00137243	0.0143863	0.0010818	0.00947783	0.00463397	0.00190525
ASV95	0	0	0	0	0	0	0	0	0	0	0	0	0	0	0	0.000145316	0	0.000177608	4.84e-05	0	0	0	0	0	0	0.00012917	0	0	0.00012917	0	0	0.000290632	0	0.000871896	0	0.000161462	0	0	0	0	0	0	0	0.000113024	0	0.00201828	0	0.000920335	0.000532825
ASV96	0.00287403	0.00473084	0.0010495	0.000791165	0.0017115	0.00185681	0.00306778	0.010818	0.00130784	0.00366519	0.00506991	0.0010818	0.00146931	0.00158233	0.000661995	0.00114638	0.000452094	0.000936481	0.000290632	0.000920335	0.00445636	0.0027933	0.00253496	0.00119482	0.00135628	0.00046824	0.000371363	0.000145316	0.000807311	0.000839603	0.00298705	0.00264798	0.00138857	0.0108664	0.000403656	0.00450479	0.000435948	0.00381051	0.00266413	0.000952627	0.00269642	0.00143701	0.000306778	0.00116253	0.00237349	0.00284174	0.000888042	0.00563503	0.00242193
ASV97	0.00715278	0.00382665	0.0154519	0.00124326	0.0133045	0.00264798	0.00997836	0.00502147	0.0087674	0.0012594	0.00892886	0.00101721	8.07e-05	0.000177608	0.00205057	0.013143	0.000871896	0	0	8.07e-05	8.07e-05	0.00172765	0.00371363	0.000871896	0.000113024	0.000742726	0.00085575	0	0.00205057	0	0	0.000581264	0.00012917	0	0	0.00012917	0	0.000548971	0.00839603	0	0.000226047	0	8.07e-05	0.00012917	6.46e-05	0	0	8.07e-05	0.000193755
ASV98	0	0	0	0	0	0	0	0	0	0.000904188	0	0	0.00122711	0.00510221	0	0	0	0	0	0	0	0.0083476	0.00167921	0.0426583	0.00360061	0.000758872	0	0	0.00111409	0	0	0	0	0	0.000371363	0	0	0.00264798	0.0147254	0	0	0.01634	0.000775019	0.000920335	0.00116253	0	0	0	0.00237349
ASV99	0.00025834	0.000226047	0.000161462	0	0	0	0	0	0.000419802	8.07e-05	0	0.000177608	0	0.000290632	4.84e-05	0.000290632	0.000419802	0	0.000209901	0	0.000968773	0.00155004	0	0.000193755	0.000645849	3.23e-05	0.000113024	0	0	0.000177608	0.000581264	0.00132399	0.000678141	0.000306778	0	0.00481157	0.00124326	0.00145316	0.00180838	0.0010495	0.00113024	0.00116253	0.000758872	0.0183583	0.0125779	0.000306778	0.00059741	0.00494074	0.00584493
ASV100	0.000242193	0.00100107	0.000177608	0.000565118	0.000193755	0.00682985	6.46e-05	0.000193755	0.000177608	0.000888042	0.000661995	9.69e-05	0.0457907	0.000209901	0.00025834	0.000226047	0.000661995	0.000209901	0.0025511	3.23e-05	0.000209901	0.000274486	0.00046824	8.07e-05	0.00103336	0.000888042	0.000661995	0.000565118	0.00613556	0.000387509	0.000274486	0.000904188	0.00253496	0.021749	0.000516679	0.000209901	0	0	0	0.000678141	0	0	1.61e-05	0.000209901	0	0.00340685	0.000435948	0.000177608	0.000113024
ASV101	0.00227662	0.00870281	0.00135628	0.0015016	0.000613556	0.00100107	0.00222818	0.00385895	0.00134014	0.00138857	0.00156618	0.000758872	0.00101721	0.00754028	0.00387509	0.00195369	0.00355217	0.00271257	0.000661995	0.00117867	0.00416573	0.0119805	0.00187296	0.00881584	0.00280944	0.000548971	0.000161462	0	0.000419802	0.000274486	0.0055543	0.00379436	0.000839603	0.00285788	3.23e-05	0.00137243	0.000710434	0.00148545	0.00510221	0.000403656	0.00117867	0.000984919	0.000645849	0.00198599	0.000807311	0.000548971	0.00473084	0.000435948	0.00314851
ASV102	0	0	0	0	0	0	0	0	0	0	0	0	0	0	0	0	0	0	0	0	0	0	0	0	0	0	0	0	0	0.00884813	0	0	0	0.103465	0	0	0	0	0	0	0	0	0	0	0	0.010382	0	0	0
ASV103	0.00235735	0.0198437	0.00463397	0.000839603	0.00699131	0.00251881	0.0126102	0.00393968	0.0017115	0.00203442	0.0085252	0.00414958	0.00106565	0.00156618	0	0.00408499	0.000888042	0	0.0010818	0.000516679	0	0.00208286	0	0.00214745	0.00209901	0	0	0.000629703	0.00072658	0.00085575	0	0	0.000403656	0.000209901	0.00868667	0	0.00137243	0	0.000193755	0.00156618	0	0	0	0	0.0021313	0.00506991	0	0.00182452	0
ASV104	0	0	0	0	0	0	0	0	0	0.00280944	0	0	0	0.0015016	0	0	0	0	0	0	0	0	0	0	0.000936481	0.0248813	0.000839603	0	0	0.000791165	0	0.0743372	0.00161462	0.00264798	0	0	0	0	0	0	0	0	0	0.00224433	0	0	0	0	0
ASV105	0	0	0.000548971	0.000548971	0	0	0.000290632	0.000339071	0	0	0.000355217	0	0.000322924	0.000322924	0.000904188	0	0.00025834	0.0012917	0.000306778	0	0	0.000242193	0.000322924	0.000871896	0.000645849	0.00101721	0.00561888	0.000645849	0.000387509	0	4.84e-05	0.00227662	0.00272871	0.000936481	0	0.00059741	0.000193755	0.000177608	0.000226047	0.000904188	0.000145316	0.000435948	0.000355217	0.000888042	0.00117867	0.00101721	0.0768722	0	0.00012917
ASV106	0.00266413	0.0130139	0.0049246	0.00602254	0.003423	0.00444021	0.0112701	0.00574805	0.0103174	0.00568347	0.00623244	0.00282559	0.000452094	0.00134014	0.000839603	0.00059741	0.00046824	0.000355217	0.000339071	0.000274486	0.000613556	0.000758872	0.000516679	0.000548971	0.000226047	0.000565118	0.000161462	0.000452094	0.00046824	0.000419802	0.0012917	0.000807311	0.000936481	0.000775019	0.000387509	0.00142087	0.00059741	0.000758872	0.000904188	0.000661995	0.000920335	0.000952627	0.000661995	0.00143701	0.00175994	0.000742726	0.000403656	0.00135628	0.00132399
ASV107	0.000209901	0.00117867	0.000306778	0.00059741	0.000419802	0	0.00132399	0	0	0.000871896	0.000161462	0	0.000322924	0.00106565	0.00046824	0.000209901	0.00114638	0.000339071	0.000177608	0.000355217	0.000984919	0.00151775	0.000274486	0.000565118	0.000322924	0.000516679	0.0012917	0.000823457	0.00211516	0.00106565	0	0.000742726	0	0.00046824	0.00059741	0.00456938	0.00613556	0.00085575	0.00205057	0.0686537	0.00190525	0.000678141	0.00046824	0.000968773	0.000807311	0.00109794	0.000322924	0.000322924	0.000694287
ASV108	0	0.000193755	4.84e-05	0.00461782	0	0.000177608	6.46e-05	0.000177608	0.000242193	0.00434333	0	0.000484387	0.000516679	0.00728194	0.000226047	0.000371363	0	0	0.00059741	0.00335841	4.84e-05	0.00933251	0	0.000968773	0.000177608	4.84e-05	0	0.000565118	0	0.000500533	0.000355217	0.0618239	0	0	0	0	0.000193755	0.000435948	0	0	0.000968773	0	0	0.00439177	0	0.00219589	0.00101721	0.000532825	0.00167921
ASV109	9.69e-05	0.00012917	0	0.0205703	0.000742726	0	0	0	0.00012917	0.00390739	0.000484387	0	0	0	0	0	0.000355217	0	0	0	0	0	0	0	0	0	0	0	0.00387509	0.00699131	0	0	0	0	0	0.00828301	0	0	0.00134014	0	0	0	0	0	0.000435948	0	0	0.000565118	0
ASV110	0	0.00269642	0.00109794	0.000839603	0.00448865	0.00134014	0.000500533	0.0110602	0.00237349	0.00198599	0.00122711	0.00117867	0.0205057	0.000613556	0.000500533	0.00059741	0.000516679	0.0057642	0	0.000290632	0.000645849	0.00146931	0.000839603	0.00179223	0.0164207	0.000565118	0.000532825	0	0.000791165	0.00085575	0.000661995	0.00127555	0.00350373	0.00103336	0.0036329	0.00353602	0	0.000355217	0.000226047	0.000419802	0.000613556	0.00248652	0.000355217	0.000839603	0.000742726	0.000629703	0.000306778	0.00103336	0.000419802
ASV111	0	0	0	0	0	0	0	0.00025834	0	0	0	0	0	0	0	0	0	0	0	0	0	0	0	0	0.00046824	0	0	0.000161462	0	0.000904188	0.103223	0.000775019	0.0012594	0.0012917	0	0	0.000306778	0	0	0	0	0	0.00138857	0	0	0	0	0	0
ASV112	0	0.00100107	0.000484387	0.00025834	0.00545742	0.00217974	0.000177608	0.00287403	0.000532825	0.00348758	0.00292247	0.00301934	0.00113024	0.00182452	0.00284174	0.000145316	0.000306778	0	0.000839603	0.00106565	0.000322924	0.00557045	0.00046824	0.00143701	0.00025834	0.000322924	0.000419802	0.00025834	8.07e-05	0.00106565	0.000516679	0.0063939	0.00266413	0.00206672	0.00046824	0.000694287	0.00177608	0.000694287	0.00724965	0.0318726	0.000306778	0.00184067	0.00101721	0.000839603	0.000516679	0.000678141	9.69e-05	0.00230891	0.00085575
ASV113	0	0	0	0	0	0	0	0	0	0	0	0	0	0.00348758	0.037653	0.0129008	0.000419802	0	0.000322924	0.00240579	0.0087351	0.00584493	0.000322924	0	0	0	0.000339071	0.00904188	0.00448865	0.00348758	0	0	0	0.000193755	0.00085575	0	0	0	0	0	0.0114961	0	0	0	0	0	0.0070559	0	0
ASV114	0.0023412	0.00217974	0	0	0	0	0.000839603	0.00134014	0	0	0	0	0	0	4.84e-05	0	0	0	0	0	0.000968773	0	0	0	0	0	0	0.0536539	0	0	0	3.23e-05	9.69e-05	0.0184228	0	0	0.00318081	0	0	0	0.0214745	0	0	0	0	0	0.00221203	0	9.69e-05
ASV115	0.0021313	0.00059741	0.00314851	0.00251881	0.00130784	0	0.00121097	0.0021313	0.00155004	0.00166306	0.000775019	0	0.00111409	0.00111409	0.00164691	0.00114638	0.00163077	0.00456938	0.000678141	0.00411729	0.000888042	0.00142087	0.00316466	0.000613556	0.000823457	0.00263183	0.00427875	0	0.0010495	0.000904188	0.000452094	0.000839603	0.00393968	0	0.000710434	0.00161462	0	0.000661995	0.00072658	0.00103336	0.00392353	0.000791165	0.00116253	0.00679756	0.00172765	0.00466626	0.00205057	0	0.00155004
ASV116	0.00137243	0.0121742	0	0.00368134	0.000678141	0.00494074	0.0012594	0.00127555	0	0.00106565	0.000581264	0	0	0.00716892	0.000532825	0.00143701	0.00224433	0	0.000145316	0.000694287	0.00012917	0.000403656	0	0.000322924	0.00179223	0.00135628	0.00114638	0.00143701	0.0015016	0	0.000661995	0	0.00172765	0	0.000678141	0	0	0.00264798	0.00277715	0.00224433	0.000565118	0.00545742	0	0.00132399	0.000629703	0.000629703	0.00046824	0.00537669	0
ASV117	0	0	0	0	0	0	0	0	0	0	0	0	0	0	0	0	0	0	0	0	0	0	0	0	0	0	0	0	0	0	0	0	0	0	0	0	0	0	0	0	0.0166952	0	0	0	0	0	0	0	0
ASV118	0.00156618	0	0	0.00222818	0.0520393	0	0	0	0	0.00519908	0.030032	0.00972003	0	0	0	0	0.00158233	0	0	0	0	0	0.000968773	0	0	0.000274486	0	0.000807311	0	0	0	0	0	0.000968773	0	0	0	0	0	0	0	0	0	0	0	0	0	0	0
ASV119	0	0.000548971	0.000694287	0.000661995	0.00361675	0.00180838	0.00130784	0.00193755	0.00410114	0.00109794	0.00846062	0.000920335	0.000322924	0.000952627	0.000791165	0	0	0	0	0.000984919	0.00109794	0	0	0	0.00124326	0	0.00723351	0	0.000565118	0	0.000435948	0	0.0192301	0.00200213	0.000904188	0	0	0.000936481	0.00143701	0.00137243	0	0	0	0.00135628	0.00271257	0.00650693	0	0	0.00025834
ASV120	0.000145316	0.0101883	0	0.00245422	0	0	0.00615171	0.00046824	0.00025834	0.00515064	0.000177608	0	0.00146931	0	0.00631317	4.84e-05	0	0.00106565	0.00059741	6.46e-05	0.00389124	0.000113024	0	0.0012917	0	0	0.00025834	0.00878354	0.00140472	0.00012917	0	0.000500533	0	0.00377822	0	0.000371363	0.000581264	0.000242193	0	0.00167921	0.000193755	0.000355217	0.000355217	0.00153389	0.000113024	0	0.000193755	0.000322924	0.0123357
ASV121	0.00763716	0.00750799	0.000645849	0.00121097	0	0.00429489	0.00177608	0.00322924	0.000807311	0	0	0.00314851	0	0	0	0	0	0	0	0	0	0	0	0	0	0.000355217	0	0	0	0	0.00025834	0.000742726	0	0.000678141	0	0	0.0277231	0.00161462	0	0	0.0019214	0.00137243	0.0066038	0.000920335	0.000678141	0.000306778	0.0150644	0	0.00358446
ASV122	0	0.000242193	0.000177608	0	0.000484387	0	0	0	0	0	0	0.000193755	0	8.07e-05	0.000161462	0	0.00012917	0	4.84e-05	0	0	0	0	0.0166145	0.000435948	0.000177608	0.00284174	0	0.000226047	0.000355217	0.000355217	0	0.0101883	0.000419802	0.000145316	0.00158233	0.00012917	0.000403656	0	0	0	0	0	0.000435948	0.00127555	0.000322924	0	0.00644234	0.000403656
ASV123	0	0	0.0646172	0.00287403	0.0110763	0	0	0	0.00721736	0	0.00418187	0.00277715	0	0	0	0	0	0	0	0	0	0	0	0	0	0	0	0	0	0	0	0	0	0	0	0	0	0	0	0	0.000274486	0	0	0	0	0	0	0	0
ASV124	0	0.00085575	8.07e-05	0.000290632	6.46e-05	0.000839603	0.000419802	0.000113024	0	0	8.07e-05	9.69e-05	0.000145316	0.000145316	0.00046824	0.000145316	0.000678141	0.00059741	0	0	0	0	0.000371363	0.000290632	0.000775019	0.0012917	0.00650693	0.00103336	4.84e-05	0.00106565	0.000387509	0.00121097	0.00305164	0	0.000387509	0.00143701	0.0023412	0.00284174	0.000904188	0	0.00287403	0.00103336	0	0.000193755	0.00158233	0.000274486	0.00351988	0	0.0159202
ASV125	4.84e-05	0	0	0	0	0	0	0	0.00012917	0	0	0.000500533	0.00151775	0.00072658	0.00151775	0.000565118	0.00455323	0.00253496	0.000710434	0.000113024	0.00474699	0.00269642	0.00733038	0.00184067	0	0.000161462	0.000161462	0.000355217	0.000209901	0.000791165	0	0	0.00406885	0.00741112	0	0.0066038	0.0141441	0.0015016	0.000888042	0.000290632	0.00989763	0.000565118	0.00571576	0.00109794	0.0019214	0.000613556	0.00130784	0.000290632	0.00085575
ASV126	0.000226047	0	0.000694287	0	0	0.00650693	0.00377822	0.000113024	0.000516679	0.000161462	0	6.46e-05	0	0.000242193	0.00166306	0.00263183	0.00479543	0.000435948	0	0	0.000145316	0.000484387	0.000581264	0.000290632	0.00230891	0.000371363	0.00100107	0.00169535	0.00085575	0	0.00340685	0.000209901	0.000193755	0.000403656	0	0.000274486	0.00046824	0.00224433	0.00114638	0.00329383	0.00145316	0.000452094	0.000193755	0.000791165	0.000290632	0.000694287	0.000678141	0.0021313	0.00393968
ASV127	0	0	0	0	0	0	0	0	0	0	0	0	0	0.000904188	0	0	0	0	0.00195369	0.0496173	0.000613556	0	0	0	0	0	0	0.000387509	0	0.00364905	0	0	0	0.00862208	0	0.0161947	0	0	0	0	0	0	0	0	0	0	0	0.000904188	0
ASV128	0	0	0	0	0	0	0	0	0	0	0	0	0	0	0	0	0	0	0	0	0	0	0	0	0	0	0	0	0	0	0	0	0	0	0	0	0	0.00012917	0.000242193	0.0876417	0	0	0.000113024	0.00025834	0	0.0027933	0	0	0
ASV129	0	0	0	0	0	0	0	0	0	0	0	0	6.46e-05	0	0	0	0	0	0	0	0	0	0	0	0	0	0	0	0	0.0157587	3.23e-05	0	0.00012917	0.00012917	0.00159848	0.0629703	0.00025834	0	0.00025834	0.000161462	0.000355217	0.00100107	0.000161462	0.00046824	0.000339071	0	0	0.00193755	0
ASV130	0.00264798	0.013805	0	0	0	0	0.00634546	0.00949398	0	0	0	0	0.000936481	0	0.000419802	0.00414958	0	0	0.00059741	0.000322924	0	0.0342461	0	0	0	0	3.23e-05	0	0.000742726	0	0	0	0	0	0	0.000193755	0	0.000968773	0	0	0.000242193	0	0	0.00116253	0	0	6.46e-05	4.84e-05	0
ASV131	0.000694287	0.000613556	0.000161462	0.000807311	0	0.000226047	0	0.000419802	0.000742726	0.00206672	0.000613556	0.000371363	0.000775019	0.00103336	0.00206672	0	0.00127555	0.0012594	0.000209901	0.000678141	0.00410114	0.0015016	0.000742726	0.000532825	0.000839603	0.00012917	0	0.000145316	0.000193755	0.00059741	0.00174379	0.00175994	0.00264798	0.00117867	0.000274486	0.000742726	0.00146931	0.00920334	0.00193755	0	0.00124326	0.0019214	0.000532825	0.000516679	0.000613556	0	0.00216359	0.0048923	0.00671683
ASV132	0	0	0.0662802	0	0	0	0	0	0.0180353	0	0	0	0	0	0	0	0	0	0	0	0	0	0	0	0	0	0	0	0.000661995	0	0	0	0	0	0.000435948	0	0	0	0	0	0	0	0	0	0	0	0	0	0
ASV133	0	8.07e-05	0.00109794	9.69e-05	0.000516679	0.000484387	0.000177608	0.000387509	0.000306778	3.23e-05	0.00179223	0	0.0010495	0.00109794	0.00138857	0.000936481	0.0327445	0.00012917	0.000839603	0.000290632	0.00025834	0.00072658	0.000322924	0.000161462	0.00046824	0.00085575	0.000193755	0.00282559	0.00805696	0.00547357	0	0.000177608	9.69e-05	0.000226047	0.000581264	0.00114638	0.000791165	0.00121097	0.000936481	0.000226047	0.0012917	0.00860594	0.000645849	0.000290632	0.000226047	9.69e-05	0.00250266	0.000274486	0.00046824
ASV134	0.00272871	0.00343914	0.000839603	0	0	0	8.07e-05	0.00182452	0.00119482	0	0.000242193	0	0.00737882	0.00356831	0.000500533	0.000209901	0.000355217	0.000113024	0.00012917	0.000242193	0.000403656	0.000226047	0.000290632	0.00156618	0.0373139	0.00498918	0.00177608	0.00205057	0.00146931	0.000694287	9.69e-05	0.000226047	0.000984919	0.00059741	0	0.00114638	0.000274486	0.000145316	0	0	0.000613556	0.00142087	0.000274486	0.000242193	0.00103336	0	0.00101721	0.00111409	0.000177608
ASV135	0	0	0.000242193	0.000339071	0.000484387	0.000484387	0.0015016	0.00432719	0.00138857	0.00208286	0.0038428	0.0109956	0.000629703	0.000274486	0.000613556	0.000419802	0.000371363	9.69e-05	0.000775019	0.000694287	0.000694287	0	0.00025834	0.000145316	0.000242193	0	0	0	3.23e-05	0.000984919	0.000306778	0.000484387	0.00206672	0.000871896	0	0.00729809	0.000484387	0.00072658	0.000581264	0.000968773	0.00148545	0.00355217	0.000952627	0.00253496	0.006184	0.00247037	0.000452094	0.00361675	0.000629703
ASV136	0.000791165	0.00163077	0.000435948	0.000758872	0.000419802	0.000710434	0	0.00103336	0.000661995	0.00169535	0.00193755	0.000548971	0.0012594	0.00175994	0.0175671	0	0.0019214	0.000888042	0.0152743	0.00137243	0.000613556	0.0036329	0.00111409	0.000807311	0.00012917	0.000565118	0.000322924	0.000613556	0	0.000113024	0.00132399	0.00510221	8.07e-05	0.00059741	0.000226047	0.00442406	0.000209901	0.000209901	0.00134014	0.000193755	0.00113024	0.000613556	0.000226047	0.000226047	0.000968773	0.000532825	6.46e-05	0.000548971	0.00377822
ASV137	0.00494074	0	0	0	0	0.00886427	0	0.00155004	0	0	0.00025834	0.000322924	0	0	0.000791165	0.00665224	0.00579649	0.000758872	0	0	0	0.0105919	0.00169535	0.00421416	0	0.00155004	0.00439177	0.00200213	0.0280298	0.000226047	0	0.00266413	0.000581264	0.000306778	0.000613556	0	0	0	0	1.61e-05	0	0.00109794	0	4.84e-05	4.84e-05	0	0	0.000161462	0
ASV138	0	0	0	0	0	0.00046824	0	0.000113024	0	0.00140472	0.00012917	0	6.46e-05	0	9.69e-05	4.84e-05	0.000871896	0	9.69e-05	0.00155004	0	0	0	0.000306778	0.000484387	0.000226047	0	0.000226047	0.0143217	0	0.000548971	0.00111409	0	0.000161462	0.00184067	6.46e-05	9.69e-05	4.84e-05	0	0.000242193	0.000952627	0	0	8.07e-05	0	0.00025834	0.000419802	0.000177608	0.00113024
ASV139	0	0.00180838	0	0	0	0	0	0.000548971	0	0.00046824	0	0	0	0	0	0	0	0	0	0	0	0	0	0	0	0	0	0	0	0	0.00059741	0	4.84e-05	0	0	0	0	0	0.00424646	0	0	0	0.00179223	0	6.46e-05	0	0	0.000823457	0
ASV140	0	0	0.000290632	0.00284174	0	0	0	0	0.000484387	0.00179223	0.000419802	0	0.000645849	0.00119482	0.00358446	0.00135628	0.00137243	0	0.000500533	0.00114638	0.00256725	0.00185681	0	0	0	0	0	0.00358446	0.00172765	0.00219589	0.00114638	0	0	0.00466626	0	0.0029709	0.00193755	0.000678141	0	0.0010495	0.00290632	0.00219589	0.00180838	0.00203442	0	0.00177608	0	0.00310007	0.002761
ASV141	0	0.0332774	0	0.00121097	0.00130784	0.0010495	0.00531211	0.000322924	0	0	0	0.000242193	0	0	0	0	0	0	0	0	0	0	0	0	0	0	0	0	0	0.00012917	0	0	0	0	0	0	0.00292247	0.000839603	0	0	0.000484387	0.00531211	0	0	0	9.69e-05	0	0	0.00314851
ASV142	0	0	0	0	0	0	0	0	0	0	0	0	0.00109794	0	0	0	0	0	0	0	0	0	0	0.00085575	0.0642781	0	0	0	0	0	0.0110925	0	0	0	0	0	0	0	0	0.00263183	0	0	0.000516679	0	0	0.000581264	0	0	0
ASV143	0.000161462	0.00406885	0.00012917	0.000290632	0.00109794	0.000177608	0.0144024	0.000888042	0.000290632	0.000613556	0.00140472	0.00261569	0.000581264	0	0.00474699	0.00634546	0.00469855	0.00319695	9.69e-05	0.000161462	0.00122711	0.00332612	0.00177608	0.000888042	0	0	0	0	0	0	0	0	0	0	0	0.000516679	0.000355217	0.000209901	0.00101721	0.00274486	0.00140472	0.000403656	9.69e-05	0.00119482	0.000613556	0.00116253	0.00371363	0.00148545	0.000193755
ASV144	0	0	0	0	0.0551878	0.00135628	0	0.000952627	0.00247037	0	0.0216521	0	0	0	0	0	0	0	0	0	0	0	0	0	0	0	0	0	0	0	0	0	0	0	0	0	0	0	0	0	0	0	0	0	0	0	0	0	0
ASV145	0	0	0	0	0	0	0	0	0	0	0	0	0.00350373	0.00179223	0.00458553	0.0102851	0.00695902	8.07e-05	0.00361675	0.0264959	0.00287403	0.0023412	0.000484387	0.000710434	0.00358446	0.000936481	0.00155004	0	0.00579649	0	0	0	0	0	0	0	0	0	0	0	0	0	0	0	0	0	0	0	0
ASV146	0	0	0	0	0	0	0	0	0	0	0	0	0.000177608	0	0.000226047	0.000355217	0.0456454	0	0	0	8.07e-05	6.46e-05	0.000145316	0.0010818	0.000387509	0	8.07e-05	0	0.036329	0	0	0	0	0	0	0	0	0	0	0	0	0	0	0	0	0	0	0	0
ASV147	0.00012917	0.000371363	0.000113024	0.0170504	9.69e-05	0	0	0	9.69e-05	0.00408499	4.84e-05	0	0.000161462	6.46e-05	0.00208286	0.00293861	0.000113024	0.00175994	8.07e-05	6.46e-05	0.00287403	0.000419802	0.000145316	0.0030032	3.23e-05	0	0	0	0.000145316	0	0.000242193	0	0	0	0	0.000226047	8.07e-05	0.000742726	0.000193755	0.0336649	0.000177608	0.000355217	8.07e-05	0.000290632	0.000274486	0.000355217	0.000113024	0	0
ASV148	0	0.000452094	0	0	0	0.000161462	0	0.000193755	0	0	0	0	0	0	0	0	0	0	0	0.000419802	0.000161462	0.000339071	0	0	0	0	0	0	0	0	0.000339071	0.00327768	0	0	0	0.000871896	0.000193755	0.000694287	0.000629703	0.0394614	0.000177608	0.000306778	0.00072658	0	0.000193755	0.0142894	0	0.00046824	0.000565118
ASV149	0.000484387	0.035554	0.000274486	0.000355217	0	0	0.011044	0.00200213	0.00025834	0	0.00804082	0	0	0	0	0	0	0.000629703	0	0	0	0	0	0.0112055	0	0.000161462	0.000113024	0	0	9.69e-05	0	0	0	0	0	0	0	0	0	0	0	0.00226047	0	0	0	0.000193755	0	0.00134014	0
ASV150	0.00508606	0	0.00135628	0	0.00253496	0.00427875	0.0030032	0	0	0	0.00823457	0	0	0	0.0091872	0.00332612	0	0	0	0	0	0	0.00166306	0	0	0.00174379	0	0.000920335	0.00237349	0.000742726	0	0.00348758	0	0.00744341	0	0	0.00127555	0.00243808	0	0.000387509	0	0	0	0	0.00435948	0.0010495	0	0	0
ASV151	0.000500533	0.00536055	0.000339071	0.000226047	0.000306778	0.002761	0.000629703	0.00161462	0.000339071	0.00109794	0.00155004	0.000565118	0.00106565	0.000984919	0.00206672	0.00121097	0.000823457	0.00085575	0.000516679	0.00153389	0.0091872	0.00700746	0.00180838	0.00232506	0.00109794	0.000177608	0	0.000645849	0.000661995	0.000242193	0.00226047	0.000888042	0.000694287	0.00153389	0	0.00360061	0	0.0010495	0.00132399	0.000403656	0.000419802	0.00103336	0.00059741	0.00242193	0.00119482	0.000678141	0.000548971	0.00114638	0.00119482
ASV152	0	0	0	0	0	0	0	4.84e-05	0	0.000113024	0	0	0.000306778	0	0.000226047	0	0	0	0	0.000484387	0	0	0.000984919	0	0	0	0	0.00455323	0	0.000419802	0.000226047	0.000242193	0.000306778	0.0462912	0	0.00360061	0.00750799	0.00100107	0	0	8.07e-05	0.000355217	0.00348758	0	0.000226047	0.00143701	8.07e-05	0	0
ASV153	0	0.00271257	0	0.000823457	0	0	0	0	0	0.00240579	6.46e-05	0	0.00229276	0.00256725	0	0.000581264	0.000355217	0.000500533	0.00153389	0	0.000984919	0.0124487	0.00229276	0.000193755	0	0.00059741	0	0	0.000242193	0.00085575	0	0.00353602	0	0.00188911	0	0.00739497	0.00111409	0.000694287	0.00217974	0	0.00151775	0.00251881	0	0.00166306	0.00119482	0.000193755	0.00547357	0.00301934	0.00589337
ASV154	0.00232506	0.00100107	0.00184067	0.00143701	0	0.00226047	0.0010495	0.00127555	0.00188911	0	0.0012917	0.00289017	0.000678141	0.000791165	0	0.00248652	0	0.00137243	0	0.00167921	0	0.0010818	0.00138857	0.000710434	0	0.00143701	0.00109794	0	0	0	0.000500533	0	0.00266413	0.0015016	0	0.00235735	0.00356831	0	0.000532825	0	0.00158233	0	0.00674912	0.00240579	0.00230891	0	0.00161462	0.000871896	0.000661995
ASV155	0.000161462	0.00153389	0.000613556	0.000678141	0.000710434	0.00256725	0.00072658	0.00200213	0.000823457	0.000742726	0.000565118	0.000823457	0.00169535	0.00103336	0.00324539	0.00440792	0.0109633	0.000226047	0.00046824	0.000500533	0.0199244	0.00190525	0.00134014	0.00205057	0.00190525	0.000145316	0.00106565	3.23e-05	0.00579649	0	3.23e-05	3.23e-05	4.84e-05	4.84e-05	0.000322924	0.000145316	3.23e-05	0	1.61e-05	0	4.84e-05	9.69e-05	9.69e-05	0.000306778	0.000209901	9.69e-05	0.00025834	6.46e-05	9.69e-05
ASV156	0.0023412	0	0.0044725	0	0.00311622	0.00161462	0	0.000694287	0.00113024	0.000306778	0.000968773	0	0	0.000968773	0.00182452	0.00230891	0.000565118	0.0048923	0	0	0.000177608	0.000452094	0.000274486	0.00101721	0	0.000888042	0.000226047	0.00248652	0	0.0162754	0	0.000419802	0	0.000306778	0	0.000904188	0	0.000548971	0	0.00376207	0.00334227	0.00106565	0	0.000177608	0	0	0.00343914	0.00025834	0
ASV157	0.000984919	0.000775019	0.000484387	0.000871896	0.000661995	0.000888042	0.000532825	0.00114638	0.000645849	0.000242193	0.000339071	0.00137243	0.00116253	0.00111409	0.00180838	0.00161462	0.00259954	0.00187296	0.000629703	0.000548971	0.00142087	0.00148545	0.000710434	0.00117867	0.00155004	0.000645849	0.000952627	0.00130784	0.00211516	0.00114638	0.0015016	0.00172765	0.00261569	0.00203442	0	0.000791165	0.00072658	0.000791165	0.000678141	0.000629703	0.00211516	0.00169535	0.00179223	0.00179223	0.00232506	0.00153389	0.000936481	0.000952627	0.00085575
ASV158	0	0	0	0	0	0	0	0	0	0	0	0	0.000694287	0	0	0	0	0	0	0	0.0017115	0	0	0	0	0	0	0.013918	0.00208286	0.00151775	0.000161462	0.0124164	0.000694287	0.00059741	0	0.00085575	0	0.00403655	0.000645849	0	0.00616786	0.00500533	0	0.00187296	0.000339071	0	0.00175994	0.0132238	0
ASV159	0	0	0	0	0	0	0	0	0	0	0	0	0.000936481	0	0	0	0.000306778	0	0.000226047	0	6.46e-05	0	0.000968773	0.000209901	0.000274486	0	0	0.000193755	0.00339071	1.61e-05	0	0	0	0.00203442	0.000403656	0.000435948	0.000161462	0.000403656	0.000452094	0.000177608	0.0205218	0.000871896	0	0.00130784	0.000452094	0.000532825	0.0304195	0.00188911	0
ASV160	0.00046824	0.00206672	0.000565118	0.00313237	0.00219589	0.00124326	0.00565118	0.00203442	0.00127555	0.00411729	0.000645849	0.00137243	0.000355217	0.000306778	0.00046824	0.000435948	0.000242193	0.000532825	0.00229276	0.000193755	0.000920335	0.000823457	0.000807311	0.00487616	0.000629703	0	0	0	0	0	0.0012917	0.00046824	0.00169535	0.000775019	0.00127555	0.00214745	0.000645849	0.000839603	0.00163077	0.000661995	0.000548971	0.00143701	0.000371363	0.00184067	0.00232506	0.000710434	0.000904188	0.0010495	0.00116253
ASV161	0	0	0	0	0	0	0	0	0	0	0	0	0	0	0	0.00335841	0	0	0	0	0	0	0	0	0	0	0	0	0	0	0	0	0	0	0	0	0.00122711	0	0	0.000548971	0.0433849	0	0	0	0	0	0.0160655	0	0
ASV162	0	0	0	0	0	0	0	0	0	0	0	0	0	0	0.00198599	0	0	0	0	0	0.0622114	0.000532825	0.00025834	0	0	0	0	0	0	0	0	0	0	0	0	0	0	0	0	0	0	0	0	0	0	0	0	0	0
ASV163	0.000532825	0.00130784	0.000661995	0.0012917	0.000306778	0.000113024	0.0012917	0.0012917	0.000871896	0.000952627	0.000371363	0	0	0.00121097	0.0012594	0.000532825	0.00140472	0.00516679	0	0.00059741	0.00117867	0.000209901	0.000661995	0.00280944	0.000968773	0.000435948	0.000516679	0	0.000661995	0.000565118	0.000403656	0.000339071	0.000613556	0.000193755	0	0.00127555	0.000371363	0.000516679	0.00146931	0.00301934	0.00179223	0.00184067	0.000645849	0.00085575	0.00148545	0.000629703	0.00137243	0.00188911	0.00101721
ASV164	0.00121097	0.000242193	0.000678141	0.00132399	0.00196984	0.000920335	0.00072658	0.000823457	0.00116253	0	0.00130784	0.000581264	0.000871896	0.00816999	0	0.00188911	0.00116253	0.000904188	0.000645849	0.000339071	0.000209901	0.00100107	0	0.00072658	0.00103336	0	0.00266413	0.00121097	0.000484387	0	0.00113024	0.000839603	0.00211516	0.000532825	0.00616786	0	0.000807311	0.000613556	0.000484387	0.00172765	0.00224433	0.0015016	0.00103336	0	0	0	0	0	0.00100107
ASV165	0.00012917	0	0.0158879	0.000484387	0.000371363	0.00264798	0.000145316	0.00121097	0.00124326	0.000435948	0.000613556	0.000339071	0.000871896	0.00135628	0.000387509	0	0.00127555	0.00166306	8.07e-05	0.000758872	0	0.000113024	0.000613556	0.000629703	0.000322924	0.000452094	0.00159848	0.000113024	0.000161462	9.69e-05	0	0.000371363	0.00356831	0.000548971	0.00235735	0.00122711	6.46e-05	0	0.000532825	0.00348758	0.000209901	0.000161462	0	6.46e-05	0.000177608	0.0115607	0.000661995	0	0.0012917
ASV166	0	0	0	0	0	0	0	0	0	0	0	0	0.000694287	0	0	0	0	0	0	0	0	0	0	0	0.047809	0	0.000758872	0	0.000629703	0.000371363	0.00666839	0.000371363	0.00524752	0	0	0	8.07e-05	0	0	0	0	0.000161462	0	0	0	0	0	0	0
ASV167	0.00059741	0.00589337	0.000339071	0	0	0	0.00206672	0.000920335	0	0	0	0	0.00306778	0.00268027	0	0.00224433	0	0.00282559	0.00172765	0.00111409	0.00158233	0.00145316	0.00151775	0.0017115	0.00374592	0.00172765	0.00319695	0.000661995	0.00256725	0.000936481	0	0.000710434	0.00119482	0.000952627	0.00193755	0.000871896	0.000565118	0.000113024	0.000387509	0.000274486	0.000710434	0.00134014	0	0.000548971	0.000710434	0.000678141	0.000226047	0.00167921	0
ASV168	0.000952627	0.000355217	0.000645849	0.000403656	0.000290632	0	0.000694287	0.00109794	0.00101721	0.000629703	0.000613556	0.000984919	0.00085575	0.000920335	0.00169535	0.00121097	0.00159848	0.000936481	0.000371363	0.000581264	0.00119482	0.000710434	0.000694287	0.000500533	0.000888042	0.000484387	0.000403656	0.00103336	0.00113024	0.00111409	0.00109794	0.000484387	0.00158233	0.000500533	0	0.000839603	0.0015016	0.00153389	0.00156618	0.0010818	0.00222818	0.00122711	0.00185681	0.000952627	0.00138857	0.000775019	0.00142087	0.00111409	0.00121097
ASV169	0	0	0	0	0	0	0	0	0	0	0	0	0	0	0	0.00973617	0	0.00122711	0.00130784	0	0	0.0085252	0	0.00224433	0	0	0	0	0	0	0	0	0	0	0	0	0	0	0	0	0.000500533	0	0	0	0	0	0	0.000193755	0
ASV170	0.0010495	0.000791165	0	0	0	0.000758872	0.00046824	0.0010818	0	0	0	0.000710434	0.00140472	0.000306778	0.000871896	0	0.00119482	0	0.00121097	0	0.000306778	0.000145316	0.000888042	0.000516679	0.00209901	0.000613556	0.000871896	0	0.00305164	0.00324539	0.00240579	0.000742726	0.00109794	0	0.000226047	0.0032131	0.000435948	0.00153389	0	0	0.000694287	0.0055543	0.00119482	0.00166306	0	0	0.000339071	0.00655536	0.00174379
ASV171	0	0.00571576	0.000322924	0.00012917	0	0	0.00205057	0	0	0	0	0	0.00059741	0.0243808	0	0.000339071	0	0	0	0.00623244	0	0	0	0	0.0122227	0.000500533	0	0	0	0	0.00844447	0.00025834	0	0	0	0	0	0	0	0	0	0	0.000242193	0	0	0	0	0	0
ASV172	0	0	0	0	0	0	0	0	0	0	0	0	0.00287403	0.002761	0.0025834	0.00510221	0.00602254	0.000209901	0.000629703	0.000952627	0.00568347	0.00712048	0.000419802	0.0163884	0.0025834	0.00164691	0.00116253	0	0.00481157	0	0	0	0	0	0	0	0	0	0	0	0	0	0	0	0	0	0	0	0
ASV173	0.000177608	0.000694287	0	0	0	0.000209901	0.00106565	0.000290632	0.00188911	0.000274486	0.000193755	0.000306778	0.000274486	0.000242193	0	0	0	0.00012917	0.000532825	4.84e-05	0	0.000548971	0	0.00046824	0.000968773	0	0	0	0	1.61e-05	0.000710434	6.46e-05	0	0	0	0.000161462	0.00103336	0.00072658	0.00072658	0.0209739	0.000516679	0.000613556	0.000242193	0.00117867	0.00132399	0.0147415	8.07e-05	0.000791165	0.00214745
ASV174	0.00059741	0.000565118	0	0.00185681	0.00132399	0	0.00156618	0.000888042	0.000500533	0.000807311	0.000661995	0.0015016	0.000403656	0.00025834	0.000775019	0.000371363	0.00046824	0.00046824	0.000452094	0.000322924	0.000984919	0.000403656	0.000161462	0.000645849	0.000548971	0.000403656	0.000484387	0.000694287	0.000629703	0.00132399	0.0010495	0.00072658	0.00132399	0.00222818	0.000355217	0.00117867	0.000775019	0.000888042	0.000371363	0.000920335	0.000678141	0.000694287	0.00230891	0.00180838	0.00138857	0.000904188	0.00329383	0.00196984	0.0010818
ASV175	0	0	0	0.000226047	0.000387509	0.000209901	0.000145316	0.000435948	0.000403656	0.000355217	0.000419802	0.000193755	0.000613556	0	0	0	0	0	0	0	0	0	0	0	0.000775019	0	0	0	0	0	0	0.00615171	0	0	0	0	0	0	0	0	0	0	0	0.015678	0.0036329	0.00287403	0	0	0
ASV176	3.23e-05	0.00072658	0	0	0	0	0.00208286	0	0	0	0	0	0.00169535	0.0129331	0.000823457	0.00673297	0.000807311	0.00195369	0.000371363	0.00410114	0	0.00440792	0	0.000952627	0.000419802	0.000516679	0	0	0	0.000274486	0	0	0	0	0.000403656	0.000371363	0.000403656	0	0.00209901	0.00256725	0.00293861	0.00114638	0.000274486	0	0.00103336	0.00117867	0.000613556	0.000565118	0.00106565
ASV177	0	0.000290632	0	0.000322924	4.84e-05	0.000694287	0.000242193	0.000145316	0	0.000532825	0.000145316	0.000274486	0	0.000226047	0	0	0.000242193	0	6.46e-05	0	0.000145316	0.00046824	0	0	0	0	0	8.07e-05	0.000193755	0	0	0.000145316	0	0	0	0.000145316	0	0	0.00188911	0	0	0	0	9.69e-05	0	0	0	0.000839603	0.000548971
ASV178	0	0	0	0	0	0	0	0	0	3.23e-05	0	0	0	0	0	0	0	0	0	0	0	0	0	0	0	0	0	0	0	0.000419802	0	0	0	0	0	0	0	0	0	0	0	0.0015016	0	0	0	0	0	0.000322924	0.000177608
ASV179	0.000209901	0.00012917	0.000113024	0.00012917	0.000161462	0.00059741	0.000516679	0.000500533	0	0.00012917	8.07e-05	0.000274486	0.00046824	0.00085575	0.00825072	0.00411729	0.00143701	0.00232506	0.000177608	0.00100107	0.00185681	0.000888042	0.00046824	0	0.00119482	0.00012917	0.000629703	0.00106565	0.000920335	0.000936481	0.0025511	9.69e-05	0.000226047	0	0.00159848	0.000226047	0.0021313	0.00177608	0.000823457	0.000791165	0.0030032	0.00398812	0.000226047	0.00046824	6.46e-05	0.000242193	8.07e-05	0.000661995	0.00311622
ASV180	0	0	0	0.00592566	0	0	0	0	0.000419802	0.0104466	0	0	0	0	0	0	0	0	0	0	0	0	0.00072658	0	0.00330998	0	0	0	0	0.00046824	0.0360384	0.000355217	0.000274486	0	0	0	0	0	0	0	0	0	0.00117867	0	0	0	0	0	0
ASV181	0.00138857	0	0	4.84e-05	0	0	0	0.00114638	0.000242193	0	0	0	0.000242193	0.0214745	0.00435948	0.000435948	0.000226047	0.000161462	0.000113024	0	0.00235735	0.000920335	0.000209901	3.23e-05	0	0.00423031	0.000145316	0.000113024	0	0.00012917	0.00012917	0.0103336	0.000516679	8.07e-05	0.000452094	0.000145316	0.000435948	0	0.000339071	0.000807311	0	0.000516679	0.000161462	0.000629703	0	0.00135628	0	0.000113024	0.0019214
ASV182	0.00116253	0	0	0	0.00703975	0.00184067	0	0.000500533	0.00174379	0.000565118	0.00423031	0.000742726	0.00124326	0.000952627	0.0023412	0.000984919	0.00182452	0.000548971	0.000565118	0.000532825	0.000645849	0.00059741	0.000888042	0.000290632	0.00100107	0.000209901	0.000758872	0.00100107	0.00155004	0.00025834	0	0.000371363	0.000452094	0	0	0.000888042	0.000952627	0.00101721	0.000920335	0.00161462	0.000807311	0.000775019	0.00106565	0.000839603	0.000645849	0.00085575	0	0.00100107	0.00164691
ASV183	0	0	0	0	0	0	0	0	0	0	0	0.000936481	0	0	0	0	0	0	0	0	0	0	0	0	0	0	0	0	0	0	0	0	0	0	0	0	0.00059741	0	0.0131753	0.00237349	0.00797623	0	0	0	0	0.00518294	0.0259793	0	0
ASV184	0.0025511	0.00106565	0.000613556	0.000904188	0.0010818	0.000226047	0.00114638	0.00174379	0.000839603	0.0012917	0.00209901	0.00306778	6.46e-05	0	0.00025834	0.000113024	0	3.23e-05	0.000306778	0.000177608	0.00012917	0.000226047	3.23e-05	4.84e-05	6.46e-05	8.07e-05	0.00012917	4.84e-05	0	0.000242193	0.000193755	0.000145316	0.00122711	0.000339071	0.00121097	0.000403656	0.00012917	8.07e-05	6.46e-05	0.000226047	0.000484387	0.000322924	0.00012917	0.000678141	0.000694287	0.00072658	0.00293861	0.00134014	0.000209901
ASV185	0	0	0	0	0	0	0	0	0	0	0	0	0.00389124	0.0036329	0.00565118	0	0.0091872	0.00113024	0.00145316	0.00986534	0.00461782	0.00293861	0.00200213	0.0101883	0.000629703	0.000516679	0	0	0.00256725	0	0	0	0	0	0	0	0	0	0	0	0	0	0	0	0	0	0	0	0
ASV186	0	0	0.000274486	0	0	0	0	0	0.00196984	0	0	0	0.000387509	0.000242193	0.000177608	0.000161462	0.000839603	0.000145316	0.000145316	0.000145316	0.000177608	0.000209901	0.0556722	0	0	0	0	0	6.46e-05	0	0	0	0	0	0	8.07e-05	0	0	0	0	0	0	0	0	0	0	0	0	0
ASV187	0	0.000193755	0	0.000161462	0.000274486	0.000177608	0.000290632	0.000387509	0.000177608	0.000209901	0.000113024	0.000274486	0.00295476	0.00203442	0.00334227	0.00595796	0.00356831	0.000565118	0.00117867	0.00395582	0.00930022	0.00324539	0.00140472	0.00238964	0.00179223	0.000710434	0.000500533	0.000823457	0.00188911	0.000403656	0	0.00012917	0.00046824	0.000484387	0.00187296	1.61e-05	0	0	6.46e-05	0	0.000274486	0.00109794	0.00012917	0.000435948	0.000322924	0.000613556	0	8.07e-05	8.07e-05
ASV188	0.000548971	0.0019214	0.00116253	0	0	0.000678141	0.00172765	0.000661995	0.00130784	0.00130784	0.00271257	0	0.000581264	0.00106565	0.000888042	0.000226047	0.00012917	0.00148545	0.00148545	1.61e-05	0.000339071	0.00272871	0.000484387	0.000629703	0.000645849	0.00012917	1.61e-05	0.000452094	0.00159848	0.00012917	0.00109794	0.0032131	0.000242193	0.00205057	0.00113024	0.000193755	0.000888042	0.000355217	0.00190525	0	0.000952627	0.000403656	0.000339071	0.002761	0.00130784	0.000177608	0.00469855	0.000435948	0.00372978
ASV189	0	0	0	0	0.00179223	0	0	0	0	0	0.000904188	0	0	0	0	0	0	0	0	0	0	0	0	0	0	0	0	0	0	0.00760487	0	0	0	0	0	0.000920335	0.000452094	0	0.0238964	0.000500533	0	0.000775019	0.000226047	0	0.000968773	0.000742726	0	0	0.000532825
ASV190	0	0	0.00116253	0	0	0	0	0.00175994	0.00138857	0	0	0	0	0	0	0	0	0	0	0	0	0	0	0	0	0	0	0	0	0	0	0	0	0	0	0	0	0.000952627	0	0	0	0	0	0	0	0	0	0	0
ASV191	0.000226047	0	3.23e-05	0.000209901	0	0.00200213	0.000226047	0.000161462	0	0	0	0.000758872	0.00100107	0.000435948	0.00146931	0.0025511	0.000791165	0.00250266	0.00046824	0	0.000500533	0.000500533	0.00121097	0.0012917	0.00169535	0.00214745	0.00261569	0	0.000936481	0.000920335	0	0.00177608	0.000177608	0	0.000775019	0.000322924	0.000968773	0.00563503	0.000742726	0.0010818	0	0	0.00012917	0.00100107	0.000435948	0.000403656	0.000177608	0.000435948	0.00114638
ASV192	0	0	0.00046824	0.00376207	0.000355217	0.00025834	0.00140472	0	0.000984919	0.0399457	0.000565118	0.000435948	0	0	8.07e-05	0	0	0	0	0	0.00699131	0.000419802	0	0	6.46e-05	0	0	0	0	0	0	0	0	0	0	0	0	0	0	0	0	0	0.00085575	0	0	0	0	0	0
ASV193	0	0.00369748	0	0	0.00398812	0.000339071	0.00153389	0	0.000387509	0	0.00308393	0.000113024	0.000145316	0.00448865	0.000775019	0.000339071	0.00106565	0.00248652	0	0.00266413	0.00161462	0	0.000274486	0.00542513	0.000984919	0.000290632	0	0	0	0.000548971	0.000226047	0.000661995	0.00356831	0	0	0.00219589	0	0	0.000193755	0.00418187	0.00145316	0.00012917	0	0	0.000339071	0.00163077	0.00169535	0.000322924	0.000113024
ASV194	8.07e-05	0	0	0	0	0	0	0	0	0	1.61e-05	0	0.000226047	0.00519908	0.000355217	0.000387509	0.000113024	0	8.07e-05	0.0433042	0.000193755	0	0.000145316	0	0	8.07e-05	0.000161462	0	0	0	0	0	0	1.61e-05	0	0	0	0	0	0	0	0	0	0	0	0	0	0	0
ASV195	0	0.000904188	0.00072658	0	0	0	0	0	0	0	0.000758872	0	0.000758872	0	0	0	0	0	0	0	0.000968773	0.00103336	0	0.00114638	0.000710434	0	0	0	0	0	0.000710434	0.000565118	0	0	0	0	0.00184067	0.00389124	0.000807311	0	0	0.00151775	0	0.000839603	0	0	0	0.00253496	0.00285788
ASV196	0	0.0265282	0	0	0	0	0.0121097	0.00251881	0	0	0	0	0	0	0	0	0	0.000484387	0	0	0	0	0	0.00849291	0	0	0	0	0.000113024	0	0	0	0	0	0	0.000226047	0	0	0	0	0	0.00187296	0	0	0	0	0	0.000968773	0
ASV197	0.000113024	0	0.00085575	0	0.0015016	0	0	0	0.000548971	0	0.000920335	0	0.000452094	0.00947783	0	0	0	0.00340685	0	0	0	0	0	0.000839603	0	0.00481157	0.00143701	0	0.00201828	0	0	0.00452094	0.00308393	0	0.00130784	0	0	0	0	0	0	0.00435948	0	0.000791165	0	0	0	0.01148	0
ASV198	0.00280944	0	0.0131592	0.0010495	0.00733038	0.00350373	0	0.00413343	0.00652307	0.00174379	0.00334227	0.00460167	0	0	0	0	0	0	0.000548971	0	0	0	0	0	0	0	0	0	0	0	0	0.00072658	0.000904188	0	0	0.00156618	0	0	0.0012917	0	0	0	0	0	0	0	0	0	0
ASV199	0.000113024	0	0.000613556	0.00805696	0.000161462	0	0	0	0.000355217	0.000565118	0.000177608	0	8.07e-05	4.84e-05	0.00012917	4.84e-05	6.46e-05	3.23e-05	0	0	0	0	0	0	0	0	0	0	0	0	0	0	8.07e-05	0.000888042	0	0.000322924	0.000452094	0.000226047	0.000807311	0.00211516	0.00187296	0.000581264	0.000387509	0	0.00156618	0.0173895	0.00904188	0.000742726	0.00025834
ASV200	0.0010818	0	0.00486001	0.00172765	0.00142087	0	0.000290632	0.00116253	0.00187296	0.00124326	0.00113024	0	0.000209901	0.000371363	0.00109794	0.000113024	0.000113024	8.07e-05	6.46e-05	0.000161462	0	0.000209901	0	0.000661995	0.000936481	0.00025834	0.00100107	0.00134014	0.00072658	0.00221203	0	0	0.00121097	0.000629703	0.000742726	0.00636161	0.000322924	0.000274486	0.000500533	0.00138857	0.00124326	0.00159848	0.000113024	0.00059741	0.000920335	0.00292247	0.00237349	0.000710434	0
ASV201	0.000565118	0	0.00151775	0.00293861	0	0	0	0.000871896	0	0	0	0	0.000775019	0.000532825	0.000823457	0.00101721	0.000775019	0.00227662	0	0	0.000516679	0.000161462	0	0.00116253	0.00072658	0.00175994	0.00350373	0.00385895	0.00217974	0.00100107	8.07e-05	0.00046824	0	0.000484387	0.00114638	0.00121097	0.00410114	0.000678141	0.000435948	0.000645849	0.00421416	0.000209901	0	0	0	0.000613556	0	0.000435948	0.000403656
ASV202	0	0	0	0	0	0	0	0	0	0	0	0	0.00330998	0.0104628	0.000355217	0.000355217	0.000242193	0	0.00800853	0.024849	0.000339071	0.000387509	0.000193755	0	0	0.000274486	0	0	0	0	0	0	0	0	0	0	0	0	0	0	0	0	0	0	0	0	0	0	0
ASV203	0	0.00116253	0	0	0	0.00155004	0	0	0	0	0.000290632	0.000306778	0.00100107	0	0	0	0	0	0.000613556	0	0	0	0	0	0	0.000226047	0.00259954	0.000839603	0.00594181	0.0152905	0	0.00085575	0.0010818	0.00130784	0	0.00518294	0.00109794	0.00439177	0.00109794	0.000807311	0	0.000791165	0	0.000435948	0.000516679	0.000322924	0	0.000209901	0
ASV204	0	0	0	0	0	0	0	0	0	0	0	0	0	0.000242193	0.000339071	0.000274486	0.00012917	0.000177608	0	0	0.0495043	0.000193755	0	0	0	0	0	0	0	0	0	0	0	0	0	0	0	0	0	0	0	0	0	0	0	0	0	0	0
ASV205	0	0	0	0	0	0.010818	0	0	0	0	0	0.00466626	0	0	0	0	0	0	0	0	0	0	0	0	0	0	0	0.0308554	0	0	0	0	0	0.00329383	0	0	0	0	0	0.00226047	0	0	0	0	0	0	0	0	0
ASV206	3.23e-05	0	0.000161462	0.000177608	9.69e-05	0	0.000193755	3.23e-05	0.000177608	0.000290632	0.00025834	3.23e-05	0.000193755	0.000581264	0.000274486	0.00190525	0.00274486	0.00544128	0.000226047	0.000306778	0.00224433	0.00103336	0.00156618	0.00749185	0.00025834	0.000435948	9.69e-05	0	0.000322924	0	0.000339071	0.000306778	0.00046824	0	0.000209901	0.00025834	0.000775019	0.000904188	0.000532825	0.000113024	0.000355217	0.000209901	6.46e-05	0.00209901	0.000339071	0.000274486	0.00269642	0.000226047	0.000419802
ASV207	0.00111409	0.00552201	0.000387509	0.00466626	0.000548971	0.000629703	0.000791165	0.00148545	0.000548971	0.00340685	0.0025834	0.000678141	0.000387509	0.00237349	0.000629703	0.00111409	0.000661995	0.000565118	0	0.000984919	0.000694287	0.00206672	0.000419802	0.000387509	0.00164691	0.000226047	0.000113024	0	0	0.000435948	0.0015016	0.00155004	0	0.000823457	0	0.000823457	0.000387509	0.000355217	0.00059741	0	0.000339071	0.000791165	0.000565118	0.000823457	0	0	0	0.000403656	0.0015016
ASV208	0	9.69e-05	0	0.00238964	0	0	0	0.000339071	0.00012917	0.00127555	0.000290632	0.00046824	0.000500533	0.000581264	0.00137243	0.00111409	0.000452094	0.000177608	0.000290632	0.000355217	0.000936481	0.000758872	0.000403656	0.000209901	0	0.000532825	0.000274486	0.00119482	0.000193755	0.000936481	0.000452094	0.00184067	0.000500533	0.00313237	0	0.00163077	0.000968773	0.000290632	0.000226047	0.000274486	0.00159848	0.00184067	0.00124326	0.00109794	0.000339071	0.000984919	0.00184067	0.00293861	0.00122711
ASV209	0	0	0	0	0	0	0	0	0	0	0	0	0	0	0	0	0	0	0	0	0	0	0	0	0	0	0	0	0	0.0010495	0	0.00025834	0	0	0	0	0	0	0	0	0	0.00261569	0	0	0.000419802	0	0	0.000484387	0.000500533
ASV210	0.000371363	0	0.0010495	0.000452094	0.000936481	0	0	0.00568347	0	0	0.00135628	0	0.00155004	0	0.000355217	0	0.000339071	0	0	0.00589337	0.000532825	0.000371363	0.000161462	0	0.000548971	0	4.84e-05	0	9.69e-05	0	0	0	0	0	0.00913876	0.000807311	0	0	0	0	0.00059741	0	0	0	0	0	0	0.00175994	0
ASV211	0	0	0	0.0134821	0.000355217	0.000242193	0.000145316	0.00379436	0.000209901	0.0255433	0	0.000113024	0.000161462	0	0.000193755	0	0	0.00012917	0	0	0	0.000209901	0.000290632	0.00114638	0	0	0	0	0	0	0	0.000145316	0	0.00106565	0	0	0	0	8.07e-05	0	0	3.23e-05	0	0	0	0	0.000371363	0	0.000629703
ASV212	0	0	0	0	0	0	0	0	0	0	0	0	0	0	0	0	0	0	0	0	0	0	0	0	0.000710434	0	0	0	0	0	0.0457422	0.000435948	0	0.000290632	0	0	0	0	0	0	0	0	0.00130784	0	0	0	0	0	0
ASV213	0	0	0	0	0	0	0	0	0	0	0	0	0	0	0	0	0	0	0	0	0	0	0	0	0	0	0	0	0	0	0	0	0	0	0	0	0	0.000839603	0	0	0	0	0.00101721	0	0	0	0	0	0
ASV214	0	0	0	0	0	0	0	0	0	0	0	0	0	0	0	0	0.000274486	0	0.000226047	0	0	0	0.00012917	0	0	0	0	0	0	0.00368134	0	0	0	0.000355217	0.00636161	0.00545742	0	9.69e-05	0	0.00631317	0.0130461	0.000339071	8.07e-05	0.000322924	0.000322924	0.0089773	0.00177608	0.000226047	0
ASV215	0	0	0	0	0	0.000661995	0	0	0.000113024	0	0.00012917	0	0	0	0	0	0	0	0	0.000113024	0	0	0	0.0422062	0.000484387	0.000209901	0.000193755	0	0.000500533	0	0	0	0	0	0	0	0.000113024	0.000339071	0	0	0	0	0	0	0	0	0	0	0.00146931
ASV216	0.000355217	0.00025834	0.000161462	0	0.00025834	0	0	0.000371363	0	0.00012917	0.000322924	0.000355217	0	0	0	1.61e-05	0	0.000193755	0	0	0	0	0	0.0140472	0	0	0.000742726	0	0	0	0	0	0.00332612	0.00025834	0	0.000387509	0.00797623	0	0	0	9.69e-05	6.46e-05	0	0	0.000193755	0.000226047	0.00195369	0.00561888	0.000387509
ASV217	0	0	0	0	0	0	0	0	0	0	0	0	0	0	0	0	0	0	0	0	0	0	0	0	0	0	0	0	0	0	0	0	0	0	0	0	0.000968773	0	0	0	0	0	0	0	0	0	0	0.00025834	0.0424969
ASV218	0	0	0.000661995	0	0	0	0	0	0	0	0	0	0.00889657	0	0.0131753	0	0	0	0.00369748	0	0.0114315	0	0.00025834	0	0	0	0	0	0	0	0	0	0	0	0	0	0	0	0	0	0	0	0	0	0	0	0	0	0
ASV219	0	0	0	0	0	0	0	0	0	0	0	0	0	0	0	0	0	0	0	0	0	0	0	0	0	0	0	0	0	0	0	0	0	0	0	0	0	0	0	0.00132399	0	0	0	0	0	8.07e-05	0	0	0
ASV220	0	0	0	0	0	0	0	0	0	0	0	0	0.0296929	0.000645849	0.00531211	0	0	0	0.00529596	0.000274486	0.00106565	0.000629703	0.000775019	0	0.000952627	0.000565118	3.23e-05	0	0	0	0	0.000516679	0	0	0	0	0	0	0	0	0	0	0	0	0	0	0	0	0
ASV221	0	3.23e-05	0	0	4.84e-05	0.000113024	0.00146931	0.000145316	0.00012917	0	8.07e-05	0.000113024	0.000661995	0.00025834	0.00117867	0.00046824	0.000290632	9.69e-05	0.0012594	0	0	4.84e-05	4.84e-05	0	4.84e-05	0	6.46e-05	0.000145316	0	0	0.000274486	0.000661995	0	8.07e-05	0	0.0298382	0.000226047	0.000113024	0.000193755	0.000274486	0.000484387	0.0010818	0.000242193	0.00059741	0.000355217	0.000532825	0.000193755	0.00195369	0.000177608
ASV222	0	0	0	0	0	0	0	0	0	0	0	0	0	0	0	0	0	0	0	0	0	0	0	0	0	0	0	0	0	0	0	0	0	0.014241	0	0.0172926	0	0	0.000419802	0	0	0.00025834	0.00046824	0	0.000355217	0	0	0	0
ASV223	0	0	0	0.00372978	0.00132399	0.00121097	0.000968773	0.00232506	0.00214745	0.00163077	0.00182452	0.00169535	0	0	0	0	0	0	0	0	0	0	0	0	0	0	0	0	0	0.00629703	0	3.23e-05	0	0	8.07e-05	0	0	8.07e-05	0	0	6.46e-05	0.0127071	0	0.00012917	0	0	0	0	0
ASV224	0	0	0	0.000871896	3.23e-05	0	0	0	0	0.00857364	6.46e-05	8.07e-05	0	0	0	0	0	0	0	0	0	0	0	0	0	0	0	0	0	0	0	0	0	3.23e-05	0	0	0	0	0	0.00113024	0	0	0	0	0	0	0	0.000419802	0.000274486
ASV225	0	0	0.0218781	0.000661995	0.00295476	0	0.00179223	0.00155004	0.0141441	0.000823457	0	0	0	0	0.00100107	0	0	0	0	0	0	0	0	0	0	0	0	0	0	0	0	0	0	0	0	0	0	0	0	0	0	0	0	0	0	0	0	0	0
ASV226	0	0	0	0	0	0	0	0	0	0	0	0	0	0.00059741	0	0	0	0	0	0	0	0	0	0	0	0.00984919	0	0	0	0.000484387	0	0.0296606	0.000242193	0.0012917	0	0	0	0	0	0	0	0	0	0.000904188	0	0	0	0	0
ASV227	0	0	0	0	0.000274486	0.000193755	0	0	0	0	0	0	0	0	0	0	0.00460167	0.00221203	0	0	0	0.000678141	0.000581264	0	0	0.00195369	0	0.00172765	0	0.00624859	0.0010818	0.000888042	0	0	0	0.003423	0.00347144	0.00117867	0	0	0.00347144	0	0	0	0	0	0	0.0010495	0.000904188
ASV228	0.00100107	0.00195369	0.00153389	0	0.00376207	0.00208286	0.00100107	0.000678141	0.000888042	0.000516679	0.00219589	0.000871896	0.00135628	0.00046824	0.00268027	0.000758872	0.00201828	0	0.000387509	0.000355217	0.000532825	0.000387509	0.000613556	0.000435948	0.000904188	0.000274486	0.000645849	0.00121097	0.00151775	0	0.000452094	0	0	0.000500533	0.000290632	0	0.000516679	0.000548971	0.000500533	0.000807311	0.000435948	0.000387509	0.000532825	0	0.000387509	0.000226047	0.000322924	0.000645849	0.000484387
ASV229	0	0	0	0	0	0	0	0.000484387	0	0.000274486	0	0	0.000306778	0.00101721	0.00135628	0.000871896	0.00122711	0.000290632	0.000274486	0.000242193	0.00251881	0.0204411	0.000274486	0	0.000226047	0.000177608	0	0	0.00900959	0	0	0.000209901	0	0	0.000322924	0	0	0.00175994	0	0.00012917	0	0	0	0.00437563	0	0	0	0	0
ASV230	0	0	0	0	0	0	0	0	0.000177608	0	0	0	0	0	0	0	0	0	0	0	0	0	0	0	0	0	0	0	0	0	0	0	0	0	0	0.000694287	0	0	0	0	0	0	0	0	0	0	0.000290632	0.000904188	0
ASV231	0	0	0	0	0	0	0	0	0	0	0	0	0.00151775	0	0	0	0	0	0	0	0	0	0	0	0.0428198	0	0.000226047	0	0.000548971	0	0	0	0	0	0	0	0	0	0	0	0	0	0	0	0	0	0	0	0
ASV232	0.000113024	0.00169535	0.000113024	0.000161462	0	8.07e-05	0.000548971	0.000242193	0.00012917	0.000290632	0.000306778	6.46e-05	0.000145316	0.000161462	0.000645849	0.000113024	0.000904188	0	0.000145316	0.000113024	0.00122711	0.000290632	0.000355217	0	9.69e-05	3.23e-05	0	0.000274486	0.000113024	0.000952627	0.000290632	0.000355217	6.46e-05	0	0.000193755	0.000629703	0.000177608	0	0.000339071	0	0.0226047	0.000548971	0.000161462	0.00025834	0.000209901	0.000403656	0.00479543	0.000775019	0.000791165
ASV233	0	0	0	0	0	0	0	0	0	0	0	0	0	0.00106565	0	0.00025834	0	0	0	0	0	0.000161462	0	0	0	0	0	0	0	0	0.000419802	0	0	0	0	0	0	0.00114638	0	0	0	0	0	0	0	0	0	0	0.000274486
ASV234	0.000532825	0.00938095	0	0	0.000484387	0	0.00376207	0.000548971	0	0	0.00137243	0	0.00175994	0	0	0	0	0.000710434	0	0	0	0.00072658	0	0.00127555	0	0	0	0.00113024	0	0.000952627	0	0	0	0	0	0.000516679	0	0	0	0.00578035	0.000403656	0	0	0.000904188	0	0.000403656	0	0	0
ASV235	0	0.00100107	0	0	0	0.000581264	0	0	0	0	0.000322924	0.000435948	0	0.00177608	0.000306778	0.000177608	0.00137243	0.000177608	0.000209901	0.000371363	0.000193755	0.000177608	0.000565118	0.000371363	0	0.000661995	9.69e-05	0.000209901	0.000452094	0.000984919	0.00322924	0.00944554	0.000904188	0.00353602	0	0.00445636	0.000387509	0.000193755	0.000661995	0	0.000548971	0.000322924	0.000500533	0.0012917	0.000177608	0.000823457	0.00072658	0.000742726	0.0012917
ASV236	0.00193755	0.00308393	0.00818613	0.00145316	0.00458553	0.00272871	0	0	0.00921949	0	0.0038428	0.0030032	0	0	0	0	0	0	0	0	0	0	0	0	0	0	0	0	0.00196984	0	0	0	0	0	0	0.00153389	0	0	0	0	0	0	0	0	0	0	0	0	0
ASV237	0	0.00209901	0.00106565	0	0.00641005	0.00238964	0.000678141	0.00059741	0.000904188	0	0.00203442	0.00103336	0.00121097	0.000888042	0.0021313	0.000500533	0.00117867	0.000581264	0.000290632	0.000548971	0.000678141	0.000661995	0.000419802	0.000339071	0.000581264	0	0.00059741	0.000871896	0.000823457	0.000209901	0.000274486	9.69e-05	0.000209901	0	0	0.000629703	0.000419802	0.000839603	0.000484387	0	0.000500533	0.000645849	0.000742726	0.000710434	0.000629703	0.000403656	0.000306778	0.000419802	0.000661995
ASV238	0	0	0	0	0	0	0	0	0	0	0	0	0	0	0.000387509	0	0.000807311	0	0	0	0	0	0	0.000306778	0.000193755	0.000145316	0.00536055	0	0.0359576	4.84e-05	0	0	0.00337456	0	0.000791165	0	0	0	0	0	0	0	0	0	0.000145316	0	0	0	0
ASV239	1.61e-05	0	4.84e-05	0	0	0	0	0	0.000419802	0	0	0	0	0	0	0	0.00114638	0	0	0	0	0	0	0.00059741	0.00046824	0.000161462	8.07e-05	0	0.0445797	0	0	0	0	0	0	0	0	0	0	0	0	0.00111409	0	1.61e-05	0	3.23e-05	0	0.00012917	0
ASV240	0.0229599	0.00253496	0.000306778	0.000322924	0.00113024	0	0.00511835	0.0101237	0.000419802	0.000242193	0.000339071	0.000306778	0	0	0	0	0	0	0	0	0	0	0	0	0	0	0	0	0	0	0	0	0	0	0	0	0	0	0	0	0	0	0	0	0	0	0	0	0
ASV241	0	0	0	0	0	0	0	0	0	0	0	0	0	0	0	0	0	0.000209901	0.0042626	0	0.00253496	0.0349243	0	0	0	0	0	0	8.07e-05	0	0	0	0	0	0	0	0	0	0	0	0	0	0	0	0	0	0	0	0
ASV242	0.000694287	0.00775019	0.000177608	0	0.000904188	0.000193755	0.000807311	0	0.000710434	0.0012917	0.00928408	0.000339071	0.000274486	0.000226047	0.00072658	0	0.000209901	0	0.000452094	0	0.0012917	0	0.000371363	0	0	0	1.61e-05	0	0	0.000161462	0	0	0.000452094	8.07e-05	0	0.0021313	0.000161462	0.000548971	0.000290632	0.000452094	0.000629703	0.00142087	0	0.000516679	0.000532825	0.000371363	0.000322924	0.00187296	0.000274486
ASV243	0.000807311	0	0	0	0.000920335	0	0	0.000452094	0	0	0	0	0.000678141	0.00072658	0.000242193	0	0.000936481	0	0.000290632	0	0	0	0.000242193	0.000775019	0.00138857	0.0133691	0.00072658	0.00184067	0.000710434	0.00221203	0	0.000936481	0.000452094	0	0	0.00101721	4.84e-05	0.0042626	0.000177608	0	0	0.000565118	0	0	0.000113024	0.000306778	0.000177608	0.000209901	4.84e-05
ASV244	0.00117867	0.00310007	0.000419802	0.00132399	0	0.000888042	0.00072658	0.00116253	0.00109794	0.00151775	0.00237349	0	0.00046824	0.00130784	0.000871896	0.000500533	0.000387509	0	0.000516679	0	0.000452094	0.00198599	0.000791165	0.000500533	0.000548971	0	0	0.00046824	0.000403656	0	0.000484387	0.000823457	0.000177608	0.00243808	0.000193755	0.00156618	0.000710434	0	0.000742726	8.07e-05	0.000209901	0.000565118	0.000355217	0.000742726	0.000403656	0.000403656	0.00059741	0.000904188	0.00158233
ASV245	0	0.000274486	4.84e-05	0	0	0.000193755	0	0.000274486	0.000145316	0.000355217	0	0.000532825	0.000387509	0	0.000306778	0.000355217	0	0.000161462	0	6.46e-05	0.000452094	0.000742726	0.000242193	0.000371363	0.000161462	0	9.69e-05	0.00012917	0.000791165	0.000209901	0.000193755	0.000274486	0	0.000661995	0	0.00059741	0.000823457	0.00289017	0.000888042	0.00335841	0.00163077	0.00203442	0.000274486	0.0012594	0.00127555	0.000920335	0.00190525	0.00227662	0.00392353
ASV246	0	0	0	0	0	0	0	0	0	0	0	0	0	0	0	0	0	0	0	0	0	0	0	0	0	0	0	0	0	0	0	0	0	0	0	0	0	0	0	0	0	0	0	0	0	0	0	0	0.000661995
ASV247	0	0	0	0	0	0	0	0	0	0	0	0	0.000355217	0	0	0	0.000226047	0.000371363	0	0	0	0	0	0	0	0.000177608	0	0	0	0.0237672	0	0	0.000113024	0.000403656	0	0.0108341	0	0	0	0	0	0.000581264	0	4.84e-05	6.46e-05	0	0	0	0
ASV248	0	0	0	0.0124487	0	0	0	0	0	0.0267866	0	0	0	0	0	0	0	0	0	0	0	0	0	0	0	0	0	0	0	0	0	0	0	0	0	0	0	0	0	0	0	0	0	0	0	0	0	0	0
ASV249	0.000452094	0.0187296	0.000209901	0	0.000339071	0.000290632	0.00274486	0.00248652	0.000145316	0	0.00012917	9.69e-05	0	0	0	0	8.07e-05	0	0	0	0	0	0	0	6.46e-05	0	0	0.000871896	0	0.000371363	0	0	0	0.00251881	0	0.00326154	0	0.000209901	0.000226047	4.84e-05	0	9.69e-05	0	6.46e-05	0	0.000145316	3.23e-05	0.000161462	0.000290632
ASV250	0.000355217	0	0	8.07e-05	0.000355217	0.000274486	6.46e-05	0.000871896	0.00012917	0.000113024	0.000565118	0.00117867	6.46e-05	0	0.000145316	0	0.000242193	0.000177608	0	0	0	0	0	0	0.000322924	0	0.00113024	0.000161462	0.000161462	0	0.000371363	0	0.00531211	0.000629703	8.07e-05	0.000145316	0	0	0.0010818	0.000193755	0.00012917	0.000920335	0	0.000435948	0.000742726	0.000290632	0	0.000645849	0.000274486
ASV251	0.000371363	0	0	0	0	0	0	0.00134014	0.000775019	0.00175994	0.000177608	0.00303549	0.000629703	0.0010495	0	0	0.000984919	0.00280944	0	0	0.000161462	0.000920335	0.00143701	0.000936481	0.00611942	0	0	0	0	0.00116253	0	0.000290632	0	0	0.000209901	0.00733038	0.000322924	0.00100107	0.000274486	0.000306778	0.000516679	0.00153389	0	0.000274486	0.000161462	0.00025834	0	0.00059741	0.00143701
ASV252	0	0	0	6.46e-05	0	0	4.84e-05	8.07e-05	0	0	8.07e-05	0.000161462	0.000226047	0.000209901	0.000177608	0.026173	0.00155004	4.84e-05	0	0.00012917	8.07e-05	0.00311622	0.00187296	0.000904188	0.000371363	4.84e-05	0	0	0.00103336	0	0	0	0	0	0	0	0	0	0	0	0	0	0	0	0	0	0	0	0
ASV253	0	0	0	0	0	0.00201828	0	0.00917105	0	0.000403656	0	0.000694287	0	0	0	0	0	0	0	0	0	0	0	0.000500533	0	0	0	0	0	0	0	0	0	0	0	0.000322924	0.000177608	0.000694287	0.00510221	0	0.000500533	0	0.000306778	0.000629703	0	0	0	0.0076856	0.00137243
ASV254	0	0	0.000242193	0	0.00269642	0	0	0	0	0	0.000274486	0	0.0025834	0	0.00100107	0.00807311	0	0.000904188	0.000339071	0	0.000435948	0.00626473	0	0.000694287	0.000532825	0	0.00292247	0	0.000516679	0	0	0	0.00085575	0	0	0	0	0	0.000839603	0.00343914	0.000984919	0.0015016	0	0.000274486	0	0.000710434	0	0.000484387	0.000613556
ASV255	0	0.00113024	0	0	0	0	0	0.000807311	0	0.0010818	0	0	0.000565118	0	0.00072658	0	0	0	0.0010818	0.00100107	0.00495689	0.00272871	0.000904188	0.00200213	0	0	0	0	0	0	0	0	0	0	0	0.0015016	0.000952627	0.00172765	0.000710434	0	0.000645849	0.00106565	0	0.00237349	0	0	0.00106565	0.00124326	0.00263183
ASV256	0.00101721	0	0	0	0.000209901	0.00174379	0.000145316	0.00329383	0	0	0.00012917	0.00374592	0	0	0.000274486	0	0	0.0170827	0.000145316	0	0	0	0	0.0102851	0.000290632	0	0	0	0.00012917	0	0.000306778	0	0	0	0	0	0	0	0	8.07e-05	0	8.07e-05	0	0	0	0.000161462	0	0	0
ASV257	9.69e-05	0.00012917	0	0	0	0	0	6.46e-05	0	0	0	0	0	0	0.000984919	0	0	0	0	0	0	0	0	0	0	0	0	0.000435948	0	0	0.00198599	0	0.000113024	0	0	4.84e-05	0.000161462	0	0	6.46e-05	1.61e-05	0.000193755	0.0275777	0.000193755	0.000161462	0.000145316	0	9.69e-05	0.00169535
ASV258	0	0	0	0	0	0	0	0	0	0	0	0	0	0	0	0	0	0	0	0	0	0	0	0	0	0	0	0	0	0	0	0	0	0	0	0	0	0	0	0	0	0	0	0.000613556	0	0	0	0.00025834	0.000193755
ASV259	0	0.000807311	0.00111409	0	0.00106565	0	0.000968773	0	0	0.000242193	0	0	0.0032131	0	0	0	0.00526367	0	0	0	0	0	0.000920335	0	0	0	0	0	0.00277715	0	0.00177608	0	0	0	0.000226047	0	0	0	0.00395582	0	0.00573191	0	9.69e-05	0	0.000984919	0	0.00193755	0	0
ASV260	0.000193755	0	0	9.69e-05	0	0	0.00883198	0.000968773	0.000548971	0.000645849	0	0	0.00012917	0	0.000355217	0	0.000290632	0.00473084	0	8.07e-05	0	0.0134982	0.000387509	0.000645849	0.000823457	0	0	0.000355217	0	0	0	0	0.00012917	0.0051345	0	0	0	0	0	0	0	0	0	0	0	0	0	0	0
ASV261	0.000209901	0.000532825	0.000209901	0	0.000742726	0.00395582	0.00072658	0.000968773	0.000339071	0.000355217	0	0.00374592	0.000161462	0.000387509	0.000452094	0	0	0	0	0.000193755	0.00046824	0.000952627	0.000274486	0	0.000435948	8.07e-05	0	0	0	0	0.000177608	0	0.000387509	0.00439177	0.000435948	0.000209901	0.000613556	0.00135628	0.000888042	0.000161462	0.000290632	0.000339071	0.000193755	0.000371363	0.00729809	0.00132399	4.84e-05	0.000419802	0.000968773
ASV262	3.23e-05	6.46e-05	0	0.000242193	0	0.000322924	0.000145316	4.84e-05	9.69e-05	0.000290632	0.00025834	0	6.46e-05	0.00046824	0.000629703	0.000452094	9.69e-05	0.00689444	4.84e-05	0.000226047	0	0.000193755	0.000226047	0.000193755	0	0	0	0	0.000274486	0.000274486	8.07e-05	0	0.000113024	3.23e-05	0.00289017	0.00109794	0.000161462	0	0	0	0.000274486	0.000629703	4.84e-05	0	0	4.84e-05	0	0.000823457	0.00111409
ASV263	0	0.00046824	0	0	0.00155004	0.00266413	0	0.000161462	0	0	0.000758872	0	0	0	0	0	0	0	4.84e-05	0	0	0	0	0	0.000161462	0	0	0	0.00142087	0	0.000629703	0.00059741	0	0.000161462	0	0.00012917	0	0	0	6.46e-05	0.000355217	0	0	0	0	0.000177608	0	0.000226047	0.000242193
ASV264	0	0	0.0340847	0	0	0	0	0	0	0	0	0	0	0	0	0	0	0	0	0	0	0	0	0	0	0	0	0	0	0	0	0	0	0	0	0	0	0	0	0	0	0	0	0	0	0	0	0	0
ASV265	0	0.00124326	0	0.00116253	0	0.000823457	0.000645849	0.000371363	0.000629703	0	0.00072658	0.00072658	0.000387509	0.000177608	0.000403656	0	0.00109794	0.00085575	0	0	0.00589337	0.00222818	0.000403656	0.000823457	0.00046824	0.000177608	0	0	0.000484387	0.000161462	0	0.00142087	0	0.00205057	0.000387509	0.00201828	0.00059741	0.00135628	0.000387509	0.00111409	0.00145316	0.000678141	0.000355217	0.000775019	0	0.00100107	0.000758872	0	0.00100107
ASV266	0.000226047	0.000371363	0	0	0	0	0	0	0	0.00127555	8.07e-05	0	0	0	0	0	0	0.000322924	0	0	0	0	0	0	0	0	0	0	0	0	0.000177608	0	0.00101721	0	0	0	0.00707204	0.000532825	0.00429489	0.000484387	0.00476313	0.00330998	0.00203442	0.000435948	0.00177608	0	0	0.000355217	0.00111409
ASV267	0.000419802	0.000532825	0	0.000516679	0.000371363	0.00085575	0	0.000694287	0.000226047	0.000452094	0.00143701	0.000565118	0.000565118	0.00156618	0	0.000888042	0	0	0.00829916	0.00137243	0.000226047	0.000968773	0	0.000387509	0.000355217	0.00382665	0	0	0	0	0	0	0	0.00114638	0	0.00122711	0	0	0.000177608	0	0.000339071	0.000452094	0	0	0	0.00137243	0	0.000226047	0.00335841
ASV268	0	0	0	0	0	0	0	0	0	0.000403656	0	0.000484387	0.000339071	0.000387509	0	0	0	0	0.00046824	8.07e-05	0	4.84e-05	0	0	0	0	0	0.00242193	0	0.00134014	3.23e-05	0.00012917	0.000177608	0.00351988	0	0.00180838	0.00188911	0.00025834	8.07e-05	0.000161462	0.00122711	0.00836374	8.07e-05	0	0.00025834	0.000226047	0.00072658	0.00310007	0.000645849
ASV269	0	0	0	0.00272871	0.000403656	0.000113024	0	0	0	0.0010495	0	0	0	0.000113024	0	0.000484387	0	0	0	0	0	0.00271257	6.46e-05	0	0.000742726	0.000419802	0	0	0	0.000904188	0	0.00166306	0	0	0	0.000645849	0	9.69e-05	0.000355217	0.00540898	0.000145316	0.00209901	0	0.00025834	0.000290632	0.00179223	0	0.00180838	0
ASV270	0	0	0	0	0	0	0	0	0	0	0	0	0.000548971	0.00101721	0	0	0.0208932	0	0	0	0	0	0.0162915	0	0	0	0	0	0	0	0	0	0	0	0	0	0	0	0	0	0	0	0	0	0	0	0	0	0
ASV271	0	0	0	0	0	0	0	0	0	0	9.69e-05	0	0	0	0	0	0	0	0	0	0	0	0	0	0	0	0	0	0	0	0	0.000177608	9.69e-05	0	0	0.000678141	0.000322924	0.000403656	0.000419802	0.000322924	0.00114638	0.000322924	0.000177608	0.0040527	0.000807311	0.00155004	0.0175186	0.00292247	6.46e-05
ASV272	0	0	0.00247037	0	0	0.00059741	0	0.000758872	0.00135628	0	0.0021313	0	0	0	0.000661995	0	0	0	0	0	0.000807311	0	0	0	0.000678141	0	0.000193755	0.000532825	0.00114638	0	0	0	0.00025834	0.000387509	0	0.000403656	0.000419802	0.000839603	0.000920335	0.0012917	0.00209901	0.000758872	0.000565118	0.000645849	0.000823457	0.000968773	0.000823457	0.000484387	0.00113024
ASV273	0	0	0.00544128	0	0	0.00419802	0	0	0.00427875	0	0	0.00200213	0.000177608	0	0	0	0	0	0	0	0	0	0	0	0.00229276	0	0	0	0	0	0.000952627	0	0	0	0	0	0	0	0	0	0.0155488	0	0	0	0	0	0.00161462	0	0
ASV274	0	0	0	0	0	0	0.000419802	0.00106565	0.000177608	0	0	0	0	0	0	0	0	0	0	0	0	0	0	0	0	0	0	0	0	0	0	0	0.000161462	0	0	8.07e-05	0.000161462	0	0	0.000242193	0.000145316	0.000581264	0	0.000113024	0.0157749	0.00216359	0.0112862	0	0
ASV275	0	0	0.000339071	0	0.000532825	0.000242193	0	0	0	0.000290632	0.00132399	0	0	0	0	0	0	0	0	0	0	0	0	0.00025834	0	0	0	0	0.003423	0	0	0	0	0	0	0	0	0	0.00544128	0	0.00419802	0	0	0	0.00590952	0.000419802	0.000984919	0	0
ASV276	0.00106565	0.000306778	0.00238964	0.00124326	0.00626473	0.0101237	0.00339071	0.0017115	0.000629703	0.00116253	0.000613556	0.000387509	0.00146931	0.000435948	0.00025834	0	0.00085575	0	0.000145316	0.000161462	0	0	0	0	0.000274486	0	0.0012917	0.00103336	0	0	0	0	0.000548971	0	0	0.000387509	0	0	0	0	0.00046824	0	0	0	0	0	0	0	0
ASV277	0	0	0.00159848	0	0.000532825	0.000452094	0.000565118	0.00116253	0	0.0010495	0.000581264	0.00175994	0	0.00208286	0.000548971	0	0.00109794	0.000403656	0	0.00119482	0.000274486	0.000775019	0.000710434	0	0.000193755	0.000661995	0.00243808	0	0	0.00025834	0	0.00142087	0.00226047	0.000419802	0	0.000968773	0	0.000904188	0.000791165	0	0.000290632	0.000306778	0.00012917	0	0.00132399	0	0	0.00185681	0.000274486
ASV278	0.00012917	0	0.000242193	0	0	0	0	0.00140472	0.000694287	0	0	0	4.84e-05	4.84e-05	0.000177608	0	0	0.00119482	0	0	0	0	0	0.000161462	0	0.000226047	0	0	0.000242193	0	0.00012917	0	0	0.000387509	0	0.000435948	0	0.00012917	0	0.00329383	0.00805696	0.000145316	3.23e-05	8.07e-05	0.000274486	0.00117867	0.00495689	0	0
ASV279	0.000920335	0.00143701	0.000678141	0.00196984	9.69e-05	0	0.000371363	0.000161462	0.00046824	0.00046824	0	0	0.000290632	0.000339071	0	0.000419802	0.000661995	0.000306778	0	0.000161462	0	0.000339071	0	0	0.00012917	9.69e-05	0	0.000371363	0.000274486	0.00159848	0.000113024	0.000209901	0.000306778	0.000209901	0.000193755	0.00100107	0.00587722	0.0012917	0.000565118	0.000613556	0.000177608	0.00025834	0.000242193	0.000694287	0.000581264	0.000274486	0.00177608	0.000419802	0.000775019
ASV280	0.00012917	0.000710434	0.00109794	0	0.00184067	0.000145316	0.0164369	0.000484387	0.00109794	0.00216359	0.00707204	9.69e-05	0	8.07e-05	0	0	0	0	0	0	0	0	0	0	0	0	0.000516679	3.23e-05	8.07e-05	0	0	0	0	0	0.000290632	0	0.000177608	0.000952627	0.00012917	6.46e-05	0.000161462	0.00012917	0	0	0	0	0	0	3.23e-05
ASV281	8.07e-05	0	0	0	0.000161462	0.0112378	0	0.000661995	0.000661995	0.000306778	0	0.0222333	0	0	0	0	0	0	0	0	0	0	0	0	0	0	0	0	0	0	0	0	0	0	0	0	0	3.23e-05	8.07e-05	0	0.000775019	0	0	0	0	0	0.000419802	0	0
ASV282	0.000581264	0	0	0	0.0047147	0.00248652	0	0.000920335	0	0	0.00227662	0.00256725	0.00166306	0	0.00329383	0	0	0	0.000710434	0.00127555	0.00211516	0	0.0012594	0	0.00143701	0	0	0.00140472	0	0	0	0	0	0	0	0	0	0.00101721	0	0.0010818	0	0	0	0	0	0	0	0	0.00103336
ASV283	0	0	0	0	0	0	0	0	0	0	0	0	0	0	0	0	0	0	0	0	0	0	0	0	0	0	0	0	0	0	0	0	0	0	0	0	0	0	0	0	0	0.00122711	0	0	0	0	0	0	0
ASV284	0	0	0	0	0	0	0	0	0	0	0	0	0.00334227	0	0	0	0	0	0	0	0	0	0	0	0	0	0	0.0271741	0	0	0	0	0	0.00203442	0	0	0	0	0	0	0	0	0	0	0	0	0	0	0
ASV285	0.00072658	0.00167921	0	0.000742726	0.0106888	0.000871896	0.00100107	0.000226047	0	0.000678141	0.0149191	0.000936481	0	0	0	0	3.23e-05	0	0	0	0	0	0	0	0	0	0	0	0.000339071	0	0	0	0	0	0	0	0	0	0	0	0	0	0	0	0	0	0.000791165	0	0
ASV286	0	0	0	0	0	0	0	0	0	0	0	0	0.0252204	0	0	0.000500533	0.000500533	0.000145316	0.0044725	0	0	0	0	0	0.000807311	0	0	0	0	0	0	0	0	0	0	0	0	0	0	0	0	0	0	0	0	0	0	0	0
ASV287	0.00072658	0.00137243	0.0174218	0	0.000355217	0.00012917	0.00187296	0.000661995	0.00745955	8.07e-05	0	0	4.84e-05	0	0	3.23e-05	4.84e-05	0	4.84e-05	0.000161462	0	0	0	0	0	3.23e-05	0	0	0.000145316	0	0	0	0	0	0.000145316	9.69e-05	0	0	0	0	0.00106565	0.000306778	0	0	0	0	0	0.000193755	0
ASV288	0	0	0	0	0	0	0	0	0	0	0	0	0.00413343	0	0	0	0	0	0	0	0	0	0	0	0.0260116	0.00122711	0	0	0.00158233	0	0	0	0	0	0	0	0	0	0	0	0	0	0	0	0	0	0	0	0
ASV289	0	0	0	0	0	0.000339071	0	0	0	0	0	0	0	0	0	0	0	0	0.000242193	0	0	0	0.00238964	0	0	0	0.00227662	0	0.000322924	0.00121097	0.00113024	0	0.00397197	0.0102206	0	0	0	0	0	0	0	0.00148545	0	0.000807311	0	0.000452094	0	0	0
ASV290	0	0	0	0	0	0	6.46e-05	0	0	0	0	0	0	0.00025834	0.000242193	0	0	0	0	0	0	0	0	0	0	0.00180838	0.00140472	0	0.000193755	0	0	0.00109794	0.00402041	0	0	0.000145316	8.07e-05	0.000274486	9.69e-05	9.69e-05	0.0105758	0	0.00012917	0.00356831	0.00025834	0.000161462	0.00448865	0	0
ASV291	0	0	0	0	0	0	0	0	0	0	0	0	0	0.000936481	0	0	0	0	0	0	0	0	0	0	0	0	0	0	0	0.0220073	0	0	0	0	0	0.00574805	0	0	0	0	0	0.000839603	0	0	0	0	0	0	0
ASV292	0	0	0.00153389	0	0	0	0	0	0.000968773	0	0	0.00130784	0.000920335	0	0	0	0	0.00179223	0	0	0	0	0.000532825	0	0	0	0	0	0	0.00229276	0	0.00435948	0	0.000484387	0	0.0128685	0.00217974	0	0	0	0	0	0.000452094	0	0	0	0	0	0.000904188
ASV293	0	0	0	0	0.000113024	0.00697517	0	0	0	0	0	0	0	0	0	0.00166306	0	0	0	0	0	0	0	0	0	0	0	0	0	0	0	0	0	0	0	0.000775019	0	0	0	0	0	0	0	0	0	0	0	0.000710434	0
ASV294	0.00607098	0	0	0	0	0	0	0.00392353	0	0	0	0.000355217	0	0	0	0	0	0	0	0	0	0	0	0	0	0	0	0	0	0	0	0	0	0	0	0	0	0	0	0	0.00046824	0	0	0	0	0	0.000791165	0	0
ASV295	0	0	0	0	0	0	0	0	0	0	0	0	0	0	0	0	0	0	0	0	0	0	0	0	0	0	0	0	0	0.0280298	0	0	0.000161462	0	0	0	0	0	0	0	0	0	0	0	0	0	0	0	0
ASV296	0	0.000452094	0	0	0	0.0019214	1.61e-05	0.00264798	0.000274486	0.000322924	0.000306778	0.000226047	0.000226047	0.000177608	0	0	0	0.000710434	4.84e-05	3.23e-05	4.84e-05	0.000435948	0.000161462	0.000387509	0.000565118	0	0	0	3.23e-05	0	0.00025834	0	8.07e-05	0	0.00371363	0.00148545	0	0.000565118	0.0017115	0.000387509	0.00137243	0.00226047	0.000193755	0.00169535	0.00251881	0	0.00242193	0.000904188	0.000629703
ASV297	0	0	0	0.00376207	0.00280944	0	0	0	0	0	0.000807311	0	0.00179223	0	0.00237349	0.00187296	0.00180838	0.000645849	0	0.00113024	0	0	0	0	0	0	0.0012917	0.00298705	0	0	0	0	0	0	0	0	0	0	0.00198599	0.00180838	0	0	0	0	0.00226047	0.00319695	0	0	0
ASV298	0.00377822	0.00280944	0	0	0	0.00306778	0.000823457	0.00198599	0	0	0	0.00072658	0.0017115	0.00589337	0	0	0.000839603	0.00314851	0.000161462	0.0010495	0	0	0	0	0.000145316	0	0	0	0.00392353	0	0	0	0	0	0.000145316	0	0	0	0.000452094	0	0.000565118	0	0	0	0.00124326	0.000355217	0	0	0
ASV299	0	0	0	0	0	0	0	4.84e-05	0	0	0	0	0	0	0	0	0	0	8.07e-05	0	0	0	0	0	0	0	0	0	0	0	0	0.000548971	0	6.46e-05	0	3.23e-05	0	0.000661995	0	0	0	0	0	0.000500533	0	0	0	0	0
ASV300	0	0	0	0	0	0	0	3.23e-05	0	0	0	0	0	0	0	0	0	0	0	0	0	0	0	0	0	0	0	0	0	0	0	0.000484387	0	0	0	0	0	0.000193755	0	0	3.23e-05	0	0	0.00103336	0	0	0	0.000193755	0
ASV301	0	0	0	0	0.0021313	0.00536055	0.000500533	0.000888042	0.00185681	0.00137243	0.0143378	0.00146931	0	0	0	0	0.00085575	0	0	0	0	0.000629703	0	0	0	0	0	0	0	0	0.000645849	0	0	0	0	0	0	0	0	0	0.000613556	0	0.000403656	0	0	0	0	0	0.00122711
ASV302	0	0	0	0	0	0	0	0	0	0	0	0	0	0	0.00282559	0.00117867	0.00172765	0	0	0	0	0.00103336	0	0	0.00356831	0	0	0.00122711	0.00448865	0	0	0.000565118	0	0	0	0	0.000371363	0.00121097	0	0.00188911	0.00319695	0	0	0.000888042	0	0	0	0	0
ASV303	0.000452094	0	0	0	0	0	4.84e-05	0	0	0.000791165	4.84e-05	0	0	0	0	0	0	0	0	0	0	0	0	0	0	0	0	0	0	0.000193755	0	0	0.000113024	0	0	0.00059741	0.000548971	0.0012594	0.00122711	0	0.000322924	0.00539284	0	4.84e-05	0.000209901	0	0	0.0192947	6.46e-05
ASV304	0	0.000435948	0	0.00518294	0	0	0	0	0	0	0	0	0.00012917	0	9.69e-05	0.000290632	0.00201828	0	0	0	0	0	9.69e-05	0	0	0	0	0	0.000161462	0	1.61e-05	0	0	0	0	0	6.46e-05	0.00138857	0.00177608	0.000920335	0.00148545	0.000193755	0.000193755	9.69e-05	0	9.69e-05	0.00434333	0.000226047	6.46e-05
ASV305	0	0.000226047	0.00710434	0	0.00025834	0.00989763	0	0.000403656	0.00196984	0.000387509	0.000226047	0.00374592	0.000193755	0	0.000694287	0.000290632	0.00293861	0	6.46e-05	0	0	0	0.000984919	9.69e-05	0.000161462	0	0.00187296	0	0.000339071	0	0	0	0.000113024	0	0.000145316	0	0	0	0	0	0	0	0	0	0	0	0	0	0
ASV306	0	0	0	0	0	0	0	0	0	0	0	0	0	0	0	0	0.0292085	0.000823457	0	0	0	0.000952627	0	0.000968773	0	0	0	0	0.00135628	0	0	0	0	0	0	0	0	0	0	0	0	0	0	0	0	0	0	0	0
ASV307	0	0	0	0	0	0	0	0	0.000290632	0	0	0	0	0	0	0	0	0	0	0	0	0	0	0	0	0	0	0	0	0	0.000193755	0	0	0	0	0.00116253	0	0	0	0	3.23e-05	0	0.00046824	0	0	0	0	0.000274486	0
ASV308	0	0	0	0	0	0	0	0	0	0	0	0	0	0	0	0	0	0	0	0	0	0	0	0	0	0	0	0	0	0	0	0	0	0	0	0	0	0	0	0	0	0	0	0	0	0	0.000435948	0	0
ASV309	0	0	0	0	0	0	0	0	0	0.00106565	0	0	0	0.00941325	0	0.00025834	0.000888042	0	0	0.0106565	0.000209901	0.000306778	0.00374592	0	0	0.000290632	0	0	0	0	0	0	8.07e-05	0	0	0	0.000209901	0	0	0	0.000710434	0	0.00111409	0	0	0	0.00046824	0	4.84e-05
ASV310	0	0	0	0	0	0	0	0	0	0	0	0	0	0	0.00109794	0.00245422	0	0	0	0.000678141	0	0	0	0	0	0	0.00113024	0	0.000936481	0	0	0	0.00632932	0.0051345	0	0	0	0	0	0.000645849	0	0.00397197	0.000532825	0	0	0.000791165	0	0	0
ASV311	0.00177608	0	0.0107372	0	0	0	0	0	0	0	0	0.0021313	0.0010495	0	0	0	0.00355217	0.00201828	0	0	0	0	0.002761	0.00206672	0	0	0	0	0	0	0	0	0	0	0	0	0	0	0	0	0	0	0	0	0.00209901	0	0	0	0
ASV312	0.00571576	0	0	0	0	0	0.0158233	0	0	0	0	0	0	3.23e-05	0	0	0	0	0	0	0.00232506	0	0	0	0	0	0	0	0	0.00145316	1.61e-05	0	0	6.46e-05	3.23e-05	0.00450479	0	0	0	0	0	0	0	0	0	0	0	0.000177608	0
ASV313	0	0	0.00285788	0	0	0	0	0	0.0010818	0.00177608	0	0	0	0	0	0	0.0010495	0	0	0	0	0	0	0.00100107	0.000694287	0.00085575	0	0	0.000936481	0.000888042	0.00124326	0.000565118	0.00111409	0.00111409	0.000193755	0.0015016	0.00114638	0.00085575	0	0	0	0	0	0	0	0.000952627	0	0.00116253	0.00085575
ASV314	0	0	0	0	0	0	0.000419802	0.000113024	0	0	3.23e-05	0	0.00025834	0.000226047	0.00059741	0.00613556	0.000177608	0.00374592	0.00012917	0	0	0.0040527	0.000193755	0	0	0	0.000500533	0	0	9.69e-05	0	0	0.000532825	0	0	0	0	0	0.00025834	0	0.00458553	0	0	0	0.000177608	0	0	0.00156618	0
ASV315	0	0	0	0	0	0	0	0	0	0	0	0	0	0	0	0	0.0012594	0	0	0	0	4.84e-05	0	0	0.000532825	0	0	0	0.0328737	0	0	0	0	0	0	0	0	0	0	0	0	0	0	0	0	0	0	0	0
ASV316	0	0	0	0	0	0	0	0	0	0.00117867	0	0.00103336	0	0	0	0	0	0	0	0	0	0	0	0	0	0	0	0	0	0	0	0.00119482	0	0.000823457	0	0	0	0	0.00250266	0	0	0.00263183	0	0	0	0	0.0167436	0	0.00132399
ASV317	0	0	0	0	0	0	0	0	0	0	0	0	0.000532825	0.000371363	0.000581264	0.0103336	0.00641005	0.000145316	0.000306778	0.000145316	0.00180838	0.00209901	0.000516679	0.000710434	0.000322924	0	0	0	0.00602254	0	0	0	0	0	0	0	0	0	0	0	0	0	0	0	0	0	0	0	0
ASV318	8.07e-05	0	0	0	0	0	0	0	0	0	0	0	0	0	0	0	0	0	0	0.000113024	0	0	0	0	0	0	0	0	0	0	0.00025834	0	0	0.0259954	0	0	0	0	0	0	0	0	0	0	0	0.000306778	0	0	0
ASV319	9.69e-05	0.00113024	0.000177608	0	6.46e-05	0	0.00230891	0	9.69e-05	0.000758872	0.000419802	3.23e-05	0	0.000629703	0.00085575	0.000403656	0	0	0.000403656	0	0.000775019	0.00174379	0.00025834	0.00251881	0	0	4.84e-05	0.000193755	0.000242193	0	0	0.000968773	0	0	0.000904188	0	0.000484387	3.23e-05	0.00421416	8.07e-05	0.000484387	0	0	0.000113024	0.0010495	0.000209901	0	0	0
ASV320	0	0	0	0	0	0	0	0	0	0	0	0	0	0	0	0	0	0	0	0	0	0	0	0	0	0	0	0	0	0	0.0289986	0.000242193	0	0.000226047	0	0	0	0	0	0	0	0	0	0	0	0	0	0	0
ASV321	0	0	0	0	0.000209901	0	0	0	0	0	4.84e-05	4.84e-05	6.46e-05	6.46e-05	0.0148545	0.000161462	0.000193755	0	0	4.84e-05	0.00208286	9.69e-05	0	0	0	0	0.000242193	0	0	0	0.000742726	9.69e-05	0.000113024	0	0.000322924	6.46e-05	0	0	0.0047147	0	0	9.69e-05	0	0.00012917	0.00387509	0.000226047	0	0	0
ASV322	0.000193755	0.0107211	0.00611942	0.000226047	0.000371363	9.69e-05	0.00406885	0.000161462	0.00392353	0.000290632	0.000290632	0	3.23e-05	0.00059741	0	0	0	0	0	0	0	0	0	0	0	0	0	0	0	0	0	0	0	0	0	0	0	0	0.000613556	0	0	0.000710434	0	0.000290632	0.00012917	0	0	0	0
ASV323	0.000516679	9.69e-05	0.012142	0.00025834	0.00313237	0.000484387	0.000306778	0.000484387	0.00590952	0.00243808	0.000839603	0.00227662	0	0.00012917	0	0	0	0	0	0	0	0	0	9.69e-05	0	0	0	0	0	0	0	0	0	0	0	0	0	0	0	0	0	0	1.61e-05	0	0	0	0	0	0
ASV324	0	0	0	0	0	0	0	0	0	0	0	0	0	0	0	0	0	0	0	0	0	0	0	0	0	0	0	0	0	0	0	0	0	0	0	0.00382665	0	0	0	0	0.00463397	0.00505377	0	0.00332612	0.00243808	0	0.00314851	0.0064262	0
ASV325	0	0	0.000387509	0	0	0	0.000209901	0	0	0	0	0.000193755	0	0	0.000694287	0.000694287	0.000161462	0.00308393	0	0	0	0.00114638	0	0	8.07e-05	8.07e-05	0.000145316	0.000113024	0.000371363	0.00229276	0.0019214	0.000290632	0.000403656	0.000322924	0.0036329	9.69e-05	0	0.000419802	0	0.000161462	0.000403656	0.00124326	0	9.69e-05	0.000161462	0.000209901	0	0.000888042	4.84e-05
ASV326	0.000274486	0.000145316	8.07e-05	0.00103336	0.0153228	0.000322924	0.000355217	0.00184067	0.00132399	0.00025834	0.0010495	0.000226047	0	0	0.000209901	0	8.07e-05	0	0	9.69e-05	0.000113024	0.00563503	0	0.00114638	4.84e-05	0	0	0	0	0	0	0	0	0	0	0	0	0	0	0	0	0	0	0	0	0	0	0	0
ASV327	0	0	0	0	0	0.00290632	0	0	0	0	0	0.0025511	0.000355217	0	0	0.00634546	0	0	0	0	0	0.0010818	0	0	0.000742726	0	0	0	0	0	0.000823457	0	0.000274486	0	0	0	0	0	0.00678141	0	0	0	0	0	0.00544128	0	0	0	0
ASV328	0	0	9.69e-05	0.000145316	0.000322924	0.00858979	0.00820228	0	0.00059741	0.00339071	0.000419802	0.000113024	4.84e-05	0.0012917	0.000145316	0	0	0	0	0	9.69e-05	0.000193755	0	0.000145316	0	0.000661995	0	0	0	0.000936481	0	9.69e-05	0.000113024	0	0.000226047	0.000678141	0	0	6.46e-05	4.84e-05	0.000145316	0	6.46e-05	0	0.000839603	4.84e-05	0	8.07e-05	0
ASV329	0.000306778	0.00263183	0.00012917	0.000355217	0.00217974	0.000710434	0.000355217	0.000500533	0.000306778	0.00025834	0.00668454	0.000387509	9.69e-05	0.00012917	0.000193755	0.000435948	0.000839603	0.000193755	0.00012917	0.000113024	0.000387509	0.00109794	0.00113024	0.000161462	0.00025834	0.000209901	0	0	0.000193755	9.69e-05	0.000936481	0.00012917	0	0.00025834	0	0.00127555	0.000242193	9.69e-05	0.000452094	0	0.000306778	6.46e-05	9.69e-05	4.84e-05	0	0	0	9.69e-05	0.000193755
ASV330	0.00623244	0.000548971	0.000581264	0	0	0	0	0.000742726	0	0	0	0	0	0.00072658	0	4.84e-05	0	0.0130946	0	3.23e-05	0	0	0	0.000888042	0	0	0	0	0	0	0.00448865	0	3.23e-05	0	0	0	0	0	0	0	0	9.69e-05	0.000177608	0	0.000403656	0	0	0.000387509	0
ASV331	0.00198599	0.00179223	0.000355217	0.000613556	0.000419802	0.000645849	0.00140472	0.0023412	0.000322924	0.000645849	0.00177608	0.000565118	0.000226047	0.000242193	0.00072658	0.000177608	0	0	0	0	0.000161462	0.00137243	0	0	0	0.00012917	0.000629703	0.00132399	0	8.07e-05	0.000145316	0.000645849	0	0.00059741	0	9.69e-05	0	0.000371363	0.00101721	0	0.000532825	0.00025834	0	0.00012917	9.69e-05	0	0	0.00085575	0.000984919
ASV332	0	0	0	0	0	0.0125456	0	0	0	0	0	0.0180192	0	0	0	0	0	0	0	0	0	0	0	0	0	0	0	0	0	0	0	0	0	0	0	0	0	0	0	0	0	0	0	0	0	0	0	0	0
ASV333	0.00132399	0.000322924	0	0.000403656	0.000452094	0.00198599	0.000339071	0.000936481	0.000419802	0.0159525	0.00103336	0.00072658	0.000145316	0	0.000177608	3.23e-05	0	0	0	3.23e-05	0.00248652	3.23e-05	0.000226047	0	0	0	0	8.07e-05	0	0	0	0	0	0	0	0.000920335	0	9.69e-05	0	0	0	0.000145316	0	0.000209901	0	0	8.07e-05	0.000209901	0
ASV334	0	0	0	0	0	0	0	0	0	0	0	0	0.000403656	0	0	0	0	0	0	0	0	0	0	8.07e-05	0.00558659	0	0	0	0	0	0.0110602	0.000193755	0.000306778	0	0	0	0	0	0.000452094	0	0	0	0.000775019	0	0.000306778	0	0	0.000161462	0
ASV335	0.000516679	0	0.000775019	0.00444021	0.00182452	0.000888042	0	0.0012594	0.00059741	0.00164691	0.000387509	0.000193755	0.00232506	0.000145316	0	0	0.000145316	0.000177608	0.000290632	0	0	0	0	0.000742726	0.00676527	0	0.000290632	0.000403656	0.000193755	0	9.69e-05	0	0	0	0.000419802	0	0	0.000484387	0.00012917	0	0	0	0	0	0	0.00025834	0	0	8.07e-05
ASV336	0	0	0	0	0	0	0	0	0	0	0	0	0.0021313	0.00175994	0.00284174	0.00229276	0.00369748	0.000968773	0.00142087	0.00106565	0.00161462	0.0032131	0.00164691	0.00458553	0	0	0	0	0	0	0	0	0	0	0	0	0	0	0	0	0	0	0	0	0	0	0	0	0
ASV337	0.000177608	0.00799238	0.00113024	8.07e-05	0	0	0.000387509	0.000290632	0	0.000403656	0	0	0	0	0	0	0.000645849	0	0	0	0.000145316	0.00148545	0	0	0	0	0	0	0	0	0	0	0	0	0	0	0.000904188	4.84e-05	0.000145316	0	0	0	0.000306778	0	6.46e-05	0	0	0	0
ASV338	3.23e-05	0	0	0	0	0	6.46e-05	0.000452094	0.000581264	0.00012917	0.000242193	0.000209901	0	0	0	4.84e-05	0	0.000548971	0.000113024	0	9.69e-05	0.000161462	0	0	0	1.61e-05	0	0.000145316	0	9.69e-05	0.000807311	9.69e-05	0.00145316	4.84e-05	0	0.000387509	0.000113024	9.69e-05	0	9.69e-05	0.00025834	9.69e-05	0.00335841	0.000839603	0.00138857	0.00012917	0.00563503	0.000177608	0.00012917
ASV339	0.000403656	0	0.000403656	0.000807311	0	0.000387509	0.00025834	0.000177608	0.00175994	0.000387509	0.000435948	0	0.000581264	0.000419802	0.000242193	0.00012917	0.00253496	0.000548971	0.000355217	0.00135628	0.000306778	0.00137243	0.000516679	0.000290632	0.000177608	0.00106565	0	0	0.000242193	4.84e-05	0.000209901	0.000500533	8.07e-05	0.000161462	0	0.00161462	0.000161462	0.000242193	0.000613556	0	0.000322924	0	0.00046824	0.000984919	0.000823457	0.000113024	0	0.000548971	0.000661995
ASV340	0	0	0	0	0	0.0112378	0	0	0	0	0	0.0176155	0	0	0	0	0	0	0	0	0	0	0	0	0	0	0	0	0	0	0	0	0	0	0	0	0	0	0	0	0	0	0	0	0	0	0	0	0
ASV341	0.00025834	0.00400426	0.000177608	0.000355217	0.00025834	0.000613556	0.00226047	0.000339071	0	0	0.000403656	0	0.00587722	0.000500533	0	0	0.000177608	0	0.00100107	0	0	0	0	0	0.000290632	0	0.00196984	0	0.00143701	0	9.69e-05	0	0.00216359	0.000823457	0	0	0	0	0	6.46e-05	0	0	0	0	0.000193755	0	0	0.000145316	0
ASV342	0	0.000371363	0	0	0	0	0	0	0	0.000209901	0	0	0	0	0	0.000532825	0	0.00679756	0	0.000403656	0.000339071	0	0	0.000532825	0.000435948	0.00046824	0	0	0.000274486	0	0.00184067	0.0025511	0	0	0.00117867	0.000145316	0.000920335	0.0012594	0	0	0	0.00140472	0.000403656	0.00103336	0	0	0.000193755	0	0.000661995
ASV343	0	1.61e-05	0	0	0.000742726	0	0.000419802	0.000113024	0.000371363	0.000242193	0.00134014	0	8.07e-05	0	0	0.000177608	8.07e-05	0	0.000548971	0.00243808	0.00046824	0	6.46e-05	0	9.69e-05	0	0	0	0	0	0	0	0	9.69e-05	0	0.000193755	4.84e-05	0.000322924	0	0.000791165	0.00046824	0.000113024	0	0.00111409	0.000322924	0.0068137	0.000645849	0	9.69e-05
ASV344	0	0	0.00453709	0	0.00012917	0.000984919	0	0	0.00143701	0	4.84e-05	0.000113024	8.07e-05	0	0	4.84e-05	0.00398812	0.000484387	0.000113024	0	0	0	0.000419802	0	0	0	0	0.00752414	0.000290632	0.0023412	0.000613556	0	0.000145316	0.00172765	0	0	0	0	0	0.000242193	0	8.07e-05	0	0	0	0.000145316	0	0	6.46e-05
ASV345	0	0	0	0	0	0	0.000226047	0.000419802	0	0.000161462	0	0	0	0	0	0	0	0	0	1.61e-05	0.000807311	0.000339071	0	0.000581264	0	0	0	0.000661995	0	0.000532825	0	0	0	0	0.00012917	0.000791165	0	0	0	0	0.000322924	0	0	0.0036329	0	0.00100107	0.00025834	0	0
ASV346	0	0	0	0	0	0	0	0	0	0.00012917	0.000791165	0	0	0	0	0	0.000500533	0	0	9.69e-05	0	0	0.00158233	0	0.00256725	0	0	0.00448865	0	0	0.00059741	0	0	0.00332612	0.00137243	0	0.0023412	0.00140472	0	0	4.84e-05	0.00085575	0	0.00182452	0	0	0	0	0.00175994
ASV347	0	0	0.0159202	0	0	0.00368134	0	0	0.00628088	0	0	0	0	0	0	0	0	0	0	0	0	0	0	0	0	0	0	0	0	0	0	0	0	0	0	0	0	0	0	0	0	0	0	0	0	0	0	0	0
ASV348	0	0	0	0	0	0	0	0.000758872	0	0.000355217	0	0	0	0	0.000839603	0	0.000629703	0	0	0	0	0	0.000678141	0	0	0.000807311	0.00347144	0	0	0	0.00145316	0	0	0	0.00132399	0	0	0.000629703	0	0.00387509	0	0.00261569	0	0.000371363	0.000629703	0.00355217	0.00059741	0.00301934	0
ASV349	0	0	0	0	0	0	0	0	0	0	0	0	0	0	0	0	0	0.0174702	0	0	0	0	0	0.00921949	0	0	0	0	0	0	0	0	0	0	0	0	0	0	0	0	0	0	0	0	0	0	0	0	0
ASV350	0	0	0	0	0	0	0	0.000661995	0	0.000452094	0	0	0	0	0.00116253	0.000984919	0.00127555	0	0	0	0	0.000306778	0	0.00059741	0	0	0.000532825	0.000193755	0	0.000516679	0.000516679	0.000661995	0.000904188	0	0	0.0010495	0	0.000548971	0.000581264	0.000226047	0.00142087	0.00113024	0	0	0.000500533	0.000484387	0.000645849	0.00138857	0.000823457
ASV351	0.000274486	6.46e-05	0.00240579	0.0012917	0.000355217	0.000952627	9.69e-05	0.000403656	0.00316466	0.00109794	0.000371363	0.00012917	6.46e-05	0.000145316	0.00138857	0	0.00172765	0	0	0	0.00046824	0	0.00127555	0.00012917	0.000355217	0	0	0.000226047	0.000452094	0	0	0	0	0	0.000306778	0	0	0.00012917	0.000290632	0	0.000419802	0	0	0.000145316	8.07e-05	9.69e-05	0.00358446	0	8.07e-05
ASV352	0	0	0	0	0	0	0	0	0	0	0	0	0	0	0	0	0	0	0	0	0	0	0	0	0	0	0	0	0	0	0.000290632	0	0	0	0	0.000177608	0.00600639	0	0.00012917	0	0	0.000177608	0.0160655	0.000355217	0.000161462	0.000226047	0	0	0.000274486
ASV353	0	0	0.00085575	0	0	0	0	0	0.00240579	0	8.07e-05	0	8.07e-05	0	0	0	0	0	0	0	0	0	0	0	0.00334227	0	4.84e-05	0	8.07e-05	0.0145155	0	0.000113024	0	0.000355217	0	0.00122711	0	0	0	0	0	0.000678141	0	0	0	0	0	0	0
ASV354	0.022524	0	0	0.000452094	0.000306778	0	0.000839603	0.000629703	0.000661995	0	0.000452094	0	0	0.000161462	0	0	0	0	0	0	0	0	0	0	0	0	0	0	0	0	0	0	0	0	0	0.000403656	0	0	0	0	0	0	0	0	0	0	0	0	0
ASV355	0	0	0.00216359	0	0	0	0	0.00117867	0	0	0.011819	0	0	0.00508606	0	0	0	0	0	0.00290632	0	0	0	0	0	0.000145316	0	0	0	0	0	0	0.000145316	0	0	0.00116253	0	0	0	0.000161462	0	0	0	0	0	0.000371363	0	0	0
ASV356	0	0.000484387	0.00113024	0	0	0.000161462	0.000952627	0	0	0	0	0	0.000226047	0	0	0	0	0	0	0	0	0	0	0	0	0.000758872	0	0.0100752	0	0	0	0	0	0.000645849	0	0	0	0	0	0	0	0	0	0	0	0	0.000113024	0	0
ASV357	0	0.00247037	0	0	0	0	0.000823457	0	0	0	0	0	0	0	0	0	0	0	0	0	0	0	0	0	0	0	0	0	0.000532825	0	0	0	0	0	0	0	0	0.000758872	0.00268027	0.0111893	0.00012917	0.00111409	0	0.000177608	0.00427875	0.000209901	0	8.07e-05	0
ASV358	0.00146931	0.00193755	0.000177608	0.00647463	0.00364905	0.00119482	0.000984919	0.000629703	0.000387509	0.00195369	0.00219589	0.00072658	0.000274486	0.000355217	0.000694287	0.000226047	0.000500533	0	6.46e-05	0.000113024	0.000339071	0	0.000209901	0	0	0	0	8.07e-05	0	0.000177608	0	0	0	0	0	0	0	0	0	0	0	0.000306778	0	0	0	0	0	0	0
ASV359	0	6.46e-05	0	0	0	0	0	1.61e-05	3.23e-05	0	0	0	0	0	0.000403656	0	0	0.000871896	0	0	0	0	0	6.46e-05	0.00025834	0	0.0083153	4.84e-05	0	0	0	0	0.00800853	9.69e-05	0	0	0.000177608	6.46e-05	0.000871896	0.000177608	0	0	0	0	0.000484387	0	0	0	1.61e-05
ASV360	0.000193755	0	0.000113024	0	0.000371363	0	0	0.000177608	0	0	0	0	0	0.00381051	0.000145316	0	0	0	0	0.0017115	0	0.000177608	0	0	0	9.69e-05	0	0	0.000403656	0.00187296	0	0	0	0	0	0.00729809	0.00012917	0.00222818	0	0	0.000322924	0.000226047	0	0.00012917	0.000113024	0.00012917	0.000193755	0.00130784	0.000113024
ASV361	0	0	0	0	0	0	0	0.00167921	0	0	0	0	0.000791165	0.00113024	0	0	0.000161462	0.000242193	0.000516679	0.00046824	0.00116253	0.000484387	0	0	0.000645849	4.84e-05	0	0	0	0	0.000871896	0	0.00111409	0.000387509	0.00046824	0.000226047	0.000807311	0	0.00155004	0	0.000710434	0.000419802	0.000548971	0	0.00138857	0	0.00510221	0.000209901	0
ASV362	0.00316466	0	0.00166306	0.00256725	0	0	0	0.00237349	0.00217974	0.0021313	0	0	0.00100107	0	0.000613556	0	0	0	0.00208286	0	0.000807311	0	0.000984919	0	0	0.000516679	0	0	0	0	0	0.00308393	0	0	0	0	0	0	0	0	0	0	0	0	0.000516679	0	0	0.000387509	0
ASV363	0	0	0	0.000839603	0	0	0	0	0	0.000355217	0	0	0.000500533	0.000209901	0.00187296	0.000678141	0	0	0.00025834	0.000500533	0.00158233	0.000823457	0	0	0	0.000371363	0	0.00046824	0	0	0.000484387	0.00127555	0	0.000791165	0	0.000306778	0	0.00172765	0.000355217	0.000339071	0	0	0.00114638	0.00607098	0.0010818	0	0	0	0
ASV364	0	0	0	1.61e-05	4.84e-05	0	8.07e-05	0	0	9.69e-05	0.0101075	0	0	0	0	0	0	0	0	0.000113024	0	0	0	0	0	0	0	0	0	0	9.69e-05	0	9.69e-05	0	0	0	0	0.00143701	0.00195369	0	0	0	0.000209901	0	0.0010818	0	0.00390739	0	0.000339071
ASV365	0	0	0	0	0	0.000209901	0	0	0.000484387	0	0	0	0	0	0	0	0	0	0	0	0	0	0	0	0	0	0	0	0	0	0	0	0	0	0	0	0	4.84e-05	4.84e-05	0	0	0.00012917	0	4.84e-05	0	0.000113024	0.020651	0	0
ASV366	0.000500533	0.00169535	0.000177608	0.00046824	8.07e-05	0	0.000306778	0.00201828	0.000322924	0.000532825	0.000371363	0.000339071	0.000387509	0.000387509	0.00025834	0.000193755	0.000113024	0.000500533	6.46e-05	0.000242193	0.00193755	0.00140472	0.000403656	0.000548971	0.000209901	0	0	0.000306778	0	4.84e-05	0.000484387	0.000500533	0	0.00117867	3.23e-05	0.000839603	0.000775019	0.000419802	0.000629703	0.000193755	0.000274486	0.000339071	0	0.000306778	0.000306778	0	0.0010495	0.000161462	0.000209901
ASV367	0	0	0	0	0	0	0	0	0	0	0	0	0	0	0.000403656	0.00046824	0	0	0	0	0	0	0	0	0	0	0	0	0	0	0.00238964	0	0	0	0	0.00101721	0	0.0049246	0.00025834	0	0	0.000791165	0	0.000968773	0	0.000694287	0	0.00221203	0.00240579
ASV368	0	0.00106565	6.46e-05	0	0	0	0.00148545	0.000322924	0.000145316	0.000613556	0	1.61e-05	0	0	0	0	0	0	0	0	0	0.000145316	0	0	6.46e-05	0	0	0	0	0	0	0.000209901	0.000177608	0.000435948	0.000242193	4.84e-05	0.000484387	0	0	0	0.000113024	0.000113024	6.46e-05	0.000339071	0.000484387	0.00143701	0.00607098	0.000145316	0.00486001
ASV369	0	0.000322924	0.000306778	0.000452094	0.000242193	0.00072658	0	0.000161462	0.000419802	0.000629703	0.000871896	0.000645849	0.000274486	0.000403656	0.000387509	0	0.000145316	0	0.000387509	0.000226047	0.000984919	0.000500533	0	0.00085575	0.000161462	0.000113024	0	0	0	9.69e-05	0.00137243	0	0	0	0	0.000548971	0.000290632	0.000484387	0.00100107	8.07e-05	0.00046824	0.000484387	0.00203442	0.000742726	0.000290632	0.00046824	0.00313237	0.000387509	0.000484387
ASV370	0	0	0	0	0	0.00508606	0	0	0	0	0	0.000581264	0	0	0	0	0	0	0	0	0	0	0	0	0	0	0	0	0	0	0	0	0	0.000694287	0	0	0	0.000435948	0	0.00371363	0	0	0	0	0	0.000823457	0	0	0
ASV371	0	0	0	0	0	0	0	0	0	0	0	4.84e-05	0	0	0.000500533	0	0.00012917	0.0215391	0	3.23e-05	0.000177608	0	0.000113024	0	0.000145316	0	0.00138857	0.000242193	0	0	0	0	0.000306778	0.000177608	0	0	0	0	0	0	0	0	0	0	0	0	0	0	0
ASV372	0.000403656	0.000403656	8.07e-05	4.84e-05	0.000226047	0.00151775	0.000565118	0.0029709	0.000355217	0	0.000177608	0.000500533	4.84e-05	0	0.00271257	0	0.000387509	0	4.84e-05	0	0.000775019	0.000145316	0.00159848	0	0	0	6.46e-05	0.000419802	0.000113024	0.000145316	6.46e-05	0.000274486	0	0	6.46e-05	0.000387509	0.000209901	6.46e-05	0.00460167	9.69e-05	0.00119482	0.000355217	0	0.000113024	0.00012917	0	0	0.000791165	0.000145316
ASV373	0	0.000226047	6.46e-05	0	0.000419802	0.000209901	0	0	8.07e-05	0.000177608	0.00339071	0.000581264	6.46e-05	0	0.000565118	0.00187296	8.07e-05	0.000242193	0	6.46e-05	0.000904188	0.000516679	6.46e-05	0	3.23e-05	0	0	0	0	0	0.000355217	4.84e-05	0.000145316	0.000500533	0	0.000532825	0	3.23e-05	0	0	0.000177608	0.00012917	0.00992992	0.000387509	1.61e-05	8.07e-05	0.000242193	0	0
ASV374	0.000419802	0	0	0	6.46e-05	0	0	0	0	0	0	0	0	0	0	0	0	0	0	0	0	0.000952627	0.000113024	0	0	0	0	0	0	1.61e-05	0	0	0	0.000290632	0	0.000742726	0	0	8.07e-05	0	0	0.00169535	0	0	0	0	0	0.0191656	0
ASV375	0.000209901	0	0	6.46e-05	0	0.000791165	0	0	0	0	0	0.000242193	0	0	0.00361675	0	0	0	0	0	0	0	0	0	0	0.000387509	0	0	0	0	0	0	0	0	0	0.00284174	0	0.000145316	0	0.00702361	0	0.00085575	0	0.00012917	3.23e-05	0.00206672	0	0.000177608	6.46e-05
ASV376	0.00271257	0	0	0.000516679	0	0.000306778	0	0.000339071	9.69e-05	0.00565118	0	0	0	0	0	0	0	0	0	0	0	0	0	0	0	0	0	0	0	0	0	0	0	0	0	8.07e-05	6.46e-05	0.0062163	0.000710434	0	0.00124326	0.000145316	0.00012917	0	0.000145316	0.000371363	0	0.00116253	0.00203442
ASV377	0	0	0.015565	0	0	0.00145316	0	0	0	0	0.000177608	0	0	0	0	0	0	0	0	0	0	0	0	0	0	0	0	0	0	0	0	6.46e-05	0	0	0	0	0	0	0	0	0	0	0	0	0	0	0	0	0
ASV378	9.69e-05	0.000339071	0.000113024	0	0.000226047	0.000145316	0.000888042	0.000145316	0	0	0.000209901	0.000145316	0.00012917	0.00059741	0.000145316	0.00130784	0.000226047	0.000226047	0	6.46e-05	0.000823457	0.00229276	0	0.000161462	0.000193755	0.000177608	0.000145316	0	0.000516679	0.000920335	0.00134014	0.000775019	0.000209901	0.000145316	0.000403656	0.000193755	0.000193755	0.000113024	0.000984919	0.000452094	0.000177608	0.000274486	0	0.000613556	0.000500533	0.000371363	4.84e-05	0.000290632	0.00169535
ASV379	0	0	0	0	0	0	0	0	0	0	0	0	0	0	0	0	0.000581264	0	0	0	0	0	0	0	0	0	0	0	0.0257694	0	0	0	0	0	0	0	0	0	0	0	0	0	0	0	0	0	0	0	0
ASV380	0	0	0	0	0	0	0	0	0	0	0	0.000193755	9.69e-05	3.23e-05	0	0	0	3.23e-05	0	0	0	0	0	0	0	0.00012917	0	0	0	0	0.00418187	0.00755643	0.000209901	0.00224433	0	0	0.00224433	0	0	0	0	0	0.000775019	0	0	0	0	0.00206672	0.000290632
ASV381	0	0.00628088	0	0.00142087	0	0	0.00673297	0	0	0	0	0.00185681	0	0	0	0	0	0	0	0	0	0.000113024	0	0	0	0	0	0	0.00219589	0	0	0	0	0	0	0	0	0	0	0	0	0	0	0	0	0	0	0	0
ASV382	0	0	0	0	0	0	0	0	0	0	0	0	0	0	0	0	0.000758872	0	0	0	0	0	0	0.000290632	0.000484387	0	0.000371363	0	0.0236058	0	0	0	0	0	9.69e-05	0	0	0	0	0	0	0	0	0	0	0	0	0	0
ASV383	0	0	0.0012594	0.00046824	0.0025511	0	0	0	0.000419802	0	0.00143701	0.000387509	0.000936481	0.000742726	0.00100107	0.000871896	0.00158233	0.000355217	0	0.000516679	0.000532825	0.000871896	0	0.000823457	0	0.00085575	0.000516679	0	0.000678141	0.000145316	0.00025834	0	0	9.69e-05	0	0.000290632	0.000290632	0.00059741	0.000322924	0.000419802	0.000161462	0.000452094	0	0.000581264	0	0	0.000209901	0	0.000177608
ASV384	0	0.000500533	0.000888042	0.000209901	0.00100107	0.000791165	0	0.000661995	0.00329383	0.00187296	0	0.00025834	0	0	0	0	0	0	0	0.000339071	0	0	0	0	0	0	0	0	0	0.000226047	0	0	0.000565118	0	0.00437563	0.000209901	0	0	0	0	0	0.000678141	0	0.000306778	0.000920335	0	0	0.000161462	0
ASV385	0.000145316	0	0.00235735	0.000113024	0.00689444	0.000548971	0	0.00686214	0.00305164	0.000177608	0.00177608	0.000645849	0	0	0	0	0	0	0	0	0	0	0	0	0	0	0	0	0	0	0	0	0	0	0	0	0	0	0	0	0	0	0	0	0	0	0	0	0
ASV386	0	0.000791165	0	0.00369748	0	3.23e-05	0	0	4.84e-05	0	0	0.000113024	0	0	0.000113024	0	0	0	0	0	0.000581264	0	0	0	0.000952627	0.00025834	0	0	0	0	0	0	0	0	0	0.000161462	8.07e-05	0.00134014	0.000888042	0.000113024	0.000548971	0.00175994	0.000242193	0	0	0	0	0.00773404	0.000823457
ASV387	0	0	0	0	0	0	0	0	0	0	0	0	0	0	0	0	0	0	4.84e-05	0	0	0	0	0.0206349	0	0	4.84e-05	0	0	0	0	0	0	0	0	0	0	0	0	0	0	0	0	0	0	0	0	0	0
ASV388	9.69e-05	0	8.07e-05	0.000339071	0	0.000290632	0	0.00025834	0.000226047	0.000113024	0.00954242	8.07e-05	0	0	4.84e-05	0	1.61e-05	0	0	0.000742726	6.46e-05	0	0	0	0	0	0	0	0	0	0	0	0	0	0	0	0	0	0	0	0	0	1.61e-05	0	0.00124326	6.46e-05	0.00694288	0	0
ASV389	0.00164691	0	0.00122711	0.000193755	0	0.000500533	0.000952627	0.00243808	0.00177608	0.00025834	0	0.000274486	0.00114638	0	0	0	0	0	0	0	0	0	0	0.00127555	0.00121097	0	0	0	0	0.000839603	0	0.000920335	0.000387509	0.000322924	0.000516679	0	0	0	0	0	0	0	0	0.00187296	0.000419802	0.000387509	0	0	0
ASV390	0	0	0	0	0	0	0	0	0	0	0	0	0	0	0	0	0	0	0	0	0	0	0	0	0	0	0	0	0	0.00169535	0	0.00127555	0.00138857	0.000888042	0.00121097	0	0	0	0	0	0	0.00376207	0	0.0012594	0.000920335	0.000823457	0	0	0
ASV391	0.000694287	0.00161462	0.000920335	0.00103336	0.00269642	0.000322924	0.000403656	0.00046824	0	0.000387509	0.00101721	0	0.000791165	0.000500533	0.000936481	0.000920335	0.00121097	0	0.00025834	0.000290632	0.000532825	0.000452094	0.000548971	0.000193755	0.000516679	0	0.000371363	0.000710434	0.000742726	0	0.000177608	0	0.00025834	0.000226047	0	0	0	0	0.000145316	0	0.000145316	0	0	0.000306778	0.000177608	0	0	0	0.000339071
ASV392	0.000952627	0	0	0	0	0.00250266	0	6.46e-05	0	0	0	0	0	0	0	0	0	0	0	0	0	0	0	0	0	0	0	0	0	0	0	0.000113024	0	0	0	0.000274486	0	0	6.46e-05	0	0.00442406	0	0.00012917	0.000387509	8.07e-05	0	4.84e-05	0.00406885	0.00238964
ASV393	0	0	0	0	0	0	0	0	0	0	0	0	0	0	0	0	0	0	0	0	0	0	0	0	0	0	0	0	0	0.00448865	0	0	0	0	0.000775019	0	0	0	0	0	0	0.00794394	0	0	0.000516679	0.000500533	0	0	0
ASV394	0.000322924	0.00012917	0.000274486	0.000339071	0.000113024	0	0.000209901	0.000145316	0	0.000290632	0	0	6.46e-05	8.07e-05	0.000177608	0.000161462	0	9.69e-05	0	0	0	0	0	0.000145316	0.00012917	0	0	0.0010818	0.00012917	0.000177608	0.00025834	8.07e-05	0	0.000193755	0	0.000452094	0.000209901	0.00012917	0.000306778	0.000452094	0.000645849	0.00025834	6.46e-05	0.000145316	0.000177608	0.000274486	0.00490845	0.000306778	0.000710434
ASV395	0	0	0	0	0	0	0	0	0	0	0	0	0	0	0	0	0	0	0	0	0	0	0	0	0	0	0	0	0	0	0.000242193	0	0	0	0	0.00025834	0	0.000145316	0	1.61e-05	0.00025834	4.84e-05	0.000548971	0	0	0	0	0.00427875	0
ASV396	6.46e-05	0	0	0	0	0.00702361	0.000355217	0	0.00282559	0	0	0.0010495	0.00256725	0	0	0	0.000661995	0	0	0	0	0	0.000387509	0.000742726	0	0	0	0	0.00484387	0.000403656	0	0	0	0	0.000839603	0	0	0	0.000565118	0	0	0	0	0	0	0	0	0	0
ASV397	0.00510221	0.000290632	0.000145316	0.000371363	0	0	0.000242193	0	0	0.000113024	0.000177608	0.000581264	0	0.000403656	0.00135628	0.000113024	0	0	0	0.000161462	0	0.000113024	4.84e-05	0.000661995	0.000209901	0.00666839	6.46e-05	0	0	0	0	6.46e-05	0	0	0.00243808	0	0	0	0	0	0	9.69e-05	0	0.000113024	0	9.69e-05	0	0	0.00012917
ASV398	0.000209901	0.00101721	0.00127555	0	0	0	0	0.000242193	0.00196984	0	0.000193755	0	0	0.000177608	0	0	0.000161462	0.00103336	0.00025834	0	0.000226047	0.000161462	0.000435948	0	0.000355217	0	0	0	0	0	0	9.69e-05	0	0	0	0.000516679	0.000500533	0.000193755	8.07e-05	4.84e-05	0.000661995	0.000904188	6.46e-05	0.000322924	6.46e-05	0.000242193	0.00381051	0.00198599	0.000516679
ASV399	0.00012917	8.07e-05	0.000839603	6.46e-05	0.000565118	0.000403656	0.000193755	0.000306778	0.00137243	0.00046824	0.000613556	6.46e-05	3.23e-05	0.000145316	0	0.000387509	0	0.000113024	4.84e-05	0	0	0.000581264	4.84e-05	0.00059741	6.46e-05	9.69e-05	0	0	0.000113024	0.000209901	0.000113024	0.000177608	0.000177608	0.0101075	0.000113024	9.69e-05	0	0	0	0	0.000322924	0	0	0.00012917	6.46e-05	0.000823457	0	0	9.69e-05
ASV400	0	0	0.000339071	0	0	0	0	0.00188911	0.000500533	0	0.00025834	0.000742726	0	0	0	0	0	0	0.0012594	0.00059741	0	3.23e-05	0	0	0	0	0	0	0	0	0	0.00072658	0.000710434	0.000629703	0.000274486	0.000758872	0	0	0	0	0.000161462	0	0.000177608	0.00319695	0	0.000532825	0	0.000209901	0
ASV401	0	0	9.69e-05	0.000161462	0.000145316	0.000355217	8.07e-05	0.000209901	0.00117867	0.000177608	0.000145316	0	0	0.000904188	0	0.000226047	0.000419802	0	0.000371363	0.00423031	0	0.000209901	0.000678141	0	0	0.00046824	0.000290632	0	0.000113024	0	0.00025834	0.00059741	0	0	0	0	0.00159848	0	0.000177608	0.000678141	0	0	0.00253496	0	0	0.000355217	0	0	0.000613556
ASV402	0	0	0	0	0	0	0.0116899	0	0	0	0.000209901	0.00012917	0	0	0	0	0	0	0	0	0.000823457	0	0.00206672	0	0	0	0	0	0	0	0.00532825	0	0	0	0	0	0	0	0	0	0	0	0.00012917	0	0	0	0	0	0
ASV403	0	0	0	0	0	0	0	0	0	0	0	0	0	0	0	0	0	0	0	0	0	0	0	0	0	0	0	0	0	0	0	0	0	0	0	0	0	0	0.000920335	0	0	0	0	0	0	0	0	0	0
ASV404	0	0	0	0	0	0	0	0	0	0	0	0	0.00114638	0.00143701	0.0025834	0.000306778	0.00452094	0	0	0.00025834	0.00235735	0	6.46e-05	0.000306778	0.0010818	0.000888042	0.00111409	0	0.0048923	0	0	0	0	0	0	0	0	0	0	0	0	0	0	0	0	0	0	0	0
ASV405	0.00012917	0	0	1.61e-05	0.00012917	0	0	0	6.46e-05	0	0.000113024	0.000516679	0	8.07e-05	0	0	0.00222818	0	3.23e-05	0	0	0.000710434	0.000322924	0	0	8.07e-05	0	0	0.000209901	0	0	0	0	0.00116253	0	0	0	0	0	0	0	0	0	0.0025511	0	0	0.00211516	0	0.000904188
ASV406	0	0	0	0	0.00012917	0	0	3.23e-05	0	0	0.00012917	0	0.000177608	0	0	0	0	0	0	0.000290632	0	0	0	0	0.0108826	4.84e-05	0	0	0	0	9.69e-05	0.00783092	0	0	0	0	0	0.000177608	0	0	0	6.46e-05	0	0.000145316	0	0	0	0	0
ASV407	0.000532825	0.00072658	0	0	0	0.00138857	0.000290632	0	0	0.000452094	0.000387509	0	0	0.000694287	0	0	0	0	0	0	0.00277715	0.00211516	0.000678141	0	0	0	0	0	0	0	0.000565118	0	0	0	0	0	0.0010495	0.000484387	0	0	0.000775019	0	0	0.000371363	0	0.000532825	0.00156618	0	0.0015016
ASV408	0	0	0	0	0	0	0	0	0	0	0	0	4.84e-05	0	0	0	0	0	0	0	0	0	0	0	0	0	0	0	0	0.00025834	0	0	0	0	0	0.000161462	0	0	0.000161462	9.69e-05	0	0.0188588	0	0.000274486	9.69e-05	0.000161462	0	0.000177608	0
ASV409	0.00217974	6.46e-05	0.000306778	6.46e-05	0.000113024	0.000435948	0.000484387	0.000839603	0.000839603	0.000322924	0.000290632	0	0.00012917	0.00059741	0.0059741	0	0	0.000113024	0.000290632	0.000177608	0.000694287	0.000791165	0.000113024	0	0	0	9.69e-05	0	0	6.46e-05	0.000177608	0.000645849	0	0.000532825	0	0.000242193	6.46e-05	0	0.000209901	0	0	0.000226047	0	0	3.23e-05	0.000274486	0.00158233	0.000419802	0
ASV410	8.07e-05	0.000306778	0.000193755	0.000532825	0.000242193	0.000904188	0.000322924	0.000387509	0.000226047	0.00111409	0.00122711	0.000888042	9.69e-05	0.000419802	0.00163077	0.000226047	9.69e-05	0.00193755	0.000435948	0.000161462	0.000403656	0.00127555	3.23e-05	0.000161462	3.23e-05	0.000113024	0	0	0	0	0.000645849	0.000371363	0	0	0	0.000290632	0.000226047	9.69e-05	0.000290632	0.00025834	0.00025834	4.84e-05	9.69e-05	3.23e-05	0	0.000306778	0.00137243	4.84e-05	0.000435948
ASV411	0	0	0	0	0	0	0	0	0	0	0	0	9.69e-05	0.0134175	0	0	0	0	0	0	0	4.84e-05	0	0	0	0.00544128	0	0	0	0	0	0	0	0	0	0	0	0	0	0	0	0	0	0	0	0	0	0	0
ASV412	0	8.07e-05	0	0	0.000161462	0.0124649	6.46e-05	0.000290632	0	0.000678141	0.000226047	0.00691058	0	0	0	0	0	0	0	0	0	0	0	0	0	0	0	0	0	0	0	0	0	0	0	0	0	0	0	0	0	0	0	0	0	0	0	0	0
ASV413	0	0	0	0	0	0	0	0	0	0	0	0.00163077	0	0	0	0	0	0	0	0	0	0.000145316	0	9.69e-05	0	0	0	0	0	0	0.000322924	0	0	0	0	0.0115768	0.000290632	0.00103336	0.000403656	0	0	0.000242193	0	0	0.000403656	0	0	0.00116253	0.000694287
ASV414	0	0	0	0	0	0	0	0	0	0	0	0	0	0.0129493	0	0	0	0	0.000145316	0.0057642	0.000209901	0	0	0	0	0	0	0	0	0	0	0	0	0	0	0	0	0	0	0	0	0	0	0	0	0	0	0	0
ASV415	0	0	0	0	0	0	0	0.0010495	0	0.00117867	0	0	0	0	0	0	0.000516679	0	0	0	0	0	0.000548971	0	0	0	0	0	0	0	0	0	0.00122711	0.00085575	0	0	0	0	0	0	0.00134014	0	0.00184067	0	0.00117867	0	0	0.00130784	0.00103336
ASV416	0	0	0	0	0	0	0	0	0	0	0	0	0	0.000452094	0.00293861	0.00448865	0	0	0	0	0.0010495	0.00240579	0	0	0.00117867	0.00142087	0.00179223	6.46e-05	0.000516679	0.000161462	0.00012917	0.000193755	0.000645849	0.00109794	0	0	0	0	0	0	0	0	0	0	0	0	0	0	0
ASV417	0	0	0.000209901	0.00238964	0	0	0	0	0.000161462	0	0	0	0	0	0.000823457	0	0	0	0	0	0	0	0	0.000516679	0.000629703	0.000177608	0.00184067	0.00256725	0.00113024	0.000484387	0	4.84e-05	0	0.000888042	0	0.000435948	0	0	0	0	0	0	0	0	0	0.000306778	0.00122711	0	0
ASV418	0	0	0	0	0	0	0	0	0	0	0	0	0.00130784	0.000888042	0.00175994	0.000403656	0.00482772	0	0.00072658	0	0.00253496	0.000290632	0	0	0.0015016	0.000484387	0.000565118	0	0.00434333	0	0	0	0	0	0	0	0	0	0	0	0	0	0	0	0	0	0	0	0
ASV419	0.000968773	0	0.00641005	0.00124326	0	0	0.000242193	0.00158233	0.00196984	0.00465011	0	0	0.000516679	0	0	0	0	0	0	0	0	0	0	0	0.000290632	0	0	0	0	0	0	0	0	0	0	0	0	0	0	0.000710434	0	0	0	0	0	0	0	0	0
ASV420	0.000775019	0.00557045	0	0	0.000371363	0.00313237	0.000419802	0.000565118	0	0	0.00224433	0.00495689	0	0	0	0	0	0	0.000516679	0.000145316	0	0.000193755	0	0	0	0	0	0	0	0	0	0	0	0	0	0	0	0	0	0	1.61e-05	0	0	0.000113024	0	0	0	0	4.84e-05
ASV421	0	0	0	0	0	0	0	0	0	0	0	0	0	0	0.0197791	0	0	0	0	0	0	0	0	0	0	0	0	0	0	0	0	0	0	0	0	0	0	0	0	0	0	0	0	0	0	0	0	0	0
ASV422	0	0	0	0	0	0	0	0	0	0.00025834	0	0	0.000807311	0.000775019	0	0	0	0	0	0	0	0	0	0.000161462	0.000548971	0.000306778	0	0.00290632	0	0.000904188	0.000645849	0.00072658	0.000387509	0.000807311	0	0.000758872	0	0.000839603	0	0	0.000371363	0.000839603	0.000516679	0.00100107	0.000403656	0.000661995	0	0.000435948	0
ASV423	0	0	0	0	0	0.000145316	0	0	0.000290632	0	0	0.0163723	0	0	0	0.000161462	0	0	0	0	0	0.000226047	0	0	0	0	0	0	0.000274486	0.00119482	0	0	0	0	0	0	0	0	0	0	0	9.69e-05	0	0	0	0	0	0	0
ASV424	0	0	0	0	0	0	0	0	0	0	0	0	0.00523137	0	0.00595796	0	0	0	0	0	0	0	0	0.000242193	0.00511835	0	0.00190525	0	0	0	0	0	0	0	0	0	0	0	0	0	0	0	0	0	0	0	0	0	0
ASV425	0	0	0	6.46e-05	0	0	0.0015016	0	0	0	6.46e-05	0	0	0	0	0	0	0	0	0	0	0	0	0	0	0	0	0	0	0	0	0	0	0	0	0	0	0.000177608	0	0	0	0.000290632	0	0	0.000242193	0.00334227	0.00997836	0	0
ASV426	0	0	0	0	0	0	0	0	0	0	0	0	0	0	0	0	0	0	0	0	0	0	0	0	0	0	0	0	0	0	0	0	0	0	0	0	0.000532825	0	0	0	0	0	0	0	0	0	0	0	0.0121742
ASV427	0	0.000355217	0	0	0	0	0	0	0	0	0.000145316	0	0	0	0	0	0	0	0	0	0	0	0	0	0	0	0	0	0	0	0.000435948	0	0	0	0	0.000113024	8.07e-05	0	0.000823457	6.46e-05	0.00025834	0.00337456	0	0	0	4.84e-05	0.000145316	0.00182452	0.000387509
ASV428	0	0	0	0	0	0	0	0	0.000839603	0	0	0	0	0	0.00100107	0.00122711	0	0.00164691	0	0	0.00101721	0.000387509	0	0.000645849	0.000661995	0	0.000484387	0	0.000661995	0	0	0.000888042	0	0.000952627	0	0	0.000629703	0	0	0	0.000823457	0	0	0.000581264	0.000661995	0.00132399	0.00059741	0	0.000516679
ASV429	0	0	0	0	0	0.000113024	0	0	0.000613556	0.000274486	6.46e-05	0.000161462	0.00046824	0.000355217	0.00046824	0	8.07e-05	0.00209901	0.000161462	0	0.000952627	0.00085575	0.000161462	0	0	0.00127555	0	0	0	8.07e-05	0.000242193	9.69e-05	0.000871896	0.00221203	0	0.00135628	0.000209901	0	0	0.000145316	0	9.69e-05	8.07e-05	0.000403656	0.000145316	0.000177608	0	0.000242193	0.00177608
ASV430	0	0	0	0	0.0149675	0	0	0	0	0	0.00389124	0	0	0	0	0	0	0	0	0	0	0	0	0	0	0	0	0	0	0	0	0	0	0	0	0	0	0	0	0	0	0	0	0	0	0	0	0	0
ASV431	0	0.00012917	0	0	0	0.00012917	0	0	0	0	0	0.00046824	9.69e-05	0	0	0	0	0	0	0	8.07e-05	0	0	0.00025834	9.69e-05	0	0	0	0	0	0.000193755	0	0	0	0	0	0	1.61e-05	0.00103336	0	0.000452094	0	0.00012917	0.000694287	0	0	0.00245422	0	0.00179223
ASV432	0	0	0.000791165	0	0.000435948	0	0	0.00059741	0.000661995	0	0	0	0	0	0.000403656	0	0	0	0	0	0	0.000209901	0	0	0	0	0	0.000532825	0	0	0.000661995	0.000807311	0.0012594	0.000936481	0	0	0	0.00059741	0.000645849	0	0.000871896	0	0.000613556	0.00103336	0	0.000839603	0.000661995	0	0.000452094
ASV433	0	0	0	0.000339071	9.69e-05	0	0.000161462	0.000242193	0.000823457	0	0.000419802	0	0	0	0	0.00059741	0	0	0	0	0	0	0	0	0	0	0	0	0.000339071	0.00101721	0	0	0.000193755	0	0	0	0	0	0	0	0	0.00280944	0	0	0	0	0	0	0
ASV434	0	0	0	8.07e-05	0	0	0	0	3.23e-05	0	0	0	0	0	0	0	0	0	0	0	0	0	0	0	0	0	0	0	0	0	0	0.000839603	0.000888042	0.00142087	0.00135628	0	0	3.23e-05	0	0	0	0	0	0.00182452	0.0012917	0.002761	0	0	0
ASV435	0	0	0.00256725	0	0.00565118	0	0	0.000775019	0	0	0.00393968	0.00351988	0	0	0	0	0	0	0	0	0.000629703	0	0	0	0	0	0	0	0	0	0	0	0	0	0	0	0.000274486	0	0	0	0	0	0	0	0	0	0	0.000387509	0
ASV436	0	0	0	0	0	0	0	0	0	0	0	0	0	0	0	0	0	0	0	0	0	0.000306778	0	0	0	0	0	0	0	0.000548971	0.00025834	0.00059741	0	0	0	0.00122711	0.000694287	0.000516679	0.000710434	0.000904188	0.00117867	0.000839603	0	0.000791165	0	0.000968773	0.000355217	0.000629703	0
ASV437	0.000791165	0	0	0	0	0	0	0.000871896	0	0	0	0	0	0.0150806	0	0	0	0	0	0.00124326	0	0	0	0	0	0	0	0	0	0	0	0	0	0	0	0	0	0	0	0	0	0	0	0	0	0	0	0	0
ASV438	0.000113024	0	0	0	0	0.000193755	0	0	0	0	0	0	0.000419802	0	0.000968773	0.00193755	0	0.000193755	0	0.000113024	0.00072658	0.000161462	0.000403656	0.000226047	9.69e-05	0.000242193	0.000177608	0	0.000274486	0.000952627	0	0.000581264	0	0	0	0.00025834	0.00072658	0.00132399	0.000145316	0.000678141	0.00012917	0.000904188	0	0.000290632	0.000145316	0.000322924	0.000661995	0	0.000435948
ASV439	0	0	0.000548971	0	0	0	0	0	0.000274486	0	0	0	0.0012917	0.000710434	9.69e-05	9.69e-05	0	0.0066361	0	4.84e-05	4.84e-05	0.00132399	0.00185681	0	0.00205057	3.23e-05	0	0.000209901	0	0	0	0.000452094	0	0.000904188	0	0	0	0	0	0	0.000355217	0	0	4.84e-05	0	0	0	0	0.00072658
ASV440	3.23e-05	0	0	3.23e-05	0	0	0.00116253	9.69e-05	0	0	0	3.23e-05	0	0	0	0.000839603	9.69e-05	0.000274486	0.000177608	0	3.23e-05	0.000742726	0	0.000209901	0	0.00117867	0.000161462	0	0	0.000322924	0	0.000532825	6.46e-05	3.23e-05	0.00198599	0.00116253	0.000145316	0.0010818	0	0	0.000758872	0	6.46e-05	0.000209901	0.000161462	0.000306778	0.00381051	0.000113024	0
ASV441	6.46e-05	0.000645849	0	0.000226047	0	0	0	0.000290632	0.000177608	0	0	0	0.000355217	0	0.00103336	6.46e-05	0	0	0	0	0	0	0	0	0.000452094	0	0	0	0.000322924	0	0	0	0	0	0	0.00237349	0.000419802	0.000516679	0.0010495	4.84e-05	0.000177608	0.000952627	0.000145316	0.000419802	0.00101721	0.00046824	0.000871896	0.000871896	0.00059741
ASV442	0	0	0	0	0.00012917	0.000193755	0	0.000209901	0.00025834	0.000871896	0.000371363	0.0131107	0	0	0	0	0	0	0.000548971	0	0	0	0	0	0	0	0	0	0	0	0	0	0	0	0	0.00216359	0	0	0	0	8.07e-05	0	0	0	0.000113024	0	0	0	0
ASV443	0	0	0	0	0	0	0	0	0	0	0	0	0	0	0	0	0	0	0	0	0	0	0	1.61e-05	0	0	0	0	0	0.00358446	0	0	0	0.000209901	0	0	0	0	0	0	0	0.00739497	0	0	0	0.000242193	0	0	0
ASV444	3.23e-05	0	0	0	0	0.00085575	0	0.000209901	0	0.00012917	0.00012917	0.0168567	0	0	0	0	0	0	0	0	0	0	0	0	0	0	0	0	0	0	0	0	0	0	0	0	0	0	0	0	0	0	0	0	0	0	0	0	0
ASV445	0	0	4.84e-05	0	0	0	0.0036329	0.00127555	9.69e-05	0.000113024	0.00012917	0.000355217	9.69e-05	0	3.23e-05	0	0	0	0	0	0.000290632	9.69e-05	0	0	0	0	6.46e-05	0	0	0	0	0	0	0.000177608	0.000177608	0	0	0.000355217	0	0	0.000581264	0.000694287	0	0	0	0	0	0.00012917	0.000177608
ASV446	0	0	0	0	0	0	0	0	0	0	0	0	0	0.000694287	0.000565118	0.000888042	0.0012594	0	0.000274486	0.000193755	0.0100429	0	0.00101721	0.000532825	0	0	0.000113024	0	0.00134014	0	0	0	0	0	0.00012917	0	0	0	0	0	0	0	0	0	0	0	0	0	0
ASV447	0	0	0.00106565	0	0	0.0124649	0	0	0.00140472	0	0	0.00253496	0	0	0	0	0	0	0	6.46e-05	0	0	0	0	0	0	0	0	0	0	0	0	0	0	0	0	0	0	0	9.69e-05	0	0.000710434	0	0	0	0	0	0	0
ASV448	0	0	0	0	0	0	0	0	0	0	0	0	0	0	0	0	0	0	0	0	0	0	0	0	0	0	0	0	0	0.012917	0.000209901	0	0	0	0	0.000952627	0	0	0	0	0	0.000694287	0	0	0	0	0	0.00012917	0
ASV449	0	8.07e-05	0	0.00188911	0	0	0	0	0	0	0	0	0.0101398	0	0.000145316	0	0.000177608	0.000161462	9.69e-05	0.000113024	0	0.0015016	0.000290632	0	0.000419802	0	0	0	0	0	0	0	0	0.000888042	0	6.46e-05	0	0	0	0	0	0	0	0	0	6.46e-05	0.000193755	0	0
ASV450	0	0	0	0	0	0	0	0	0	0	0	0	0	0	0	0	0	0	0	0	0	0	0	0	0	0	0	0	0	0	0	0	0	0	0	0	0	0	0.00025834	0	0	0	0	0	0	0	0	0	9.69e-05
ASV451	0	0	0.00313237	0	0.00892886	0	0	0	0.00256725	0	0.00184067	0	0	0	0	0	0	0	0	0	0	0	0	0	0	0	0	0	0	0	0	0	0	0	0	0	0	0	0	0	0	0	0	0	0	0	0	0	0
ASV452	0	0	0	0	0	0	0	0	0	0	0	0	0	0	0	0	0	0	0	0	0	0	0	0	0	0	0	0	0	0	0.0159848	0	0	0.000209901	0	0	0	0	0	0	0	0	0.000355217	0	0	0	0	0	0
ASV453	0.000452094	0	0	0.000161462	0	6.46e-05	0	0.000306778	0	8.07e-05	0	0.00156618	0.000419802	6.46e-05	0.00012917	0.000968773	0.000339071	0.000322924	0.000145316	4.84e-05	0	0.000710434	6.46e-05	9.69e-05	8.07e-05	0	0.000113024	8.07e-05	0	0.00012917	9.69e-05	0.000532825	0.00193755	0.000113024	0.000871896	0.000403656	0	0	9.69e-05	0.000161462	0	0	0	0.000177608	0.00012917	4.84e-05	0	0.00306778	0
ASV454	0	0	0	0	0	0	0.000242193	0.000371363	0	0.000177608	0	0	0	0	0	0	0	0	0	0	0	0	0	0	0	0	0	0	0	0	0	0	0	0.000177608	0	0	0	0	0	0.000678141	0	0	0	0	0	0	0	0	0.000500533
ASV455	0	0	0	0	0	0	0	0	0	0	0	0	0.0134982	0	0	0	0	0	0.00159848	0	0	0	0	0	0.000500533	0	0	0	0	0	0	0	0	0	0	0	0	0	0	0	0	0	0	0	0	0	0	0	0
ASV456	0	0	0	0	0	0	0	0	8.07e-05	0	0	6.46e-05	0	8.07e-05	0	0	0	0	0	0	0	0	0	0	0	0.000419802	0	0	0	0	0.000613556	0.000371363	0.000371363	0	0	8.07e-05	0	0.00500533	0.000177608	0	0.00356831	0.00012917	3.23e-05	0.00142087	0	6.46e-05	0.0025511	0	0
ASV457	0.00012917	0	9.69e-05	0	9.69e-05	0.000532825	0	0	0.000290632	0.00012917	0.000113024	0	0	0.000177608	0	0	0	0.000177608	0	0	0	0	0	0	0	0.000177608	0	0.000226047	0	9.69e-05	0.000177608	0.000484387	0.000306778	0.00059741	0	0.000645849	0.000161462	0.000145316	0.00224433	0	0.000355217	0.00109794	0.000177608	0.000306778	0.003423	8.07e-05	0.000758872	0.000661995	0
ASV458	0	0	0	0	0.00280944	0.000516679	0	0	0.000791165	0	0.000791165	0	0	0	0	0	0	0.000484387	0	0	0	0	0	0	0	0	0	0	0	0	0	0	0	0	0	0.000242193	0	0	0.000742726	0.00167921	0.00205057	0.00130784	0.00134014	0.00059741	0.000807311	0.000242193	0.000984919	0	0
ASV459	0	0	0	0	0	0	0	0.00012917	0	0	0	0	0	0	0	0	0	0	0.000193755	9.69e-05	0	0.000306778	0	6.46e-05	0	4.84e-05	0	0	0	0	0	0.000226047	0.000113024	0	0	0.000339071	0.000371363	0	0	8.07e-05	0	0	0.000113024	6.46e-05	0.00219589	0	0	0.000791165	0.0087351
ASV460	0	0	0	0	0	0	0	0	0	0	0	0	0.00012917	0	6.46e-05	0	0	0	0.00476313	0	0.0036329	0	0.006846	0	0.000113024	0	1.61e-05	0	0	0	0	0	0	0	0	0	0	0	0	0	0	0	0	0	0	0	0	0	0
ASV461	0	0	9.69e-05	0.000226047	0	0	0	0	0	0	0	0	0	0	0	0	0	0	0	0	0	0	0	0	0	0	0	0	0	0	3.23e-05	0.000452094	0	0	0	9.69e-05	0	0.000274486	0.0012594	0	0	0	0	6.46e-05	0	0	0	8.07e-05	0.00012917
ASV462	0.000113024	0	0.000161462	3.23e-05	3.23e-05	0	3.23e-05	0.000952627	0.00159848	0.000209901	0	0	4.84e-05	0.000435948	4.84e-05	0	0	3.23e-05	0.000113024	0.00072658	0	0	0	0.000758872	4.84e-05	0	0.00103336	0	0	0	6.46e-05	0.000177608	0.00343914	0.0010495	0	0	0	4.84e-05	0	0.00121097	0	8.07e-05	0	6.46e-05	0.000209901	0.002761	0	0	0
ASV463	0	0	0	0	0	0	0	0	0	0	0	0	0	0	0	0	0	0	0	0	0	0	0	0	0	0	0	0	0	0	0	0	0	0	0	0	0	0	0	0.0135305	0	0	0	0	0	0.00193755	0	0	0
ASV464	0	0	0.000613556	6.46e-05	0.000532825	0	0	0	0.000306778	0.000113024	0.000452094	0	0.000290632	0	0.000209901	0.000403656	0.000548971	0	0	0	8.07e-05	0.000274486	0.000113024	0.000145316	0.000322924	0.000161462	0.000177608	0.00198599	0.00025834	0.000209901	8.07e-05	0.00012917	0.00025834	0.000274486	0	0	0.00025834	0.000403656	0.000193755	0.000161462	0	0.000355217	0.000403656	0.000371363	0.000371363	0.000387509	0.000435948	0.000306778	0.000419802
ASV465	0.000371363	0	0	0	0	0	0	0.0010818	0	0	0	0.000419802	0	0	0	3.23e-05	6.46e-05	0	6.46e-05	0	0.000661995	0.000371363	0	0	0	0	0	0.000242193	0	8.07e-05	0	0.00113024	0.00145316	0.0015016	0	0.00117867	0.000290632	0	0	0	0.000355217	0	0.000226047	0.00316466	0	0	0	0.000742726	0
ASV466	0	0	0	0	0	0	0	0	0	0	0	0	0	0	0.000484387	0	0	0	0	0	0.00059741	0	0	0	0	0	0	0	0	0	0	0	0	0	0	0.000209901	0	0.0010818	0.000452094	0	0	0.000500533	0	0.000355217	0.00138857	0	0.00208286	0.00072658	0
ASV467	0	0	0	0	0	0	0	0	0	0	0	0	0	0	0	0	0	0	0	0	0	0	0	0	0	0	0	0	0	0.000322924	0.00980076	0	0.000145316	0.000145316	0	0.0036329	0	0	0	0	0	0	0.00046824	0	0	0.000435948	0	0.000209901	0
ASV468	0	0	0	0	0	0	0	0	0	0	0	0	0	0	0	0	0	0	0	0	0	0	0	0	0.000791165	0	0	0	0	0	0.0132722	0.000645849	0.000290632	0	0	0	0	0	0	0	0	0	0.000355217	0	0	0	0	0	0
ASV469	0	0	0	0	0.000920335	0	0	0.00012917	0.000548971	0.000193755	0	0	0	0.000161462	0	0	0.000145316	0	0	0	0.00012917	0	0.000209901	0	0	0	0	0	0	0	0	0	0	0	0	0.000193755	0.000306778	0.000306778	0.00143701	0.000226047	0.000226047	0.00103336	0	0.000419802	9.69e-05	0	0.00109794	0.00351988	0.000177608
ASV470	0	0.000177608	0	0	9.69e-05	0	0.00287403	0.000661995	0.000322924	0.000177608	0	0.000742726	0	0.000161462	3.23e-05	4.84e-05	0	0	0.000209901	0	0	0	0	0	0	0	0	0.00025834	0	0	0	4.84e-05	0	0	9.69e-05	0	0	0	0.000193755	6.46e-05	0	0.000145316	0.000355217	0.000419802	0	0.000387509	0	0.00012917	0.000419802
ASV471	0	0	0.0049246	0	0	0	0	0.000694287	0.0106565	0	0	0	0	0	0	0	0	0	0	0	0	0	0	0	0	0	0	0	0	0	0	0	0	0	0	0	0	0	0	0	0	0	0	0	0	0	0	0	0
ASV472	0	0	0	0	0	0	0	0	0	0	0	0	0	0	0	0	0	0.00928408	0	0	0	0	0	0.00636161	0	0	0	0	0	0	0	0	0	0	0	0	0	0	0	0	0	0	0	0	0	0	0	0	0
ASV473	6.46e-05	0.000113024	4.84e-05	0	0.00103336	0.00369748	0	0.000629703	6.46e-05	0	0.00195369	0.000161462	0	0	0	0	0	0	0	3.23e-05	0.00085575	0	0.000339071	0.0048923	0	0	0	0.000952627	8.07e-05	0	0.000355217	0	0	0	0	0	0	0	0	9.69e-05	0	0	0	0	0	0	0	0	0
ASV474	0	0	0	0	0	0	0	0	0	0	0	0	0	0	0	0	0	0	0	0	0	0	0	0	0.00072658	0.0012917	0	0	0	0.000500533	0	0.00059741	0	0	0	0	0	0	0.0044725	0	0.00101721	0.0012594	0	0	0	0	0.00155004	0	0.00046824
ASV475	0	0	0	0.000113024	0	0	0	0	0	0	0	0	0.000209901	0.000113024	0.000274486	0.000694287	8.07e-05	0.000274486	0.000145316	0	0.00251881	0.0012917	0.00059741	0.000387509	0.000322924	0	0	0	0	0	0.000710434	9.69e-05	6.46e-05	0.000661995	0	0.000290632	4.84e-05	0.000145316	0.000339071	0	0	0.000193755	6.46e-05	0	0.000371363	4.84e-05	0.00282559	9.69e-05	0.000209901
ASV476	0	0	0	0	0	0	0	0	0	0	0	0	0	0	0	0	0	0	0	0	0	0	0	0	0	0	0	0	0	0	0	0.000904188	0.00109794	0.000968773	0.00201828	0	0	0	0	0	0	0.00103336	0	0.00177608	0.00111409	0.00101721	0	0	0
ASV477	0	0.000209901	9.69e-05	0	0	0	0.000209901	0.000209901	0.000516679	0.00025834	0.00025834	0.000435948	0	0	0	0	0	0	0.000484387	0	0	0.000274486	0	0.000984919	0	0	0	0	0.00025834	9.69e-05	0.00298705	0	0	0	0	0.000161462	0	0	0.000177608	0	0	0	0.0036329	0	0.000145316	0	0	0.00025834	0.00012917
ASV478	0	0	0	0	0	0	0	0	0	0	0	0	0	0	0	0	0	0	0.00163077	0.00025834	0.00177608	0.00737882	0.00366519	0	0	0	0	9.69e-05	0	0	0	0	0	0	0	0	0	0	0	0	0	0	0	0	0	0	0	0	0
ASV479	0	0	0	0.00109794	0.00416573	0	0	0	0.000419802	0.00245422	0.00671683	0	0	0	0	0	0	0	0	0	0	0	0	0.000177608	0	0	0	0	0	0	0	0	0	0	0	0	0	0	0	0	0	0	0	0	0	0	0	0	0
ASV480	0	0.00012917	0	0	0	0.000565118	0	0.000500533	0.000161462	0	0	0	0	0	0	0	0	0	0	0	0	0	0	0	0	0	0	0	0	6.46e-05	8.07e-05	0.012255	0.000145316	0	0	6.46e-05	0	0	0	0	0	0	0	0.000387509	0	0	0	0.00025834	0
ASV481	0.000516679	0	0.00166306	0	0	0	0	0.00185681	0.00072658	0	0	0.00100107	0.00121097	0	0	0	0.00153389	0.000532825	0.000694287	0.000177608	0.000226047	0	0.000290632	0	0.000371363	0.000355217	0.000274486	0.00103336	0	0	0	0	0	0.00114638	0.000161462	0	0	0	0	6.46e-05	0	0	0	0.00059741	0	0	0	0.000161462	0
ASV482	0	0	0	0	0	0	0	0	0	0.00106565	0	0	0	0	0	0	0	0	0.000387509	0.000823457	0	0	0	0.00180838	0	0.000952627	0.0017115	0	0	0	0	0	0	0.000387509	0	0	0	0	0.000678141	0	0	0.00072658	0	0	0	0.000678141	0.00361675	0	0
ASV483	0	0	0	0	0	0.00655536	0	0	0	0	0	0.00474699	0	0	0	0	0	0	0	0	0	0	0	0	0	0	0	0	0	0	0	0	0.00434333	0	0	0	0	0	0	0	0	0	0	0	0	0	0	0	0
ASV484	0	0	0	0	0	0	0	0	0	0	0	0	0	0	0	0	0	0.0101721	0	0	0	0	0.00119482	0.00361675	0	0	0	0	0	0	0	0	0	0	0	0	0	0	0	0	0	0	0	0	0	0	0	0	0
ASV485	0	0	0	0.00455323	0	0	0	0	0	0.00395582	0.00137243	0	0	0.00345529	0	0	0	0	0	0	0	0	0	0	0	0	0	0	0	0	0	0	0	0	0	0.000904188	0	0	0	0	0	0	0	0	0	0	0	0	0
ASV486	0	0	0	0	0	0	0	0.0010495	0	0	0	0	0	0	0	0	0	0	0	0	0	0	0	0	0	0	0	0	0	0.000290632	0	0	0	0	0	0.0103497	0	0	0	0	0	0.000226047	0.000274486	0.000290632	0.000209901	0.000322924	0	0.000613556	0
ASV487	0	0	0	0	0	0	0	0	0	0	0	0	0	0	0	0	0	0	0	0	0	0	0.0149998	0	0	0	0	0	0	0	0	0	0	0	0	0	0	0	0	0	0	0	0	0	0	0	0	0	0
ASV488	0.000936481	0	0	0	0.00140472	0	0	0.000839603	0	0	0.00837989	0	0	0	0	0.000177608	0	0	0	0.00012917	0.00121097	0.00025834	0	0	0	0	0	0	0	0	0	0	0	0	0	0	0	0	0	0	0	0	0	0	0	0	0	0	0
ASV489	0	4.84e-05	0	0	0	0	0.00172765	0.00206672	9.69e-05	6.46e-05	0	0	0	0.000161462	0.000904188	0.000952627	0.000791165	0	0	0	0.000145316	0.000322924	0	0	0	0	0.00221203	0	0	8.07e-05	0	0	0	0.000226047	0	0.000113024	0.000161462	0	1.61e-05	0.000710434	0.000193755	4.84e-05	0	0.00137243	4.84e-05	0	0	4.84e-05	0.00012917
ASV490	0	0	0	0	0	0	0	0	0	0	0	0	0.000242193	0	0	0.0103174	0	0.000113024	0	0	0.000177608	0.00214745	0	0	0	0	0	0	0	0	0.000387509	0	0	0	0	0	0	0	0	0	0	0	0	0	0	0	0	0	0
ASV491	0	0	0.00106565	0	0.000694287	0	0	0	0.000339071	0	0.000419802	0	0	0	0	0	0.00025834	0	0	0	0	0	0	0	0	0	0	0.000742726	0.000678141	0	0	0	0	0	0	0	0.000581264	0	0.000742726	0	0.000936481	0	0	0.000403656	0.000565118	0	0.000452094	0	0.00059741
ASV492	0	0	0.000403656	0	0	0	0	0	0.000629703	0	0.00012917	0	0	0	0	0	1.61e-05	0	0	0	0	0.000936481	0.000209901	0	0	0	0	0	0	0	0	0	0	0	0	0	0.00025834	0.000290632	0	0	0	0.000177608	0.00111409	0.00532825	0.000339071	0	0	0	0
ASV493	0	0	0	0	0	0	0	0	0	0	0	0	0	0	0	0	0	0	0	0	0	0	0	0	0	0	0	0	0	0	0	0	0	0	0	0	0.00889657	0	0.000306778	0.000209901	0	0	0.00456938	0	0	0	0	0	0
ASV494	9.69e-05	0	0	0	0	0	0.000403656	0.000419802	0.000274486	0	0	0.000500533	0	0	0	0	0.00072658	0.00146931	0	0	0	0	0.00059741	0.00247037	0.000355217	0	0.00175994	0	0	0	0	0	0.00247037	0	0	0	0.000209901	0	0	0	0	0	0	0	0	0.000306778	0	0	0
ASV495	0	0.000339071	0	0	0	0	0	0	0	0	0	0	0	0	0	0	0.00106565	0.000161462	0	0	0	0.000823457	0	0	0.000742726	0	0	0.00414958	0.000484387	0.00106565	0	0.000936481	0.000565118	0.000968773	0	0.000694287	0	0	0	0.000500533	0	0.000710434	0	0	0	0	0	0	0
ASV496	0	0	0.000888042	0	0	0	0	0	0	0	0	0	0	0	0	0	0	0	0	0	0.000452094	0	0	0	0	0	0	0	0	0	0	0.00142087	0	0	0	0	0	0	0	0	0	0	0	0.00196984	0	0	0.00100107	0.00185681	0.00159848
ASV497	0	0	0	0	0	0	0	0	0	0	0	0	0.000161462	0	0.000758872	0	0	0	0	0	0	0	4.84e-05	0	0.000161462	0	0.00100107	0	0.000694287	0.000113024	0	0	0.00248652	0.000177608	0.00256725	0	8.07e-05	0	0	0	6.46e-05	0	0	0	0.00025834	0	0.000177608	4.84e-05	0
ASV498	0	0	0	0	0	0	0	0	0	0	0	0	0	0.000742726	0	0	0.0139665	0	0	0	0	0	0.00059741	0	0	0	0	0	0	0	0	0	0	0	0	0	0	0	0	0	0	0	0	0	0	0	0	0	0
ASV499	0	0	0	0	0.00012917	0	0	0	0	0	0.000306778	0	0.000484387	0	0.00167921	0	0.00368134	3.23e-05	0.000290632	0	0	0	0.000758872	0	0.000113024	0	3.23e-05	0	0.000193755	0	0.000113024	0	0	0	0	0	0.000290632	0	6.46e-05	0.000226047	0.000952627	0.000645849	0	0	0	0	0.00025834	0.00113024	0.000113024
ASV500	0.000387509	0.000629703	0.0019214	0.000193755	0.000758872	0.00295476	0.000419802	0.00263183	0.000661995	0.00155004	0.000435948	0.000322924	0	0	0	0	0	0	0	0	0	0.000306778	0	0	0	0	0	0	0	0	0	0.00025834	0	0	0	0	0	0.000145316	0	0	0	0	0	6.46e-05	0	0.000371363	0	9.69e-05	0
ASV501	0.000322924	0.000565118	0.00113024	0.000113024	0.000500533	9.69e-05	0.00135628	0.000177608	0.000161462	0.000306778	8.07e-05	0	0.00012917	6.46e-05	8.07e-05	6.46e-05	0	0.000371363	0.000226047	0	0.000839603	0.000516679	0.000113024	0	0.000403656	0	0.000452094	0	0.000387509	0	9.69e-05	0.000274486	0.000306778	0.000274486	0.000839603	0.00012917	1.61e-05	0.000193755	9.69e-05	0.000177608	0.00012917	0.000145316	0.000936481	0.000226047	0.000177608	0.000177608	0	1.61e-05	0
ASV502	0	0	0	0	0.0113992	0	0	0	0	0	0.00319695	0	0	0	0	0	0	0	0	0	0	0	0	0	0	0	0	0	0	0	0	0	0	0	0	0	0	0	0	0	0	0	0	0	0	0	0	0	0
ASV503	9.69e-05	0	0	0.00085575	9.69e-05	0	0.000339071	0.00111409	0.00151775	0.00343914	0.000242193	0	0	0	0	0	0	0	0	0	0	0	0	0	0	0	0	0	0	0	0.000113024	6.46e-05	0	4.84e-05	0	0	0	0	0	0	0	0	0.000758872	0.000161462	0	0.000177608	0	0.000113024	0
ASV504	0	0	0	8.07e-05	0	0	0	0	0	0	0	0	0	0	0.000452094	0	0	0.000209901	0	0	0	0	0	0	0	0	0	0	0	0	0	0.000355217	0	0.000274486	0	0	0.000694287	0.000791165	0.000694287	0.000710434	0.000565118	0.00025834	0	0.00109794	0	0.000290632	0.000532825	0	0
ASV505	6.46e-05	0.000113024	0.000161462	0.000435948	0	0	3.23e-05	4.84e-05	1.61e-05	6.46e-05	0	0	0.000613556	0.000113024	0.000984919	0.00111409	0.000807311	4.84e-05	0.000193755	0	9.69e-05	0.000952627	0.000113024	0.000145316	0.000209901	0.00100107	0.0012917	0.00114638	0.000193755	0.00140472	0.000435948	0.000145316	0.000613556	0.000403656	0	0.000161462	0	0	0	0	0	0	0	0	6.46e-05	0	0	0	0.00012917
ASV506	0	0.000629703	0.000339071	0.000306778	4.84e-05	8.07e-05	0	0.000306778	0.000339071	0.000775019	0.000145316	1.61e-05	0.000177608	0	0.000839603	0	4.84e-05	0.000807311	0	0.00012917	0.000177608	0.000306778	0	0.00100107	0	0	4.84e-05	6.46e-05	0	0	0	0.000226047	0	0.00117867	0	0.000274486	0	0	9.69e-05	9.69e-05	1.61e-05	0	1.61e-05	0	0	6.46e-05	0	0.00416573	8.07e-05
ASV507	0	0	0.000645849	0.00151775	0	0	0	0.000823457	0.000581264	0.00268027	0	0	0	0.000209901	0	0	0.00025834	0	0	0.00146931	0	0	0.000339071	0	0	0	0.000322924	0	0.000177608	0	0	0	0.000984919	0.000339071	8.07e-05	0	9.69e-05	9.69e-05	0	0	0	0	0	0	0.00012917	0.000645849	0	6.46e-05	0
ASV508	0	0	9.69e-05	0	0	0.000419802	0	0	0.000145316	0.000113024	0	0.000226047	0	0.000145316	0.000322924	0	0.000403656	0	0.000242193	0	0	0.000145316	0.00012917	0	0.000193755	0.000209901	0	0.000306778	0.00012917	0.000161462	0	0.000419802	0.000419802	0.000322924	0	0.000339071	8.07e-05	0	0.000920335	0.00012917	0.00046824	0.000371363	0.000145316	0.000226047	0.00164691	0.000177608	0.000322924	0.000290632	0.000290632
ASV509	0.00012917	0.000403656	0	0	0	0	0.000226047	0.00025834	0.000322924	0.00025834	0	0	0.000371363	0	0.000339071	0	0.000306778	0	0	0.000113024	0.00179223	0.00134014	0	0	0.000242193	0	0	3.23e-05	0	0.000339071	0.000581264	0.000161462	0.000274486	0.000516679	0	0.000516679	0.000161462	0.00012917	0.000193755	0	0.000807311	0.000629703	0.000177608	0	0	0.000209901	0	0	0.000274486
ASV510	0	0	0	0	0	0	0	0	0	0	0	0	0	0	0	0	0	0	0	0	0	0	0	0	0	0	0	0	0	0	0	0	0	0	0	0	0	0	0	0	0.00272871	0.003423	0	0	0	0	0	0	0
ASV511	0	0	0	0	0	0	0	0	0	0	0	0	0	0	0	0	0	0	0	0	0	0.00117867	0	0	0.00237349	0	0	0	0	0	0	0	0	0	0	0.00226047	0	0	0	0	0	0	0	0	0	0	0.000694287	0.00243808	0
ASV512	0	0	0	0	0	0	0	0	0	0	0	0	0	0	0	0	0	0	0	0	0	0	0	0	0	0	0	0	0	0.000274486	0.000274486	0	0.00891271	0	0	0	0.00169535	0	0	0	0	0	0	0	0.000710434	0	0	0	0.000355217
ASV513	0	0.00816999	0.000177608	0	0	0	0	0	0	0	0.00114638	0	0	0.000500533	0	0	0	0	0	9.69e-05	0.00285788	0	0	0	0	0	0	0	0	0	0	0	0	0	0	0	0	0	0	4.84e-05	0	0	0	0	0	0	0	0	0
ASV514	0	0.00025834	0.000452094	0.000678141	0.000888042	0.000177608	0.000226047	0.00337456	0.000403656	0.000920335	0.000387509	0.000322924	6.46e-05	0.000113024	0.000952627	1.61e-05	0	8.07e-05	0	8.07e-05	0.00012917	0.00025834	8.07e-05	0.000226047	6.46e-05	0.00012917	0	0.00138857	0	0	0.000209901	0.000581264	0.000339071	0	0	0.000193755	0	3.23e-05	0	0	0	8.07e-05	0	0.00012917	0	0	1.61e-05	0	0
ASV515	3.23e-05	0.000484387	0	4.84e-05	0.000161462	0.000339071	6.46e-05	0.000145316	0.000742726	0.000419802	0.00553815	0.000193755	0	0	0	0	0	0.000678141	0.000209901	0	8.07e-05	0.000161462	0.000177608	8.07e-05	0	0	3.23e-05	0	0	0	0	0	0.000274486	0.000209901	0	0.000629703	0.000645849	0	0	0.000581264	0.000113024	0.00012917	0	6.46e-05	0	0	0	0.000161462	0.00012917
ASV516	0.000306778	0.00116253	0.000145316	0.00046824	0.000177608	0.000984919	0.00025834	0.000661995	0.000226047	0.000678141	0	0.000952627	4.84e-05	0.000613556	0.000161462	0	0	0	4.84e-05	6.46e-05	0.00012917	0.000516679	0.000209901	0.000371363	0.000226047	9.69e-05	0	0.00012917	0	0	0.000355217	0.000419802	8.07e-05	0	6.46e-05	0.000113024	0.000193755	0.000177608	9.69e-05	0	0.000113024	0.000274486	0.000113024	0.000226047	0.000355217	1.61e-05	0.000193755	0.000177608	0.000177608
ASV517	0	0	0	0	0	0	0	0	0	0	0	0	0	0	0	0	0.00553815	0.00345529	0	0	0	0	0.00240579	0.00196984	0	0	0	0	0.000209901	0	0	0	0	0	0	0	0	0	0	0	0	0	0	0	0	0	0	0	0
ASV518	0	0	0	0	0	0.00109794	0	0	0	0	0	0	0	0.00025834	0	0	0	0	0	0	0.000290632	0	0	0.000145316	0	0.000290632	0.000193755	0	0.000242193	0.000306778	0	0.000435948	0	0	0	0.000694287	0	0	0	0.000419802	0.000791165	0.00106565	0	0.000613556	0.000371363	0.000355217	0.000435948	0.00164691	0
ASV519	0	0	0.0012917	3.23e-05	0	0	0	0	0.00387509	0	0	0	0	0	0	0	0	0	0	0	0.00072658	0	0.000161462	0.000242193	0	0.000145316	0	0	0	0	0	0	9.69e-05	0.000500533	0	0	0	0.000403656	0	0	0	0	0	0	0	0	0	0.00111409	0.000548971
ASV520	9.69e-05	4.84e-05	0	0	0	0	0.000871896	0.000226047	3.23e-05	0	0	0	0	0	0	0	0	0	0	9.69e-05	0	0	0	0	0	0	0	0	0	0	1.61e-05	0	0	0	0.000710434	8.07e-05	0	0.000322924	0	0.000548971	0.000613556	0.00012917	0.00164691	0.000532825	0	0.00143701	0.000193755	6.46e-05	0.000209901
ASV521	0	0	0	0	0	0	0	0	0	0	0	0	0	0	0	0	0	0	0	0	0	0	0	0.0122873	0	0	0	0	0	0	0	0	0	0	0	0	0	0	0	0	0	0	0	0	0	0	0	0	0
ASV522	0	0	0	0	0	0	0	0	0	0.000500533	0	0	0	0	0	0	0	0	0	0	0	1.61e-05	0	0	0.0017115	0	0	0	0	0.00012917	0.00440792	0	0.000274486	0	0	0	0	0	0.000581264	0	0.00413343	0	0	0	0	0	0.000532825	0	0
ASV523	0	0	0	0	0	0	0	0	0	0	0	0	0	0	0	0	4.84e-05	0.0116091	0	0	0	0	8.07e-05	0	0.000145316	0	0	0	6.46e-05	0	0	0	0.000661995	0	0	0	0	0	0	0	0	0	0.000403656	0	8.07e-05	0	0	3.23e-05	0
ASV524	0	0	0	0	0	0	0	0	0	0	0	0	0.00169535	0.000775019	0.00227662	0.00201828	0.00195369	0	0	0.00085575	0	0	0	0.002761	0	0	0	0	0	0	0	0	0	0	0	0	0	0	0	0	0	0	0	0	0	0	0	0	0
ASV525	0	0	0	0	0	0	0	0	0	0	0	0	0	0	0	0	0	0	0	0	0	0	0	0	0	0	0	0	0	0	0	0	0	0	0	0	0	0	0	0	0	0	0	0	0	0	0	0	0
ASV526	0	0	0.000710434	0	0	0.00072658	0	0	0	0	0	0.000532825	0	0	0	0	0	0	0	0	0	0	0.000645849	0	0	0.00529596	0	0	0	0	0	0.0023412	0	0.000791165	0	0	0	0	0.00059741	0	0	0	0	0	0	0	0	0	0
ASV527	0	0.000226047	0	0.000694287	0.00166306	0.000113024	0.00292247	0.000209901	0	0	0	0	0	0	0	0	0	0	0	0	0	0	0	3.23e-05	0	0.00012917	0	0	0	0	0	0.00569962	0	0.00012917	0	0	0	0	0	0	0	0	0	0.000290632	0	0	0	0	0
ASV528	0	4.84e-05	0.000936481	0.000904188	0	0.000629703	0	0.000226047	0.00182452	0.00012917	0	0.000161462	1.61e-05	0	0	0	0	0	0	0	0	0.000290632	0	0	0	0	0	0	0	0	0	0	0	0	0	0	0.002761	4.84e-05	0.000452094	4.84e-05	0.000613556	8.07e-05	3.23e-05	0	0.00134014	0.000839603	0	0	0.000145316
ASV529	0	0	0	0.000645849	0	0.000387509	0	0	0	0	0	0.000484387	0.000435948	0.000758872	0	0	0.00025834	0.00046824	0	0	0.000226047	0	0	0	0.000242193	0	0.000306778	0.000629703	0.000339071	0	0	0	0.000581264	0.000209901	0.00025834	0	0.000274486	0	0.000516679	0	0.000290632	0.000242193	0.000516679	0.00025834	0.000161462	0	0.00025834	0	0.00025834
ASV530	0	0	0	0	0	0	0.00458553	0	0	0	0	0	0	0	0	0	0	0	0	0	0.00025834	0	0	0	0	0	0	0	0	0	0	0	6.46e-05	0	0.000113024	0	0	0	0.00025834	0	0	0	0	0	0	0	0	0	0
ASV531	0	0	0	0	0.00206672	0	0	0	0	0	0.0066038	0	0	0	0	0	0	0	0	0	0	0	0	0	0	0	0	0	0	0	0.00271257	9.69e-05	0	0.000145316	0	0	0	0	0.00059741	0	0	0	0	0	0	0	0	0	0
ASV532	0	4.84e-05	0	0	0	0	0	0.000419802	0.000145316	0	0	0	0	0	0	0	0	0	0	0	0	0	0	0	0	0	0	0	0	0.000113024	0.000145316	0	0	9.69e-05	0	0.000290632	0	0	0.00012917	0.00109794	8.07e-05	0.00353602	0.000226047	0.000177608	4.84e-05	0.00179223	0	0.00339071	0
ASV533	0.000193755	0.00164691	8.07e-05	0.00059741	0.000145316	0.000694287	0.000193755	6.46e-05	0.000209901	0.00140472	0	0.000161462	8.07e-05	8.07e-05	0.000209901	6.46e-05	0.000145316	0	0	0	0.000387509	0.000161462	6.46e-05	0.000145316	0.000113024	0	6.46e-05	4.84e-05	0	3.23e-05	6.46e-05	8.07e-05	0	0	0	0.000339071	8.07e-05	0.000322924	0.000193755	0	0.000355217	0.00012917	9.69e-05	0.000484387	0.000161462	6.46e-05	0.000226047	0.000161462	0.000242193
ASV534	0	0	0	0	0	0	0	0	0	0	0	0	0.000290632	0	0	4.84e-05	0	0	0	0	0	8.07e-05	0.000322924	0	0	0	0	0	0.000661995	0	0	0	0	0.000242193	0.000177608	0	0	0.00012917	0.000306778	0	0.00557045	0.000226047	0	8.07e-05	0	0.000161462	0.00310007	0.000242193	0
ASV535	0	0	0	0	0	0	0	0	0	0	0	0	0	0	0	0	0.0126425	0.000113024	0	0	0	0	0.000435948	0	0	0	0	0	0	0	0	0	0	0	0	0	0	0	0	0	0	0	0	0	0	0	0	0	0
ASV536	0	0	0	0	0	0	0	0	0	0	0	0	0	0	0	0	0	0	0	0	0	0	0	0	0	0	0	0	0.00121097	0	0	0	0	0	0.011819	0	0	0	0	0	0	0	0	0	0	0	0	0	0
ASV537	0	0	0	0	0	0	0	0	0	0	0	0	0.000355217	0	0	0	0	0	0	0	0	0	0	0.000435948	0	0	0	0	0	0	0	0	0	0	0	0.00765331	9.69e-05	0	0	9.69e-05	3.23e-05	0	0	0	0.000355217	0	0	0.00025834	0.00242193
ASV538	0.0012594	0.000532825	0.000177608	0.000435948	0.00119482	0.000613556	0.000290632	0.000339071	0.000403656	0.000629703	0.003423	0	0	0	0	0	0.000193755	0	0	0	0.000435948	0	0	0	0	0.000145316	0	0	0	0	0	0	0	0	0	0.000322924	0.000548971	0.000145316	0.000177608	0	0	0	0	0	0	0.00025834	0	0.000339071	0.00012917
ASV539	0	0.00497304	0	0.00012917	0.00025834	0	0	0	0	0	0	0	0	0	0	0.000516679	0	0	0	0.000403656	0.00072658	0.00242193	0	0	0	0.000209901	0	0	0	0	0.000193755	0	0	0.000322924	0	0	0	0	0	0	8.07e-05	0.000322924	0	9.69e-05	0	0	0	0	0.000290632
ASV540	0	0.000226047	0	0	0.0015016	0.00143701	0.000387509	0	0	0.000775019	0.00113024	0	0	0	0	0.0038428	0	0	0	0	0	0.000548971	0	0	0	0	0	0	0	0	0	0	0	0	0	0	0	0.00184067	0	0	0	0	0	0	0	0	0	0	0
ASV541	0	0	0	0	0	0	0	0	0	0	0	0	0.000758872	0	0	0	0	0	0	0	0	0	0	0	0	0	0	0.000113024	0	0.000548971	0	0.000516679	0.0015016	0	0.00100107	0.000548971	0.000209901	0	0	0.00059741	0.000435948	0.000371363	0	0.000419802	8.07e-05	0.000661995	0	0.00429489	0
ASV542	0	0	0	0	0	0	0	0	0	0.000209901	0	0.0125456	0	0	0	0	0	0	0	0	0	0	0	0	0	0	0	0	0	0	0	0	0	0	0	0	0	0	0	0	0	0	0	0	0	0	0	0	0
ASV543	0.000936481	0	0	0	0.00174379	0	0	0.000871896	0	0	0	0	0.000968773	0	0	0.00119482	0.000791165	0.000581264	0.000823457	0.00117867	0.000629703	0	0.000371363	0	0.00072658	0	0	0	0	0	0	0	0	0	0	0	0	0	0	0	0.000435948	0	0	0	0	0	0	0	0
ASV544	0.00025834	0	0	0.000306778	0	0	0	0.000242193	0	0	0	0	0	0.00158233	0.00245422	0	0	0	0	0.000339071	0.000807311	0	0	0.00100107	0	0	0	0.00397197	0	0	0	0	0	0	0	0	0	0.00059741	0	0	0	0	0	0	0	0	0	0	0
ASV545	0	0.00775019	0	0	0	0	0	0	0	0	0	0	0	0	0	0	0	0	0	0	0	0	0	0	0	0	0	0	0	0	0	0	0	0	0	0.00025834	0	0	0	0	0	0	0	0	0.00122711	0	0	0.00217974	0
ASV546	0	0	0	0	0	0	0	0	0	0	0	0	0	0	0	0	0	0	0	0	0	0	0.0122065	0	0	0	0	0	0	0	0	0	0	0	0	0	0	0	0	0	0	0	0	0	0	0	0	0	0
ASV547	0	0	0	0	0	0	0	0	0	0	0	0	0	0	0	0	0	0	0	0	0	0	0	0	0.000177608	0	0.00624859	0	0	0	0	0	0.00444021	9.69e-05	0	0	0	0	0	0	0	0	0	0	0.000161462	0	0	0	0
ASV548	0	0	0	0	0	0.011593	4.84e-05	0.00012917	0	0.000193755	0.000161462	0.00085575	0	0	0	0	0	0	0	0	0	0	0	0	0	0	0	0	0	0	0	0	0	0	0	0	0	0	0	0	0	0	0	0	0	0	0	0	0
ASV549	0	0.000532825	0	0	0	0	0.000758872	0	0	0	0	0.000581264	0.000742726	0	0	0	0.000661995	0	0	0	0	0	0.000419802	0	0	0	0	0	0.000678141	0	0	0	0	0	0	0	0	0	0	0	0	0	0	0	0.00226047	0	0	0	0
ASV550	0.000145316	6.46e-05	0.000193755	0	8.07e-05	0	0	0.000452094	8.07e-05	0.00196984	0.000242193	0	0	0	4.84e-05	0	0	0	0.000290632	0.000710434	0.000113024	0	0	0	0	0	0	0	0	0	0	0	0.000145316	6.46e-05	0.000193755	0.00012917	0.000209901	0	0	0	0.000113024	8.07e-05	0.000290632	8.07e-05	0.00306778	0	0	0	6.46e-05
ASV551	0	0.000339071	0	0	0.000661995	0	0	0	0	0.00025834	0	0.000371363	0.00025834	0	0	0	0	0	0	0	0	0	0	0	0	0	0	0	0	0.000791165	0.000532825	0	0.000516679	0	0	0.000871896	0	0	0.000419802	0.000387509	0	0.00127555	0.000387509	0	0.000484387	0.000403656	0	0.00140472	0
ASV552	0	0	0	0	0	0	0	0	0	9.69e-05	0	0	0	6.46e-05	0	0	0	0	0	0	0.000145316	0.000161462	0	0	0	0.000484387	4.84e-05	0.00282559	0	0	0.000242193	0.0029709	0.000339071	0.003423	0	0.000339071	0	0	0	0	0	0	0	0.000177608	0	0.000113024	0	0	0
ASV553	0	0.000371363	0.000419802	0.000274486	0.00185681	0.000613556	0	0.00059741	0.00403655	0.000791165	0.00251881	0.000823457	0	0	0	0	0	0	0	0	0	0	0	0	0	0	0	0	0	0	0	0	0	0	0	0	0	0	0	0	0	0	0	0	0	0	0	0	0
ASV554	0	0	0	9.69e-05	0	0	0	0	0	0	0.00046824	0	0	0	0.000113024	0	0	0	0.000193755	0	0	0	0	0.00167921	0	0	0	0	8.07e-05	0	1.61e-05	0.00865437	0	0	0	0.000113024	0	0	0	0	0	0	0	0.000290632	0	0	0	0	0
ASV555	0	0	0	0	0	0	0	0	0	0	0	0	0.00046824	0.00012917	0.000209901	0.00678141	0.000904188	3.23e-05	8.07e-05	9.69e-05	0.000145316	0.000403656	0	0	0.00046824	8.07e-05	9.69e-05	0	0.000661995	0	0	0	0	0	0	0	0	0	0	0	0	0.000516679	0	0	0	0	0	0	0
ASV556	0	0	0	0	0.00762102	0	0	0	0	0	0.0027933	0	0	0	0	0	0	0	0	0	0	0	0.00111409	0	0	0	0	0	0	0	0	0.000452094	0	0	0	0	0	0	0	0	0	0	0	0	0	0	0	0	0
ASV557	0	0	0	0	0	0	0	0	0.00046824	0	0	0	0	0	0	0.0025834	0	0	0	0	0	0.00229276	0	0	0	0	0.00353602	0	0	0	0	0	0.00114638	0	0	0	0	0	0	0	0	0	0	0	0	0	0	0	0.00101721
ASV558	0	0	0	0.00477928	0	0	0	0	0	0.00632932	0	0	0	0	0	0	0	0	0	0	0	0	0	0	0	0	0	0	0	0	0	0	0	0	0	0	0	0	0	0	0	0	0	0	0	0	0	0	0
ASV559	0	0.00012917	6.46e-05	0.00012917	0	0	6.46e-05	0	0	0	0	0	0	0.000516679	0	0.000145316	0	0.000758872	0	0	0	0.000403656	0.00025834	9.69e-05	0	0	0	0	0.000661995	0	0	0.0012594	0.000339071	0	0.000145316	0.000807311	0.000242193	0.000484387	9.69e-05	0	0	0.000322924	0	0.000403656	0.00113024	0	0	0	0.000710434
ASV560	0	0.00122711	0.000936481	0	0	0	0	0	0	0.00703975	0	0	0	0	0	0	0	0	0	0	0	0	0	0	0	0.000274486	0	0	0	0	0	0.00124326	0	0.000661995	0	0	0	0	0	0	0	0	0	0	0	0	0	0	0
ASV561	0.000839603	4.84e-05	0	0.00046824	0	0.000871896	6.46e-05	8.07e-05	0	0	0	8.07e-05	0	0	0.000661995	0	0	0	0	4.84e-05	0.000113024	0	0	0	0.00156618	0	0.000387509	0	0.000113024	0	0.00012917	0	0	0	0	0.000387509	0	0.000145316	0	0	0.000661995	0.0015016	0	0	0	0	0	0.000209901	0
ASV562	0	0	0	0	0	0	0.000177608	0	0	0	0	0.000500533	0	0	0	0	0	0	0	0	0	0	0	0	0	0	0	0	0	0	0	0	0	0	0	0	0.00923564	0	0	0	0	0	0.000629703	0	0	0	0	0	0.000516679
ASV563	0	0	0	0	0	0.000161462	0	0.00025834	0	0	0	0	0.000290632	0	0	0	0	0	0.000177608	0	0	0	0	0	0	0	0	0	0	0	0	6.46e-05	0	0	0.00101721	0	9.69e-05	0.000484387	0.000823457	0.000306778	0.00334227	0.000113024	0	0.000242193	0.000161462	0.00012917	0.0025834	0	0
ASV564	0	0	0	0	0	0	0	0	0	0	0	0	0.00631317	0	0	0	0	0	0	0	0	0	0	0	0.00463397	0	0	0	0	0	0	0	0	0	0	0	0	0	0	0	0	0	0	0	0	0	0	0	0
ASV565	4.84e-05	0	9.69e-05	4.84e-05	0	0	0	0.000177608	0.000387509	6.46e-05	0	0	0	0	0	0.000322924	0	0	0	0	0	0	0	0.000177608	0	0	0	0	0	0.00200213	0	0.00012917	8.07e-05	0	0	0	0	0	0	0	0	0.0036329	0	0	6.46e-05	0	0	9.69e-05	0
ASV566	0	0	0	0	0	0	0	0	0	0	0	0	0	0	0.00121097	0.000226047	0	0.000661995	0	0	0.000290632	0	0.000322924	0	0	0	0.000355217	0.000419802	0.000452094	0	0	0.00025834	0.000193755	0.000661995	0	0	0	0.000306778	0	0	0.000226047	0.00308393	0	0	0	0	0	0.000161462	0
ASV567	0	0.00146931	0	0	0	0.0019214	0.000645849	0	0	0.00303549	0	0	0	0	0	0	0	0	0	0	0.000775019	0.00161462	0	0	0	0	0	0	0	0	0	0	0	0	0	0	0.000742726	0	0	0	0.000661995	0	0	0	0.000419802	0	0	0	0
ASV568	0	0	0	8.07e-05	0	0	0.000581264	0.000419802	0	4.84e-05	9.69e-05	6.46e-05	1.61e-05	8.07e-05	0	0	0.000177608	0	0.000274486	4.84e-05	0	0.000177608	0	0.000161462	0	0	0	0	0	4.84e-05	0.000161462	0	0.000113024	0	0	0.00012917	9.69e-05	8.07e-05	0	3.23e-05	0.000161462	0	9.69e-05	0.000775019	0	0.000274486	0.00203442	0.000694287	0
ASV569	0	0	0	0	0	0.000936481	0	0	0	0	0.00025834	0	0	0	0	0	0	0	0	0	0	0	0	0.00944554	0	0	0.000145316	0	0	0	0	0	0	0	0	0	0	0	0	0	0	0	0	0	0	0	0	0	0
ASV570	0	0.00973617	0.000823457	0	0	0	0	0	0	0	0	0	0	0	0	0	0	0	0	0	0	0	0	0	0	0	0	0	0	0	0	0	0	0	0	0	0	0	0	0	0	0	0	0	0	0	0	0	0
ASV571	4.84e-05	0.0036329	0	0	0	0	0.00222818	0	0	6.46e-05	0	0	4.84e-05	0	0	0	0	0	0	0	0	0	0	0	0	0	0	0	0	0.00135628	0	0	0	0	0	0.00148545	0	0	0	0	0.000226047	0	0	0.00025834	0	0	0.0010818	0	0
ASV572	0	0	0	0	0	0	0	0	0	0	0	0	0	0	0.00865437	0	0.00293861	0	0	0	0	0	0	0	0	0	0	0	0	0	0	0	0	0	0	0	0	0	0	0	0	0	0	0	0	0	0	0	0
ASV573	0	0.000403656	0	0.000758872	0.00230891	0	0.000306778	0.000242193	0	0.000355217	0	0	0	0.000710434	0	0.000888042	0	0	0.00025834	0	0	0	0.000532825	0	0.000984919	0	0	0	0.00180838	0	0	0.000274486	0	0	0	0	0	0.000419802	0	0	0.000145316	0	0.000209901	0	0	0.00012917	0	0	0
ASV574	0	0	0	0	0	0	0	0	0	0	0	0	0	0	0.000758872	0	0.000209901	0	0	0	0.00912261	0.000113024	0	0	0	0	0	0	0	0	0.000193755	0	0	0	0	1.61e-05	0	0	0	0	0	0	0	0	0	0	1.61e-05	0	0
ASV575	0	0.00268027	0	0	0	0	0.00208286	0	0	0.000629703	0.00012917	0	0.000532825	0	0	0	0.000645849	0	0.000694287	0	0	0	0.000742726	3.23e-05	0.00025834	0	0	0	8.07e-05	0	0.00216359	0	0	0	0	0	0	0	0	0	0	0	0	0	0	0	0	0	0
ASV576	0	0	0	0	0.00122711	0.0010818	0.00012917	0	0	0	0.00012917	0	0	0	0	0	0	0	0	0	0	0	0	0	0	0	0	0	0	0.00477928	0	0	0	9.69e-05	0	0.000193755	0	0.000678141	0.000500533	0	0	0	0	0.000209901	0	0	0	0	0
ASV577	0	0	0	0	0	0.0021313	0	0	0	0	0	0.000177608	0.00155004	0.000435948	0	0	0	0	0	0.000113024	0	0	0	0	0	0	0	0.000645849	0.00012917	0	0	0	0	0	0	0	0	0	0	0	0.000113024	0	0	0	0	0	0	3.23e-05	0.000322924
ASV578	0	0.00119482	4.84e-05	0.0025511	0.000306778	0	0.00175994	0	0	0.00182452	0.00012917	6.46e-05	0	0	0	0	0	0	0	0	0	0	0	0	0	0	0	0	0	0	8.07e-05	0	0	0	0	0	0	0.000193755	0	0	0	0	0	8.07e-05	3.23e-05	4.84e-05	6.46e-05	0.000113024	0
ASV579	0	0	0	0	0.00072658	0	0	0	0	0	0.00174379	0.000742726	0	0.0017115	0.0012594	0	0	0	0	0.000629703	0	0.00106565	0	0	0	0	0	0	0	0	0	0	0	0	0	0	0	0	0	0.000516679	0.000629703	0	0	0	0	0	0.000581264	0	0
ASV580	0	0.000387509	0	0	0.00130784	0.00209901	0.000758872	0.000516679	0	0	0.00529596	0	0	0	0	0	0	0	0	0	0	0	0	0	0	0	0	0	0	0	0	0	0	0	0	0	0	0	0	0	0	0	0	0	0	0.000355217	0	0	0
ASV581	0.000226047	0.000355217	0	0	0.00085575	0	0.000500533	0.000742726	0.00193755	0.000807311	0.00264798	0	0.000435948	0	0	0	0	0	0	0	0.000435948	0.000952627	0.000484387	0	0.000548971	0	0	0	0	0	0	0	0	0	0	0	0	0	0	0	0	0	0	0	0	0	0	0	0
ASV582	0	0	0	0	0.0111247	0	0	4.84e-05	0.00012917	0	0	0	0	0	0	0	0	0	0	0	0	0	0	0	0	0	0	0	0	0	0	0	0	0	0	0	0	0	0	0	0	0	0	0	0	0	0	0	0
ASV583	0	0	0	0	0.000371363	0	0	0	0	0	0.0100429	0	0	0	0	0	0	0	0	0	0	0	0	0	0	0	0	0	0	0	0	0	0	0	0	0	0	0	0	0	0	0	0	0	0	0	0	0	0
ASV584	0.00012917	8.07e-05	0	0.000242193	4.84e-05	0.000226047	9.69e-05	0.0029709	0	0.000161462	0	6.46e-05	0	0	3.23e-05	0	0.000177608	0	0.000355217	0.00012917	6.46e-05	0	4.84e-05	0	0	1.61e-05	0	0	0	0	0.00012917	0.000113024	0	4.84e-05	0	0.000678141	0	0	0	0	0	0	0.000419802	0.00158233	0.000161462	0	0	0.000209901	0.000161462
ASV585	0	0	0.00631317	0	0	0	0	0	0.00423031	0	0	0	0	0	0	0	0	0	0	0	0	0	0	0	0	0	0	0	0	0	0	0	0	0	0	0	0	0	0	0	0	0	0	0	0	0	0	0	0
ASV586	0	0	0	0	0	0.00222818	0	0	0	0	0	0.00915491	0	0	0	0	0	0	0	0	0	0	0	0	0	0	0	0	0	0	0	0	0	0	0	0	0	0	0	0	0	0	0	0	0	0	0	0	0
ASV587	0	0	0	0	0	0	0	0	0	0	0	0	0	0.00025834	0.000984919	0	0.000500533	0	0.00025834	0	0.000387509	0	0	0.000274486	0	0	0.000871896	0.000629703	0	0.00119482	0	0	0.000484387	0.000435948	0	0.000306778	0	0.000435948	0	0	0	0.000500533	0	0.000387509	0.000581264	0	0	0	0.000387509
ASV588	0	0.00117867	0.000742726	0.00085575	0.00230891	0	0	0	0.000807311	0	0.00100107	0	0	0	0.000419802	0	0.00135628	0	0	0	0	0	0	0	0	0	0	0	0.00100107	0	0	0	0	0	0	0	0	0	0	0	0.000435948	0	0	0	0	0	0	0	0
ASV589	0	0	0	0.000581264	0.000145316	0.000371363	0.000161462	0.000290632	0.000355217	0.000306778	0.000565118	0.00025834	0	0	0	0	0	0	0	0	0	0	0	0	0	0	0	0	0	0.00180838	0	0	0	0	0	0	0	0	0	0	0	0.00263183	0	0	0	0.000161462	0	0	0
ASV590	0	0	0	0.000387509	0	0	0.000435948	0	0	0.00158233	0.00175994	0	0	0	0	0	0	0	0	0	0	0	0	0	0	0	4.84e-05	0	0	0	0	0	0	0	0	0	0	0	0.0036329	0	0	0	0	0	0.00072658	0	0	0.000145316	0
ASV591	0	0	0	0	0	0	0	0	0	0	0	0	0	0	0.00397197	0	0	0	0	0	0.000791165	0	0	0	0	0	0	0	0	0	0	0	0	0	0	0	0	0	0.000678141	0	0	0.00025834	0	0	0.00229276	0	0	0.000322924	0.000661995
ASV592	0	0	0.000823457	0	0	0	0	0.000403656	0	0	0	0	0	0	0	0	0	0	0	0	0.000419802	0	0	0	0.000403656	0.000209901	0	0	0.000516679	0	0	0	0	0	0	0	0	0	0.000290632	0.000355217	0.000371363	0.000710434	0.000274486	0.000419802	0.000661995	0	0.000403656	0.000242193	0.000371363
ASV593	0	0	0	0	0	0	0	0.000581264	0	0	0	0.000387509	0	0	0	0	0	0	0	0	0	0	0	0	0	0	0	0	0	0	0	0	0	0	0	0	0.000645849	0.000387509	0.00046824	0	0.00190525	0	0.00122711	0.000419802	0.000968773	0	0.00169535	0	0
ASV594	0	0	0	0.0010495	0.000371363	0.000548971	0	0.000484387	0.000710434	0.000484387	0.000532825	0.000242193	0	0	0	0	0	0	0	0	0	0	0	0	0	0	0	0	0	0	0	0.000355217	6.46e-05	4.84e-05	0.00145316	0.000807311	0	0	0	0	0	0	0	0.00101721	0	0.00025834	0	0	0
ASV595	0	0	0.00658766	0	0	0	0	0	0.00330998	0	0	0	0	0	0	0	0	0	0	0	0	0	0	0	0	0	0	0	0	0	0	0	0	0	0	0	0	0	0	0	0	0	0	0	0	0	0	0	0
ASV596	1.61e-05	0	0	0	0	0	0	0	0	0	0	0	0.0029709	0	0.000355217	0.00201828	0	0	0.000177608	0	0.000629703	0.00059741	0	0.00012917	0.000274486	0.000177608	0.00111409	8.07e-05	0.000193755	0	0	0	0.00059741	0.000290632	0	0	0	0	0	0	0	0	0	0	0	0	0	0	0
ASV597	0	0	0	0	0	0	0	0	0	0	0	0	0	0	0	0	6.46e-05	0	0	0	0	0	0.000193755	0	0	0	8.07e-05	0	0.000403656	0	0	6.46e-05	0	4.84e-05	0.000177608	0	0	0	3.23e-05	0	0.00369748	0.000161462	6.46e-05	0.000371363	3.23e-05	0.000113024	0.00392353	0.000322924	0
ASV598	0	0	0	0	0	0	0	3.23e-05	0	0	0	0.000113024	0	0	0	0	0	0	0	0	0	0	0	0	0	0	0	0	0	0	9.69e-05	0	0	0	0	0	0	0	0	0	0.00012917	9.69e-05	0.00423031	0.00121097	0.00174379	0.000290632	0.000532825	0	0
ASV599	0	0	6.46e-05	0	0.000113024	0.000226047	0.000145316	0.000274486	0	0.00763716	0.00146931	0	0	0	0	0	0	0	0	0	0	0	0	0	0	0	0	0	0	0	9.69e-05	0	0	0	0	0	0.00012917	0	0	0	0	0	0	0	0	0	0	0	0
ASV600	9.69e-05	0.00138857	0.00159848	0.00046824	0.000548971	0.00025834	0.00106565	0.000226047	0.000274486	0.000500533	0.00012917	0.000145316	0	0.000145316	0	6.46e-05	0	0	0	0	0	0	0	0	0	0.00012917	0	0	0	0.000161462	0	9.69e-05	0	9.69e-05	8.07e-05	0.00012917	0	0	4.84e-05	0	0	0.000516679	0	0	0	0.000193755	0	0.000274486	0.000242193
ASV601	0	0	0	0	0	0	0	0	0	0	0	0	0	0	0	0	0	0	0	0	0	0	0	0.000984919	0	0	0.000419802	0	0	0	0.00148545	0	0	0.000710434	0	0.000435948	0	0.00153389	0	0	0	0	0	0.0010818	0	0	0.000403656	0.000387509	0
ASV602	0.000581264	0	0	0	0.0012917	0	0.000516679	0	0.000516679	0	0.00592566	0	0	0	0.000209901	0	0	0	0	0	0	0	0	0	1.61e-05	0	0	0	0	0	0	0	0	0	0	0	0	0	0	0.000226047	0	0	0	0	0.000371363	0	4.84e-05	0	6.46e-05
ASV603	0	0	0	0	0	0	0	0	0	0	0	0	0	0	0	0	0	0	0	0	0	0	0	0	0	0	0	0	0	0	0	0	0	0	0	0	0	0.00942939	0	0	0	0	0	0	0	0	0	0	0
ASV604	0.000532825	0.00119482	0.000419802	0	0	0	0.000355217	0	0	0.000355217	0	0	0	0	0	0.000209901	0	0	0	0	0.000435948	0.000645849	0.000209901	0	0.000839603	0	0	0	0	0	0	0	0	0.000645849	0	0	0.00046824	0.000322924	0.0010495	0	0.000355217	0	0	0.000209901	0	0	0	0.000306778	0
ASV605	0	0	0	0	0	0	0	0	0	0	0	0	0	0	0	0	0	0	0	0	0	0	0	0	0	0.00253496	0	0	0	0	0	0.00670068	0	0	0	0	0	0	0	0	0	0	0	0	0	0	0	0	0
ASV606	0.000548971	0	0	0.000209901	0	0	0	0	0	0	0	0.000306778	0	0	0	0	0	0	0	0	0	0	0	0	0	0	0	0	0	0	0	0	0	0.000484387	0	0.000484387	0	0	0	0	0	0.000290632	0	0	0	0	0.000936481	0.00589337	0
ASV607	0	0	0	0	0	0	0	0	0	0	0	0	0	0	0	0	0	0	0	0	0	0	0	0	0	0	0	0	0	0.0012594	0	0.000355217	0.000193755	0.000274486	0.000871896	0	0	0	0	3.23e-05	0	0.00242193	0	0.000775019	0.000226047	0.000274486	0	0	0
ASV608	0	0	0	0	0	0	0	0	0	0	0	0	0	0	0	0.00860594	0	0	0	0	0	0	0	0	0	0	0.000161462	0	0	0	0	0	0	0	0	0	0	0	0	0	0	0	0	0	0	0	0	0	0
ASV609	0	0	0	0	3.23e-05	0	0.000161462	0	0	0	0	0.000113024	0	8.07e-05	0	0	0	0.000113024	9.69e-05	0	0.000145316	0.000161462	0	0.000177608	4.84e-05	0	0	6.46e-05	0	0	0.000161462	4.84e-05	0	6.46e-05	0	4.84e-05	0.000145316	0.000629703	0.000274486	0.000581264	0.000322924	0.000177608	0.000177608	0.00059741	0.000161462	8.07e-05	0	0.000193755	0.000565118
ASV610	0	0	0	0	0	0	0	0.00012917	0.000322924	0	0	0	0	0.00724965	0.000209901	0	0.000209901	0	0.000193755	0.00138857	0	0	0	0	0	0.000161462	0	0	0	0	0	0	0	0	0	0	0	0	0	0	0	0	0	0	0	0	0	0	0
ASV611	0	0	4.84e-05	1.61e-05	0.00303549	0.00280944	0	0	0.0025834	0	0	0.00195369	0	0	0	0	0	0	0	0	0	0	0	0	0	0	0	0	0	0	0	0	0	0	0	0	0	0	0	0	0	0	0	0	0	0	0	0	0
ASV612	0	0	0	0	0	0	0	0	0	0	0	0	6.46e-05	0	0	0	0	0	0	0	0	0	0	0.00907418	0	0	0	0	0	0	0	0	0	0	0	0	0	0	0	0	0	0	0	0	0	0	0	0	0
ASV613	0	8.07e-05	0.00046824	0	0	0	4.84e-05	0	0.000209901	0.00025834	0.000145316	0	6.46e-05	0.00012917	0.000161462	0.000177608	0.000209901	0	0	0	0	8.07e-05	0	9.69e-05	0.000161462	9.69e-05	4.84e-05	0.00240579	0.000226047	0.000193755	8.07e-05	0.00012917	0.000161462	0.000306778	0	8.07e-05	0.000161462	0.000387509	0.000274486	0	0.000242193	0.000242193	0	0.000306778	0.000161462	0	0.000177608	0.00012917	0
ASV614	0	0	0.00012917	4.84e-05	0	0	0	0	0.000242193	0.00159848	0	0	0	0	0	0	0	0	0	0	0	0	0	0	0	0	0	0	0	0	0	0	0	9.69e-05	0	4.84e-05	0	0	0	6.46e-05	0	0.000113024	0	3.23e-05	0	0.00670068	8.07e-05	0	0
ASV615	0	0.000145316	0	0	0	0	0	0.00012917	9.69e-05	0.00012917	0.00103336	0	0	0	0	0	0.000387509	0	0	0	0	0.000306778	0.000113024	0	8.07e-05	0.000613556	0	0.000581264	0	9.69e-05	0.000290632	9.69e-05	0.000710434	0.00046824	0.000435948	0	0	0	0.000209901	0	4.84e-05	9.69e-05	0	0	0.00179223	0	0	0.000435948	0.000145316
ASV616	0	0	0.00059741	0	0.00059741	0.00072658	0	0.000209901	0	0	0	0	0	0	0.000984919	0.00100107	0	0	0	0.000242193	0.000339071	0.000355217	0.000242193	0	0	0	0	0	0	0	0.000710434	0	0	0	0	0	0	0	0	0	0	0.0010818	0.000661995	0.00046824	0	0	0.000403656	0	0
ASV617	0.000871896	0.00134014	0.000613556	0	0.000209901	0	0.000403656	0.000419802	0	0	0	0	0.000613556	0	0.000694287	0.000581264	0.000629703	0	0.000387509	0	0.000516679	0	0.000678141	0	0	0	0	0.000823457	0	0	0	0	0	0	0	0	0	0.000484387	0	0	0	0	0	0	0	0	0	0	0
ASV618	0	0	0.00568347	0	0	0	0	0	0.0036329	0	0	0	0	0	0	0	0	0	0	0	0	0	0	0	0	0	0	0	0	0	0	0	0	0	0	0	0	0	0	0	0	0	0	0	0	0	0	0	0
ASV619	0	0	0	0	0	0	0	0	0	0	0	0	0	0.000177608	0	0	0	0	0	0	0	0	0	0	0	0.0062163	0	0.000274486	0	0	0	0.0017115	0	0	0	0	0	0	0	0	0	0	0	0	0	0	0	0	0
ASV620	0.000435948	0.000645849	0.000355217	0.000306778	0.00025834	0.00046824	0.000419802	0.000177608	0.000629703	0.000532825	0.000435948	0.000371363	0.000177608	0.000274486	0.000355217	0	0	0	0.000193755	0	0	0	0	0.000145316	0	0	0	0.000177608	0	0.000209901	0.000113024	0.000161462	0	0	0	0	0	0	0.000242193	0	0	0.000209901	0	0.000145316	0	0.000403656	0.000645849	0	0
ASV621	0	0	0	0	0	0	0	0.00046824	0	0	0	0.000113024	0	0.000145316	0	0	0	0	0	0	0	0	0	0	0	0.000145316	0	0	0	0.000161462	0.00012917	0.000322924	0	0	0	0	0.00221203	0.000371363	0	0.00012917	0.000161462	0.00148545	0.000209901	0.000516679	0	0	0.000209901	0.000226047	0.000242193
ASV622	0	0	0	0	1.61e-05	0	4.84e-05	0.00539284	0	0	0	4.84e-05	4.84e-05	0.000306778	0	0	0	0	0	0	0	0	0	4.84e-05	0	0	0	0	0	0	0	0	0	0	0	1.61e-05	0.000209901	0	0	0	0	0.00113024	0	0	8.07e-05	0.000177608	0	0	0.00184067
ASV623	0	0	0	0	0	0	0	0	0	0	0	0	0	0	0	0	0	0	0	0	0	0	0	0	0	0	0	0	0	0	0	0	0	0	0	0	0	0	0	0	0.00169535	0.00132399	0	0	0	0	0.0015016	0.00166306	0
ASV624	0	0	8.07e-05	0	0	0	0	0.000145316	0.000113024	0.000775019	8.07e-05	0	0	0.000581264	0	1.61e-05	6.46e-05	0.000629703	0	4.84e-05	0	0	0	0	0	0.00429489	4.84e-05	0.000113024	0	0	0	0.000532825	8.07e-05	0	0	0.000936481	0	3.23e-05	0	0	0	0	0	0	0	0	0	0	0
ASV625	0	0	0	0.000113024	0.000113024	0	0	0.000113024	8.07e-05	8.07e-05	0.00846062	3.23e-05	0	0	0	0	0	0	0	0	0	0	0	0	0	4.84e-05	0	0	0	0	0	0	0	0	0	0	0	0	0	0	0	0	0	0	0	0	0	0	0
ASV626	0	0	0	0	0	0	0	3.23e-05	0	0	0	0	0	0	0	0	3.23e-05	0.00012917	0	0	0	0	0	0.000758872	0	0	0	0	0	8.07e-05	0	0	0	0	0	0	0	0	0	0	0	0.000209901	0	0	0	0	0	0	0
ASV627	0	0	0	0	0	0	0	0	0	0	0	0	6.46e-05	0.00452094	0	0	0.00012917	0	0	0	0	0	0	0	0	0.00012917	0	0	0	0.00117867	0	0	4.84e-05	0	0	0.00290632	0	0	0	0	0	0	0	0	0	0	0	0.000145316	0
ASV628	0	0	0.000419802	0	0	0	0	0	0	0	0	0	0	0	0	0	0.000548971	0	0	0	0	0	0	0	0	0	0	0.0010495	0.000322924	0	0	0.00025834	0	0.000452094	0	0	0	0.000484387	0.000452094	0	0.000290632	0	0.000484387	0	0.000290632	0.000516679	0	0.00025834	0.00025834
ASV629	0	0	0.000274486	0	0.000226047	0	0	0.000113024	0	0.00187296	0	0.00686214	0	0	0	0	0	0	0	0	0	0	0	0	0	0	0	0	0	0	0	0	0	0	0	0	0	0	4.84e-05	0	0	0	3.23e-05	0	0	0	0	0	0
ASV630	0	0	0	0	0	0	0	0	0	0	0	0	0	0.000500533	0.000548971	0.00025834	0.000613556	0.0010818	0	0	0	0.00025834	0.000678141	0.000871896	0.00025834	0.000226047	0	0	0.000306778	0	0.000161462	0	0	0.000322924	0	0.00012917	0.000145316	0	0	0.000290632	0	0.000209901	0	0	0	0.00187296	0	0	0
ASV631	0	0	0	0	0	0.000161462	0	0	0.0010495	0	0	0	0	0	0.000500533	0	0	0	0	0	0	0	0	0	0	0	0.00571576	0	0.000113024	0	0	0	0.000694287	0	0	0	0	0	0	0	0	0	0	0	0	0	0	0	0
ASV632	0	0	0	0	0	0	0	0	0	0	0	0	0	8.07e-05	0.00695902	0	0	0	0	0	0	0	0	8.07e-05	0	0	0.00216359	0	0	0	0	0	0	0	0	0	0	0	0	0	0	0	0	0	0	0	0	0	0
ASV633	0	0	0	0	0	0	0	0	0	0	0	0	0	0	0	0	0	0	0	0	0	0	0	0	0	0	0	0.000952627	0	0	0	0	0.000322924	0.00784706	0	0	0	0	0	0	0	0	0	0	0	0	0	0	0
ASV634	0	0	0	0.00188911	0	0	0	0	0	0	0	0	0.00121097	0	0	0	0	0	0	0	0.000888042	0	0	0	0	0	0	0	0	0.000113024	0.00227662	0	0	0	0	0	0	0	0	0	0	0	0.0010495	0	0	0	0	0.000355217	0
ASV635	0	0	0	0	0	0	0.000387509	0	0	0	0	0	0	0	0	0	0	0	0	0	0	0	0	0	0	0	0	0	0	0	0	0	0.000226047	0	0.00858979	0.00046824	0	0	0	0	0	0	0	0	0	0	0	0	0
ASV636	0	0	0.000177608	0	0.00103336	0	0	0.000226047	0.000516679	0.00025834	0.000565118	0.000807311	9.69e-05	0.000113024	0	0.000177608	0	0	0.000274486	0	0.000242193	0	4.84e-05	8.07e-05	0.0015016	0.0019214	0.000113024	0	0	0	0	0.000452094	0	0	0	0	0	0.000226047	0	0	0	0	0	0	0	0	0	0	0
ASV637	0	0	0	0.000209901	0	0.00285788	0	0	0.000904188	0.000226047	0.000694287	0.000871896	6.46e-05	0.000242193	0	0	0	0	4.84e-05	0.000177608	8.07e-05	0	0.00289017	0	0	0	0	0	0	4.84e-05	9.69e-05	0	6.46e-05	0	0	0	0	0	0	0	0	0	0	0	0	0	0	0	0
ASV638	9.69e-05	0	0.000581264	9.69e-05	0.000113024	0.000193755	0.00059741	0.000742726	0.0015016	0	6.46e-05	0.000435948	0.000936481	0	8.07e-05	0	0	0	0.00145316	0	0	0	0	0	0	0	0.000177608	0	0	0	3.23e-05	0	0.000581264	0	0	0	0	0	0	0	0	0	0	0	0	6.46e-05	0	1.61e-05	0.000226047
ASV639	0	0	0	0	0.000355217	0	0	0	0	0	0	0	0	0	0.000242193	0	0	0	0	0	0	0	0	0	0	0	0	0.00350373	0	0.000306778	0	0	0	0.002761	0	0	0	0	0	0	0	0	0	0	0	0	0	0	0
ASV640	0	0	0	0	0	0	0.000274486	0.000387509	0	0	0	0	0	0	0	0	0	0	0	0	0	0	0	4.84e-05	0	0	0	0	0	8.07e-05	0.000306778	0	0.00114638	0	0	0.000226047	0	0	0	0	4.84e-05	9.69e-05	0.00444021	0	0.000161462	0.000403656	0	0.000322924	0
ASV641	0	0	0	0	0	0	0	0	0	0	0	0	0	0	0	0	0	0	0	0	0	0.000871896	0	0.000306778	0.00059741	0	0	0	0	0	0	0	0	0	0	0	0.000371363	0	0.000387509	0.000452094	0	0	0	0.000177608	0	0.00216359	0.000290632	0.000613556	0.000306778
ASV642	0	0	6.46e-05	0	0.000322924	0	0	0	0	0	9.69e-05	0	0.000145316	0	0	0	0	0.000435948	0.00012917	0.000823457	0	0.000371363	0.000306778	0	0	0	0	0	0	0	0	0.00515064	0	0	0	0.000193755	0	0	0	0	0	0	0	0.000113024	0	0	0	0	0
ASV643	0	0	0	0	0	0	0	0	0	0	0	0	0	0	0.000161462	0	0	0	0	0	0	0	0	0	0	0	0	0	0	0	0.000984919	0	0	0	0	0	0	0	0	0	0.000807311	0	0.00314851	0.0015016	0	0	0	0	0
ASV644	0	0	0	0	0.00837989	0	0	0	0	0	0.00103336	0	0	0	0	0	0	0	0	0	0	0	0	0	0	0	0	0	0	0	0	0	0	0	0	0	0	0	0	0	0	0	0	0	0	0	0	0	0
ASV645	0	0	0	0	0	0	0	0.000371363	0.000161462	0	0	0	0.000193755	0	0	0	0	0	0	6.46e-05	0	0	0	0.000145316	0	0.00113024	0	0	0	0.000209901	0	0.00151775	0.00301934	6.46e-05	0	0	0	0	0	0	0.000339071	0.000161462	0	0	0.00012917	0	0	0.000565118	0
ASV646	0	0	0	0	0	0	0	0	0	0	0	0	0.000871896	0.000678141	0.00137243	0.00122711	0	0	0	0	0.000484387	0	0	0	0	0.000484387	0.000419802	0	0	0	0.00121097	0	0	0	0	0	0	0.000952627	0	0	0	0	0.000500533	0	0	0.000565118	0	0	0
ASV647	0	0	0	0	0	0	0	0	0	0	0	0	0	0	0	0.000984919	0	0	0	0	0	0	0	0	0	0	0	0.00203442	0	0	0	0	0	0	0	0	0	0	0	0.000613556	0	0.000177608	0	0	0	0	0	0.00271257	0
ASV648	0	0	0	0	0	0	0	0	0.000387509	0.00012917	0.000419802	0	0	8.07e-05	0.000581264	0.000145316	0	0	0.00025834	0.000226047	0	0.000565118	0	0	0	0.000177608	0	0.000387509	0	0	0	0.00238964	0.000355217	0	0	0	0	0	0	0.000355217	0	0	0	0.000435948	0	0	0	0	0
ASV649	0	0	0	0	0	0.00109794	0	0	0	0	0	0.00248652	0	0	0	0	0	0	0	0	0	0	0	0	0	0	0	0	0	0.000791165	0	0	0	0.00124326	0	0	0	0	0	0	0	0	0	0	0	0	0.000516679	0	0
ASV650	0	0	0	0	0	0	0	0	0	0	0	0	0.000177608	0	0	0.00221203	0.00138857	0	6.46e-05	0	0	0.000904188	0	0	0.00025834	0	0	0.00174379	0	0	0.000548971	0	0	0.00025834	0	0	0	0	0	0	0	0.000419802	0	0	0	0	0	0.000661995	0
ASV651	0	0	0	0.000435948	0.000871896	0	0	0	0	0.000775019	0.000565118	0	0	0	0	0	0.000645849	0.000403656	0	0	0	0	0	0	0.000645849	0	0	0	0	0	0.00113024	0	0	0	0	0	0	0	0	0	0	0.0010495	0	0.000516679	0	0	0	0.0012917	0
ASV652	0	0	0.000387509	0	0	0	0	0	0	0	0	0	0	0	0	0	0	0	0	0	0	0	0	0	0	0	0.000791165	0	0.000484387	0	0	0	0	0	0	0	0.00059741	0	0.000371363	0	0.00072658	0	0	0	0	0	0.000613556	0	0.000306778
ASV653	0	0	0.000758872	0.000161462	0.000145316	0	0	4.84e-05	0.00250266	0	0	0	0	0	0	0	0	0	0	0	0	0	0	0	0	0	0	0	0	0	0	0	0	0	0	0	0	0	0.000193755	0	0.00372978	0	0	0	0	0	0.00111409	0	0
ASV654	0	0	0	0.000290632	0	0.00174379	8.07e-05	0	0.00138857	0	9.69e-05	0.000177608	4.84e-05	0	0	0	0.000209901	0	0	0	0.000161462	0	0	0	0	0	0	0	0	0	0	0	0	0	0	0.000177608	0	0.000548971	0.000161462	0	0	0	0	0	3.23e-05	0.000113024	0	0.00182452	0.000226047
ASV655	0	0	0	0.00206672	0	0	0	0	0	0.00626473	0	0	0	0	0	0	0	0	0	0	0.000355217	0	0	0	0	0	0	0	0	0	0	0	0	0	0	0	0	0	0	0	0	0	0	0	0	0	0	0	0
ASV656	0	0	0	0	0	0	0	0	0	0	0	0.000193755	0	0	0	0	0	0	0	0	0	0	0	0	0	0	0	0	0	0	0.000387509	0	0	0	0	0.000920335	0.000968773	0	0.000339071	0	0	0.000742726	0.00140472	0.000516679	0	0.000516679	0.000758872	0.00025834	0.000306778
ASV657	0	0	0	0	0	0	0	0	0	0	0	0	0	0	0	0	0	0	0	0	0	0	0	0	0	0.00151775	0	0	0.00610327	0	0	0.00161462	0	0	0	0	0	0	0	0	0	0	0	0	0	0	0	0	0
ASV658	0	0	0	0	0	0	0	0	0	6.46e-05	0	6.46e-05	0.000904188	0.00172765	0.000177608	0.00158233	0.000419802	0	3.23e-05	0	0.000242193	0.000419802	0.000242193	0	0.000758872	0.00103336	3.23e-05	0	0.000807311	0	0	0	0	0	0	0	0	0	0	0	0	0	0	0	0	0	0	0	0
ASV659	9.69e-05	0.000484387	0	0	0.0010818	0.000209901	0.000145316	0.00364905	9.69e-05	0.000904188	8.07e-05	6.46e-05	0	0	0	0.000113024	0	0	0	0	0	0.000290632	6.46e-05	0	0	0	0	0	0	0	0.000145316	0	0	6.46e-05	0	0.000161462	4.84e-05	0	0.000193755	0	3.23e-05	0	0	0	0	0	0	6.46e-05	0.000177608
ASV660	0	0	0	0	0	0	0	0	0	0	0	8.07e-05	0	0	0	0	0	0	0.000209901	0.000581264	0	0	0	0	0	0	0	0	0	0	0	3.23e-05	0.000145316	0	0	0	0	0	0.00012917	0	0.000177608	0	0	0.00114638	0.00368134	0.000387509	9.69e-05	8.07e-05	0.000113024
ASV661	0.00025834	0	0	0	0.000145316	0	0	0.000209901	0.000242193	0	0.000435948	0	0.000290632	0.000209901	0.000452094	0.000226047	0.000209901	0.000419802	0	0.000145316	0.000226047	0	0	0	0.000274486	0	0	0	0	0.000145316	0	0	0.000226047	0	0	0.000355217	0	0	0	0	0	0.000419802	0.000742726	0	0.000290632	0	0	0	0.000435948
ASV662	0	0	0	0	0	0	0	0	0	0	0	0	0	0	0	0	0	0	0	0	0	0.00153389	0	0	0	0	0	0	0	0	0	0	0	0	0.000145316	0	0	0	0.00293861	0	0	0	0	0	0	0	0	0	0.00146931
ASV663	0.000661995	0.00145316	0	0.00456938	0	0	0.0010495	0	0	0	0	0	0	0	0	0	0	0	0	0	0	0.000161462	0	0	0	0	0	0	0	0	0	0	0	0	0	0	0	0	0	0	0	0.000161462	0	0	0	0	0	0	0
ASV664	0	0	0	0	0	0	0	0	0	0	0	0	0	0	0	0	0	0	0	0	0	0	0	0	0	0	0	0	0	4.84e-05	0	0	0	0	0	0	0	0.00245422	0.000193755	0	0	0.000322924	0	0	0	0	0	0.000161462	4.84e-05
ASV665	0	0	0	0	0	0	0	0	0	0	0	0	0	0	0	0	0	0	0	0	0	0	0	0	0	0	0	0	0.00976846	0	0	0	0	0	0	0	0	0	0	0	0	0	0	0	0	0	0	0	0
ASV666	0	0	0.000742726	0	0	0	0	0	0.000274486	0	0	0	0	0	0	0.000322924	0	0	0	0	0	0	0	0	0	0	0	0	0	0	0	0	0	0.000613556	0	0	0	0	0.00143701	0.00180838	0	0	0	0	0.00195369	0.000775019	0	0	0
ASV667	0	0	0	0.000387509	0	0	0	0	0	0	0	0	0.00124326	0	0	0	0	0	0	0	0	0	0	0	0.00148545	0	0	0	0	0.0010495	0	0	0	0.00012917	0	0	0	0	0	0	0	0.00175994	0	0.000145316	9.69e-05	0	0	0	0
ASV668	0	0	0	0	0	0	0	0	0	0	0	0	0	0	0	0	0	0	0.00707204	0	0	0.000403656	0	0	0	0	0	0	0	0	0	0	0	0	0	0	0	0	0	0	0	0	0	0	0	0	0	0	0
ASV669	0	0	0	0	0	0	0	3.23e-05	0	0	0	0	0	0.000177608	0.00658766	0	0	0	0	0	8.07e-05	0	0	0	0	0	0.000113024	0	0	0.000242193	0	0	0	0.000161462	0	0.000290632	0	0	0	1.61e-05	0	0	9.69e-05	0	0	0	0	0	0.000355217
ASV670	0	0	0	0.000403656	0	0	0	0	0	0	0	0	0	0	0	0	0	0	0	0	0	0	0	0	0	0	0	0	0	0	0	0	0	0	0	0	0	0	0	0	0	0	0	0	0	0	0	0	0
ASV671	0	0	0	0.00749185	0	0	0	0	0	0	0	0	0	0	0	0	0	0	0	0	0	0	0	0	0	0	0	0	0	0	0	0	0	0	0	0	0	0	0	0	0	0	0	0	0	0	0	0	0
ASV672	0	0.000694287	0	0	0	0	0	0	0	0.000371363	0	0.000888042	0.00012917	0.000177608	0	0	0	0	0	0	0.00124326	0.000290632	0.000242193	0	0	0	0	0	0	0	0.00117867	0	0	0	0	0	0	0.000500533	0	0	0.000371363	0	0.000226047	0	0.000355217	0.00072658	0	0	0
ASV673	0	0	0	0	0	0	0	0	0	0	0.000791165	0	0	0	0.00521523	0	0	0	0	0	0.00242193	0	0	0	0	0	0	0	0	0	0	0	0	0	0	0	0	0	0	0	0	0	0	0	0	0	0	0	0
ASV674	0	0	0	0	0	0	0	0	0	0	0	0	0	0	0	0	0	0	0	0	0	0	0	0	0	0	0	0	0	0	0	0	0.00185681	0.00198599	0.0047147	0	0	0	0	0	0	0	0	0	0	0	0	0	0
ASV675	0	0	0	0	0	0	0	0	0	0	0	0	0	0	0	0	0	0	0	0	0	0	0	0	0	0	0	0	0	0	0	0	0	0.00148545	0	0	0	0	0	0	0	0	0	0	0	0	0	0	0
ASV676	0	0	0	0.00127555	0	0	0	0	0	0.00106565	0	0	0	0	0	0	0	0	0.000290632	0	0	0	0	8.07e-05	0	0	0	0	0	0.00164691	0.000500533	0	0	0.000209901	0	0.0015016	0	0	0	0	0	0	0	0	0	0	0	0	0
ASV677	0	0.00114638	0.00351988	0	0.000242193	0	0	0	0.00164691	0	0	0	0	0	0	0	0	0.000290632	0	0	0	0	0.00122711	0	0	0	0	0	0	0	0	0	0	0	0	0	0	0	0	0	0	0	0	0	0	0	0	0	0
ASV678	4.84e-05	0	0	4.84e-05	0.00175994	0.000145316	0	0.000226047	0.000209901	0.000177608	0.000661995	0.000161462	0.000145316	0.000177608	0	0	0	0	8.07e-05	6.46e-05	0.000161462	0	6.46e-05	0	0	0	0	0	0	0	0.000290632	8.07e-05	0	0.000193755	0	0.000661995	0.000193755	0.000145316	0.000193755	3.23e-05	0.000339071	9.69e-05	0.000113024	0	0.000145316	9.69e-05	0	0.000209901	0.000161462
ASV679	0	0	0	0	0	0	0	0	0	0	0	0.000145316	0	3.23e-05	0	0	0	0.00025834	0	0	0.000226047	0	0.000645849	0	0	0	0	0	0	0	0	0.000113024	0.00547357	0	0	0	0	0	0	0	0	0	0	0	0	0	0	0	0
ASV680	0	0	0	0	0	0	0	0	0	0	0	0.000242193	0	0	0	0	0	0	0	0	0	0	0.000936481	0	0.000161462	0	0	0	0	0	0.000193755	0	0	0	0	0	0.00163077	0.000113024	0	0	0	0	0.00114638	0	0	0	0	0	0.00153389
ASV681	8.07e-05	0	3.23e-05	0	0.00161462	0.000161462	0	0.000193755	8.07e-05	0	8.07e-05	0	3.23e-05	0	0	0.000613556	0.000742726	0	6.46e-05	4.84e-05	0	0	0.000274486	0	0	0	9.69e-05	0.000419802	0	0	0	0	0	0	0	0	0.00012917	3.23e-05	0.000274486	0	9.69e-05	9.69e-05	0	0	0	0	0	1.61e-05	0.000242193
ASV682	0.000290632	6.46e-05	0	0	0.000177608	0.000242193	0.000145316	0	0	0	0	0.00012917	0	8.07e-05	0.00025834	0	0	0.000113024	3.23e-05	4.84e-05	0.000274486	0	8.07e-05	0	8.07e-05	0.00012917	0.000177608	0	0.00012917	0.000113024	0.000145316	6.46e-05	0.00161462	0	0	0.000322924	0	0.000161462	0.000274486	0.000355217	0	4.84e-05	0	0.000629703	0.000242193	9.69e-05	0.000177608	0	0
ASV683	0	0	0.00547357	0	0	0	0	0	0.00209901	0	0	0	0	0	0	0	0	0	0	0	0	0	0	0	0	0	0	0	0	0	0	0	0	0	0	0	0	0	0.000242193	0	0	0	0	0	0	0	0	0	0
ASV684	0	0	0.000339071	0	0.000371363	0	0	0.000209901	0.000984919	6.46e-05	0	0	0	0.000871896	0	0	0.00012917	0	0	0	0	0	0	0.00025834	0.000435948	0.00117867	0.000371363	0	0.000532825	0.000177608	9.69e-05	0.000161462	0.000403656	0.000775019	0	0	0	3.23e-05	0	0	0	6.46e-05	0	0	0	0.000290632	0	0	0
ASV685	0.000339071	0.000113024	0	0	0	0	0.00620015	0.00106565	0	0	0.000177608	0	0	0.000145316	0	0	0	0	0	0	0	0	0	0	0	0	0	0	0	0	0	0	0	0	0	0	0	0	0	0	6.46e-05	0	0	0	0	0	0	0	0
ASV686	0	0	0	0	0	0	0	0	0	0	0	0	0	0	0	0	0	0	0	0	0	0	0	0	0	0	0	0	0	0	0	0	0	0	0	0	0	0	0.0048923	0	0	0	0	0	0	0	0.00201828	0.000613556	0
ASV687	0	0	0	0	0	0	0	0	0	0	0	0	0	0	0	0	0.00587722	0	0	0	0	0	0.00130784	0	0	0	0	0	0	0	0	0	0	0	0	0	0	0.00127555	0	0	0	0	0	0	0	0	0	0	0
ASV688	0.000419802	0	0	0	0	0.00046824	0	0.000226047	0	0.000500533	0.000355217	0	0	0	0	0	0	0.000161462	0	0	0.00174379	0.000355217	0.000339071	0.000339071	0	0	0	0	0	0	0	0	0	0	0	0	0	0.00025834	0.000339071	0	0	0	0.00072658	0.00012917	0.000387509	0	0.000161462	0.000242193	0.000193755
ASV689	0	0	0	0	0.00849291	0	0	0	0	0	0	0	0	0	0	0	0	0	0	0	0	0	0	0	0	0	0	0	0	0	0	0	0	0	0	0	0	0	0	0	0	0	0	0	0	0	0	0	0
ASV690	0	0	0	0	0.00285788	0.000500533	0	0.00158233	0.00025834	0	0	0	0.000419802	0.000435948	0	0	0	0	0	0	0	0	0	0	9.69e-05	0	0	3.23e-05	0	0	0.00148545	0	0	0	0	0	0	0.000226047	0	0	0.000306778	0	0	0	0	0	0	0	0
ASV691	0	0	0.000113024	0	0.00347144	0.000290632	0	0.000742726	0	0.00106565	0.00140472	0.000209901	0	0.000177608	0	0	0	0	0	0	0	0	0	0	0	0	0	0	0	0.000290632	0	0	0	0	0	9.69e-05	0	0	0	0	0	0	0	0	0	0	0	0	0
ASV692	0	0	0	0	0	0	0	0	0	0	0	0	0	0	0	0	0	0	0	0	0	0	0	0	0	0	0	0	0	0	0	0	0	0	0.000226047	0	0	0	0.000387509	0	0.00264798	0	0	0	0	0	0	0	0
ASV693	0	0	0	0	0	0	0	0	0	0	0	0	0	0	0.00025834	0	0	0.00306778	0	0	0	0	0	0	0.000452094	0	0.0012594	0.000888042	0	0.000532825	0.000322924	0	0.000177608	0.000516679	0	0	0.000339071	0	8.07e-05	0	0	0	0	0	0	0	0	0	0
ASV694	0	0	0	0	0	0	0	0	0	0	0	0	0	0	0	0	0	0	0	0	0	0	0	0	0	0	0	0	0	0	9.69e-05	0	0	0	0	0	0	0	0	0	0.000193755	0	0.000193755	0	0	0	0	0	0.000193755
ASV695	0	0	0	0	0	0	0	0	0	0.000161462	0	0	0	0	0	0	0	0	0	0	0.000645849	0	0	0	0	0	0	0	0	0	3.23e-05	0.000177608	0	0	0	0	0.00059741	0	0	0	0	0	3.23e-05	4.84e-05	0	0	0	0	0
ASV696	0	0.00127555	0	0.00114638	0	0.00214745	0	0	0	0.000403656	0.000177608	0	0	0	0	0.000322924	0	0	0	0	0.00109794	0.000888042	0	0	0	0	0	0	0	0	0	0	0	0	0	0	0	0	0	0	0	6.46e-05	0	6.46e-05	0	0	0	0	3.23e-05
ASV697	0	0	0	0	0	0	0	0	0	0	0	0	0	0	0	0	0	0	0	0	0	0	0	0	0	0	0	0	0	0	0	0	0	0	0	0.000710434	0.00111409	0.00085575	0	0.000565118	0	0	0.00153389	0.00072658	0	0	0	0	0.00101721
ASV698	0	0	0	0.000177608	0	0	0	4.84e-05	0	0.000371363	0	0	0	0.000532825	0.000145316	0	0.00012917	0.000678141	0	0.000645849	0	0	0.000419802	0	0.00012917	0	0.000920335	0	0	0	3.23e-05	0	0.000807311	0	0	6.46e-05	0	0	0.000177608	0	0	0	0	0	6.46e-05	0	0	0.00166306	0
ASV699	0	0	0	0	0	0	0	0	0.000242193	0	0	0	0	0	0	0	0	0	0	0	0	0	0	0	0	0	0	0	0	0	0	0	0	0	0	6.46e-05	0	0	6.46e-05	0.00702361	0.00012917	0	0	0	0	0	0	0	0
ASV700	0	0	0	0	0	0	0	0	0	0	0	0	0	0	0	0	0	0	0	0	0	0	0	0	0	0	0	0	0	0	0	0	0	0	0	0.000339071	0	0	0	0	0	0	0	0.000113024	0	0	0	0.0068137	0
ASV701	4.84e-05	0	0	0	0	4.84e-05	0	0	0	0	0	1.61e-05	0.00116253	0.000242193	0	9.69e-05	0	0	0.00387509	0.000226047	6.46e-05	0	0	0	8.07e-05	0.00025834	0	6.46e-05	0	0.000193755	0	0.000306778	0	9.69e-05	0	0	0.000113024	0	4.84e-05	0	0	9.69e-05	0	0	0	0	0	0	0
ASV702	9.69e-05	0.00163077	9.69e-05	0	0	0	0	0	0	0.00106565	9.69e-05	0.000209901	0	6.46e-05	0.000355217	0	0	0	0.000290632	0	0	0	0	0	0.000710434	0	0	0	0	0	0.000355217	0	0	0	0	0.000435948	0	0	0.000113024	0	0.000403656	0	0.000226047	0	0	0	0	0	0
ASV703	0	0	0	0	0	0	0	0.000548971	0	0	0	0	0	0	0	0	0	0	0	0	0	0	0	0.000339071	0	0.00146931	0.000758872	0	0	0	0	0	0.000871896	0	0	0	0	0	0	0	0	0	0	0	0	0	0.00206672	0	0
ASV704	0	0	0	0	0	0	0	0	0	0	0	0	0	0	0	0	0.000823457	0	0	0	0	0	0.000403656	0	0	0	0	0.00500533	0.00059741	0	0	0	0	0.000209901	0	0	0	0	0	0	0	0.000113024	0	0.000306778	0	0	0	9.69e-05	0
ASV705	0	0	0	0	0	0	0	0	0	0	0	0	0.000355217	0	0.00379436	0	0.000548971	0	0	1.61e-05	0	0.000920335	0.000274486	0	0.000161462	0	0.00127555	0	0.000419802	0	0	0	0	0	0	0	0	0	0	0	0	0	0	0	0	0	0	0	0
ASV706	0	0	0	0	4.84e-05	0	0	0	0	0	8.07e-05	0	0.000484387	0.00135628	0.000306778	4.84e-05	0.000193755	0	0.000209901	0.000226047	9.69e-05	0.00012917	8.07e-05	0	0.000226047	0.000274486	0	0	0	0	0	0	0	0	0	0	0	0	0	0.000565118	0	0	0	0	0	0	0	0	8.07e-05
ASV707	0	0	0	0	0	0	0	0	0	0	0	0	0	0	0	0	0	0	0	0	0	0	0	0	0	0	0	0	0	0.00285788	0	0	0	0	0	0	0	0	0	0	0	0.00456938	0	0	0	0	0	0	0
ASV708	0	0	0	0	0	0	0	0	0.000242193	0	0	0	0	0	0	0	0	0	0	0.00305164	0	0	0	0	0	0	0	0	0	0	0	0	0	0	0	0	0	0	0.000274486	0	0	0	0	0	0.00085575	0	0	0	0
ASV709	0	0	0	0.00465011	0	0	0	0	0	0	0	0.00158233	0	0	0	0	0	0	0	0	0	0	0	0	0	0	0	0	0	0	0	0	0	0	0.000839603	0	0	0	0	0	0	0	0	0	0	0	0	0	0
ASV710	0	0.00479543	0	0	0	0	0.00245422	0	0	0	0	0	0	0	0	0	0	0	0	0	0	0	0	0	0	0	0	0	0	0	0	0	0	0	0	0	0	0	0	0	0	0	0	0	0	0	0	0	0
ASV711	0	0	0	0	0	0	0	0	0	0	0	0	0	0.00547357	0	0	0	0	0	0.00193755	0	0	0	0	0	0	0	0	0	0	0	0	0	0	0	0	0	0	0	0	0	0	0	0	0	0	0	0	0
ASV712	0	0	0	0	0	0.00311622	0	0	0	0	0	0	0	0	0	0	0	0	0	0	0	0	0	0	0	0	0	0	0	0	0	0	0	0	0	0	0	0	0	0	0	0	0	0	0.00400426	8.07e-05	0	0	0
ASV713	0	0	0	0	0	0	0	0	0	0	0	0	0.000629703	0.000694287	0	0	0.00121097	0	0	0	0	0	0	0	0	0	0	0.000548971	0	0	0	0	0	0	0	0.00142087	0	0	0	0	0.00137243	0	0	0	0.000629703	0	0	0	0
ASV714	0	0.0070559	0	0	0	0	0	0	0	0	0	0	0	0	0	0	0	0	0	0	0	0	0	0	0	0	0	0	0	0	0	0	0	0	0	0	0	0	0	0	0	0	0	0	0	0	0	0	0
ASV715	0	0	0	0	0	0	0	0	0	0	0	0	0	0	0	0	0	0	0	0	0	0	0	0	0	0	0	0	0	0.00177608	0	0	0	0	0	0	0	0	0	0	0	0.00339071	0	0	0	0	0	0	0
ASV716	0	0	0	0	0	0	0	0	0.000193755	0	0	0	0.000645849	0	0	0	0.00130784	0	0	0	0	0	0.000548971	0	0	0	0	0	0	0.000403656	0.000161462	0	0	0	0	0.000807311	0	0	0.00114638	0	0	0	0	0	0	0	0	0	0.00025834
ASV717	0	0	0	0	0	0	0	0	0	0	0	0	0	0	0	0	0	0	0.000306778	0.000209901	0	0	0	0	0	0	0	0	0	0	0	0.000435948	0	0.000177608	0.00334227	0	0	0	0	0	0	0	0	0.00117867	0.000113024	0.000209901	0	0	0
ASV718	0	0	0	0	0	0	0	0	0	0	0	0	0	0	0	0	0	0	0	0	0	0	0	0	0	0	0	0	0	0	0	0	0	0	0	0	0	0	0	0.00251881	0	0	0	0	0	0	0	0	0
ASV719	9.69e-05	0	9.69e-05	6.46e-05	0	0.000548971	0	0.000403656	0.000226047	0.000306778	0.000355217	0.000145316	0.00046824	0	0	0.000113024	0	0	0.000145316	0	0	0	0	0.000387509	0	0.00012917	0.000161462	0	0.000113024	0	0.000839603	0.000565118	0.000209901	0.000387509	0	0	0	0.000565118	0.000177608	0	0.000581264	8.07e-05	0	0	0	0	0	0	0
ASV720	0	0	0	0	0	0	0	0	0	0	0	0	0	0	0	0	0	0	0	0	0	0.000290632	0	0	0	0	0	0	0	6.46e-05	0.0046824	0	0	0	0	0	0	0.000452094	0	0	0	0.00177608	0	0	0	0	0	0	0
ASV721	0	0	0	0	0	0	0	0	0	4.84e-05	0	0	0	0	0	0	0.000274486	0	0	3.23e-05	0	0	0	6.46e-05	0	0	0.000355217	0	0.00229276	0	0	0.000145316	0.000645849	0	0.000984919	0.000226047	0	0	0	3.23e-05	0	0	0.00219589	0	0	0	0	0	0
ASV722	0	0	0	0	0.000387509	0	0	0	0	0	9.69e-05	0	0	0	0	0	0	0	0	0	0	0	0	0	0	0	0	0	0	0.000193755	0	0	0.000113024	8.07e-05	0	0.000145316	0	6.46e-05	0.000791165	0.000839603	0.000177608	0.000613556	8.07e-05	0	0.000807311	0	0	0.00012917	0
ASV723	0	0	0	0	0	0	0	0	0	0	0	0	0	0	0.00547357	0	0	0	0	0	0	0	0	0	0	0	0.00187296	0	0	0	0	0	0	0	0	0	0	0	0	0	0	0	0	0	0	0	0	0	0
ASV724	0	0	0	0	0	0	0	0	0	0	0	0	0	0.0042626	0	0	0	0	0	0.00012917	0	0	0	0	0	0	0	0	0	0	0	0	0	0.000888042	0	0	0	0	0	0	0.00196984	0	0	0	0	3.23e-05	0	0	0
ASV725	0	0	0.00268027	0	0	0	0	0	0.00169535	0	0.00116253	0	0	0	0	0	0	0	0	0	0	0	0	0	0	0	0	0.000177608	0	0	0	0	0	0	0	0	0	0	0	0	0	0	0	0.000984919	0	0	0	0	0
ASV726	0	0	0	0	0	0	0	0	0	0	0	0	0	0	0	0	0	0	0	0	0	0	0	0	0	0	0	0	0	0	0	0	0	0	0	0	0	0	0	0	0.00274486	0	0	0	0	0	0.00414958	0	0
ASV727	0	0	0	0	0	0	0	0.000209901	0	0	0	0.000193755	0	0	0.00113024	0	0	0	0	0	0.00103336	0	0	0	0	0	0	0	0	0	0	0	0	0	0	0	0	0.000209901	0	0	0.000823457	0.000807311	0	0	0	0	0.000548971	0.00116253	0.000565118
ASV728	0.000226047	0	0	0	0	0	0	0.000548971	0	0	0	0	0.000113024	0	0	8.07e-05	0.00196984	0	9.69e-05	0	0	0	8.07e-05	0	0	0.00122711	4.84e-05	0	0	0.000387509	0	0	0	0	0	0.000322924	0	0	0	0	0	0	0	0	0	0	0	0	0
ASV729	0	0	0	0	0	0	0	0	0	0	0	0	0	0	0	0	0	0	0	0	0	0	0	0	0	0	0	0	0	0	0	0	0	0	0	0.00653922	0	0	0	0	0	0	0	0	0	0	0	0.000387509	0
ASV730	0.000161462	0.00025834	0	0.000145316	0.000791165	0.0012594	0	0.000274486	0.000177608	0.000306778	0.00303549	0.000629703	0	0	0	0	0	8.07e-05	0	1.61e-05	0	0	4.84e-05	0	0	0	0	0	0	0	0	0	0	0	0	0	0	0	0	0	0	0	0	0	0	0	0	0	0
ASV731	0	0	0	3.23e-05	4.84e-05	0	0	6.46e-05	9.69e-05	1.61e-05	0	0.00025834	0	0	0	0	0	0	0.000161462	0	0	0	0	0.00025834	0	1.61e-05	0	0	0	0.000435948	0	8.07e-05	4.84e-05	0	0.000694287	0	0	0	0	0.000113024	0.00012917	0.000452094	0	0.000145316	0	0	0.00208286	0	0
ASV732	0	0	0.00477928	0	0	0	0	0	0	0	0	0.00146931	0	0	0	0	0	0	0	0	0	0	0	0	0	0	0	0	0.000484387	0	0	0	0	0	0	0	0	0	0	0	0	0	0	0	0	0	0	0	0
ASV733	0.000113024	6.46e-05	0.000113024	0	0.000113024	9.69e-05	0.00072658	9.69e-05	9.69e-05	0.00012917	0	0.00012917	0.000306778	0	0	0	8.07e-05	0	0.000145316	0	0	0	3.23e-05	4.84e-05	0	0	0	0	0.00103336	0.000387509	0	0	9.69e-05	0	0.000177608	0.00025834	0.000613556	0.000290632	0.000145316	0	0.000161462	0.000177608	8.07e-05	0.00025834	0	9.69e-05	3.23e-05	0.000209901	8.07e-05
ASV734	0	0	0	0	0	0	0	0	0	0	0	0	0	0	0	0	0	0	0	0	0	0	0	8.07e-05	0	0	0	0	0	0	0	0	0	0	0	0	0	0	0.000193755	0	0	0.00582879	0	0	0.00025834	0.000209901	0	0.00012917	0
ASV735	0	0.000242193	0	9.69e-05	0	0.000113024	0	0	0.000113024	0	0.000355217	0.00012917	0.000888042	0	0	0	0	0	0	0	0	4.84e-05	0	0	0	0	0	0.000387509	0.000177608	4.84e-05	0	0.00100107	0	0.00172765	0	0	0	0	0.00046824	0	0.000419802	4.84e-05	0	0.000242193	0	0	0	0	0.000403656
ASV736	0	0	8.07e-05	0.000209901	8.07e-05	0	0	0.000193755	0.00085575	0.000387509	0.000242193	0.000371363	0	4.84e-05	0.000226047	8.07e-05	0.000177608	0	0	9.69e-05	0	0.000161462	0	0	0	0	0	3.23e-05	0	0	0.00012917	0	0.000290632	0.00012917	0	0	8.07e-05	0.000403656	0.000193755	0.000161462	9.69e-05	0	0.000145316	9.69e-05	0	9.69e-05	0	0.00012917	0.00012917
ASV737	0	4.84e-05	0	0.00431104	0	0	0	0	0	0	0	0	0	0.000274486	0	0	0	0	0	0	0	0	0	0	0	0	0	0	0	0	0.000936481	0	0	0	0	0	0	0	0	0	0	0	0	0	0.000694287	0	0	0	0
ASV738	0	0	0	0	0	0	0	0	0	0	0	0	0	0	0	0	0	0	0	0	0	0.000419802	0	0	0	0	0	0	0	9.69e-05	0	0	0	0	0	4.84e-05	0	0	1.61e-05	4.84e-05	0	0.0066361	0	0	0	0	0	0	0
ASV739	0	0	0	0	0.000419802	0.000113024	0	0.000113024	0.000113024	0.00012917	0.00587722	8.07e-05	0	0	0	0	0	0	0	0	0	0	0	0	0	0	0	0	0	0	0	0	0	0	0	0	0	0	0	0	0	0	0	0	0	0	0	0	0
ASV740	0	0	0	0	0	0	0	0	0	0	0	0	0	0	0	0	0	0.00592566	0	0	0	0	0	0.0012917	0	0	0	0	0	0	0	0	0	0	0	0	0	0	0	0	0	0	0	0	0	0	0	0	0
ASV741	0	0	0	0	0	0	0	0	0	0	0	0	0	0	0	0	0	0	0	0	0	0	0	0	0	0	0	0	0	0	0	0	0	0	0	0	0	0	0	0	0	0	0	0	0.00623244	0	0	0	0
ASV742	0	0	0	9.69e-05	0	0	0	0	0	0	0	0	0.00072658	0.00025834	0.000807311	0.000145316	0.000920335	0	0	0	0.000758872	0	0	0	0.00156618	0.00012917	0.000226047	0	0.00140472	0	0	0	0	0	0	0	0	0	0	0	0	0	0	0	0	0	0	0	0
ASV743	0.00347144	0	0	0	0	0	0	0.00313237	0	0	0	0	0	0	0	0	0	0	0	0	0	0	0	0	0	0	0	0	0	0	0	0	0	0	0	0	0	0	0	0	0	0	0	0	0	0	0	0	0
ASV744	0	0	0	0	0	0	0	0	0	0	0	0	0	0	0	0	0	0	0	0	0	0	0	0	0	0	0	0	0	0	0	0	0	0	0	0	8.07e-05	0	0	0	0	0	0	0.00624859	6.46e-05	0	0	0	0
ASV745	0	0	0	0	0	0	0	0	0	0	0	0	0	0	0	0	0	0	0	0	0	0	0	0	0	0	0	0	0	0	0	0	0.00142087	0	0.000419802	0	0	0	0	0	0	0	0	0	0.00161462	0.000242193	0	0	0
ASV746	0.000371363	0	4.84e-05	0.000226047	0	8.07e-05	0.000661995	0.00106565	0.000322924	0.000403656	0	0.00161462	0	3.23e-05	0	0	0	0	3.23e-05	0.000290632	0	0	0	0	0	0	0	0	0	0	4.84e-05	0	0	0	0	4.84e-05	8.07e-05	0	0	0	0	0	0	0	0.000306778	0.000339071	0	0	1.61e-05
ASV747	0	0	0	9.69e-05	0.000419802	0	0	0	0.000791165	0	0.00148545	0	0	0.00127555	0	0.000113024	0.000694287	0	0	0.000403656	0	0.00072658	0.00012917	0	0	0	0	0	0	0	0	0	0.000226047	0	0	0	0	0	0	0	0	6.46e-05	0	0	0	0	0.000500533	0	0
ASV748	0	0	0	0	0	0.00482772	0	0	0	0	0	0.00256725	0	0	0	0	0	0	0	0	0	0	0	0	0	0	0	0	0	0	0	0	0	0	0	0	0	0	0	0	0	0	0	0	0	0	0	0	0
ASV749	0	0	0	0	0	0	0	0	0	0	0	0	0	0	0	0	0	0	0.00205057	0.000274486	0	0.000516679	0.00381051	0	0	0	0	0	0	0	0	0	0	0	0	0	0	0	0	0	0	0	0	0	0	0	0	0	0
ASV750	0	0	0	0	0	0.000839603	0.000920335	0	0	0	0.000807311	0	0	0	0	0	0	0	0	0	0	0	0.00268027	0	0	0	0	0	0	0	0	0	0	0	0	0	0	0	0	0	0	0.000581264	0	0	0	0	0	0	0
ASV751	0	0	0	0	0	0	0	0	0	0	0	0	0	0	0	0	0	0	0	0	0	0	0	0	0	0	0	0	0	0.00313237	0	0	0	0	0	0.00316466	0	0	0	0	0	0	0	0	0	0	0	0	0
ASV752	0	0	0	0	0	0.0012594	0	0	0	0	0.000113024	0.000145316	0	0	4.84e-05	0	0	0	0	0	0	8.07e-05	0	0	0.000387509	0	0	0	0	0	0.00059741	0	0.000226047	0	0	0	6.46e-05	0	0.000500533	9.69e-05	1.61e-05	0	0	0	0.00121097	0	0.00135628	0	0.000193755
ASV753	0	0	0	0	0	0	0	0	0	0.000775019	0.000435948	0.000952627	0	0	0	0	0	0	0.000209901	0.000387509	0	0	0	0	0	0.000274486	0	0	0	0	0	0	0.000242193	0	0	0	0	0	0	0	0	0	0	0.00114638	0	0	0	0	0
ASV754	0	0	0	0	0	0	0	0	0	0	0	0	0	0	0	0	0	0	0	0	0	0	0	0	0	0	0	0	0	0.00232506	0	0	0	0	0	0.00368134	0	0	0	0	0	0	0	3.23e-05	9.69e-05	0	0	0.000226047	0
ASV755	0.00264798	0	0	0	0	0	0	0.00124326	0	0	0.00145316	0	0	0	0	0	0	0	0	0	0.00146931	0	0	0	0	0	0	0	0	0	0	0	0	0	0	0	0	0	0	0	0	0	0	0	0	0	0	0	0
ASV756	0	0	0.000161462	0	0	0	0	0	0.000242193	0	0	0	0	0	0	0	0	0	0	0	0	0	0	0	0	0.00130784	0	0	0	0.00025834	0	0.00261569	0.000532825	0.000823457	0	0	0	0	0	0	0	0	0	0.000306778	0	0	0	0	0
ASV757	0	0	0	0	0	0	0	0.000161462	0	0	0	0	0	0	0.000355217	0	0	0	0	0	0	0	0	0	0	0	0.00117867	0	0	0	0	0	0	0	0	0	0.000710434	0	0	0.00348758	0	0	3.23e-05	0	0	0	0	0	0
ASV758	0.000403656	0	0.000226047	0	0	0	0	0	0.000678141	0	0.000226047	0	0	0	0	0	0	0	0	0	0	0	0	0.000452094	0	0	0	0	0	0.000435948	0.000290632	0	0.000419802	0	0	0	0	0.000791165	0	0.00012917	0.000306778	0	0.00025834	0.000403656	0.000888042	0	0.000532825	0	0
ASV759	0	0	0	0	0	0.00167921	0	0	0	0	0	0	0	0	0	0	0	0.000452094	0	0	0	0	0	0	0.0012594	0	0	0	0	0	0	0	0	0	0	0	0.00122711	0	0	0	0	0	0	0	0	0	0	0	0
ASV760	0	0	0	0	0	6.46e-05	0.000419802	4.84e-05	0.000161462	0	0.000193755	0.00250266	0	0	0	0	0	0	0	0	0	0	0	0	0	0	0	0	0	0	0	0	0	0	0	8.07e-05	0	0	0	0	0	0	0	4.84e-05	0	0	0	0.000694287	9.69e-05
ASV761	0	0	0	0	0	0	0	0	0	0	0	0	0	0	0	0	0	0	0	0	0	0	0	0	0	0	0	0	0	0	0	0	0.00127555	0	0	0	0	0	0	0	0	0	0	0	0.00224433	0	0	0	0
ASV762	0.00025834	0	0	0	0	0	0	0	0	0	0	0.000161462	0	0	0	0	0	0	0	0	0	0	0	0	0	0	0	0	0	0	3.23e-05	0	0.000242193	0	0	0.000290632	0	0	0	4.84e-05	0.00012917	0	0	0	0.00434333	0.00025834	0	0	0
ASV763	0	0	0	3.23e-05	0	0	0	0.000193755	0	0	0	0	0	0	0	0	0	0	0	0	0	0	0	0	0	0	0	0	0	0	9.69e-05	4.84e-05	0.00012917	0.00558659	6.46e-05	0	0	0	0	0	0	0	0	0	0	0.000193755	0	0	0
ASV764	0	0	0	0	0	0	0	0	0	0	0	0	0	0	0	0	0	0	0	0	0	0	0	0	0	0	0.000209901	0	0	0	0	0	0.000306778	0	0	0	0.00351988	0	0	0	0	0	0	0	0	0	0	0	0.00137243
ASV765	4.84e-05	6.46e-05	0	0.000113024	0.000322924	8.07e-05	0.000145316	9.69e-05	6.46e-05	0.000145316	0	4.84e-05	0.00046824	0.000322924	0.000694287	0	0.000242193	0.000226047	0	0.00059741	3.23e-05	0.000113024	0.00148545	0	0.000306778	4.84e-05	0.000209901	0	0	0	0	0	0	0	6.46e-05	0	0	0.00025834	0	0.000161462	0	0	0	0	0	9.69e-05	6.46e-05	0	0
ASV766	0	0	0	0	0	0	0	0	0	0	0	0	0	0	0	0	0.00390739	0	0	0	0	0	0.00311622	0	0	0	0	0	0	0	0	0	0	0	0	0	0	0	0	0	0	0	0	0	0	0	0	0	0
ASV767	0	0	0	0	0	0	0	0	0	0	0	0	0	0	0	0	0	0	0	0	0	0	0	0	0	0	0	0	0	0	0	0	0	0	0	0.00487616	0	0	0	0	0	0	0	0.000193755	0	0	0	0.000403656	0
ASV768	0	0	0	0	0	0	0	0	0	0	0	0.000193755	0	0	0	0	0	0	0	0.000226047	0	0	0	0	0	0	0	0	0	0	0	0	0	0	9.69e-05	0	0	0	0	0	0	0	0	0.000145316	0	0	0	0	0
ASV769	0	0	0.00012917	0	0	0	4.84e-05	0.000145316	0.000565118	0.000500533	0.000371363	0.000500533	0.000306778	0	0	0	0	0	0	4.84e-05	0.000242193	0	0	0	0.000516679	0	0	0	0	0	0	6.46e-05	0.000306778	0.000177608	0.000274486	0	0	0	0	0	0	0	0	0.000177608	0.000435948	0.000306778	0	0	0
ASV770	0	0	0	0.000177608	0	0	0	0	0	0.00012917	0	0	0.000177608	0	0.000678141	0.000177608	0	0	0	0.000177608	0.000306778	0.000145316	0	0.000161462	0.000226047	0.000274486	0.000419802	0.000209901	0	0.000193755	0.000161462	0.000209901	0.000339071	0.000209901	0	0	0	0	0	0.000193755	0	0	0.000226047	0.000226047	0.000193755	0.000242193	0	0	0
ASV771	0	0	0	0	0	0	0.00658766	0	0	0	0	0	0	0	0	0	0	0	0	0	0	0	0	0	0	0	0	0	0	0	0	0	0	0	0	0	0	0	0	0	0	0	0	0	0	0	0	0	0
ASV772	0	0	0	0	0	0	0	0	0	0	0	0	0	0.0044725	0	0	0	0	0	0	0	0	0	0	0	0.00190525	0	0	0	0	0	0	0	0	0	0	0	0	0	0	0	0	0	0	0	0	0	0	0
ASV773	0	0	0.00174379	0	0	0	0.0017115	0	0.00332612	0	0	0	0	0	0	0	0	0	0	0	0	0	0	0	0	0	0	0	0	0	0	0	0	0	0	0	0	0	0	0	0	0	0	0	0	0	0	0	0
ASV774	0	0	0	0.00461782	0	0	0	0	0	0.00137243	0	0	0	0	0	0	0	0	0	0	0	0	0	0	0	0	0	0	0	0	0	0	0	0	0	0	0	0	0	0	0	0	0	0	0	0	0	0	0
ASV775	0	0	0	0	0	0	0	0.00657151	0	0	0	0	0	0	0	0	0	0	0	0	0	0	0	0	0	0	0	0	0	0	0	0	0	0	0	0	0	0	0	0	0	0	0	0	0	0	0	0	0
ASV776	0	0	0	0	0	0	0	0	0	0	0	0	0	0	0	0	0	0	0	0	0	0	0	0	0	0	0	0.00500533	0	0	0	0	0	0.00124326	0	0	0	0	0	0	0	0	0	0	0	0	0	0	0
ASV777	0	0	0	0	0.00012917	0.000145316	0	0.000113024	0.000419802	0.00581264	0	0	0	0	0	0	0	0	0	0	0	0	0	0	0	0	0	0	0	0	0	0	0	0	0	0	0	0	0	0	0	0	0	0	0	0	0	0	0
ASV778	0	0	0	0	0	0	0.000710434	0	0	0	0	0	0	0.00072658	0	0	0.0012917	0	0	0	0	0.000532825	0	0	0	0	0	0	0	0	0	0	0	0	0	0	0	0	0	0	0	0	0	0	0	0	0	0.000435948	0
ASV779	0.000145316	0	0.00012917	0.000145316	0.000161462	8.07e-05	0	0	0.000419802	0.00251881	0	0	3.23e-05	0	0.000209901	0	0.00012917	0.000177608	0	0	0.000113024	0.000387509	0.000209901	0	8.07e-05	0	0	0	0	0	0	0.000452094	0.000435948	0	0	0.000500533	0	0	0	0	0	0	0	0	0	0	0	4.84e-05	0
ASV780	0	0	0.00116253	0	0	0	0	0	0	0	0	0	0	0	0	0	0	0	0	0	0.00124326	0	0	0	0	0	0	0	0	0	0	0	0.00198599	0	0	0	0	0	0	0	0	0	0	0	0	0	0	0	0
ASV781	0.000968773	0	0.000371363	0.000500533	0.00122711	0	0	0	0	0	0	0	0	0.00156618	0	0	0	0	0	0	0	0	0	0	0	0	0.000839603	0	0	0.000226047	0	0	0	0	0	0	0	0	0	0	0	0	0	0	0	0	0	0	0.000678141
ASV782	0	0.00072658	0	0	0	0	0	0	0	0	0	0	0	0	0	0.000209901	0	0	0	0	0	0	0	0	0	0	0	0	0	0	0	0	0	0	0	0	0	0	0	0	0	0	0	0	0	0	0	8.07e-05	0
ASV783	0	0	0	0	0	0	0	0	0	0	0	0	0.00025834	0	0.000177608	0.00059741	0.000452094	9.69e-05	0	0	0.00114638	0.000145316	0.000193755	0.00256725	0.000209901	0	0	0	0.000387509	0	0	0	0	0	0	0	0	0	0	0	0	0	0	0	0	0	0	0	0
ASV784	0	0	0.000371363	0	0.000161462	0.000532825	0	9.69e-05	0	0.000435948	0.00085575	0.000193755	0.000113024	0	0	0	0	0	0	0	0	0	0.000113024	0	0	3.23e-05	0	0	4.84e-05	0	0	0	0	0	0	3.23e-05	0.000113024	0	3.23e-05	0	0	6.46e-05	1.61e-05	0	0	0	0	0.000274486	0.00222818
ASV785	0	0	0	0	0	0	0	0	0.000581264	0	0	0	0	0	0	0	0	0	0	0	0	0	0	0	0	0	0	0	0	0	0	0	0	0	0	0	0	0.00484387	0	4.84e-05	0	0.000113024	0	0	0	8.07e-05	0	0	0
ASV786	3.23e-05	0	0	0	0	0	0	0	0	0	0	0.000274486	0	0	0	0	0	0	0	0	0	0	0	0	0	0	0	0	0	0	0	0	0	0.00474699	0	0	0	0	0.000888042	0	0	0.00025834	0	0	0	8.07e-05	0	0	0
ASV787	0	0	0	0	0	4.84e-05	0	9.69e-05	0	0.000871896	1.61e-05	0	0	0	0	0.000193755	1.61e-05	0	0	0	0.000145316	0	0	0.00085575	3.23e-05	0	0	0	0	0	0.000209901	0	0	0	0	0	0.000694287	4.84e-05	0.00179223	0	0.000242193	0.000306778	0	3.23e-05	0	0.000193755	0	0	0.000161462
ASV788	0	0.000113024	0.00012917	0.000242193	0	0.00106565	0	8.07e-05	0	0	0	0	0.000452094	0	0	0	0.00012917	0.000484387	0.000161462	0	0	0	0.00059741	0	0	0	9.69e-05	0	0	0	0	0	0	0	0	0	0	0	0.00085575	0.000629703	0	3.23e-05	0	0	0	0.000242193	0	0	0.000355217
ASV789	0	0.00266413	0	0	0	0	0.00146931	0	0	0	0	0	0	0	0	0	0.00209901	0	0	0	0	0	0	0	0	0	0	0	0	0	0	0	0	0	0	0	0	0	0	0	0	0	0	0	0	0	0	0	0
ASV790	8.07e-05	0	0	0	0	0	0	0	8.07e-05	4.84e-05	3.23e-05	0	0.00012917	8.07e-05	0.000355217	9.69e-05	0.000193755	0	6.46e-05	0	0.000145316	9.69e-05	8.07e-05	0	0	6.46e-05	0.000113024	0.00012917	0.000113024	9.69e-05	0.000177608	6.46e-05	0.000161462	8.07e-05	0	0	0.000339071	0.000209901	0.000145316	0	0.000177608	0.000355217	0.000193755	8.07e-05	0.000161462	0.000113024	0	0.000274486	0.000113024
ASV791	0	0	0	0.000113024	0	0	0	0	0	0	0	0	0	0	0	0	0	0.000339071	0	0	0	0	0	0.00547357	0	0	0	0	0	0	0	0	0	0	0	0	0	0	0	0	0	0	0	0	0	0	0	0	0
ASV792	0	0	0	0	0	0.000290632	0	0	0	0	0	0	0	0	0	0	0	0	0	0	0	0	0	0	0	0	0	0	0	0.00351988	0	0.000193755	0	0	0	0.00119482	0	0	0	0	0	0	0	0	0	0	0	0.000209901	0
ASV793	0	0	0	0	0	0	0	0	0	0	0	0	0	0.00046824	0	0	0	0	0	0	0	0	0	0.000226047	0.000355217	0.000290632	0	0.000500533	0.000177608	0.000339071	0.000484387	0.000435948	0.000403656	0.000419802	0	0.000113024	0	0	0.000452094	0	0	9.69e-05	0	0	0.000452094	0.000274486	0	0	0
ASV794	0.000145316	0	0	0	0	0.000339071	0	0	0	0.000387509	0.00100107	0	0	0	0	0.000339071	0	0.000322924	0	0	0	0	0	0.000775019	0.000661995	0	0	0	0	0	0	0.000581264	8.07e-05	0	0	0	0	0.000355217	0	0	0	0	0	0	0.000920335	0	0	0	0
ASV795	0	0.000274486	0	0	0	0	0	0	0	0	0	0	0.000435948	0	0	0.00012917	0.00059741	0	0	0	0	0	0.000226047	0	0	0	0	0	0	0	0	0	0.000645849	0	0	0	0	0	0	0.000209901	0.000306778	0	0	0	0	0	0	0	0
ASV796	0	0	0.000661995	0	0	0	0	0	0.000355217	0	0	0	0	0	0	0	0	0	0	0	0	0	0	0	0	0	0	0	0.00012917	0	0	0	0	0	0	0	0.000435948	0	0	0	0	0	0.000355217	0	0	0	0	0	0
ASV797	0	0	0	0	0.000387509	0.00232506	0	0	0	0	0.00025834	9.69e-05	0	0	0	0	0	0	0	0	0	0	0	0	0	0	0	0	0	4.84e-05	0	0	0	0	0	0	0	0.000484387	0	0	0.000339071	0.00156618	0	0	0	4.84e-05	0.000500533	0.000145316	0
ASV798	0	0	0.000532825	0	0.00185681	0.000613556	0	0	0.00119482	0	0.00122711	0	0	0	0	0	0	0	0	0	0	0	0	0	0	0	0	0.000823457	0	0	0	0	0	0	0	0	0	0	0	0	0	0	0	0	0	0	0	0	0
ASV799	6.46e-05	0.00376207	0.000290632	0.000452094	6.46e-05	0.000113024	0.000274486	0.000355217	0	0.000435948	0	0	0	0	0	0	0	0	0	0	0	0	0	0	0	0	0	0	0	0	0	0	0	0	0	0	0	0	0	0	0	0	0	0	0	0	0	0	0
ASV800	0	0	0	0	0	0	0	0	0	0	0	0	0	0	0	0	0	8.07e-05	0	0	0	0	0.000113024	0	0	0	0	0	0.00012917	0	0	0	0	0	0	0	0.000193755	0	0	0	0	0	0	0	0	0	0	0	0.0053444
ASV801	0.00072658	0	0	0	0.000548971	0.000113024	0	0.00434333	8.07e-05	0	0.000371363	0	0	0	0	0	0	0	0	0	0	0	0	0	0	0	0	0	0	0	0	0	0	0	0	0	0	0	0	0	0	0	0	0	0	0	0	0	0
ASV802	0	0	6.46e-05	0.000145316	0.000177608	0	0.000516679	0	0.000161462	9.69e-05	0.00025834	0.000177608	0.000145316	0.000193755	0	0	6.46e-05	0	8.07e-05	0.000888042	0.00012917	0	0.000500533	0.000161462	0	0	0	0	0	4.84e-05	0	0	0	0.00046824	0	6.46e-05	0.000113024	0.000145316	0	9.69e-05	0.000209901	0	0	0.00046824	0	0	0	0	0
ASV803	0	0	0	0	0	0	0	0	0	0	0	0	0	0	0	0	0	0	0	0	0	0	0	0	0.000339071	0.000290632	0	0	0	0	0.000274486	0.000548971	0	0	0	0.0010495	0	0.00287403	0	0	0	0	0	0.000306778	0	0	0	0	0
ASV804	0	0	0	0	0	0	0	0	0	0	0	0.000161462	0	0.000242193	0.000419802	0	0.00025834	0	0	0.000145316	0.00025834	0	0	0	0	0	0	0.000226047	0	0.000290632	0.00012917	0	0	0.000306778	0	0.00046824	0.000161462	0	0	0	0	0.00059741	0	0	0.000161462	0	0	0	0.000339071
ASV805	0	0	0	0.00536055	0	0	0	0	0	0	0	0	0	0	0	0	0	0	0	0	0	0	0	0	0	0	0	0	0	0	0	0	0	0	0	0	0	0	0	0	0	0	0	0	0	0	0	0	0
ASV806	0	0	0	0	0	0.000452094	0	0	0	0	0	0	0	0	0	0	0	0	0	0	0	0	0	0	0.000613556	0	0	0	0	0.00072658	0	0	0	0	0	0.000694287	0.000274486	0	0.00116253	0	0	0.00109794	0	0	0	0	0	0.000839603	0
ASV807	0	0	0	0	0	0	0	0	0	0	0	0	0	0	0	0	0	0	0	0	0	0	0	0	0	0	0	0	0	0	0	0	0	0	0	0.000678141	0	0	0	0	0	0	0	0	0	0	0	0	0
ASV808	0	0	0	0	0	0	0	0	0	0.00608712	0	0	0	0	0	0	0	0	0	0	0	0	0	0	0	0	0	0	0	0	0	0	0	0	0	0	0	0	0	0	0	0	0	0	0	0	0	0	0
ASV809	0	0.000290632	0	0	0	0.000775019	4.84e-05	0	0	0	0	0	6.46e-05	0.000177608	0	0	0	0	0	0	0	0	0	0	0	0	0	0	0	0	0	0	0	0	0	4.84e-05	4.84e-05	0.000306778	4.84e-05	0	0.000775019	0.000839603	0	0	0	0	0.00185681	0	0
ASV810	0	0	0.000113024	6.46e-05	0.000113024	0.000161462	8.07e-05	0	0	8.07e-05	6.46e-05	0	0.000113024	0.000209901	8.07e-05	0.000145316	0.00012917	0	0.000113024	0	0	0	0	0	0	0.000629703	0.000403656	3.23e-05	0.000274486	4.84e-05	0	0	0	0	0.000710434	0.000242193	0.00012917	0.000226047	0	0.000177608	0.000387509	9.69e-05	0	0	0	0	0.000710434	4.84e-05	0
ASV811	0	0	0.00012917	0	0.000306778	0	0	0	0	0	0	0.000355217	0	0.000193755	0.000242193	0.000274486	0.000226047	0.00025834	0.000145316	0	0	0	0	0	0	0	0.000161462	0	0	0.000371363	0	0	0.000419802	0	0	0.000242193	0	0.00012917	0	0	0.000226047	0.000306778	0	0.000387509	0.000145316	0	0.000113024	0	0
ASV812	0	0	0	0	0	0.000968773	0	0.000209901	0	0	0	0.000145316	0	0	0	0	9.69e-05	0.000355217	0	0	0	0.000694287	0	0	0.000290632	0	0	0	0	0	0.00122711	0	0	0	0	0	0	0	0.000452094	0	0	0	0.000209901	0	0.00072658	0	0	0	0.000306778
ASV813	0	0	0.00326154	0.00205057	0	0	0	0	0	0	0	0	0	0	0	0	0	0	0	0	0	0	0	0	0	0	0	0	0	0	0	0	0	0	0	0	0	0	0	0	0	0	0	0	0	0	0	0	0
ASV814	0	0.000161462	0.000177608	0	0	0	0	0.000548971	0.00012917	0.000387509	9.69e-05	0	0	0	0	0	0	0	0	0	0	0	0	0	0	0	0	0	0	0	0.000209901	0	0.000113024	0.000193755	0	0.000242193	0.000193755	0.000193755	0.000113024	0	0.000145316	0.000209901	0.000645849	0.000306778	0.000177608	0.000242193	0.000113024	0.00012917	9.69e-05
ASV815	0	0	0	0	0	0.000161462	8.07e-05	0	0	0	0	0	0	0.000177608	0	0	0	0	0	0	0	0	0	0	0	0	0	8.07e-05	0	0.000161462	0	0	0	0	0	0.00025834	0	0	0.00072658	0	0.000242193	0.000403656	0	0.000226047	0.000775019	0	0.000274486	0.000419802	0
ASV816	0	0	0	0	0	0	0	0	0	0	0	0	0	0	0	0.000403656	0	0	0	0	0	0	0	0	0	0	0	0	0	0	0	0.000290632	0	0	0	0	0	0	0	0	0	0	0	0.00156618	0	0	0	0	0
ASV817	0	0	0	0.000113024	0	0	0	0	0	0	0	0	0	0	0.000177608	0	0	0	4.84e-05	0	0	0.00116253	0	0	0	0	0	0	0	0	0	0	0	0	0	0.000710434	0	0	0	0	0.00109794	0.000290632	0	0	0	0.000355217	9.69e-05	0	0
ASV818	0.000581264	0	0	0	0	0	0	0.000419802	0	0	0	0	0	0.00025834	0	0	0	0	0	0.00119482	0	0	0.000242193	0.000500533	0	0	0	0	0	0	0	0	0.000581264	0	0	0	0	0	0.000355217	0.000193755	0	0	0	0	0	0	0	0	0
ASV819	0	0	0	0	0	0	0	0	4.84e-05	0	0	0	0	1.61e-05	0	0	0.00012917	0	0	0	0.00012917	8.07e-05	0	6.46e-05	0.000161462	0	0	0	8.07e-05	0	0	0	0	0.00103336	0	0	8.07e-05	0	0.000161462	6.46e-05	0.000145316	0	0	0	0	8.07e-05	0	0.000113024	0.000371363
ASV820	0	0	0.00172765	0.000742726	0	6.46e-05	0.000113024	0.00208286	0.000904188	0	0	0	0	0	0	0	0	0	0	0	0	0	0	0	0	0	8.07e-05	0	0	0	0	0	0	0	0	0	0	0	0	0	0	0	0	0	0	0	0	0	0
ASV821	0	0	0	0	0	0	0	0	0	0	0	0	0.00116253	0.000403656	0.000371363	0.000113024	0.00113024	0	0.000145316	0	0.000371363	0	0	0	0.0012917	0	0.000113024	0	0.000807311	0	0	0	0	0	0	0	0	0	0	0	0	0	0	0	0	0	0	0	0
ASV822	0	0	0	0	0	0	0	0	0	0	0	0	0	0	0	0	0	0	0	0	0	0	0	0	0.000484387	0	0	0	0	0	0	0.00461782	0	0	0	0	0	0	0	0	0	0	0	0.000629703	0	0	0	0	0
ASV823	0	0	0.000565118	0	0	0.000177608	0.00117867	0	0.000177608	0	0.0027933	0	0	0	0	0	0	0	0	0	0	0	0	0	0	0	0	0	0	0	0	0	0	0	0	0	0	0	0	0.000694287	0	0	0	0	0	0	0	0	0
ASV824	0	9.69e-05	0	0	0	0	0	0	9.69e-05	0	0	0	0.000193755	0.000500533	0	0	0	0.000177608	8.07e-05	0.00237349	0	0	0	0	0	0.00012917	0	0	3.23e-05	0	0	0.000177608	0	9.69e-05	4.84e-05	0.000694287	4.84e-05	0	9.69e-05	0	0	0	0	0	0	0	0	6.46e-05	0.000274486
ASV825	0	0	0	0	0	0	1.61e-05	0	0	0	0	0	0	0	0.00505377	0	0	0	0	4.84e-05	0	0	6.46e-05	0	0	0	8.07e-05	0	0	0	0	0	0	0	0	0	0	0	0	0	0	0	0	0	0	0	0	0	0
ASV826	0	0	0	0	0	0	0	0	0	0	0	0	0.00209901	0.000807311	0	0	0	0	0	0	0	0	0	0	0.0019214	0.000694287	0	0	0	0	0	0	0	0	0	0	0	0	0	0	0	0	0	0	0	0	0	0	0
ASV827	0	0	0	0	0	0	0	0	0	0	0	0	0	0	0	0	0	0	0	0	0	0	0	0	0	0	0	0	0	0.00137243	0	0	0	0	0	0	0	0	0	0	0	0.00196984	0	0.000403656	0	0	0	0	0
ASV828	0	0	0	0	0	0	0	0	0	0	0	0	0	0	0	0	0	0	0	0	0	0	0	0	0	0	0	0	0	0	0	0	0	0	0	0	0	0	0	0	0	0	0	0	0	0	0	0	0
ASV829	0	0	0	0	0	0	0	0	0	0	0	0	0	0	0	0	0	0	0	0	0	0	0	0	0	0	0	0.00516679	0	0	0	0	0	4.84e-05	0	0	0	0	0	0	0	0	0	0	0	6.46e-05	0	0	0
ASV830	0	0	0	0	0.000193755	0	0	0.00046824	0	0	0	0	0	0	0	0	0	0	0	0.000952627	0.000613556	0	0	0	0	0	0	0	0	0	0	0	0.000339071	0.000290632	0	0.000419802	0	0	0	0.000371363	0	0	0.000209901	0.00072658	0	0	0	0	0
ASV831	0	0.000500533	0	0.000177608	0	0	0.000613556	0.00119482	3.23e-05	0	0.000661995	0	1.61e-05	0.000113024	0	0	0	0	0	0	0.000161462	0.000322924	4.84e-05	0	0	0	0	4.84e-05	0	0	0.000290632	4.84e-05	0	0.000193755	8.07e-05	0	0	0	3.23e-05	0	3.23e-05	0	0	0	0	0	0	0.000226047	0.000161462
ASV832	0	0	0	0	0	0	0	0	0	0	0	0	0	0	0	0	0	0	0	0	0	0	0.00547357	0	0.000339071	0	0	0	0	0	0	0	0	0	0	0	0	0	0	0	0	0	0	0	0	0	0	0	0
ASV833	0.000209901	0	0	0	0	0	0	0	0	0	0	0	0	0	0	0	0	0	0	0	0	0	0	0	0	0	0	0	0	0.000177608	0	0.000193755	0.000419802	0.000145316	0.00155004	0	0	0	0	0	0	0.000242193	0	0.000290632	0.000645849	0.000161462	0	0	0
ASV834	0	0	0	0	0	0	0	0.00132399	0.00482772	0	0	0	0	0	0	0	0	0	0	0	0	0	0	0	0	0	0	0	0	6.46e-05	0	0	0	0	0	0	0	0	0	0	0	0	0	0	0	0	0	0	0
ASV835	0	0	9.69e-05	0	0	0	0	3.23e-05	0	8.07e-05	0	0.000161462	0	0	0	0	6.46e-05	0	0	0	6.46e-05	0	0	0	0	0	0	0	0	4.84e-05	0.000209901	0.000322924	9.69e-05	6.46e-05	0	0.000161462	0.000209901	0.00012917	0.000113024	0	0.000161462	0.000226047	0.000532825	0.000710434	0.000145316	0.000145316	0.000209901	0	1.61e-05
ASV836	0	0	0	0	0	0	0	0	0	0	0	0	0	0	0.000274486	0	0.00046824	0	0	6.46e-05	0	0	0	0.000290632	0.00059741	0	0.000322924	0	0.000548971	0	0	0	0	0	0	0	0.000403656	0	0	0	0	0	0	0	0	0	0	0	0.000274486
ASV837	0	0	0	0	0	0	0	0	0	0	0	0	0	0	0	0	0	0	0	0	0	0	0	0	0	0	0	0	0	0.00184067	0	0	0	0	0	0.00327768	0	0	0	0	0	0	0	0	0	0	0	0	0
ASV838	0	0	0.000613556	0	0.00116253	0	0	0	0	0	0	0	0	0	0	0	0	0	0	0	0	0	0	0	0	0	0	0	0	0	0	0	0	0	0	0	0	0	0	0	0	0	0	0	0	0	0	0.000758872	0
ASV839	0.000290632	0.000339071	0.000306778	0.00109794	0	0	0.000145316	0	0	0.000581264	0	0	0	0	0.000387509	0	0	0	0	0	0	0	0	0	0	0	0.000242193	0	0	0	0	0.000274486	0	0.000274486	0	0	0	0	0	0	0.000161462	0.000177608	0	0	0	0	0.000532825	0	0
ASV840	0	0	0.00251881	0	0	0	0	0	0.00243808	0	0	0	0	0	0	0	0	0	0	0	0	0	0	0	0	0	0	0	0	0	0.000694287	0	0	0	0	0	0	0	0	0	0	0	0	0	0	0	0	0	0
ASV841	0	0	0	0	0.000113024	0.000387509	0.000161462	0.000193755	0	0.000339071	0.000177608	0.000145316	4.84e-05	0.000113024	4.84e-05	6.46e-05	0	0	0	0	0.000161462	0	0	0	0	0	0	0	0	0	0.000209901	0.000177608	0	0	0	0	1.61e-05	0.000226047	0	0	0	0	8.07e-05	4.84e-05	0.00101721	6.46e-05	0	0	9.69e-05
ASV842	0	0	0	0	0.00240579	0	0	0	0	0	0.00313237	0	0	0	0	0	0	0	0	0	0	0	0	0	0	0	0	0	0	0	0	0	0	0	0	0	0	0	0	0	0	0	0	0	0	0	0	0	0
ASV843	0	0	0	0	0	0	0	0	0	0	0	0	0	0	0	0	0	0	0	0	0	0	0	0	0	0	0	0	0	0	0	0	0	0	0	0	0	0	0	0	0	0	0.00046824	0.000306778	0.00316466	0	0.000661995	0	0
ASV844	0.00327768	0	0	0	0	0	0	0.00237349	0	0	0	0	0	0	0	0	0	0	0	0	0	0	0	0	0	0	0	0	0	0	0	0	0	0	0	0	0	0	0	0	0	0	0	0	0	0	0	0	0
ASV845	0	0	0	0	0	0	0	0	0	0	0	0	0	0	0	0	0	0	0	0	0	0	0	0	0	0	0.00497304	0	0	0	0	0	0	0	0	0	0	0	0	0	0	0	0	0	0	0	0	0	0
ASV846	0	0	0	0	0	0	0	0	0	0	0	0	0	0	0	0	0	0	0	0	0	0	0	0	0	0	0	0	0	0	0	0	0	0	0	0	0	0	0	0	0	0	0	0	0	0	0.000177608	0	0
ASV847	0	0	0	0	0	0	0	0	0	0	0	0	0	0	0	0	0	0	0	0	0	0	0	0	0	0	0	0	0	0	0	0	0	0	0	0	0	0	0.000193755	0	0	0	0	0	0	0	0	0.000113024	0
ASV848	0	0	0	0	0	0	0	0	0	0	0	0	0	0	0	0	0	0	0	0.000161462	0.000355217	0.00460167	0.000242193	0	0	0	0	0	0	0	0	0	0	0	6.46e-05	0	0	0	0	0	0	0	0	0	0	0	0	0	0
ASV849	0	0	0	0	0	0	0	0	0	0	0	0	0.000920335	0	0	0	0.00175994	0	0	0	0	8.07e-05	0	0	0.000968773	0	0	0	0.00201828	0	0	0	0	0	0	0	0	0	0	0	0	0	0	0	0	0	0	0	0
ASV850	0	0	0	0	0	0	0	0.00012917	0.000113024	0	0	9.69e-05	0	0	0	0	0	0	0	0	0	0	0	0	0	0	0	0	0	0	0	0	0	0	0	0	0	0	0	0	0	0	0	0	0	0	0	0	0
ASV851	0	0.000209901	0.000193755	0	3.23e-05	0.000290632	0	0.000226047	4.84e-05	0	0.000226047	0.000161462	0.000209901	9.69e-05	0	0	0.00012917	0	0	4.84e-05	0.000355217	0.000339071	0.000242193	0.000548971	0.000177608	0	0	0	0	0	3.23e-05	0	0	0	0	0.000322924	0	0	0.000322924	0	0.000306778	0	0.00012917	0	0.000113024	0.000177608	0	0	0
ASV852	0	0	0.00319695	0	0	0	0	0	0.00211516	0	0	0	0	0	0	0	0	0	0	0	0	0	0	0	0	0	0	0	0	0	0	0	0	0	0	0	0	0	0	0	0	0	0	0	0	0	0	0	0
ASV853	0	0	0	0	0	0	0	0	0	0	0	0	0	0	0	0	0	0	0	0	0	0	0	0	0	0	0	0	0	0	0	0	0	0.00529596	0	0	0	0	0	0	0	0	0	0	0	0	0	0	0
ASV854	0	0	0	0	0	0	0	0	0	0	0	0	0	0	0	0.000710434	0.00226047	0	0.000339071	0	0	0	0	0.000484387	0	0	0	0	0.00180838	0	0	0	0	0	0	0	0	0	0	0	0	0	0	0	0	0	0	0	0
ASV855	0	0.00135628	0	0	0	0.00169535	0	0	0	0	0	0.00251881	0	0	0	0	0	0	0	0	0	0	0	0	0	0	0	0	0	0	0	0	0	0	0	0	0	0	0	0	0	0	0	0	0	0	0	0	0
ASV856	0.000113024	3.23e-05	0	0	0	0.000322924	1.61e-05	0.000145316	6.46e-05	0.000145316	8.07e-05	0.000209901	0	9.69e-05	3.23e-05	0	0	0	6.46e-05	0	0	0.000113024	0	0.000145316	8.07e-05	0	0	0	0	0	3.23e-05	0.000242193	0	6.46e-05	3.23e-05	4.84e-05	0.000484387	0.000452094	0.000161462	0	0.000145316	0.000113024	3.23e-05	0.000193755	0.000500533	6.46e-05	0	0.000242193	9.69e-05
ASV857	0	0	0	0.000226047	0	0	0	4.84e-05	0	0	0	6.46e-05	0	0.000113024	0	0	0	0	0	0	0	0	0	8.07e-05	0	0	0	0.00177608	0.00242193	0	0	0.000193755	0	0.000242193	0	0.000371363	0	0	0	0	0	0	0	0	0	0	0	0	0
ASV858	0	0	0	0.000710434	0.000613556	0.000613556	0	0.000500533	0.000936481	0.000839603	0.000694287	0.000548971	0	0	0	0	0	0	0	0	0	0	0	0	0	0	0	0	0	0	0	0	0	0	0	0	0	0	0	0	0	0	0	0	0	0	0	0	0
ASV859	0	0	0	0.000419802	0	0	0	0	0	0.00248652	0	4.84e-05	0	0	0	0	0	0	0	0	0	0	0	0	0	0	0	0	0	0	0	0	0	0	0	0	6.46e-05	0	0.000226047	0	0.00046824	0	0	0	0	0	0.000516679	0.000113024	0.00059741
ASV860	0	0	0	0	0	0	0	0	0	0	0	0.00560274	0	0	0	0	0	0	0	0	0	0	0	0	0	0	0	0	0	0	0	0	0	0	0	0	0	0	0	0	0	0	0	0	0	0	0	0	0
ASV861	0.000339071	0	0	0	0	0	0	0	0	0.0010818	0	0	0	0	0	0	0	0	0.00046824	0	3.23e-05	0	0	0	0	0	0	0	0	0	6.46e-05	0	0	0.00187296	0	0	0	0	0	0	0	0	0	0.0012917	0	0	0	0	0
ASV862	0	9.69e-05	4.84e-05	0	0	0	0.000145316	0.000339071	0.000371363	0.000355217	0.000322924	0	0	0	0	0	0	0	8.07e-05	0	0	0	0	0	0	0	0	0	0	0	0	9.69e-05	0.00190525	9.69e-05	0	0	0	0	0	0	0	4.84e-05	0	6.46e-05	9.69e-05	0	0	0	8.07e-05
ASV863	0	0	0	0	0	0.000435948	0	0	0	0	0	0	0	0	0.000500533	0	0	0	0	0	0	0	0	0.000290632	0	0	0.000242193	0	0	0	0	0	0	0	0	0	0	0	0	0	0.00072658	0.000274486	0	0	0.000581264	0	0	0.000193755	0
ASV864	0	0	0	0	0	0	0	0	0	0	0	0	0	0	0	0.000791165	0	0	0	0	0.000419802	0	0	0	0	0	0	0	0	0	0	0	0	0	0	0	0	0.000371363	0	0	0.00113024	0	0	0	0	0	0	0	0
ASV865	0	0	0	0	0	0	0	0	0	0	0	0	0	0	0	0	0	0	0	0	0	0	0.00059741	6.46e-05	0.00187296	0	0	0	0	0	0	0	0	0	0	0	0.00114638	0	0	0	0	0	0	0	0	0.000193755	0	0	0
ASV866	0	0	0	0	0	0	0	0	8.07e-05	0.000177608	0	0	0.00163077	0	0	8.07e-05	4.84e-05	0	0.000209901	0	0	0	0	0	0	0	0	0	0	0	0	0	0	0.000419802	0	0	0	0	0	0	0	0	0	0	3.23e-05	0	0	0	0
ASV867	0	0	0	0	0	0	0	0	0	0.00025834	0	0	0	0	0.000581264	0	0.000629703	0	0	0	0	0	0	0	0	0	0.000355217	0.000807311	0.000387509	0.000581264	0	0	0	0	0	0.000403656	0	0	0	0	0	0.000791165	0	0	0	0	0	0.00046824	0
ASV868	0	0	0.000419802	0	0	0	0	0	0	0	0	0	0	0	0	0	0	0	0	0	0	0	0	0	0.00072658	0	0.000888042	0	0	6.46e-05	0.00185681	0	0.000532825	0	0	0	0	0	0	0	0	0	0.00025834	0	0	0	0	0	0
ASV869	0	0.000226047	0	0	0	0	0	0	0	0	0	0	0	3.23e-05	0.00025834	0	0.000193755	0	0	0	0.00106565	0.000920335	0.00012917	0	0	0	0	0	0	3.23e-05	0	0	0	0	0	0.000629703	0	0	0	0	0	0	0	8.07e-05	0	0	0.000306778	0	0.000145316
ASV870	0	0	0	0	0	0	0	0	0	0	0	0	0	0	0	0	0	0	0	0	0	0	0	0.00421416	0	0	0	0	0	0	0	0	0	0	0.000742726	0	0	0	0	0	3.23e-05	0	0	0	0	0	0	0	0
ASV871	0	0	0	0	0.00424646	0	0	0	0	0	0.0010818	0	0	0	0	0	0	0	0	0	0	0	0	0	0	0	0	0	0	0	0	0	0	0	0	0	0	0	0	0	0	0	0	0	0	0	0	0	0
ASV872	0	0.00237349	0	0	0	0	0.00119482	0	0	0	0	0.000274486	0	0	0	0	0	0	0	0	0	0	0	0	0	0	0	0.00114638	0	0	0	0	0	0	0	0	0	0	0	0	0	0	0	0	0	0	0	0	0
ASV873	0	0	0	0	0	0.000145316	0	0	0	0	0.000226047	0	0	0	0	0	0	0	0	0	0	0	0	0	0	0	0	0	0	0	0	0.00012917	0	0	0	0.000113024	0.000161462	0	0.00059741	0	0.000452094	0.000290632	0	0.000242193	0.000904188	0	0	0	0
ASV874	0	0	0	0	0	0	0	0	0	0	0	0	0.000161462	0	0	0	0	0	0	0	0	0	0	0	0.00132399	0	0	0	0	0	0.00261569	0	0	0.000226047	0	0.000516679	0	0	0	0	0	0	0.000290632	0	0	0	0	0	0
ASV875	0	0	0	0	0	0	0	0	0	0	0	0	0	0	0	0	0	0	0	0	0	0	0	0	0	0	0.00219589	0	0.000355217	0	0	0	0.00209901	0	0	0	0	0	0	0	0	0	0	0	0	0	0	0	0
ASV876	0	0	0.00187296	0.000226047	0	0	0	9.69e-05	0.00274486	0.000322924	0	0	0	0	0	0	0	0	0	0	0	0	0	0	0	0	0	0	0	0	0	0	0	0	0	0	0	0	0	0	0	0	0	0	0	0	0	0	0
ASV877	0	0	0	0	0	0	0	0	0	0	0	0	0	0	0.000387509	0	0	0.000113024	0	0	0	0.000242193	0	0	0	0.000532825	0	0	0	0	0	0.000613556	0	0	0	0	0.00012917	0	0	0	0	0	0	0	0	0.000419802	0	0	0.000339071
ASV878	0	0	0	0	0	0	0	0	0	0	0	0	0	0	0	0	0	0	0	0	0	0	0	0	0.000226047	0	0	0	0	0	0.00012917	0	0	0	0	0.000339071	0	0	0.000355217	0.000290632	0.000516679	0	0.000274486	0.000226047	0	0	0.00046824	0.000710434	0
ASV879	0	0.00174379	0	0	0	0	0	0	0.000888042	0	0	0	0	0	0	0	0	0	0	0	0	0	0	0	0	0	0	0	0	0	9.69e-05	0	0	0	0	0	0	0	0.000193755	0	0.00222818	0	0	0	0	6.46e-05	0	0	0
ASV880	0	0	0	0	0	0.000581264	0	0	0	0	0	0	0	0	0	0	0	0	0	0	0	0	0	0	0	0	0	0	0	0	0	0	0	0	0	0.000339071	0.000242193	0.000226047	0.000274486	0	0.000484387	0.000290632	0.00025834	0	0.000226047	0.000193755	0	0.00025834	0
ASV881	0	0	0	0	0	0.000226047	0	0	0	0	0	0.000193755	0	0	0	0.0025834	0	0	0	0	0	0.00158233	0	0	0	0	0	0	0	0	0	0	0	0	0	0.000226047	0	0	0	0	0	0	0	0	0	0	0	0	0
ASV882	0	0	0	0	0	0	0	0	0	0	0	0	0	0	0	0.000968773	0	0	0.000306778	0	0	0.000371363	0	0	0	0.000274486	0	0	0	0.000532825	0.000355217	0	0	0	0	0	0	0	0	0	0	0	0.000694287	0	0	0	0	0.000742726	0
ASV883	6.46e-05	8.07e-05	0	0.000145316	0	0	0.000113024	0	0.000290632	0.000145316	0.000113024	0	4.84e-05	4.84e-05	0.00012917	0.000177608	0	0.00059741	0	0	0	0.000113024	0	0.00137243	0	6.46e-05	0	0	0	0	0	0	0	0	0	0	0.000161462	0	0	0.000193755	0	0	0	8.07e-05	0	0	0	0.00025834	0.000387509
ASV884	0	0.000113024	0	0	0.000177608	0.000177608	0	0	0	0.000387509	0.000193755	0	0	3.23e-05	0	0	0	0	0	0.000113024	0	0	0	0	4.84e-05	0	0	0	0	0	0	0	9.69e-05	9.69e-05	0	0.00025834	0.000516679	0	0.000226047	0	0	0	0.000355217	0.000339071	0.000419802	0	0	0	0.000371363
ASV885	0	0	0	0	0	0	0	0	0.000209901	0	0	0	0	0	0	0	0	0	0	0	0	0	0	0	0	0	0	0	0	0	0	0	0	0	0	0	0	0	0	0.00167921	0	0	0	0	0	0.00311622	0	0	0
ASV886	0	0	0	0	0	0	0	0	0	0	0	0	0	0	0	0	0	0	0	0	0	0	0	0	0	0	0	0	0	0	0	0	0	0	0	0	0	0	0	0	0	0	0	0	0	0	0	0	0
ASV887	0	0	0	0.000322924	0	0	0	0	0	0	0	0	0	0	0	0	0	0	0	0	0.000145316	6.46e-05	0	0	0	0	0	0	0	0	0	0	0	0.000177608	0	0	0.000742726	0	0.00046824	0	0.00072658	0	0	0	0.000791165	0	0	0	0
ASV888	0.000371363	0	0	0.000968773	0	0	0	0	0	0.000823457	0	0	0	0	0	0.000548971	0.00132399	0	0	0	0	0	0	0	0	0	0	0	0.0010495	0	0	0	0	0	0	0	0	0	0	0	0	0	0	0	0	0	0	0	0
ASV889	0	0	0	0	0	0	0	0	0	0	0	0.000565118	0	0	0	0	0	0.000113024	0	0	0	0	0	0	0	0	0	0	0	0	0	0.000645849	0.000322924	0	0	0	0	0	0	0	0	0	0.00135628	0	0.000565118	0.000532825	0	0	0
ASV890	0	0	0	0	0	0.00148545	0	0	0	0	0	0.00385895	0	0	0	0	0	0	0	0	0	0	0	0	0	0	0	0	0	0	0	0	0	0	0	0	0	0	0	0	0	0	0	0	0	0	0	0	0
ASV891	0	0	0	0	0	0	0	0	0	0	0	0	0.000387509	0	0	0.00012917	0.00025834	0	0.000678141	0.00012917	0.00180838	0.000306778	0	0.000435948	0.000645849	0	0	0	0	0	0	0	0	0	0	0	0	0	0	0	0	0	0	0	0	0	0	0	0
ASV892	0	0	0	0	0	0	0	0	0	0	0	0	0	0	0	0	0	0	0	0	0	0	0	0	0	0	0	0	0	0	9.69e-05	0	0	0	0	0	0	0	0	0	0	0	0	0	0	0	0	0	0.00353602
ASV893	0	0	0	0	0	0	0	0	0	0	0	0	0	0	0	0	0	0	0	0	0	0	0	0	0	0	0	0	0	0	0	0	0	0	0	9.69e-05	0	0	0	0	0	4.84e-05	0	0	0	0	0	0.000193755	0
ASV894	0	0	0	0	0	0	0	0	0	0	0	0	0.00214745	0	0	0	0	0	0	0	0	0.000710434	0	0	0.0017115	0.000226047	0	0	0	0	0	0	0	0	0	0	0	0	0	0	0	0	0	0	0	0	0	0	0
ASV895	0	0	0	4.84e-05	0.000161462	0	0	0.000145316	0.000177608	8.07e-05	0.00208286	9.69e-05	0	0	0	0	0	0	0.00012917	0.000871896	0	0	0.00012917	0	0	4.84e-05	0	0	0	0	0.000161462	0	0	0	0	0.00025834	0	1.61e-05	0.000113024	0	0	0	6.46e-05	0	0	0	0	0	0
ASV896	0	0	0	0	0	0	0	0	0	0.000339071	0.000516679	0.000355217	0	0.000209901	0.000290632	0	0.000193755	0.000565118	0	0	0	0.000177608	0.000226047	0.000339071	0	0	0	0	0	0	0	0	0.00025834	0	0	0	0	0	0	0	0	0	0	0	0.000209901	0.000742726	0	0	0
ASV897	0	9.69e-05	0	0	0	0	0	0	0	0.000242193	0	0	0	0	0	8.07e-05	0	0	0.00330998	0.000532825	0	0.000145316	0	0	0	0	0	0	0	0	0	0	0	0	0	0	0	0	0	0	0	0	0	0	0	0	0	0	0
ASV898	0	0	0	0	0	0	0	0	0	0	0	0	0	0	0	0	0	0	0	0	0	0	0	0	0	0	0	0	0	0	0	0	0	0	0	0	0	0	0.00453709	0	0	0	0	0	0	0	0	0	0
ASV899	0.000452094	0	0	0	0.000145316	0.000355217	0	0	0	0	0	0	0	0	0	0	0	0.000387509	0	0	0	0	0	0	0	0	0	0	0	0.000161462	0.000355217	9.69e-05	0	0.000387509	0	0	0	0	0	0	0	0.000355217	0.00153389	0.000177608	0	0	0	0	0
ASV900	0	0	0.000306778	0	0	9.69e-05	0	0.00117867	0	0.00046824	0	0	0	0.00209901	0	0	0	0	0	0.000742726	0	0	0	0	0	0	0	0	0	0	0	0	0	0	0	0	0	0	0	0	0	0	0	0	0	0	0	0	0
ASV901	0	0	0	0	0	0	0	0	0	0	0	0	0	0	0	0	0	0	0	0	0	0	0.00502147	0	0	0	0	0	0	0	0	0	0	0	0	0	0	0	0	0	0	0	0	0	0	0	0	0	0
ASV902	0	0	0	0	0	0	0	0	0	0	0	0	0	0	0	0	0	0	0	0	0	0	0	0	0	0	0	0	0	0	0	0	0	0	0	0	0	0	0	0	0	0	0	0	0	0	0	0	0
ASV903	0	0	0	0	0	0	0	0	0	0	0	0	0	0	0	0	0	0	0	0	0	0	0	0	0	0	0	0	0	0.000952627	0	0	0	0	0	0	0	0	0	0	0	0.00190525	0	0	0	0	0	0	0
ASV904	0	0	0	0	0	0	0	0	0	0	0	0	0	0	0	0	0	0	0	0	0	0	0	0	0	0	0	0	0	0	0	0	0	0	0	0	0.000920335	0.00113024	0.000871896	0.000645849	0.000355217	0	0	0.000339071	0	0	0.000387509	0	0
ASV905	0	0	0	0	0	0	0	0	0	0	9.69e-05	0	0.000823457	0	0	3.23e-05	0	0	0	0	0	0	0	0.000242193	0.000839603	0	0	0	0	0.00179223	4.84e-05	0	0	8.07e-05	0	0	0	0	0	0	0	0.000113024	0	0	0	0	0	0	0
ASV906	0	4.84e-05	0	0.00242193	0	0	0.000371363	0	0	0.00132399	0	0	0	0	0	0	0	0	0	0	0	0	0	0	0	0	0	0	0	0	0	0	0	0	0	0	0	0	0	0.000145316	0.000274486	0	0	0	0	0	0	0	0
ASV907	0	0	0	0	0	0.0027933	0	0	0	0	0	0.00237349	0	0	0	0	0	0	0	0	0	0	0	0	0	0	0	0	0	0	0	0	0	0	0	0	0	0	0	0	0	0	0	0	0	0	0	0	0
ASV908	0	0	0	0	0	0	0	0	0	0	0	0	0	0	0	0	0	0	0	0	0	0	0.0049246	0	0	0	0	0	0	0	0	0	0	0	0	0	0	0	0	0	0	0	0	0	0	0	0	0	0
ASV909	0.00310007	0	0	0	0	0	0	0.00146931	0	0	0.000306778	0	0	0	0	0	0	0	0	0	0	0	0	0	0	0	0	0	0	0	0	0	0	0	0	0	0	0	0	0	0	0	0	0	0	0	0	0	0
ASV910	0	0.000322924	1.61e-05	0	0	6.46e-05	6.46e-05	6.46e-05	0	0.000322924	0.000145316	0.000532825	0.000113024	0	0.000161462	0.000145316	0	0	4.84e-05	0	8.07e-05	0.000113024	0	0	1.61e-05	0	6.46e-05	0	0	3.23e-05	0	3.23e-05	0.000306778	0	0	0	0	0	6.46e-05	0	0	0.000113024	0	0	0	0	3.23e-05	0	0.00025834
ASV911	0	0	0.00364905	0	0	0	0	0	0.00085575	0	0	0	0	0	0	0	0	0	0	0	0	0	0	0	0	0	0	0	0	0	0	0	0	0	0	0	0	0	0	0	0	0	0	0	0	0	0	0	0
ASV912	0	0	0	0	0.00248652	0	0	0	0	0	0.00100107	0	0	0	0	0	0	0	0	0	0	0	0	0	0	0	0	0	0	0	0	0	0	0	0	0	0	0	0	0	0	0	0	0	0	0	0	0	0.00111409
ASV913	1.61e-05	0	0	0	0	0	0	0	0.000161462	0	0	0.000807311	0	0	0	0	0	0	0	0	0	0	0	0.000532825	0	0	0	0	0	6.46e-05	0	0	0.00311622	0	0	0	0	0	0	0	0	0	0	0	3.23e-05	0	0	0	0
ASV914	0	0	0	0	0	0	0	0	0	0	0	0	0	0	0	0	0	0	0	0	0	0	0	0	0	0	0	0	0	0	0	0	0	0	0	0	0.000113024	0.00025834	0	0.000403656	0.00142087	0	0	0.00059741	0	0	0.000355217	0	0
ASV915	0	0.000435948	0	0	0	0	0	0.00116253	0	0	0	0	0	0	3.23e-05	0	0	0	0	0	0	0	3.23e-05	0	0	0	0	0	0	0	0	0	0	0	0	0	0.000226047	0.00172765	0.00012917	0	0	0	0	0	1.61e-05	0	0	0	0
ASV916	0	0.000177608	0	0.00142087	0.000113024	0.000565118	0.000306778	0	0	0.000226047	0.000823457	0.000193755	0	0	0	0	0	0	0	0	0	0	0	0	0.000145316	0	0	0	0	0	0	0	0	0.00059741	0	0	0	0	0	0	0	0	0	0	0	0	0	0	0
ASV917	0	0	0	0	0.00103336	0	0	0.000209901	0	0	0.000371363	0.000355217	0	0.000274486	0	0.000209901	0	0	3.23e-05	0.000161462	0	0	0	3.23e-05	0	0	8.07e-05	0	0	0	0	0	0	0	0	0	0	0	0	0.000242193	0.000161462	0	0	0.000290632	0	0.000242193	0.000226047	0	0.000145316
ASV918	0	0.000500533	0.000758872	0	0	0.00226047	9.69e-05	0	0.000452094	0	0	0.000403656	0	0	0	0	0	0	9.69e-05	0	0	0	0	0	0	0	0	0	0	0	0	0	0	0	0	0	0	0	0.00012917	0	0	0	0	0	8.07e-05	0	0	0	0
ASV919	0	0	0	0	0	0	0	0	0	0	0	0	0	0	0	0	0	0	0	0	0	0	0.00477928	0	0	0	0	0	0	0	0	0	0	0	0	0	0	0	0	0	0	0	0	0	0	0	0	0	0
ASV920	0	0	0	0	0	0	0	0	0	0	0	0	0	0	0	0	0	0	0	0	0	0	0	0.00169535	0	0	0	0	0	0.000629703	0	0	0	0	0	0	0	0	0	0	0	0.00121097	0	0	0	0	0	0	0
ASV921	0	0	0	0	0	0	0	0	0	0	0	0	8.07e-05	0.000177608	0	0	0	0	3.23e-05	0.000581264	0	0.000242193	0.00012917	6.46e-05	0	0	0	0	0	8.07e-05	8.07e-05	0.000242193	0	0	0	0.00059741	0	0	0	0	0.000161462	0.000226047	4.84e-05	0	0	0	0.000403656	0	0.000775019
ASV922	0	0	0	0	0	0	0.00012917	0	0	0.000274486	0	0	0	0	0	0	0	0	0.00012917	0	0.000209901	0	0	0	0	0	0	0	0.000209901	0	8.07e-05	0.000209901	0	0.000516679	0	0	0	0	0	0.00012917	0.00012917	0	0.00012917	8.07e-05	0.000177608	4.84e-05	0	0	0.000355217
ASV923	0.000387509	0	0.000193755	0.000339071	0	0	0	0	0.00025834	0.000387509	0	0	0.000355217	0.000516679	0.000484387	0	0	0.00046824	0	0	0	0	0	0	0.00025834	0.000242193	0.000274486	0	0.000193755	0	0	0	0	0	0.000161462	0	0	0	0	0	0	0	0	0	0	0	0	0	0
ASV924	0	0	0	0	0	0	0	0.0046824	0	0	0	0	0	0	0	0	0	0	0	0	0	0	0	0	0	0	0	0	0	0	0	0	0	0	0	0	0	0	0	0	0	0	0	0	0	0	0	0	0
ASV925	0.000581264	0	0.000403656	0.000775019	0	0	0.00025834	0	0	0	0	0	0.000226047	0	0	0	0	0.00103336	0.00046824	0.000193755	0	0	0	0	0.000500533	0	0	0	0	0	0	0	0	0	0	0	0	0	0	0	0	0	0	0	0	0	0	0	0
ASV926	0	0	0	0	0.00124326	0.000339071	0	0	9.69e-05	0	0.000952627	0	0	0	0	0	0	0	0	0	0	0	0	0	0	0	0	0	0	0	0	0	0	0	0	0	0	4.84e-05	0	0	0	0	0	0	0	6.46e-05	0	0	0
ASV927	0	0	0.000645849	0	0	0	0	0	0	0	0	0	0	0	0	0	0	0	0	0	0	0	0	0	0	0	0	0	0	0	0	0.000177608	0	0	0	0.00025834	0	0	0	0	0.000387509	0.000452094	0	0.000242193	0	0	0.000306778	0.000516679	0
ASV928	0	0.000322924	0	0.000339071	0.00193755	0.00114638	0	0	0	0.000742726	8.07e-05	9.69e-05	0	0	0	0	0	0	0	0	0	0	0	0	0	0	0	0	0	0	0	0	0	0	0	0	0	0	0	0	0	0	0	0	0	0	0	0	0
ASV929	0	0	0	0.00227662	0.00116253	0	0	0	0	0	0	0	0	0	0	0	0	0	0	0	0	0	0	0	0	0	0	0	0	0	0	0	0	0	0	0	0	0	0	0	0	0	0	0	0	0	0.000775019	0	0
ASV930	8.07e-05	0	0.00012917	0	0.000339071	0.000419802	4.84e-05	0.000193755	0.00012917	0.000145316	0.000629703	0	0	0.000242193	0.000290632	0	0	0	0	0	0.00046824	9.69e-05	6.46e-05	0	0	0	0	0	0	0	0	0	0	8.07e-05	0	0.000242193	0	3.23e-05	0.000161462	3.23e-05	0.000177608	0	0	0	0	0	0	8.07e-05	0.000306778
ASV931	0	0	0	0	0.000936481	0	0	6.46e-05	1.61e-05	0	0.00272871	0	0	0	0	0	0	0	0	0	0	0	0.000145316	0	4.84e-05	0	0	0	0	0	0	0	0	0	0	0	0	0	0.000193755	0	0	0	0	0	0.000145316	0	0	0	0
ASV932	0	0	0	0	0	0	0	0	0	0	0	0	0	0	0	0	0	0	0	0.00219589	0	0	0	0	0	4.84e-05	0	0	0	0	0	0	9.69e-05	0.000306778	0	0	0	0	0	0	0	0	0	0	0	0	0	0	0.00151775
ASV933	0.000113024	0	0	0	0	0	0	0	0.00046824	0	3.23e-05	6.46e-05	0	0	0	0	0	0	0	0	0	0	0	0	0	0	0	0	0	0	0	0	0	0	0	0.00012917	0	8.07e-05	0	0	0.000193755	6.46e-05	0	0	0	0	0	0.00227662	0.000371363
ASV934	0.000193755	0	0.000113024	0	0	0	0	0	0.000290632	0	0	0	0	0	0	0	0	0	0	0	0	0.000209901	0	0.00012917	8.07e-05	0.000177608	4.84e-05	0.000209901	0	0	0.00025834	0.000161462	0	0.000242193	0	0	0.000209901	0	0.000242193	0	0	0	0.000274486	0	0.00025834	0.000290632	0	0	0.000226047
ASV935	0	0	0	0	9.69e-05	0.000209901	0	0	0	0	0.00245422	0	0	0	0	0.000403656	0	0	0	0	0.000274486	0	0	0.000274486	0	0	0	0	0	0	0	0	0	0	0	0.000113024	0	0	0	0	0	0	0	0	0	0	0	0	0.000177608
ASV936	4.84e-05	0	0.000209901	0	0	0	0	0	0	0	0.00109794	0	0	0.000274486	0	0	0	0	0	0.000161462	0	0	0	0	0	0.000161462	0	0	0	0	0.000581264	0	0	0	0	0	0	0.000710434	0.000484387	0	0	0	0	0.000306778	0.000177608	0	0	0	0
ASV937	0	0	0	0	0	0	0	0	0	0	0	0	0.000548971	0	0.000516679	0	0	0.00116253	0	0	0	0	0	0	0	0	0	0	0	0	0.000387509	0	0	0	0	0.000548971	0	0	0	0	0	0	0	0	0	0	0	0.000403656	0
ASV938	0	0	0	0	0	0	0	0	0	0	0	0	0	0	0.0010818	0	0	0	0	0	0	0	0	0	0	0	0	0	0	0	0	0	0	0	0	0	0	0	0	0	0	0.000968773	0.00245422	0	0	0	0	0	0
ASV939	0	0	0	0	0	0	0	0	0	0	0	0	0	0	0	0	0	0	0	0	0	0	0	0	0	0	0	0	0	0	0	0	0	0	0	0	0	0	0	8.07e-05	0	0.00450479	0	0	0	0	3.23e-05	0	0
ASV940	0	0	0	0	0.00385895	0	0	0	0	0	0.000758872	0	0	0	0	0	0	0	0	0	0	0	0	0	0	0	0	0	0	0	0	0	0	0	0	0	0	0	0	0	0	0	0	0	0	0	0	0	0
ASV941	0	0	0	0	0	0	0	0.000823457	0	0	0	0	0	0	0	0	0	0	0	0	0	0	0	0	0	0.00310007	0	0	0	0	0	0	0	0	0	0	0	0	0	0	0	0	0	0	0	0	0	0	0
ASV942	0	0.0010495	0	0	0	0	0	0	0	0	0.00117867	0	0	0	0	0	0	0.00143701	0	0	0	0	0	0	0	0	0	0.000678141	0	0	0	0	0	0	0	0	0	0	0	0	0	0	0	0	0	0	0	0	0
ASV943	0	0	0	0	0	0	0	0	0	0	0	0	0	0	0	0	0	0	0	0	0	0	0	0	0	0	0	0	0	0	0	0	0	0	0	0	0	0	0	0	0	0	0	0	0	0	0	0.0044725	0
ASV944	0	0	0.000145316	0.000435948	0	0	0	0	0	0	0.000322924	0	0	0	0	0	0	0	0.000193755	0	0	0	0	0.000290632	9.69e-05	0	0	0	0	0	0	0.000645849	0	0.000290632	0	0	0.000548971	0	0.00012917	0	0	0	0	0.000952627	0	0	0	0	0
ASV945	0	0	0	0	0	0	0	0	0	0	0	0	0	0	0	0	0	0	0	0	0	0	0	0	0	0	0	0	0	0	0	0.00248652	0	0	0	0	0	0	0	0	0	0	0	0	0.000823457	0	0	0.00100107	0
ASV946	0	0	0	0	0	0	0	0	0	0	0	0	0.000322924	0	0.000403656	0.000710434	0.000565118	0	0	0	0.000371363	0.000742726	0.000419802	0	0	0	0	0	0.000355217	0	0	0	0	0	0	0	0	0	0	0	0	0	0	0	0	0	0.000226047	0	0
ASV947	0	0	0	0	0	0	0	0	0	0	0	0	0	0	0	0	0	0	0	0	0	0	0	0	0	0	0	0	0	0	0	0	0	0	0	0	0	0	0	0	0	0	0	0	0	0	0	0	0
ASV948	0	0	0	0	0	0	0	0	0	0	0.000435948	0	0	0	0	0.00306778	0.000226047	0	0	0	0	0	0	0	0	0	0	0	0	0	0	0	0	0	0	0	0	0	0	0	0	0	0	0	0	0	0	0.000290632	0
ASV949	0	0.000888042	0	0.000145316	0	0	0	9.69e-05	0.000419802	0	0	0	0	0.000242193	0.00085575	0	0	0	0	0	8.07e-05	0.00012917	0.00012917	0	0	0.000193755	0	0	0	0	0	0	0	0	0	0.000209901	0	0	0	0	0	0.000161462	0	0.000161462	0	0	0	0.000177608	0
ASV950	0	0.000355217	0	0	0	0.000387509	0.000548971	0	0	0.000532825	0	0	0	0	0	0	0	0.000177608	0	0.000387509	0	0	6.46e-05	9.69e-05	0	0	0	0	0	0	0	0	0	0.000500533	0	0	0	0	0.000645849	0.000209901	0	0	0	0	0	4.84e-05	0	0	0
ASV951	0	0	0	0	0.000435948	0	0	0	0	0	0.000419802	0	0	0	0	0.000484387	0	0.000403656	0	0	0	0	0	0	0	0	0	0	0	0	0	0	0	0	0	0.000274486	0	0	0	0	0.00109794	0	0	0	0	0	0	0.000452094	0
ASV952	0	0	0	0	0.000355217	0	0	0	0	0	0	0	0.000823457	0	0	0	0	0	0	0	0.000226047	0	0	0	0	0	0	0	0	0	0	0	0	0	0	0	0	0	0	0	0	0	0	0.00113024	0	0	0	0	0
ASV953	0	0	0	0	0	0	0	0	0	0	0	0	0	0	0	0	0.00111409	0	0	0	0	0	0.00337456	0	0	0	0	0	0	0	0	0	0	0	0	0	0	0	0	0	0	0	0	0	0	0	0	0	0
ASV954	0	0	0	0	0	0	0	0	0	0	0	0	0	0	0	0	0.00284174	0	0	0	0	0	0	0	0	0	0	0	0.00190525	0	0	0	0	0	0	0	0	0	0	0	0	0	0	0	0	0	0	0	0
ASV955	0.000290632	0.000113024	0.000177608	0.000274486	9.69e-05	3.23e-05	0	0.000371363	0.000177608	0.000274486	0	0.000193755	0	0.00012917	0	0	0	0	0.000226047	0.000581264	0	0	0	0	0.000290632	0	0	9.69e-05	0	0.000177608	0	0	0	0	0.000113024	0	0	0.000161462	8.07e-05	0	0	0	0	0	0	0	0	0	0.000113024
ASV956	0	0	0	0.000145316	0.000193755	0.000274486	0	0	0	0	0	0.000177608	0.000742726	0	0	0	0.00177608	0.000403656	6.46e-05	0	0	0	0.00025834	0	0.000177608	0	0	0	0	0.000209901	0	0	0	0	0	0	0	0	0	0	0	0	0	0	0	0	0	0	0
ASV957	0	0	0	0	0	0	0	0	0	0	0	0	0	0	0	0	0	0	0	0	0.000387509	0	0	0	0	0	0	0	0	0	0	0	0	0.00347144	0	0	0	0.000419802	0	0	0	0	0	0	0	0	0	0	0
ASV958	0	0	0	0	0	0	0	0	0	0	0	0	0	0	0	0	0	0	0	0	0	0	0	0	0	0	0	0	0	0	0	0	0	0.000209901	0	0.000306778	0	0	0	0	0.000710434	0	0	0	0	0	0	0.000516679	0
ASV959	0	0	0	0	0	0	0	0	0	0	0	0	0	0	0	0	0	0	0	0	0.00177608	0	0	0	0	0	0	0	0	0	0.000839603	0	0	0.000775019	0	0	0	0	0	0	0	0	0	0	0	0	0	0	0
ASV960	0	0	0	0	0	0	0	0	0	0	0	0	0	0	0	0	0	0	0	0	0	0	0	0	0	0	0	0	0	0.00345529	0	4.84e-05	1.61e-05	9.69e-05	0	0	0	0	0	0	0	8.07e-05	0	0	0	0	0	0	0
ASV961	0	6.46e-05	0	4.84e-05	0	0	8.07e-05	0	0.00340685	0.000113024	0	0	0	0	0	9.69e-05	0.00025834	0	0	0	0	0.00012917	0	0	6.46e-05	0	0	0	0	0	0	0	0	0	0	0	0	0	9.69e-05	0	0	9.69e-05	6.46e-05	0	0	0	0	0.00012917	0
ASV962	0	0	0	0	0	0.000113024	0	0.000145316	0	0	0	0	0.000113024	0	0.000742726	0	0.000177608	4.84e-05	0	0	0.00012917	0.000145316	0	0.000177608	0	0	0	0	0	0.000145316	0.000145316	0	0	0	0	0	0.000209901	0	0.000371363	0.000306778	0	0	0	0	0	0	0.000145316	0.00025834	0
ASV963	0	0	0	0	0	0	0	0	0	0	0	0	0	0	0	0	0	0	0	0	0	0	0	0	0	0	0	0	0	0	0	0	0	0	0	0	0	0	0.0015016	0	0	0	0	0	0	0	0.00237349	0	0
ASV964	0	0	0	0	0	0	0	0	0	0	0	0	0	0	0	0	0	0	0	0	0	0	0	0	0	0	0	0	0	0	0	0	0	0	0	0	0	0	0	0.00374592	0	0	0	0	0	0.000452094	0	0	0
ASV965	0	0	0	0	8.07e-05	0	0	8.07e-05	0	6.46e-05	0.00385895	0	0	0	0	0	0	0	0	0	0	0	0	0	0	0	0	0	0	0	0	0	0	0	0	0	0	0	0	0	0	0	0	0	0	0	0	0	0
ASV966	0	0	0	0	0	0	0	0	0	0	0	0	0	0	0	0	0	0	0	0	0	0	0	0	0	0	0	0	0	0	0	0	0	0	0	0	0	0	0	0	0.00360061	0	0	0	0	9.69e-05	0.000565118	0	0
ASV967	0	0	0	0	0	0	0	0	0	0	0	0	0	0	0	0	0	0	0	0	0	0	0	0	0	0	0	0	0	0	0	0	0	0	0	0	0	0	0	0	0	0	0	0	0	0	0	0	0
ASV968	0	0	0	0	0	0	0	0	0	0	0	0	0	0	0	0	0	0	0	0	0	0	0	0	0	0	0	0	0	0	0	0	0	0	0	0	0	0	0	0	0	0	0	0	0	0	0	0	0
ASV969	0	0	0	0	0	0	0	0	0	0	0	0	0	0	0	0	0	0	0	0	0	0	0	0	0	0	0	0	0	0	0	0	0	0	0	0	0	0	0	0	0	0	0	0	0	0	0	0	0
ASV970	0	0	0	0	0	0	0	0	0	0	0	0	0	0	0	0	0	0	0	0	0	0	0	0	0.000177608	0.00046824	0.000161462	0	0.00121097	0	0	0.00169535	0	0.000209901	0.000193755	0	0	0	0	0	0	0	0	0.000161462	0	0	0	0	0
ASV971	0	0	0	0	0	0	0	0	0.000177608	0.000484387	0.000339071	0.000807311	0	4.84e-05	0	0	0	0	0	0	0	0	0	0	0	0	0	0	0	0	0	0	0.000177608	0	0	0.000387509	0	0	0	0	0	0	0	0	0	0	0.00059741	0	0
ASV972	0	0	0	0	0	0	0	0	0	0	0	0	0	0	0	0	0	0	0	0	0	4.84e-05	0	0	0	0	0	0	0	0	0	0	0.000193755	0	0	0	0.000177608	0.00012917	0	9.69e-05	0	0.000226047	0.00025834	0.000306778	0.000839603	0.000226047	0	0.000209901	0
ASV973	0	0	0.00263183	0	0	0	0	0	0.00145316	0	0	0	0	0	0	0	0	0	0	0	0	0	0	0	0	0	0	0	0	0	0	0	0	0	0	0	0	0	0	0	0	0	0	0	0	0	0	0	0
ASV974	0	0	0	0	0.00169535	0	0	0	0	0	0.00248652	0	0	0	0	0	0	0	0	0	0	0	0	0	0	0	0	0	0	0	0	0	0	0	0	0	0	0	0	0	0	0	0	0	0	0	0	0	0
ASV975	0	0	0	0	0	0	0	0	0	0	0	0	0	0	0	0	0	0	0	0	0	0	0	0	0	0	0	0	0	0	0	0	0	0	0	0	0	0	0	0	0	0	0	0.000548971	0.000629703	0.000548971	0	0	0
ASV976	0	0	0	0	0	0	0	0	0	0	0	0	0.000904188	0	0	0.000871896	0.000758872	0	0	0.000775019	0	0.000710434	0	0	0	0	0	0	0	0	0	0	0	0	0	0	0	0	0	0	0	0	0	0	0	0	0	0	0
ASV977	0	0	0	0	0	0	0	0	0	0	0	0	0	0	0	0	0	0	0	0	0	0	0	0	0	0	0	0	0	0.00366519	0	0	0	0	0	0	0	0	0	0	0	0	0	0	0	0	0	0	0
ASV978	0	0	0	0	0	0	0	0	0	0	0	0	0	0	0	0	0	0	0	0	0.000371363	0	0	0	0	0	0	0	0	0	0	0	0	0	0	0	0	0.000581264	0	0	0.000193755	0	0	0	0	0	0	0.000452094	0
ASV979	0	0	0	0	0	0	0	0	0	0	0	0	0	0	0	0	0	0	0	0	0	0	0	0	0	0	0	0	0	0.000952627	0	0	8.07e-05	0	0.00012917	0	0	0	0	0	0	0.0012917	0	0	0	0	0	0	0
ASV980	0.000145316	0	0	0	0	0	0	0	0	0	0	0	0	0.000242193	0	0	0	0	0	0	0	0	0	0	0	0	0	0	0	0	0	0	0	0	0	0	0	0	0	0	0.000419802	0	0	0	0.000113024	0	0	0	0
ASV981	0.000532825	0	0	0	0	0	0	0	0	0	0	0	0	0	0	0	0	0	0	0	0	0	0	0	0	0	0	0	0	0	0	0	0	0	0	0	0	0	0	0.000742726	0	0	0	0	0	0	0	0.000339071	0
ASV982	0	0	0	0	0	0	0	0	0	0	0	0	0	0	0	0	0	0	0	0	0	0	0	0	0	0	0	0	0	0	0	0	0	0	0	0	0	0.000387509	9.69e-05	0.00268027	0	0.000161462	3.23e-05	0	0	0.000209901	0	0	0
ASV983	0	0	0	0	0.000226047	0.00127555	0	9.69e-05	3.23e-05	0.000209901	0.000226047	0.00214745	0	0	0	0	0	0	0	0	0	0	0	0	1.61e-05	0	0	0	0	0	0	6.46e-05	0	0	0.000177608	0	0	0	0	0	0	0	0	0	0	0	0	0	0
ASV984	0	0	0	0	0	0	0	0	0	0	0	0	0	0	0	0.000209901	0	0	0	0	0	0	0	0	0	0	0	0	0	0	0	0	0	0	0	0	0	0.000113024	0	0	0	0	0	0	0	0	0	0	0
ASV985	0	0	0	0	0	0	0	0	0	0	0	0	0.000435948	0	0	0	0	0	0.00025834	0	0	0	0	0	0	0	0	0.00253496	0	0	0	0	0	0.000710434	0	0	0	0	0	0	0	0	0	0	0	0	0	0	0
ASV986	0	0	0	0	0	0	0	0	0	0	0	0	0	0	0	0	0	0	0	0	0	9.69e-05	0	0.000984919	0	0.000435948	0	0	0	0	0	0.00114638	0	0	0	0	0	0.000113024	0	0	0	0	0	0	0	0	0	0	0
ASV987	0	0	0	0	0	0	0	0	0	0	0	0	0	0	0	0	0	0	0	0	0	0	0	0	0	0	0	0	0	0	0	0	0	0.00164691	0	0	0	0	0	0	0	0	0.00205057	0	0	0.000242193	0	0	0
ASV988	0	0	0	0	0	0	0	0	0	0	0.000904188	0.000387509	0	0	0	0	0	0.00137243	0	0	0	0	0.000419802	0	0	0	0	0	0.00114638	0	0	0	0	0	3.23e-05	0	0	0	0	0	0	0	0	0	0	0	0	0	0
ASV989	0	0	0	0	0	0	0	0	0	0	0	0	3.23e-05	0	0.00046824	0	0	0	0	0	0	0	0	4.84e-05	0	0	0.000775019	0	0.00012917	0	0.00224433	0	0.000355217	0	0	0	0	0	0	0	0	0	0	0	0	0	0	0	0
ASV990	0	0	0	0	0	0	0	0	0	0	0	0	0	0	0	0	8.07e-05	0	0	0	0.00132399	0.000403656	0.00235735	0	0	0	0	0	0	0	0	0	0	0	0	0	0	0	0	0	0	0	0	0	0	0	0	0	0
ASV991	0	0	0	0	0	6.46e-05	0.000500533	0	0	0	3.23e-05	0	0.000242193	0	0.000226047	0.000161462	0.000452094	0.000145316	0.00135628	0.000209901	0.00012917	0	9.69e-05	0	0	0	0	0	0	0	0	0	0	0	0	0	0	0	0	0	0	0	0	0	0	0	8.07e-05	4.84e-05	0
ASV992	0	0	0	0	0.000322924	0.00219589	0	0	0	0	0	0.000742726	0	0	0	0	0	0	0	0	0	0	0	0	0	0	0	0	0	0	0.000936481	0	0	0	0	0	0	0	0	0	0	0	0.000145316	0	0	0	0	0	0
ASV993	0	0	0	0	0	0	0	0	0	0	0	0	0	0	0	0	0	0	0	0	0	0	0	0	0	0	0	0	0	0	0	0	0	0	0	0	0.000613556	0.000145316	0	0	0.000145316	0	0	4.84e-05	3.23e-05	0	0	0	0.000242193
ASV994	0	0	0	0	9.69e-05	0	0	0	0.000161462	0	0	0	6.46e-05	0	9.69e-05	0	0.00012917	0.000145316	0	0	0	0	0	0	0	0	0	0	0	0	0	0	0	0	0	0	0	0.000274486	0.000145316	0.000145316	0.000177608	0	0	0	0.00012917	0	0	0.000242193	0
ASV995	0	0	0	0	0	0	0	0	0	0	0.00389124	0	0	0	0	0	0	0	0	0	0	0	0	0	0	0	0	0	0	0	0	0	0	0	0	0	0	0	0	0	0	0	0	0	0	0	0	0	0
ASV996	0	0	0	0	0	0	0	0	0	0	0	0	0	0	0	0	0	0	0	0	0	0	0.00410114	0	0	0	0	0	0	0	0	0	0	0	0	0	0	0	0	0	0	0	0	0	0	0	0	0	0
ASV997	0	0	0	0	8.07e-05	0	0	0	0	0	0	0	0	0	0	0	0	0	0	0	0	0	0	0	0	0	0	0	0	0.000775019	0	0	0	0	0	0	0	0	0	0	0	0.00182452	0	0	0	0	0	0	0
ASV998	9.69e-05	4.84e-05	0	0	0.00240579	0	0	4.84e-05	8.07e-05	0	0.00132399	4.84e-05	0	0	0	0	0	0	0	0	0	0	0	0	0	0	0	0	0	0	0	0	0	0	0	0	0	0	0	0	0	0	0	0	0	0	0	0	0
ASV999	0	0	0	0	0	0	0	0	0	0	0.00385895	0	0	0	0	0	0	0	0	0	0	0	0	0	0	0	0	0	0	0	0	0	0	0	0	0	0	0	0	0	0	0	0	0	0	0	0	0	0
ASV1000	0	0	0	0	0.00156618	0.00100107	0	0	0	0	0.000952627	0.000629703	0	0	0	0	0	0	0	0	0	0	0	0	0	0	0	0	0	0	0	0	0	0	0	0	0	0	0	0	0	0	0	0	0	0	0	0	0
ASV1001	0	0	0	0	0	0	0	0	0	0	0	0	0	0.000145316	0.0021313	0.000113024	0.000274486	0	0	0	8.07e-05	6.46e-05	0	0	0	0.00012917	0.000694287	0	0.000355217	0	0	0	0	0	0	0	0	0	0	0	0	0	0	0	0	0	0	0	0
ASV1002	0	0	3.23e-05	0	0	0	0	0.000161462	0	0	0	0	0.000177608	0.000209901	4.84e-05	0	0	0	9.69e-05	0.000113024	0	0.000177608	0	0.000193755	0.000145316	0	0	8.07e-05	0	9.69e-05	0	0	0.000387509	0	0.000452094	0	0	0.000322924	0	0	0	8.07e-05	0.000113024	6.46e-05	0	0.000339071	0	0.000274486	6.46e-05
ASV1003	0.000161462	0	0	0	4.84e-05	8.07e-05	0	0.00012917	0.00025834	0	0.00224433	0.000484387	3.23e-05	0	0	6.46e-05	0	0	0.00012917	0	0	0	0	0	0	0	0	0	0	0	0	0	0	0	0	0	0	0.000113024	0	3.23e-05	0	0	0	0	0	0	0	0.000113024	0
ASV1004	0	0	0	0	0	0	0	0	0	0	0	0	0	0	0	0	0	0	0	0	0	0	0	0	0	0	0	0	0	0	0	0	0	0	0	0.000581264	0	0	0	0.000532825	0	0.000161462	0	0	0	0.000500533	0.000452094	0	0
ASV1005	0.00406885	0	0	0	0	0	0	0	0	0	0	0	0	0	0	0	0	0	0	0	0	0	0	0	0	0	0	0	0	0	0	0	0	0	0	0	0	0	0	0	0	0	0	0	0	0	0	0	0
ASV1006	6.46e-05	0.000306778	0	9.69e-05	0	0	0.00012917	0	8.07e-05	6.46e-05	8.07e-05	0	0	0	0	0	0	0	0	0	0	0	0	8.07e-05	0	0	0	0.00230891	0	8.07e-05	0	0	0	0	8.07e-05	0	0	8.07e-05	0	0	0.000161462	0.000161462	0	0	0	0	0	0	0
ASV1007	0	0	0	0	0	0	0	0	0	0	0	0	0	0	0	0	0	0	0	0	0	0	0	0	0	0	0	0	0	0	0	0.000193755	0.000161462	0.000113024	0.000532825	0	0	0	0	0	0	0	0	0.000193755	0.000371363	0.000355217	0	0	0
ASV1008	0	0	0	0	0	0.000355217	0	0	0	0	0	0	0.000113024	0	0.000113024	0.000322924	0.000209901	0	0	0	0	0	0	0	0	0	0	0	0.000387509	6.46e-05	0	0	8.07e-05	0	0	0	0.000952627	0	0.000145316	0	0	0	0	0	0.000209901	0.000387509	0	0	0.000209901
ASV1009	0	0	0	0	0	0	0	0	0	0	0.00114638	0	0.00100107	0	0	0	0	0	0	0	0.000581264	0	0	0	0.000177608	0	0	0.000581264	0	0	0	0	0	0	0	0	0	0	0	0	0	0	0	0	0	0	0	0	0
ASV1010	0	0	0	0	0	0.00012917	9.69e-05	0.00109794	0.000242193	0.000371363	3.23e-05	0	0	3.23e-05	0	0	3.23e-05	0	0	6.46e-05	0.000339071	9.69e-05	6.46e-05	8.07e-05	0	0	0	0	6.46e-05	0	0	0.000452094	0	0	0	0	0	0	4.84e-05	0	6.46e-05	0	0	6.46e-05	0	3.23e-05	0	0	0
ASV1011	0	0	0	0.00159848	0.0012917	0	0	0	0	0.000871896	0	0	0	0	0	0	0	0	0	0	0	0	0	0	0	0	0	0	0	0	0	0	0	0	0	0	0	0	0	0	0	0	0	0	0	0	0	0	0
ASV1012	0	0	0	0	0	0	0	0	0	0	0	0	0	0	0	0	0	0	0	0	0	0	0	0	0	0	0	0	0	0	0	0	0	0	0.00410114	0	0	0	0	0	0	0	0	0	0	0	0	0	0
ASV1013	0.000678141	0	0	0	0	0	0	0	0.00137243	0	0.000645849	0	0	0	0	0.00046824	0	0	0	0	0.000339071	0.000419802	0	0	0	0	0	0	0	0	0	0	0	0	0	0	0	0	0	0	0	0	0	0	0	0	0	0	0
ASV1014	0	0	0	0	0	0	0	0	0	0	0	0	0	0	0.00103336	0.00046824	0	0	0.000306778	0	0.000613556	0.000629703	0.000322924	0	0	0	0	0	0	0	0	0	0	0	0	0	0	0	0	0	0	0	0	0	0	0	0	0	0
ASV1015	0	0	0.00347144	0	0	0	0	0	0	0	0	0	0	0	0	0	0	0	0	0	0	0	0	0	0	0	0	0	0	0	0	0	0	0	0	0	0	0	0	0	0	0	0	0	0	0	0	0	0
ASV1016	0	0	0	3.23e-05	4.84e-05	0	0	3.23e-05	6.46e-05	4.84e-05	0	0	0	0	0	0	0	0	0	0	0	0	0	0	0	0	0	0	0	0.000484387	0	0	6.46e-05	0.000113024	0.000113024	0	0	0	0	0	0.000161462	0.000807311	0	0.000113024	9.69e-05	0.000193755	0	0	0
ASV1017	0	0	0	0	0	0	0	0	0	0	0	0	0.000403656	0.000242193	0	8.07e-05	0	0	0.000758872	0.000113024	0.000371363	0	0.00122711	0	0.000387509	0.00012917	0	0	0	0	0	0	0	0	0	0	0	0	0	0	0	0	0	0	0	0	0	0	0
ASV1018	0	0	0	0	0	0	0	0	0	0	0	0	0	0	0	0	0	0.000710434	0	0	0	0	0	0	0	0	0	0	0	0	0	0	0	0.000645849	0	0	0	0	0	0	0.000548971	0	0	0	0	0.00059741	0	0	0
ASV1019	0	0	0	0	0	0	0	0	0	0	0	0	0	0	0	0	0	0	0	0.000290632	0.000452094	0.00295476	0.000113024	0	0	0	0	0	0	0	0	0	0	0	0	0	0	0	0	0	0	0	0	0	0	0	0	0	0
ASV1020	0	0	0.00085575	0	0	0	0.000452094	0	0.000678141	0.000678141	0	0	0.000484387	0	0	0.000403656	0	0	0	0	0	0	0	0	0	0	0	0	0	0	0	0	0	0	0	0	0	0	0	0	0	0	0	0	0	0	0	0	0
ASV1021	0	0	0	0	0	0.000484387	0.000145316	0	0.000193755	0	3.23e-05	0.0027933	4.84e-05	0	0	0	0	0	0	0.000177608	0	0	0	0	0	0	1.61e-05	0	0	0	0	0	0	0	0	0	0	0	0	0	8.07e-05	0	0	0	0	0	0	0	0
ASV1022	0	0	0	0	0	0	0	0	0	0	0	0	0	0	0	0	0	0	0	0	0	0	0	0	0	0	0	0	0	8.07e-05	0	0	0	0.000161462	0	0	0	0	0	0	0	0.00351988	0	6.46e-05	0	0	0	0.000193755	0
ASV1023	0	0	0	0	0	0	0	0	0	0	0	0	0	0	0	0	0	0	0	0	0	0	0	0	0	0	0	0	0	0.00271257	0	6.46e-05	0	0	0	0.00046824	0	0	0	0	0	0.000145316	0	0	0	0	0	0	0
ASV1024	0	0	0	0	0	0	0	0	0	0	0	0	0	0	0	0.00146931	0	0.000661995	0	0	0	0.000242193	0	0.00119482	0	0	0	0	0	0	0	0	0	0	0	0	0	0	0	0	0	0	0	0	0	0	0	0	0
ASV1025	0	0	0	0	0	0	0	0	0	0	0	0	0	0	0	0	0	0	0	0	0	0	0	0	0	0	0	0	0	0	0	0	0	0	0	0	0	0	0	0	0	0	0	0	0	0	0	0	0
ASV1026	0	0	0	0	0	0	0	0	0	0.000113024	0	0	0	0	0	0	0	0	0	4.84e-05	0	0	0	0	0	0	0	0	0	0	0	0	0	0	0	0	0	0.000161462	0	0	0.00285788	0.000177608	0.000177608	0	0	0.000209901	0	0	0
ASV1027	0	0.000113024	0.000161462	6.46e-05	0.000209901	0	6.46e-05	0	0.00059741	0.000581264	0.000629703	0.000177608	0	0	0	0	0	0	0	0	0	0	0	0	0	0	0	0	0	0	0	0	9.69e-05	0	0	0	0	0	0	0	0	0	6.46e-05	0	0	0	0	0	8.07e-05
ASV1028	0.000435948	0	0	0	0	0	0	0	0	0	0	0	0	0	0	0	0	0	0	0	0	0	0	0	0	0	0	0	0	0.0010818	0	0	0	0	0	0	0	0	0	0	0	0.00124326	0	0	0	0	0	0	0
ASV1029	0	0	0	0	0	0	0	0	0	0.000613556	0	0	0	0	0.000581264	0	0	0	0.000322924	0	0	0	0	0	0	0.000209901	0	0	0	0	0	0	0.000226047	0	0	0	0	0	0	0	0.000500533	0	0	0	0	0	0.000419802	0	0
ASV1030	0	0	0	0.000161462	0	0	0.000161462	0	8.07e-05	0.000371363	6.46e-05	0	0	0	0	0	0	0	0	0	0	0.000177608	0.000193755	0	8.07e-05	0	0	0	0	0	0	0	0	0.000629703	0	0	0	0	0.000339071	0	0.00025834	0	0	0	0.00012917	0.000306778	0	0	8.07e-05
ASV1031	0	0.000193755	0	0	0	0	0	0	0	0	0	0	0	0	0	0	0	0	0	0	0	0	0	0	0	0	0	0	0	0	0	0	0.00230891	0	0	0	0	0	0	0	0.00103336	0	0	6.46e-05	0.000145316	0	0	0	0
ASV1032	0	0	0	0	0.00164691	0	0	0	0	0	0	0	0	0	0	0	0	0	0	0	0	0	0	0	0	0	0	0	0.00242193	0	0	0	0	0	0	0	0	0	0	0	0	0	0	0	0	0	0	0	0
ASV1033	0	0	0	0	0	0	0	0	0	0	0	0	0	0	0	0	0	0	0	0	0	0	0	0	0	0	0	0	0	0	0	0.000419802	0.000290632	0.000193755	0.000920335	0	0	0	0	0	0	0	0	0.000242193	0.000355217	0.000306778	0	0	0
ASV1034	0	0	0	0	0	0	0	0	0	0	0	0	0.000532825	0	0.00195369	3.23e-05	0	0	0	0	0	0	4.84e-05	0	0.000484387	0	0.000581264	0	0	0	0	0	0	0	0	0	0	0	0	0	0	0	0	0	0	0	0	0	0
ASV1035	0	0	0	0	0	0	0	0	0	0	0	0	0	4.84e-05	3.23e-05	0	1.61e-05	0.00339071	0	0	0	0	0	0.000306778	0	0	0	0	0	0	0	0	0	0	0	0	0	0	0	0	0	0	0	0	0	0	0	0	0
ASV1036	0	0	0	0	0	0	0	0	0	0	0	0	0	0	0	0	0	0	0	0	0	0	0	0	0	0	0	0	0	0	0	0	0	0	0	0.000193755	0.000387509	0	0	0	0	0.000548971	0	0	0	0	0.000532825	0.000435948	0
ASV1037	0	0	0	0	0	0	0	0	0	0	0	0	0	0	0	0	0	0	0	0	0.000629703	0	0	0	0	0	0	0	0	0	0	0	0	0	0	0	0	0.00114638	0	0.000661995	0	0	0	0	0.00101721	0	0	0	0
ASV1038	0	0	0	0	0	0	0	0	0	0	0	0	0.00347144	0	0	0	0	0	0	0	0	0	0	0	0	0	0	0	0	0	0	0	0	0	0	0	0	0	0	0	0	0	0	0	0	0	0	0	0
ASV1039	0	0	0.0032131	0	0	9.69e-05	0	0	0	0	0	0	0	0	0	0	0	0	0	0	0	0	0	0	0	0	0	0	0	0	0	0	0	0	0	0	0	0	0	0	0	0	0	0	0	0	0	0	0
ASV1040	0	0	0	0.000113024	0	9.69e-05	0	0	0.000145316	0	6.46e-05	0	0	0	0	0	0	0	0	0	0	0	0	0.00127555	0	0	0	0	0	0	0	9.69e-05	0.000113024	0.000113024	0.000242193	0	0	0	0	0	0.000209901	0	0	0.000339071	0.000145316	0.000209901	0	0	0
ASV1041	0	0	0	0	0	0	0	0	0	0	0	0	0	0	0	0	0	0	0	0	0	0	0	0	0	0	0	0	0	0.000629703	0	0	0.000274486	3.23e-05	0.000177608	0	0	0	0	0	9.69e-05	0.000871896	0	8.07e-05	0.000274486	0.000145316	0	0	0
ASV1042	0	0	0	0	0.00303549	0	0	0	0	0	0	0	0	0	0	0	0	0.000371363	0	0	0	0	0	0.000355217	0	0	0	0	0	0	0	0	0	0	0	0	0	0	0	0	0	0	0	0	0	0	0	0	0
ASV1043	0	0	0	0	0	0	0	0	0	0	0	0.000758872	6.46e-05	0.000306778	0	1.61e-05	0.00196984	3.23e-05	0	0.000532825	0	0	0	0	3.23e-05	3.23e-05	0	0	0	0	0	0	0	0	0	0	0	0	0	0	0	0	0	0	0	0	0	0	0
ASV1044	0	0	0.00247037	0	0	0	0	0	0.000984919	0	0	0	0	0	0	0	0	0	0	0	0	0	0	0	0	0	0	0	0	0	0	0	0	0	0	0	0	0	0	0	0	0	0	0	0	0	0	0	0
ASV1045	0	0	0	0	0	0	0	0	0	0	0	0	0.00227662	0	0	0	0	0	0	0	6.46e-05	0	0	0	0.00117867	0	0	0	0	0	0	0	0	0	0	0	0	0	0	0	0	0	0	0	0	0	0	0	0
ASV1046	0	0	0	0	0	0	0	0	0	0	0.00343914	0	0	0	0	0	0	0	0	0	0	0	0	0	0	0	0	0	0	0	0	0	0	0	0	0	0	0	0	0	0	0	0	0	0	0	0	0	0
ASV1047	0	0	0	0	0	0	0	0	0	0	0	0	0	0	0.000161462	0.000177608	0.00143701	0	0	0	0.00025834	8.07e-05	0	0.000209901	0	0	0	0	0.00153389	0	0	0	0	0	0	0	0	0	0	0	0	0	0	0	0	0	0	0	0
ASV1048	0	0	0	0	0	0	0	0	0	0	0	0	0	0	0	0	0	0	0	0	0	0	0	0	0	0	0	0	0.00410114	0	0	0	0	0	0	0	0	0	0	0	0	0	0	0	0	0	0	0	0
ASV1049	0	0	0	0	0.00046824	0	0	0	0	0	0.00289017	0.000113024	0	0	0	0	0	0	0	0	0	0	0	0	0	0	0	0	0	0	0	0	0	0	0	0	0	0	0	0	0	0	0	0	0	0	0	0	0
ASV1050	0	0	0	0	0	0	0	0	0	0	0	0	0	0	0	0	0	0	0	0	0	0	0	0	0	0	0	0	0	0	0	0.000193755	0.000339071	0	0.000371363	0	0	0	0	0	0	0	0	0.000435948	0.000484387	0.000193755	0	0	0
ASV1051	0.000177608	0	0	0.000532825	0	0	0	0	0	0	0	0	0	0	0.000226047	0	0	0	0.000161462	0	0	0	0	0.00012917	0	0	0	0	0	0	0	0	0.000113024	0	0	0.000177608	0	0	0	0	0.000322924	0	0.000322924	0.000274486	0.000322924	0	0	0	0
ASV1052	0	0	0	0	0	0	0	0	0	0	0	0	0	0	0.000339071	0	0	0	0	0	0	0	0	0	0	0.000403656	0	0	0	0.000694287	0	0.000113024	0	0	0	0	0	0	0	0	0	0	0	0	0	0	0	0	0
ASV1053	0	0	0	0	0	0	0	0	0.000113024	0	0	0	0	0	0	0	0	0	4.84e-05	0	0	0	0	0	0	0	0	0	0	0	0.000113024	0	0	8.07e-05	6.46e-05	9.69e-05	0	0	0	3.23e-05	0	0	0.000661995	0.000113024	0	0	0	0.000435948	0
ASV1054	0	0	0	0	0	8.07e-05	0.000242193	0.000548971	0	0	0	3.23e-05	0	0.000145316	0	0	0	0	0	0	0	0	6.46e-05	0	4.84e-05	0	0	0	8.07e-05	0	0	0	0	0	0.000371363	0	8.07e-05	0	0	0.000177608	0	0	0.000500533	0	0	0	0	0.000807311	0.000145316
ASV1055	0	0.000419802	4.84e-05	0	0	0	0	0	0	0	0	0	0	0	0	0.000306778	0	0	0	0	0	0	0	0	0	8.07e-05	0	0	0	0	0	0.00121097	0	0.00103336	0	0	0	4.84e-05	0	0	0.000322924	0	0	0	0	0	0	0	0
ASV1056	0.000452094	0	0	0	0	0.000888042	0	0	0	0	0	0	0	0.000145316	0	0	0	0	0	0	0	0	0	0	0	0	0	0	0	0	0	0.000226047	0	0	0	0	0	0	0.000113024	0	0	0.000823457	0	0	0	0	0	0.000565118	0
ASV1057	0	0	0	0	0	0	0	0	0	0	0	0	0	0	0	0	0	0	0	0	0	0	0	0	0	0	0	0	0	0	0	0	0	0	0	0	0	0	0	0	0	0	0	0.00314851	3.23e-05	0	0	0	0
ASV1058	0	8.07e-05	0	0.000161462	0	0	0	0	0	6.46e-05	0	0	0	0	0	0	0	0	0	0	0	0	0	0	0	0	0	0	0	0	0	0	0	0	0	0	0	0	0	0	0	0	0	0	0	0	0	0	0
ASV1059	0	0	0	0	0	0	0	0	0	0	0	0	0.000791165	0	0	0	0.000419802	0	0	0	0	0	0	0	0	0.00193755	0	0	0	0	0	0	0	0	0	0	0	0	0	0	0	0	0	0	0	0	0	0	0
ASV1060	0	0	0	0	0	0	0	0	0	0	0	0	0	0	0	0	0	0	0	0	0	0	0	0	0	0	0	0	0	0	0	0	0	0	0	0	0	0	0	0	0	0	0	0	0	0	0	0	0.00339071
ASV1061	0	0	0	0	0	0	0	0	0	0	0	0	0	0	0	0	0	0	0	0	0	0	0	0	0	0	0	0	0	0	0	0	0.000516679	0	0	0	0	0	0	0	0	0	0	0.000807311	0.0010818	0.00085575	0	0	0
ASV1062	0	0	0	0	0	0	0	0	0	0	4.84e-05	0	0	0	0	0	0	0	0	0	0	0	0	0	0	0	0	0	0	0	8.07e-05	0	0	0	0	0	0	0	0	0	0.000113024	0.000290632	4.84e-05	0	0	0	0	0.00025834	9.69e-05
ASV1063	0	0	0	0	0	0	0	0	0	0	0	0	0.000355217	0	0	0.000355217	0.000113024	0	6.46e-05	0	0	0	0.000193755	0	0	0	0	0	0	0	0	0	0	0	0	0	0	0	0	0.00219589	0	0	0	0	0	0	0	0	0
ASV1064	0	0	0	0	0	0	0	0	0	0	0	0	0.00012917	0	0	0	0	0	0	0	0.000226047	0	0	0	0	0	0	0	0	0	0.000452094	0	0	0	0	0	0	0	0	0	0.00264798	0	0	0	0	0	0	0	0
ASV1065	0	0	0	0.000920335	0	0	0	0	0.00111409	0	0	0	0	0	0	0	0.000613556	0	0.000678141	0	0	0	0	0	0	0	0	0	0	0	0	0	0	0	0	0	0	0	0	0	0	0	0	0	0	0	0	0	0
ASV1066	0	0	0	0	0	0	0	0	0	0	0	0	0	0	0	0	0	0	0.00046824	0	0	0	0	0	0	0	0	0	0	0	0	0	0	0	0	0	0	0	0	0	0	0	0.000839603	0	0	0	0	0	0
ASV1067	0	0.000419802	0.000306778	0	0.00163077	0.000339071	0.000193755	0	0	0	0.000403656	0	0	0	0	0	0	0	0	0	0	0	0	0	0	0	0	0	0	0	0	0	9.69e-05	0	0	0	4.84e-05	0	0	0	0	1.61e-05	0	0	0	0	0	0	0
ASV1068	0	0.000306778	0	0.00121097	0.000516679	0.000161462	0	0	0	0.000355217	0.000387509	4.84e-05	0	0	0	0	0	0	0	0	0	0	0	0	0	0	0	0	0	0	0	0	0	0.00012917	0	0	0	0	0	0	0	0	0	0	0	0	0	0	0
ASV1069	0	0	0	0	0	0.000920335	0	0	0	0	0	0.000516679	0	0.0015016	0	0	0	0	0	0	0	0	0	0	0	0	0	0	0	0	0	0	0	0	0	0	0	0	0.000548971	0	0	0	0	0	0	0	0	0	0
ASV1070	0	0	0	0	0	0	0	0	0	0	0	0	0	0	0	0	0	0	0	0	0	0.00211516	0	0	0	0	0	0	0	0	0	0	0	0	0	0	0	0	0	0	0	0	0	0	0	0	0	0	0
ASV1071	0	0	0	0	0.000823457	0	0	0	0	0	0.000678141	0.00059741	0	0	0	0	0	0	0	0	0	0	0	0	0	0	0	0	0	0	0	0	0	0	0	0	0	0.000516679	0	0	0	0	0	0	0	0	0	0	0
ASV1072	0	0	0	0	0	0	0	0	0.000242193	0	0.000322924	0	0	0	0	0	0	0.00140472	0.000322924	0	0	0	0	0	0	0	0	0	0	0	0	0.000209901	0	0	0	0	0	0	0	0	0	0	0	0	0	0	0	0	0
ASV1073	0	0	0	0	0.000823457	0	0	0	0.000226047	0	0.00227662	0	0	0	0	0	0	0	0	0	0	0	0	0	0	0	0	0	0	0	0	0	0	0	0	0	0	0	0	0	0	0	0	0	0	0	0	0	0
ASV1074	0	0	0	0	0	0	0	0	0	0	0	0	0	0	0	0	0	0	0	0	0	0	0.00343914	0	0	0	0	0	0	0	0	0	0	0	0	0	0	0	0	0	0	0	0	0	0	0	0	0	0
ASV1075	0	0	0	0	0	0	0	0	0	0	0	0	0	0	0	0	0	0	1.61e-05	0.000823457	0.0010495	0.000871896	0.000435948	0	0	0	0	0	0	0	0	0	0	0	0	0	0	0	0	0	0	0	0	0	0	0	0	0	0
ASV1076	0	0	0	0	0	0	0	0	0	0	0.000177608	0	0	0	0	0	6.46e-05	0	0	0	0	0.000161462	0.000371363	0	0	0	0	0	0	0	0	0.0010818	0.0012594	0.000209901	0	0	0	0	0	0	0	0	0	0	0	0	0	0	0
ASV1077	0	0.00012917	0	0	0.00059741	0	0	0.000532825	0	0	0.00198599	0	0	0	0	0	0	0	0	0	0	0	0	0	0	0	0	0	0	0	0	0	0	0	0	0	0	0	0	0	0	0	0	0	0	0	0	0	0
ASV1078	0	0	4.84e-05	0.00025834	0	0	8.07e-05	0	0	0	3.23e-05	0	0	8.07e-05	0	3.23e-05	0	0	0	6.46e-05	0.000968773	0.000387509	0	0.000145316	0.000177608	0	3.23e-05	0	0	0	0.000113024	0	0	0.000145316	0	0	8.07e-05	0.000209901	0	0	0	0	0	0.000161462	3.23e-05	0	0	0.000113024	0
ASV1079	0	0	3.23e-05	0	0	0	0	0	0.000242193	0.00303549	9.69e-05	0	0	0	0	0	0	0	0	0	0	0	0	0	0	0	0	0	0	0	0	0	0	0	0	0	0	0	0	0	0	0	0	0	0	0	0	0	0
ASV1080	0	0	0	0	0.00164691	0	0	0	0	0	0.00153389	0	0	0	0	0	0	0	0.00012917	0	0	0	0	0	0	0	0	0	0	0	0	0	0	0	0	0	0	0	0	0	0	0	0	0	0	0	0	0	0
ASV1081	0	0	0	0	0	0	0	0	0	0	0	0	0	0	0	0	0	0	0	0	0	0	0	0	0	0	0	0	0	0	0	0	0	0	0	0	0	0	0.000274486	0	0.00282559	0	0	0	0	0	0.000290632	0	0
ASV1082	0	0	0	0	0	0	0	0	0	0	0	0	0	0	0	0.00240579	0	0	0	0	0	0.000565118	1.61e-05	0	0	0	0	0	0	0	0	0	0	0	0	0	0	0	0	0	0	0	0	0	0	0	0	0	0
ASV1083	0	0	0	0	0	0	0	0	0	0	0	0	0.00106565	0.000871896	0	0	0	0	0	6.46e-05	0	0	0	0	0.000161462	0	0	0	0	0	0	0	0	0	0	0	0.00101721	0	0	0	0	0	0	0	0	0	0	0	0
ASV1084	0	0	0	0	0	0	0	0	0	0	0	0	0	0	0	0	0.000984919	0	0	0	0	0	0	0	0	0	0	0	3.23e-05	0	0.00232506	0	0	0	0	0	0	0	0	0	0	0	3.23e-05	0	0	0	0	0	0
ASV1085	0	0	0	0	0	0	0	0	0	0	0	0	0	0	0	0	0	0	0	0	0	0	0	0	0	0	0	0	0	0	0	0	0	0	0	0	0	0	0	0	0	0	0	0	0	0	0	0	0
ASV1086	0	0	0	0	0	0.000226047	0	0	0	0	0.00188911	0	0	0	0	0	0	0	0	0	0	0	0	0	0	0	0	0	0	0	0	0	0	0	0	0	0	0	0	0	0	0.00106565	0	0	0	0	0	0	0
ASV1087	0	0	0	0	0	0.000177608	9.69e-05	0	0.000177608	0.000581264	0.000758872	0.00151775	0	0	0	0	0	0	0	0	0	0	0	0	0	0	0	0	0	0	0	0	0	0	0	0	0	0	0	0	0	0	0	0	0	0	0	0	0
ASV1088	0	0	0	0	0	0	0	0.00326154	0	0	0	0	0	0	0	0	0	0	0	0	0	0	0	0	0	0	0	0	0	0	0	0	0	0	0	0	0	0	0	0	0	0	0	0	0	0	0	0	0
ASV1089	0	0	0	0	0	0	0	0	0	0	0	0	0	0	0	0.00205057	0	0	0	0	0	0.000920335	0	0	0	0	0	0	0	0	0	0	0	0	0	0	0	0	0	0	0	0	0	0	0	0	0	0	0
ASV1090	0	0.000193755	0	0	0	0	0	9.69e-05	0.000387509	0	0	0	0	0	0	0	0	0	0	0	0	0.000516679	0	0	0	0	0	0	0	0	0	0	8.07e-05	0	0	0	0	0	0	0	0	0	0	0	0	0	0	8.07e-05	0.000274486
ASV1091	0	0	0	0	0	0	0	0	0	0	0	0	0	0	0	0	0	0	0	0	0	0	0	0	0	0	0	0	0	0	0	0	0	0	0	0	0.000823457	0	0	0	0	0	0	0	0	0	0	0	0
ASV1092	0	0	0	0	0	0	0	0	0	0	0	0	0	0	0	0	0	0	0	0	0	0.00155004	0	0	0.00163077	0	0	0	0	0	0	0	0	0	0	0	0	0	0	0	0	0	0	0	0	0	0	0	0
ASV1093	0.00187296	0	0	0	0	0	0	0	0	0	0	0	0	0	0	0	0	0	0	0	0	0	0	0	0	0.00116253	0	0	0	0	0	0	0	0	0	0	0	0	0	0	0	0	0	0	0	0	0	0	0
ASV1094	0	0.000306778	0	0	0.000742726	0	0	0	0	0.000452094	0	0.00012917	0	0	0	0	0	0	0	0	0	0.000742726	0	0	0	0	0	0	0	0	0	0	0	0	0	0	0.000645849	0	0	0	0	0	0	0	0	0	0	0	0
ASV1095	0	0	0	0	0	0	0	0	0	0.000113024	0	0	0	0	0	0	0	0.000209901	0	0	0	0.000516679	0	0.00012917	0	0	0	0	0	0	0	0	0	0	0	0	0	0	0	0	0.000484387	0	0	0	0	0	3.23e-05	0	0
ASV1096	0	0	0	0	0	0	0	0	0	0	0	0	0	0	0	0	0.000452094	0	0	0	0	0	0	0	0	0	0	0	0	0	0	0	0	0	0	0	0	0	0.000193755	0	0	0	0	0	0	0	0	0	0
ASV1097	0	0	0	0	0	0	0	0	0	0	0	0	0	0	0	0	0	0	0	0	0	0	0	0	0	0	0	0	0	0	0	0	0	0	0	0	0	0	0	0	0	0	0.00310007	0	0	0	0	0	0
ASV1098	0	0	0	0	0	0	0	0	0	0	0	0	0	0	0.000161462	0	0	0	0	0	0	0	0	0	0	0	0.000322924	0	0	0	0	0	0.00272871	0	0	0	0	0	0	0	0	0	0	0	0	0	0	0	0
ASV1099	0	0	0	0	0	0	0	0	0	0	0	0	0	0	0	0	0	0	0	0	0	0	0	0	0	0	0	0	0	0	0	0	0	0	0	0	0	0	0	0	0	0	0	0	0	0	0.000371363	0	0
ASV1100	0	0	0	0	0	0	0	0	0	0	0	0	0	0	0	0	0	0	0	0	0	0	0	0	0	0	0	0	0	0	0	0	0	0	0	0	0	0	0	0	0.00332612	0	0	0	0	0	0	0	0
ASV1101	0	0	4.84e-05	0	0.0019214	6.46e-05	0	6.46e-05	0	0	0.00117867	0	0	0	0	0	0	0	0	0	0	0	0	0	0	0	0	0	0	0	0	0	0	0	0	0	0	0	0	0	0	0	0	0	0	0	0	0	0
ASV1102	0	0	0	0	0	0.000145316	0	0	0	0	0	0	0	0.00025834	6.46e-05	0	0	0	0	0	0	0	0	0.00012917	0.000161462	0.00153389	0.000113024	0	0.00046824	0	0	0.00012917	0	0	0	0	0	0	0	0	0	0	0	0	0	0	0	0	0
ASV1103	0	0	0.00206672	0	0	0	0	0.000888042	0	0	0	0	0	0	0	0	0	0	0	0	0	0	0	0	0	0	0	0	0	0	0	0	0	0	0	0	0	0	0	0	0	0	0	0	0	0	0	0	0
ASV1104	0	0	0	0	0	0	0	0	0	0	0	0	0	0	0	0	0	0	0	0.000678141	0	0	0	0	0	0	0	0	0	0	0.00247037	0	0	0	0	0	0	0	0	0	0	0	0	0	0	0	0	0	0
ASV1105	0	0	0	0	0	0	0	0	0.000145316	0	0	0	0	0	0	0	8.07e-05	0	0	0	0.00012917	0	0	0	0	0	0	0	0	0	0	0	0	0	0	0	0	0	0	0	0	0	0.000661995	0	9.69e-05	0	0.00151775	0	0
ASV1106	0	0	0	0.000419802	0	0	0	0	0	0.00266413	0	0	0	0	0	0	0	0	0	0	0	0	0	4.84e-05	0	0	0	0	0	0	0	0	0	0	0	0	0	0	0	0	0	0	0	0	0	0	0	0	0
ASV1107	0	0	0	0	0	0	0	0	0	0	0	0	0	0	0	0	0	0	0	0	0	0	0	0	0.00311622	0	0	0	0	0	0	0	0	0	0	0	0	0	0	0	0	0	0	0	0	0	0	0	0
ASV1108	0	0	0	0	0	0	0	0	0	0	0	0	9.69e-05	0	0	0.000177608	9.69e-05	0	0	0	0	4.84e-05	0.00012917	0.00242193	0	0	0	0	0	0	0	0	0	0	0	0	0	0	0	0	0	0	0	0	0	0	0	0	0
ASV1109	0.0010818	0	0	0	0	0	0	0.00208286	0	0	0	0	0	0	0	0	0	0	0	0	0	0	0	0	0	0	0	0	0	0	0	0	0	0	0	0	0	0	0	0	0	0	0	0	0	0	0	0	0
ASV1110	0	0	0.00127555	0	0	0	0	0	0	0	0	0	0	0	0	0	0	0	0	0	0	0	0	0	0	0	0	0	0	0	0	0.0017115	0	0	0	0	0	0	0	0	0	0	0	0	0	0	0	0	0
ASV1111	0	0	0.000177608	0	0	0	0	0	0	0	0	0	0	0.000145316	0.000226047	0	0	0	0	0	0.000113024	0	0	9.69e-05	0.000403656	0	0	0.000209901	0	0	0	0	0	0.000500533	0	0	0.000435948	0	0	0	0	0	0	0.000209901	0	0	0	0	0
ASV1112	0	0	0	0.000274486	0	0	0	0.00012917	0	0	0.000193755	0	6.46e-05	0	0	0	0	0	0	0	0	0	0	0	1.61e-05	0	0	0	0	8.07e-05	0	0.000209901	0	9.69e-05	0.000694287	0	0	0	0	0	0	9.69e-05	0	0.000290632	6.46e-05	0.00012917	0	0	0
ASV1113	0	0	0	0	0	0	0	0.00025834	0	0.000226047	0	0	0	0	0	0	0	0	0	0.000113024	6.46e-05	0.00012917	6.46e-05	0	0	0	0	0	0	0	9.69e-05	0	9.69e-05	0	0	0.000113024	0	0	0	0	9.69e-05	0.00012917	0.000209901	0	0.000339071	0.00012917	0	0	0
ASV1114	0	0	0	0	0	0	0	0	0	0	0	0.00329383	0	0	0	0	0	0	0	0	0	0	0	0	0	0	0	0	0	0	0	0	0	0	0	0	0	0	0	0	0	0	0	0	0	0	0	0	0
ASV1115	0	0	0	0	0	0	0	0	0	0	0	0	0	0	0	0	0	0	0	0	0	0	0	0	0	0	0	0	0	0.000403656	0	0	0	0.00025834	0	0	0	0	1.61e-05	0	0	0.000613556	0	0.00012917	0.00012917	0.000355217	0	0	0
ASV1116	0	0	0	0	0	0	0	0	0	0	0	0	0	0	0	0	0	0	0	0	0	0	0	0	0	0	0	0	0.00290632	0	0	0	0	0	0.00046824	0	0	0	0	0	0	0	0	0	0	0	0	0	0
ASV1117	0	0	0	0	0	0.0010495	0	0	0	0	0	0.00224433	0	0	0	0	0	0	0	0	0	0	0	0	0	0	0	0	0	0	0	0	0	0	0	0	0	0	0	0	0	0	0	0	0	0	0	0	0
ASV1118	0	0	0	0	0	0	0	0	0	0	0	0	0	0	0	0	0	0	0	0	0	0	0	0.000339071	0	0	0.00085575	0	0	0	0	0	0	0.000226047	0	0	0	0	0	0	0	0	0	0	0	0	0	0	0
ASV1119	0	0	0	0	4.84e-05	0	0	0.000209901	0	0	0	0	0	0	0	0	0	0	0	0	0	0	0	0	0	0	0	0.000775019	0	0	0	0	0	0	0.00119482	0	0	0	0	0	0	0	0	0.00025834	0	0.000161462	0	0	0
ASV1120	0	0	0	0	0	0	0	0	0	0	0.00295476	0	0	0	0	0	0	0	0	0	0	0	0	0	0	0	0	0	0	0	0	0	0	0	0	0	0	0	0	0	0	0	0	0	0	0	0	0	0
ASV1121	0	0	0	0	0	0	0	0	0	0	0	0	0	0	0	0.000661995	0.000532825	0	0	0	0	0	0	0	0	0	0	0.000452094	0	0	0	0	0	0	0	0	0	0.000177608	0	0	0	0	0	0.000145316	0	0.000209901	0.000322924	0	0
ASV1122	4.84e-05	0	0	0	6.46e-05	0	0	6.46e-05	0	0	0	0	0	0	0	0	0	0	0	0	0	0	0	0	0	0.00046824	0	0.000209901	0	0	0	0	0	0.000161462	0	8.07e-05	0	0.00103336	0	0	0	0	0	0.00072658	0	0	0	0	0
ASV1123	0	0	0.000419802	0.000145316	0	0	0	1.61e-05	8.07e-05	0	0	0	0	0.000452094	0	0	0	0	0	0	0	0	0	0	0	8.07e-05	0	0	0	0.000322924	0	0	0	0	0.000209901	0.000888042	0	0	0	0.000226047	0	0	0	0	0	0	0	9.69e-05	0
ASV1124	0	0	0.000161462	0	0	0	0	0	0	0.000516679	0	0	0	0	0	0	0	0	0	0	0	0	0	0	0	0	0	0	0	0	0	0	0	0	0	0	0	0	0	0	0	0	0	0	0	0.000532825	0	0.000387509	0
ASV1125	0	0	0	0	0	0.00269642	0	0	0	0	0	0	0	0	0	0	0	0	0	0	0	0	0	0	0	0	0	0	0	0	0	0	0	0	0	0	0	0	0	0	0	0	0	0	0	0	0	0	0
ASV1126	0	0	0	0	0	0	0	0	0	0	0	0	0	0	0	0	0	0	0.00100107	0	0	0.00188911	0	0	0	0	0	0	0	0	0	0	0	0	0	0	0	0	0	0	0	0	0	0	0	0	0	0	0
ASV1127	0	0	0	0	0	0	0	0	0	0	0	0	0	0	0	0	0	0	0	0	0	0	0	0	0	0	0	0	0	0	0	0	0	0	0	0	0	0	0	0	0	0.00240579	0	0	0	0	0	0.000775019	0
ASV1128	0	0	0	0	0	0	0.00122711	0	0.00205057	0	0	0	0	0	0	0	0	0	0	0	0	0	0	0	0	0	0	0	0	0	0	0	0	0	0	0	0	0	0	0	0	0	0	0	0	0	0	0	0
ASV1129	0	0	0	0	0	0.00318081	0	0	0	0	0	8.07e-05	0	0	0	0	0	0	0	0	0	0	0	0	0	0	0	0	0	0	0	0	0	0	0	0	0	0	0	0	0	0	0	0	0	0	0	0	0
ASV1130	0	0	0	0	0	0	0	0	0	0	0	0	0.000242193	0	0	0	0	0	0.000274486	0	0	0	0	0	0	0	0	0	0	0	0	0	0	0	0	0	0	0	0	0	0	0	0	0	0.00025834	0	0	0	0
ASV1131	0	0	0	0	0	0	0	0	0	0	0	0	1.61e-05	0	6.46e-05	9.69e-05	0.00272871	0	0	0	0	6.46e-05	0.000193755	0	0	0	0	0	6.46e-05	0	0	0	0	0	0	0	0	0	0	0	0	0	0	0	0	0	0	0	0
ASV1132	0	0	0	0.000242193	0	0	0	0	0	0.000193755	0	0	0	0	0	0.000306778	0	0	0	0	0	0.00012917	0	0	0	0.00012917	0	0	0	0	0	0.00025834	0	0	0	0	0	0	0	0	0.000484387	0	0	0.000306778	0	0.000226047	0	0	0
ASV1133	0	0	0	0	0	8.07e-05	0	0	0	0.000193755	0	0	0	0	0	0	0	0	0	0	0	0	0	0	0	0	0	0	0	0	0	0	0	0	0	0	0	0	0	0	0.00247037	0	0	0	0	0	0	0	0
ASV1134	0	0	0	0	0.00201828	0	0	0	0	0	0.00100107	0	0	0	0	0	0	0	0	0	0	0	0	0	0	0	0	0	0	0	0	0	0	0	0	0	0	0	0	0	0	0	0	0	0	0	0	0	0
ASV1135	0	0	0	0	0	0	0	0	0	0	0	0	0	0	0	0	0	0	0	0	0	0	0	0	0	0	0	0.000387509	0	0	0	0	0	0	0	0	0	0	0	0	0	0	0.000791165	0	0	0	0	0.000484387	0.00132399
ASV1136	0	0	0	0.00117867	0	0.00138857	0	0	0	0.000371363	0	0	0	0	0	0	0	0	0	0	0	0	0	0	0	0	0	0	0	0	0	0	0	0	0	0	0	0	0	0	0	0	0	0	0	0	0	0	0
ASV1137	0	0	0	0.000435948	0	0	0	0	0	0	0	0	0	0.000113024	0	0.000193755	0	0.000322924	0	0	0	0	0	0	0	0	0.000371363	0	0	0	0	0	0	0	0	0	0	0	0	0	0.000710434	0	0	0	0	0	0.000355217	0	0
ASV1138	0	0	0	0.000500533	0	0	0	0	0	0	0	0	0	0	0	0	0	0	0	0	0.00012917	0	0.00208286	0	0	0	0	0	0	0	0	0	0	0	0	0	0	0.000242193	0	0	0	0	0	0	0	0	0	0	0
ASV1139	0	0	0	0	0	0	0	0	0	0	0	0	0.000209901	0.000161462	0.000387509	0.000145316	0.000694287	0	0	0.000113024	0.000565118	0	0	0	0	0	0.000161462	0	0.00059741	0	0	0	0	0	0	0	0	0	0	0	0	0	0	0	0	0	0	0	0
ASV1140	0	0	1.61e-05	8.07e-05	0	0	0.000242193	0.00012917	0	0.000904188	0	4.84e-05	4.84e-05	0.000452094	0	0	0	0	0	0	0	0	0	0	0	4.84e-05	0	0	0	0	0	0	0	0	0	0	0.00025834	0	0	0	0	0	0	0	0	0	0	0	0
ASV1141	0	0	0	0	0	0	0	0	0	0	0	0	0	0	0	0	0	0.00184067	0	0	0	0.000500533	0	0	0	0	0	0	0.000161462	0	0	0	0	6.46e-05	0	0	0	0	0	0	0.000145316	0	0	0	0	0	0	0	0
ASV1142	0	0.00046824	0	0	0	0	0	0	0	0	0.000661995	0	0	0	0	0	0	0	0	0.000322924	0	0	0	0	0	0	0	0	0	0	0.000500533	0.000871896	0	0	0	0	0	0	0	0	0	0	0	0	0	0	0	0	0
ASV1143	0	0	0	0	0	0	0	6.46e-05	0	0	0	0	0.000355217	0	0	0	0	0	9.69e-05	0	0	0	0	0	0	0	0	0	0	0	0	0	0	0	0	8.07e-05	0	0	0.00012917	0	0	0	0	0	0	0	0	0.000113024	0
ASV1144	0	0	0	0	0	0	0	0	0	0	0	0	0	0	0	0	0	0	0	0	0	0	0	0	0	0	0	0	0.0025834	0	0	0	0	0	0.000694287	0	0	0	0	0	0	0	0	0	0	0	0	0	0
ASV1145	0	0	0.00263183	0	0	0	0	0	0	0	0	0	0	0	0	0	0	0	0	0	0	0	0	0	0	0	0	0	0	0	0	0	0	0	0	0	0	0	0	0	0	0	0	0	0	0	0	0	0
ASV1146	0	0	0.00166306	0	0	0	0.000209901	0	0.000984919	0	0	0	0	0	0	0	0	0	0	0	0	0	0	0	0	0	0	0	0	0	0	0	0	0	0	0	0	0	0	0	0	0	0	0	0	0	0	0	0
ASV1147	0	0	0	0	0.00140472	0	0	0	0	0	0.000145316	0	0	0	0	0	0	0	0	0	0	0	0	0	0	0	0	0	0	0	0	0	0	0.000791165	0	0	0.00046824	0	0	0	0	0	0	0	0	0	0	0	0.00012917
ASV1148	0	0	0	0	0	0	0	0	0	0	0	0	0	0	0	0	0	0	0	0	0	0	0	0	0	0	0	0	0	0	0	0	0	0	0	0	0	0	0	0	0	0	0	0	0	0	0	0.00295476	0
ASV1149	0	0	0	0	0	0	0	0	0	0	0	0	0	0	0	0	0	0	0	0	0	0	0	0	0	0	0	0	0	0	0	0	0	0	0	0	0	0	0	0	0	0	0	0	0	0	0	0	0.00130784
ASV1150	0	0	0	0	0	0	0	0	0	0	0	0	0	0	0	0	0	0	0	0	0	8.07e-05	0	0	0	0	0	0	0	0	0	0.000161462	0	0.00025834	0.000242193	0	0	0	0	0	0	0	0	0.000452094	0.000339071	0.000306778	0	0	0
ASV1151	0	0	0	0	0	0	0	0	0	0	0	0	0.000226047	0	0	0	0	0	0	0	0	0	0	0.00166306	0	0	4.84e-05	0	0.000306778	0	0	0	0	0	0.000161462	0	0	0	0	0	0	6.46e-05	0	0.000209901	0	0	0	0	0
ASV1152	0	0	0	0	0	0	0	0	0	0	0	0	0	0	0	0	0	0	0	0	0	0	0	0	0	0	0	0.000888042	0	0	0	0	0	0.00193755	0	0	0	0	0	0	0	0	0	0	0	0	0	0	0
ASV1153	0	0	0	0.000193755	0	0	0.000500533	0.0010495	0	0	0	0	0	0	0	0	0	0	0	0	0	0	0	0	0	0	0	0	0	0	0	0	0.000306778	0	0	0	0	0	0	0	0	0	0	0	0	0.000823457	0	0	0
ASV1154	0	0	0	0	0	0.000452094	0	0	0	0	0.000758872	0	0	0	0	0	0	0	0	0	0	0	0	0	0	0	0	0	0	0	0	0	0	0	0	0	0	0	0	0	0	0	0	0	0	0	0	0	0
ASV1155	0	0	0	0	0	0	0	0	0	0	0	0	0	0	0	0	0	0	0	0	0	0	0	0	0	0	0	0	0	0.000339071	0	0	0	0	0	0	1.61e-05	0	0	0	0	0.00259954	0	0	0	0	0	0	0
ASV1156	0	0	0	0	0	0	0	0	0.00253496	0	0	0	0	0	0	0	0	0	0	0	0	0	0	0	0	0	0	0	0	0	0	0	0	0	0	0	0	0	0	0	0	0	0	0	0.000532825	0	0	0	0
ASV1157	0	0	0	0	0	0	0	0	0	0	0	0	0.000387509	0	0	0.000161462	0	0.000209901	0	0	0	0	0	0	0	0	0	0	0	0.000161462	0	0	0.000355217	0	0	0	0	0	0	0	0.00025834	0	0	0.000209901	0.000209901	0	0	0.000209901	0
ASV1158	0	0	4.84e-05	0	0	9.69e-05	0	0	0	0	0	0	9.69e-05	8.07e-05	9.69e-05	0.00012917	0	4.84e-05	0	0	0	0	0	0	0.000306778	9.69e-05	0	0.000145316	0	0.000161462	0.000145316	0.000113024	4.84e-05	0	0	8.07e-05	0	0.000355217	0	6.46e-05	0	0	9.69e-05	0	0	0	1.61e-05	0	0.000226047
ASV1159	0	0	0.00046824	0	0	0	0.000823457	0	0.0017115	0	0	0	0	0	0	0	0	0	0	0	0	0	0	0	0	0	0	0	0	0	0	0	0	0	0	0	0	0	0	0	0	0	0	0	0	0	0	0	0
ASV1160	0	0	0	0	0	0	0	0	0	0	0	0	0	0	0	0	0	0	0	0	0	0	0	0	0	0	0	0	0	0	0	0	0	0.000339071	0.000290632	0	0	0	0	0	0	0	9.69e-05	0	0.000193755	0.000452094	0	0	0
ASV1161	0	0	0	0	0	0	0	0	0	0	0.00271257	0	0	0	0	0	0	0	0	0	0	0	0	0	0	0	0	0	0	0	0	0	0	0	0	0	0	0	0	0	0	0	0	0	0	0	0	0	0
ASV1162	0	0	0	0	0	0	0	0	0	0	0	0	0	0	0	0	0	0	0	0	0	0	0	0	0	0	0	0	0	0	0	0	0	0	0	0	0	0	0.000274486	0	0	0	0	0	0	0	0	0	0
ASV1163	0	0	0	0	0	0	0	0	0	0	0	0	0	0.00172765	0	0	0	0	0	0	0	0	0	0	0	0.000952627	0	0	0	0	0	0	0	0	0	0	0	0	0	0	0	0	0	0	0	0	0	0	0
ASV1164	0	0	0	0	0	0	0	0	0	0	0	0	0	0	0	0	0	0	0	0	0	0	0	0	0	0	0	0	0	0	0	0	0	0	0	0	0	0	0	0	0	0	0	0	0	0	0	0	0
ASV1165	0	0	0	0	0	0	0	0	0	0	0	0	0	4.84e-05	0	0	0	0.000355217	0	0	0	0.00046824	0	0.000242193	0	0	0	0	0	0	0	0	0	3.23e-05	0	0	0	0	0	0	0	0	0	0.000339071	6.46e-05	0	0	0	0
ASV1166	0	0	0	0	0.000484387	0.0010495	0	0	0	0	0.000435948	0.000742726	0.000209901	0	0	0	0	0	0	0	0	0	0	0	0	0	0	0	0	0	0	0	0	0	0	0	0	0	0	0	0	0	0	0	0	0	0	0	0
ASV1167	0	0.000145316	0	0	0	0	0.000339071	0.000145316	0.000274486	0.000113024	0	0	0	8.07e-05	0	0	0	0.00025834	0	0	0	0	0	0	0	0.000226047	0	0	0	0	0	0.000775019	9.69e-05	9.69e-05	0	0	0	0	0	0	0	0	0	9.69e-05	0	0	0	0	0
ASV1168	0	0	0.0023412	0	0	0	0	0	0.000226047	0	0	0	0	0	0	0	0	0	0	0	0	0	0	0	0	0	0	0	0	0	0	0	0	0	0	0	0	0	0	0	0	0	0	0	0	0	0	0	0
ASV1169	0	0	0	0.00012917	0.00122711	0.000419802	0	0	0	0.000242193	0.000775019	3.23e-05	0	0	0	0	0	0	0	0	0	0	0	0	0	0	0	0	0	0	0	0	0	0	0	0	0	0	0	0	0	0	0	0	0	0	0	0	0
ASV1170	0	0	0	0	0	0	9.69e-05	0	0.00012917	0	0	0	0	0	0	0	0	9.69e-05	0	0	0	0	0.00012917	0.000177608	0	0.00012917	0	0	0	0	0.00175994	0.000161462	0	0	0	0	0	0	0	0	0	0	0	0	0	0	0	0	0
ASV1171	0	0	0	0	0	0	8.07e-05	0	0	0	0	0	0.000145316	0	0	0	0	0.000339071	0	0	0	0	6.46e-05	0.000113024	0.00159848	0	0	0	0	0	0	0	0	0	0.000209901	0	0	0	0	0	0	0	0	0	0	0	0	0	0
ASV1172	0	0	0	0	0	0	0	0	0	0	0	0	0	0	0	0	0	0	0	0	0	0	0	0	0	0	0.000387509	0.000581264	0.000387509	0	0	0	0	0.00138857	0	0	0	0	0	0	0	0	0	0	0	0	0	0	0
ASV1173	0	0	0	0	0	0	0	0	0	0	0	0	0	0	0	0	0	0	0	0	0	0	0	0	0	0	0	0	0	0	0.00269642	0	0	0	0	0	0	0	0	0	0	0	0	0	0	0	0	0	0
ASV1174	0	0	0	0	0.000290632	0	0	0	0	0	0	0	0	0	0	0.00046824	0.000387509	0	0	0	0	0	0	0	0	0	0.000193755	0	0	0	0	0	0	0	0	0	0	0	0	0	0.000500533	0	0	0.000145316	0	0	0.000193755	0	0
ASV1175	0	0	0	0	0	0	0	0	0	0	0.000193755	0	0	0	0	0	0	0	0	0	0	0.00198599	0	0	0	0	0	0	0	0	0	0	0	0.000484387	0	0	0	0	0	6.46e-05	0	0	0	0	0	0	0	0	0
ASV1176	0	0.000242193	0.000113024	0	0	0	0	0	0	0.000661995	0.000113024	0	0	0	0	0	0.000113024	0	0	0.000177608	0	0	0.000290632	8.07e-05	0.000177608	0	0	9.69e-05	0	0	0	0	0	0	8.07e-05	0.000161462	0	0	0	0	0	0	0	0	0	0	0	0	0.000435948
ASV1177	0	0	0	0	0.00151775	0	0	0	0	0	0.00130784	0	0	0	0	0	0	0	0	0	0	0	0	0	0	0	0	0	0	0	0	0	0	0	0	0	0	0	0	0	0	0	0	0	0	0	0	0	0
ASV1178	0	0	0	0	0	0	0	0	0	0	0	0	0.00158233	0	0	0	0.000161462	0	0	0	0	0	0	0	3.23e-05	0	0	0	0	0	0	0	0	0	6.46e-05	6.46e-05	0	0	0.000371363	0	0	0	0	0	0	0	0	8.07e-05	0
ASV1179	0	0	0	0	0	0	0	0	0	0	0	0	0	0	0	0	0	0	0	0	0	0	0	0	0	0	0	0	0	0	0.000403656	0	0	0	0	0	0	0	0.000177608	0	0	0.000306778	0.000678141	0.000193755	0.000113024	0	0	0	0
ASV1180	0	0	0	0	0	0	0	0	0	0	0	0	0	0	0	0	0	0	0	0	0	0	0	0	0	0	0	0	0	0	0	0	0	0	0	0	0	0	0	0	0	0	0	0	0	0	0	0	0.00268027
ASV1181	0	0	0	0	0	0	0	0	0	0	0	0	0.000322924	0	0	0	0	0	0	0	0	0	0	0.00109794	0	0	0	0	0	0	0	0	0	0	0	0	0	0	0	0	0	0	0	0	0	0	0	0	0
ASV1182	0	0	0	0	0	0	0	0	0	0	0	0	0	0	0	0	0	0	0	0	0	0	0	0	0	0	0	0	0	0	0	0	0.00174379	0.000565118	0	0	0	0	0	0	0	0	0	0	0	0.000403656	0	0	0
ASV1183	0	0	0	0	0	0	0	0	0	0	0	0	0	0	0	0	0	0	0	0	0	0	0	0	0	0	0	0	0	0	3.23e-05	0	4.84e-05	0	0	0	0	0	3.23e-05	0	0	0	8.07e-05	0.000177608	0.00208286	0	0	0	0
ASV1184	0	0	0	0	0	0	0	0	0	0	0	0	0	0	0	0	0	0	0	0	0	0	0	0	0	0	0	0	0	0	0	0	0	0	0	0	0	0	0	0	0	0	0	0	0	0	0	0	0
ASV1185	0	0	0	0	0	0	0	0	0	0	0	0	0	0	4.84e-05	0	9.69e-05	0	3.23e-05	0	0	0	0.00261569	0	0	0	0	0	0	0	0	0	0	0	0	0	0	0	0	0	0	0	0	0	0	0	0	0	0
ASV1186	0	0	0	0	0	0	4.84e-05	0.000145316	0.000791165	0	0.00135628	0.000452094	0	0	0	0	0	0	0	0	0	0	0	0	0	0	0	0	0	0	0	0	0	0	0	0	0	0	0	0	0	0	0	0	0	0	0	0	0
ASV1187	0	0	0	0	0	0	0.000177608	0	0	0	0	0	0	0	0	0	0	0	0	0	0	0	0	0	0.000209901	0	0	0	0	0	0	9.69e-05	9.69e-05	6.46e-05	0.000823457	0	0	0	0	0	0	0	0	0.000113024	0.000113024	0.000274486	0	0	0
ASV1188	0	0	0	0	0	0	0	0	0	0	0	0	0	0	0	0	0	0	0	0	0	0	0	0	0	0	0	0	0	0.00237349	0	0	0	0	0	0	0	0	0	0	0	0	0	0	0	0	0	0	0
ASV1189	0	0	0	0	0	0	0	0	0	0	0	0	0.00140472	0	0.000113024	0	3.23e-05	0	0	0	0	0	0	0	0.00106565	0	0	0	0	0	0	0	0	0	0	0	0	0	0	0	0	0	0	0	0	0	0	0	0
ASV1190	0	0	0	0	0	0	0	0	0	0	0	0	0	0	0	0	0	0	0	0	0	0	0	0	0	0	0	0	0	0	0	0	0	0	0	0	0	0	0	0.00264798	0	0	0	0	0	0	0	0	0
ASV1191	0	0	0	0	0	0	0	0	0	0	0	0	0	0	0	0	0.000113024	0	0	0	0	0	0	4.84e-05	0.00012917	0	0	0	0.00248652	0	0	0	0	0.000209901	0	0	0	0	0	0	0	0	0	0	0	0	0	0	0
ASV1192	0	0.000209901	0	0	0.00106565	0	0	0	0	0	0	0	0	0	0	0	0	0	0	0	0	0	0	8.07e-05	0	0	0	0	0	0	0	0	0	0	0	0	0	0	0.000403656	0	0.000484387	0	0	0	0	0	0	0.000419802	0
ASV1193	0	0	0	0	0	0	0	0	0	0	0	0	0	0	0.000113024	0.00132399	8.07e-05	6.46e-05	0	0	0	9.69e-05	0	0	0	0	0.000435948	0	0	0	0	0	0	0	0	0	0	0	0	0	0	0.000355217	0	0	0	0	0	0	0
ASV1194	0	0	0	0	0	0	0	0.00242193	0	0	0	0.000290632	0	0	0	0	0	0	0	0	0	0	0	0	0	0	0	0	0	0	0	0	0	0	0	0	0	0	0	0	0	0	0	0	0	0	0	0	0
ASV1195	0	0	0	0	0	0	0	0	0	0	0	0	0	0	0	0	0	0	0	0	0.00256725	0	0	0	0	0	0	0	0	0	0	0	0	0	0	0	0	0	0	0	0	0	0	0	0	0	0	0	0
ASV1196	0	0	0	0	0	0	0	0	0	0	0	0	0.00127555	0	0	0	0	0	0	0	0	0	0	0	0.00130784	0	0	0	0	0	0	0	0	0	0	0	0	0	0	0	0	0	0	0	0	0	0	0	0
ASV1197	0	0	0	9.69e-05	9.69e-05	0	9.69e-05	9.69e-05	0.000242193	1.61e-05	0	3.23e-05	0.000145316	0.00025834	0	0	0	0	0	0.000371363	0	0	0	0	0	0	6.46e-05	0	0	0	1.61e-05	0	0	0	0	0	0	0	6.46e-05	0.000161462	0	0	0	0	0	0	0	0	0
ASV1198	0	0	0	0	0	0	0	0	0.00012917	0.000355217	0	0	0	0	0	0	0	0	0	0	0.00012917	0	0	0.00187296	0.000113024	0	0	0	0	0	0	0	0	0	0	0	0	0	0	0	0	0	0	0	0	0	0	0	0
ASV1199	0	0	0	0	0	0	0	0	0	0.00208286	0	0	0	0	0	0	0	0	0	0	0	0	0	0	0	0	0	0	0	0	0	0	0	0	0	0	0	0.000548971	0	0	0	0	0	0	0	0	0	0	0
ASV1200	0.00180838	0	0	0	0	0	0	0	0	0	0	0	0	0	0	0	0	0	0	0	0	0	0	0	0	0	0	0	0	0	0.000888042	0	0	0	0	0	0	0	0	0	0	0	0	0	0	0	0	0	0
ASV1201	0	0	0	0	0	0.00111409	0	0	0.00182452	0	0	0	0	0	0	0	0	0	0	0	0	0	0	0	0	0	0	0	0	0	0	0	0	0	0	0	0	0	0	0	0	0	0	0	0	0	0	0	0
ASV1202	0	0	0	0	0	0	0	0	0	0	0	0	0	0	0	0	0	0	0	0	0	0	0	0	0	0	0	0	0	0	0	9.69e-05	0	0	0	0	0	0	0	0	0	0	0.000419802	0.00117867	0	0	0	0	0
ASV1203	0	0.00205057	0	0	0	0	0.000435948	0	0	0	0	0	0	0	0	0	0	0	0	0	0	0	0	0	0	0	0	0	0	0	0	0	0	0	0	0	0	0	0	0	0	0	0	0	0	0	0	0	0
ASV1204	0	0.000274486	6.46e-05	0	0	0	0	0	0	0	0	0	0	0	0	0	0	0.000452094	0	0	0	0	0	0	0	0	0	0	0	0	0	0	0	0	0	0	6.46e-05	0.000161462	0.000193755	0	0.000145316	0.000161462	0	0	8.07e-05	9.69e-05	0	0	0.000371363
ASV1205	0	0	0	0	8.07e-05	6.46e-05	8.07e-05	0	0	0	0.00137243	1.61e-05	0	0	0	0	0	0	0	0	0	0	0	0	0	0	0	0	0	0	0	0	0	0	0	0	0.000532825	0	0	0	0	8.07e-05	0	0	0	0	0	0	0
ASV1206	0	0	0	0	0	0	0	0	0	0	0	0	0.000371363	0	0.000871896	0	0.000387509	0	0	0	0	0.000629703	0	0	0	0	0	0	0	0	0	0	0	0	0	0	0	0	0	0	0	0	0	0	0	0	0	0	0.000339071
ASV1207	0	0	0	0	0.000161462	0.000177608	0	0	0	0	0	0	0	0	0	0	0	0	0	0	0	0	0	0	0	0	0	0	0	0	0	0	0	0	0	0	0	0	0	8.07e-05	0	0.00100107	0	0	0	0	0	0.000387509	0
ASV1208	0	0	0	0	0	0	0.00256725	0	0	0	0	0	0	0	0	0	0	0	0	0	0	0	0	0	0	0	0	0	0	0	0	0	0	0	0	0	0	0	0	0	0	0	0	0	0	0	0	0	0
ASV1209	0	0	0	0	0	0	0	0.00243808	0	0	0	0	0	0	0	0	0	0	0	0	0	0	0	0	0	0	0	0	0	0	0	0	0	0	0	0	0	0	0	0	0	0	0	0	0	0	0	0	0
ASV1210	0	0	0	0	0	0	0	0	0	0	0	0	0	0	0	0	0	0	0	0	0	0	0	0	0	0	0	0	0	0	0	0	0	0	0	0	0	1.61e-05	0.00198599	0	4.84e-05	0	0.000113024	0	9.69e-05	0	0	0	0
ASV1211	0	0	0	0	0	0.00177608	0	0	0	0	0	0.000984919	0	0	0	0	0	0	0	0	0	0	0	0	0	0	0	0	0	0	0	0	0	0	0	0	0	0	0	0	0	0	0	0	0	0	0	0	0
ASV1212	0	0	0	0	0	0	0	0	0	0	0	0	0	0	0	0	0	0	0	0	0	0	0	0	0	0	0	0	0	0	0	0	0	0	0	0	3.23e-05	0	0	0.00111409	0	0	0	0	0	0.000419802	0	0	0
ASV1213	0	0	0	0	0	0	0	0	0	0	0	0	0.000113024	0	0	0	0	0	4.84e-05	0	0	0	0	0	0	0	0	0	0	0	0	0	0	0	0	0	0	0	0	0	0	0	0	0	0	0	9.69e-05	0	0.000629703
ASV1214	0	0	0	6.46e-05	0	0	0	0	0	0	0	0	0	6.46e-05	0	0	0	0	0	0	0	0	0	0	0	0	0	0	0	0	0	0	0	0	0	0	0	0.000791165	0	0	0	0	0	0.00085575	0	0	0	0	0
ASV1215	0	0	0	0.000226047	0	0	0	0	0	0.000532825	0	0	0.000290632	0	0	0.000322924	0	0	0	0	0	0	0	0	0	0	0.000290632	0	0	0	0	0	0.00012917	0	0	0	0	0	0	0	0	0	0	0	0	0	0	0	0.000452094
ASV1216	0	0	0	0	0	0	0	0	0	0	0	0	0	0	0	0.000661995	0	0	0.000419802	0	0	0.000839603	0	0	0	0	0	0	0	0	0	0	0	0	0	0	0	0	0	0	0	0	0	0	0	0	0	0	0
ASV1217	0	0	0	0	0	0	0	0	0	0	0	0	0	0	0	0	0	0	0	0	0	0	0	0	0	0	0	0	0	0	0	0	0	0	0	0	0	0	0.00208286	0	0	0	0	0	0.000113024	0	0	0	0
ASV1218	0	0	0	0	0	0	0	0	0	0	0	0	0	0	0	0	0	0	0	0	0	0	0	0	0	0	0	0	0	0	0	0	0	0	0.000387509	0	0	0	0.000226047	0	0	0	0	0	0.000339071	0	0	0.000387509	0
ASV1219	0	0.00242193	0	0	0	0	0	0	0	0	0	0	0	0	0	0	0	0	0	0	0	0	0	0	0	0	0	0	0	0	0	0	0	0	0	0	0	0	0	0	0	0	0	0	0	0	0	0	0
ASV1220	0	0	0	0	0	0	0	0	0	0	0.00243808	0	0	0	0	0	0	0	0	0	0	0	0	0	0	0	0	0	0	0	0	0	0	0	0	0	0	0	0	0	0	0	0	0	0	0	0	0	0
ASV1221	0	0	0	4.84e-05	0	0	0	0	9.69e-05	0.000274486	0.000678141	0.00146931	0	0	0	0	0	0	0	0	0	0	0	0	0	0	0	0	0	0	0	0	0	0	0	0	0	0	0	0	0	0	0	0	0	0	0	0	0
ASV1222	0.000209901	0	0.000113024	0	0	0	0	0	0.000209901	0	0	0	0	0	0	0.00072658	0	0	0	0	0	0.00025834	0	0	0	0	0	0	0	0.00025834	0	0	0	0.000161462	0	0.000161462	0	0	0	0	0	0	0	0	0	0	0	0	0
ASV1223	0	0	0	0	0	0	0	0	0	0	0	0	0	6.46e-05	0.000226047	0.000226047	0	0	4.84e-05	0	0.00119482	0.00012917	0	0	0	0	0	0	0	0	0	0.000322924	0	0	0	0	0	0	0	0	0	0	0	6.46e-05	0	0	0	0	0
ASV1224	0	0	0	0	0	0	0	0.000500533	0	0	0	0	0	0	0	0	0	0.00134014	0	0	0	0	0	0	0	0	0	0	0	0	0.000242193	0	0	0	0	0	0	0	0.00046824	0	0	0	0	0	0	0	0	0	0
ASV1225	3.23e-05	0.00159848	0	0	0	0	0.000209901	0	0	0	0	0	0	0	0	0	0	0	0	0	0	0	0	0	0	0	0	0	0	8.07e-05	0	0	0	0	0	0.000226047	0	0	0	0	0	0	0	4.84e-05	0	0	0	0.000177608	0
ASV1226	0	0	0	0	0	0	0	0	0	0	0	0	0	0	0	0	0	0	0	0	0	0	0	0	0	0	0	0	0	0	0	6.46e-05	0	0	0	0	0	0.000113024	0	0	0	0	0	0.00206672	4.84e-05	0	0	0	0
ASV1227	0	0	0	0	0	0	0	0	0	0	0	0	0	0	0	0	0	0	0.00219589	0	0	0	0	0	0	0	0	0	0	0	0	0	0	0	0	0	0	0	0	0	0	0	0	0	0	0	0	0	0
ASV1228	0	0	0.00116253	0	0	0	0	0	0	0	0	0	0	0	0	0	0	0.00025834	0	0	0	0	0	0	0	0	0	0	0	0	0	0	8.07e-05	0	0	0	0	0	0	0	0	0	0	0	0.000807311	0	0	0	0
ASV1229	0	0	0	0	0	0	9.69e-05	6.46e-05	0	0	4.84e-05	0	0	0	0	0	0	0	0	0	0	0	0	0	0	0	0	0	0	0	0	0	0	0	0	0.000209901	0	0	8.07e-05	0	0.000403656	0	0	0	0.000242193	0	0.000791165	0	0
ASV1230	0	0	0	0	0	0	0	0	0	0	0	0	0	0	0	0	0	0	0	0	0	0	0	0	0	0	0	0	0	0	0	0	0	0	0	0	0	0	0	0	0	0.000904188	0	0	0	0	0	0.00164691	0
ASV1231	9.69e-05	0	0	0	0	0	0.000209901	0	0	0	0	0	0	0	0	0	0.000161462	0	0	0	0.00025834	0.000274486	0	0	0	0	0	0	0	0	0	0.000290632	0	0	0	0	0	0.000145316	0.000290632	0	0	0	0	0.000290632	0	0	0	0	0
ASV1232	0	0	0	0	0	0.000322924	0.000209901	0	0	0.000274486	0	0	0	0	0	0	0	0	0	0	0	0	0	0	0	0	0	0	0	0	0	0	0	0	0.00153389	0	0	0	0	0	0	0	0	0	0	0.000161462	0	0	0
ASV1233	0	0	0	0	0	0	0	0	0	0	0	0	0	0.00155004	0	0	0	0	0	0	0	0	0	0	0	0.000823457	0	0	0	0	0	0	0	0	0	0	0	0	0	0	0	0	0	0	0	0	0	0	0
ASV1234	0	0	0	0	0	0	0	0	0	0	0	0	0	0	0	0	0	0	0	0	0.000581264	0	0	0	0	0	0	0	0	0	0	0.00187296	0	0	0	0	0	0	0	0	0	0	0	0	0	0	0	0	0
ASV1235	0	0	0	0	0	0	0	0	0	0	0	0	0	0	0	0	0	0	0	0	0	0	0	0	0	0	0	0	0	0	0	0	0	0	0	0	0	0	0	0.00059741	0	0	0	0	0	0	0	0	0
ASV1236	0.000888042	0	0	0	0	0	0	0.000452094	0	0.000581264	0	0	0	0	0	0	0	0	0	0	0	0	0	0	0	0	0	0.000290632	0	0	0	0	0	0	0	0	0	0	0	0	0	0	0	0	0	0	0	0	0
ASV1237	0	0	0	0	0	0	0	0	0	0	0	0	0	0	0	0	0	0	0	0	0	0	0	0	0	0	0	0	0	0	0	0	0	0	0	0	0	0.00230891	0	0	0	0	0	0	0	0	0	0	0
ASV1238	0	0	0	0	0	0	0	0	0	0	0	0	0	0	0	0	0	0	0	0	0.000355217	0	0	0	0	0	0	0	0	0	0	0	0	0	0	0	0	0	0	8.07e-05	0	0	0.000936481	0	0	0	0	0	0
ASV1239	0	0	0	0	0	0	0	0	0	0	0.000565118	0	0	0	0	0	0.000613556	0	4.84e-05	0	0	0	0.0012594	0	0	0	0	0	0	0	0	0	0	0	0	0	0	0	0	0	0	0	0	0	0	0	0	0	0
ASV1240	0.000145316	0	0	0	0.000484387	0.000161462	0	0	0	0	0.000193755	0	0	0	0.000435948	0	0.000322924	0	0	0	0	0	0	0	0	0	0	0	0	0	0	0	0	0	0	0	0	0	0.00012917	0	0	0.000177608	0	0	0.000113024	0	0	0	0
ASV1241	0	0.000161462	0	8.07e-05	0	0	9.69e-05	0	0	9.69e-05	0	0	0	0	0	8.07e-05	0	0	0.000113024	0	0	0	0	0	0.000242193	0	0	0.000161462	0	0	0	0	0	0	0	0	0	0	0.000177608	0	0	0	0	0	0	0.000193755	0	0	0
ASV1242	0	0	0	0	0.000871896	0.000581264	0	0	0	0	0.000710434	0.000355217	0	0	0	0	0	0	0	0	0	0	0	0	0	0	0	0	0	0	0	0	0	0	0	0	0	0	0	0	0	0	0	0	0	0	0	0	0
ASV1243	0	0	0	0	0	0	0	0	0	0	0	0	0	0	0	0	0	0	0	0	0	0	0	0	0	0	0	0	0	0	0	0	0	0	0	0	0	0	0	0	0	0.000355217	0	0	0	0	0	0	0.000177608
ASV1244	0	0	0	4.84e-05	0	0	0	0	0	0	1.61e-05	0	0	0	0	0	0	0	0	0	0.00226047	0	0	0	0	0	0	0	0	0	0	0	0	0	0	0	0	0	0	0	0	0	0	0	0	0	0	0	0
ASV1245	0	0	0	0	9.69e-05	0	4.84e-05	0	0	0.0023412	0	0	0	0	0	0	0	0	0	0	0	0	0	0	0	0	0	0	0	0	0	0	0	0	0	0	0	0	0	0	0	0	0	0	0	0	0	0	0
ASV1246	0	0	0	0	0	0	0	0	0	0	0.000452094	0	0	0	0	0	0	0	0	0	0	0	0	0	0.00124326	0	0	0	0	0	0	0	0	0	0	0	0.000694287	0	0	0	0	0	0	0	0	0	0	0	0
ASV1247	0	0	0	0	0	0	0	0	0	0	0	0	0.000613556	0	0	0	0	0	0	0	0	0	0	0	0.000888042	0	0	0.000758872	0	0	0	0	0	0	0	0	0	0	0	0	4.84e-05	0	0	0	0	0	0	0	0
ASV1248	0	0	0	0	0	0	0	0	0	0	0	0	0	8.07e-05	0	0	0	0	0	0	0.00121097	0	0.00116253	0	0	0	0	0	0	0	0	0	0	0	0	0	0	0	0	0	0	0	0	0	0	0	0	0	0
ASV1249	0	0	0	0	0	0	0	0	0	0	0	0	0	0.000936481	0	0	0	0	0	0.00138857	0	0	0	0	0	0	0	0	0	0	0	0	0	0	0	0	0	0	0	0	0	0	0	0	0	0	0	0	0
ASV1250	0	0	0	0	0	0	0	0	0.00188911	0	0	0	0	0	0	0	0	0	0	0	0	0	0	0	0	0	0	0	0	0	0	0	0	0	0	0.000339071	0	0	0	0	0	0	0	0	0	0	0	0	0
ASV1251	0	0	0	0	0	0	0	8.07e-05	0	0	0	0	0	1.61e-05	0	0	0	0.000226047	0	0	0	3.23e-05	0	0	0.00012917	0	0	0.000387509	0	0.00025834	0	0	0	0	0.000113024	0	0	4.84e-05	6.46e-05	0	0	0	0.000322924	0	0	0	0	0	4.84e-05
ASV1252	0	0	0	0	0	0	0	0	0	0	0	0	0.00103336	0	0	0	0	0	0	0	0	0	0	0	0.0012917	0	0	0	0	0	0	0	0	0	0	0	0	0	0	0	0	0	0	0	0	0	0	0	0
ASV1253	0	0	0	0	0	0	0	0	0.000113024	0	0	0	0	0.000113024	0	3.23e-05	0	0	0	0	3.23e-05	0	0.000113024	0	0	0	0	0	0	0.000355217	4.84e-05	0	0	0.000177608	0	0	0	0	0	0	0	0.00085575	0	0	0	0	0	0	4.84e-05
ASV1254	0	0	0	0	0	0	0	0	0	0	0	0	0	0	0	0.000984919	0	0	0	0	0	0.00124326	0	0	0	0	0	0	0	0	0	0	0	0	0	0	0	0	0	0	0	0	0	0	0	0	0	0	0
ASV1255	0	0	0.0021313	0	0	0	0	0	0	0	0	0	0	0	0	0	0	0	0	0	0	0	0	0	0	0	0	0	0	0	0	0	0	0	0	0	0	0	0	0	0	0	0	0	0	0	0	0	0
ASV1256	0.000355217	0	0.000242193	0	0	0	0	0	0	0	0	0	0	0	0	0	0	0	0	0	0	0	0	0	0	0	0	0	0	0	0	0	0	0	0	0.00146931	0	0	0	0	0	0	0	0	0	0	0	0	0.000226047
ASV1257	0	0	0	0	0	0	0	0.00193755	0	0	0	0	0	0	0	0	0	0	0	0	0	0	0	0	0	0	0	0	0	0	0	0	0	0	0	0	0	0	0	0.000403656	0	0	0	0	0	0	0	0	0
ASV1258	0	0	0	0	0	0	0	0	0	0	0	4.84e-05	0.000145316	8.07e-05	0	0	0	3.23e-05	0	0	0	0.000161462	0	0.000290632	0	0	0	0	0	0	0	0	0	0	0	1.61e-05	3.23e-05	0.000113024	6.46e-05	3.23e-05	0	9.69e-05	0	3.23e-05	0	1.61e-05	0.000161462	0.000193755	0.000274486
ASV1259	0.00113024	0	0	0	0	0	0	0.00124326	0	0	0	0	0	0	0	0	0	0	0	0	0	0	0	0	0	0	0	0	0	0	0	0	0	0	0	0	0	0	0	0	0	0	0	0	0	0	0	0	0
ASV1260	0	0.000322924	0	0	0	0.000274486	0.000193755	0.000161462	0	8.07e-05	0	0.000500533	0	0	0	0	0.000355217	0	0.000226047	0.000113024	0	0	0	0	0	0	0	0	0	0	0	0	0	0	0	0	0	0	0	0	0	0	0	0	0	0	0	0	0
ASV1261	0	0.000403656	0	0.000113024	6.46e-05	0.000242193	8.07e-05	0.000161462	0	9.69e-05	0.000113024	0.00012917	4.84e-05	0	0	0	0	0	0	0	4.84e-05	0	8.07e-05	0	0	0	0	0	0	0	0	0	0	0	0	0.000161462	0	0	0	0	0.000113024	0	0	0.00012917	4.84e-05	0	0	6.46e-05	4.84e-05
ASV1262	0	0	0	0.000113024	0.000209901	0.000355217	0	0.000209901	0.000516679	0.000193755	0.000387509	0.000113024	0	0	0	0	0	0	0.00025834	0	0	0	0	0	0	0	0	0	0	0	0	0	0	0	0	0	0	0	0	0	0	0	0	0	0	0	0	0	0
ASV1263	0	0	0	0	0	0.00253496	0	0	0	0	0	0	0	0	0	0	0	0	0	0	0	0	0	0	0	0	0	0	0	0	0	0	0	0	0	0	0	0	0	0	0	0	0	0	0	0	0	0	0
ASV1264	0	0	0	0	0	0	0	0	0	0	0	0	0	0	0	0	0	0	0	0	0	0	0	0	0	0	0	0	0	0	0	0	0	0	0	0	0	0	0	0	0	0	0	0	0	0	0	0	0
ASV1265	4.84e-05	0	0	0	0	0	0	6.46e-05	0	0	0	0	0	0	0	0	0	0	0	0.00155004	0	0	0	0	0	0	0	0	0	0	0	0	0.00012917	9.69e-05	0	0	0	0	0	0	0	0	0	0	0	0	0	0	0
ASV1266	0	0	0	0	0.00012917	4.84e-05	0	9.69e-05	0	0	0	0.000113024	0	0	0	0	0	0	0	0	0	0	4.84e-05	0	0	0	0	0	0	0.000161462	0	0	8.07e-05	0	0	0	0	0	0	0	0	0.000387509	0	0	0.000209901	0	0	0	0
ASV1267	0	0	0	0	0	0	0	0	0	0	0	0	0	0	0	0	0	0	0	0	0	0	0	0	0	0	0	0	0	0.000791165	0	0	0	0	0	0.000661995	0	0	0	0	0	0	0	0	0	0	0	0	0
ASV1268	0	0	0	0.000419802	0	0	0	0	0	0	0	0	0	0	0	0	0	0	0	0	0.000226047	0.0012917	0	0	0	0	0	0	0	0	0.000322924	0	0	0	0	0	0	0	0	0	0	0	0	0	0	0	0	0	0
ASV1269	0	0	0	0	0	0	0	0.000161462	0	0	0	0	0	0	0	0	0	0	0	0	0.00012917	0	0	0.000371363	0	0.000419802	0	0	0	0	0	0	0	0.000419802	0	0	0	0	0	0	0.000274486	0	0	0	0	0	0	0	0
ASV1270	0	0	0	0.000532825	0.000290632	0	0	0	0	0	0.000371363	0	0	0	0	0	0	0	0.000226047	0	0	0	0	0	0	0	0	0	0	0	0	0.00025834	0	0	0	0	0	0	0	0	0	0	0	0	0	0	0	0	0
ASV1271	0	0	0	0	0	0	0	0	0	0	0	0	0	0	0	0	0	0	0	0	0	0	0	0.00161462	0	0	6.46e-05	0	0	0	0	0	0	0	0	0	0	0	0	0	0	0	0.000387509	0	0	6.46e-05	0	0	0
ASV1272	0	0	0	0	0	0	0	0	0	0	0	0	0	0	0	0	0	0	0.00200213	0	0	0	0	0	0	0	0	0	0	0	0	0	0	0	0	0	0	0	0	0	0	0	0	0	0	0	0	0	0
ASV1273	0	0.000242193	0	0.000403656	0.000678141	0.000242193	0	0	0	0.000209901	0	0	0	0	0	0	0	0	0	0	0	0	0	0	0	0	0	0	0	0	0	0	0	0	0.000500533	0	0	0	0	0	0	0	0	0	0	0	0	0	0
ASV1274	0	0	0	0	0	0	0	0.00012917	0	0	0.000209901	0	0	0	3.23e-05	0.00012917	0	0	0	0	0	0	0	0.000161462	8.07e-05	0	0	0	0	0	6.46e-05	0.00012917	4.84e-05	8.07e-05	4.84e-05	0.000145316	0	8.07e-05	1.61e-05	8.07e-05	0.000193755	9.69e-05	0	0.000113024	3.23e-05	0	0	3.23e-05	0
ASV1275	0	0	0	0	0	0	0	0	0	0	0	0	0.000984919	0	0	0	0	0	0.00106565	0	0	0	0	0	0	0	0	0	0	0	0	0	0	0	0	0	0	0	0	0	0	0	0	0	0	0	0	0	0
ASV1276	0	0	0	0	0	0	0	0	0	0	0	0	0	0	0	0	0	0	0	0	0	0	0	0	0	0	0	0	0	0	0.00230891	0	0	0	0	0	0	0	0	0	0	0	0	0	0	0	0	0	0
ASV1277	0	0	0	0	0	0	0	4.84e-05	0	0	0.00211516	0	0	0	0	0	0	0	0	0	0	0	0	0	0	0	0	0	0	0	0	0	0	0	0	0	0	0	0	0	0	0	0	0	0	0	0	0	0
ASV1278	0	0	0	0	0	0	0	0	0	0	0	0	0	0	0	0	0	0	0	0	0	0	0	0	0	0	0	0	0	0	0	0	0	0	0	0	0	0	0.00012917	0	0	0	0	0	0	0	0	0	0
ASV1279	0	0	0	0	0	0	0	0	0	0	0	0	0	0	0.00132399	0	0	0	0	0	0	0	0	0	0	0	0	0	0	0.000209901	0	0	0	0	0	0	0	0	0	0	0	0.00046824	0	0	0	0	0	0	0
ASV1280	0	0	0	0	0	0	0	0	0	0	0	0	0	0	0	0	0	0	0	0	0	0	0	0	0	0	0	0	0	0	0	0	0	0	0	0	0	0	0	0	0	0	0	0	0	4.84e-05	0.00185681	0	0
ASV1281	0	0	0	0	0	0	0	0	0	0	0	0	0.000775019	0	0	0	0	0	0	0	0	0	0	0	0.000888042	0	0	0	0	0	0	0	0	0	0.000581264	0	0	0	0	0	0	0	0	0	0	0	0	0	0
ASV1282	0	0	0	0	0	0	0	0	0	0	0	0	0	0	0	0	0	0	0	0	0	0	0	0	0	0.000435948	0	0	0	0	0	0.00174379	0	0	0	0	0	0	0	0	0	0	0	0	0	0	0	0	0
ASV1283	0	0	0	0	0	0	0	0	0	0	0	0	0	0	0	0	0	0	0	0	0	0	0	0	0	0	0	0	0	0	0.000274486	0	0	0	0	0	0	0	0	0	0	0	0	0	0	0	0.00177608	0	0
ASV1284	0	0	0	0	0	0	0	0	0	0	0	0	0	0	0	0	0	0	0	0	0	0	0	0	0	0	0	0	0	0.000516679	0	0	0	0	0.000145316	0	0	0	0	0	0	0.000839603	0	0	0	0	0	0	0
ASV1285	0	0.000322924	0	0	0	0	0	0	0.00046824	0	0	0	0	0	0.000775019	0	0	0	0	0	0	0	0	0.000306778	0	0	0	0	0.000452094	0	0	0	0	0	0	0	0	0	0	0	0	0	0	0	0	0	0	0	0
ASV1286	0.000113024	0	0	0	0	0	9.69e-05	0	0	0.00140472	0	0	0	0	0	0	0	0	0	0	0	8.07e-05	0	0	0	0	0	0	0	0	0	0.000226047	0	0	0	0	6.46e-05	0	4.84e-05	0	0	0	0	0.000145316	0	4.84e-05	0	0	0
ASV1287	0	4.84e-05	0	0	0	0	0	0.00163077	0	0	0	0	0	0	0	0	0	0	0	0	0	0	0	0	0	0	0	0.000193755	0	4.84e-05	0	0	0	0.000387509	0	0	0	0	0	0	0	0	0	0	0	0	0	0	0
ASV1288	0	0	0	0.000161462	0	0	0	0	0	0	0	0	0	0	0	0	0	0	0	0	0	0	0	0	0	0	0	0	0	0	0	0.000839603	1.61e-05	3.23e-05	0	0	0	0	0.000742726	0	0	0.000209901	1.61e-05	1.61e-05	0	0	0	0	0
ASV1289	0	0	0	0	0	0	0	6.46e-05	0	0	0	0	3.23e-05	0	0	0	0	0	0	0	0	0	0	0	0	0	0	0	0	0	0	0	0	0	0	0	0	0	0	0	3.23e-05	0	0	0	0	0	0	4.84e-05	0
ASV1290	0	0	0	0	0	0	0	0	0	0	0	0	0	0	0	0	0	0	0	0	0	0	0	0	0	0	0	0	0	0	0	0	0	0	0	0	0.00195369	0	0	0	0	0	0	0	0	4.84e-05	0	0	0.000145316
ASV1291	0.000193755	0	0	0.000113024	0.000209901	0	0	0	0	0	0.000161462	0	0	0	0	0	0	0	0	0	0	0	0	0	0	0	0	0	0	0	0	0	0	0	0.000274486	0	0.000113024	0.000452094	0	0	0	0	0	0	0	0	0	0	0.00046824
ASV1292	0.000193755	0.000242193	0	0.000484387	0.000532825	0.000113024	0.000161462	6.46e-05	0	9.69e-05	0.000161462	0	6.46e-05	0	0	0	0	0	0	0	0	4.84e-05	0	0	0	0	3.23e-05	0	0	0	0	0	0	0	0	0	0	0	0	0	0	0	0	0	0	0	0	0	0
ASV1293	0.000145316	0	0	0	0	0	0	0	0	0	0	0	0	0	0.00217974	0	0	0	0	0	0	0	0	0	0	0	0	0	0	0	0	0	0	0	0	0	0	0	0	0	0	0	0	0	0	0	0	0	0
ASV1294	0	0	0	0	0	0	0	0	0	0	0	0	0.00209901	0	0	0	0	0	0	0	0	0	0	0	0	0	0	0	0	0	0	0	0	0	0	0	0	0	0	0	0	0	0	0	0	0	0	0	0
ASV1295	0	0	0	0	0	0	0	0	0	0	0	0	0	0	0	0	0	0	0	0	0	0	0	0	0	0	0	0	0	0	0	0	0	0	0	0	0	0	0	0	0	0	0	0	0	0	0	0	0
ASV1296	0	0	0	0	0	0	0	0	0	0	0	0	0	0	0	0	0	0	0	0	0	0	0	0	0	0	0	0	0	0	0	0	0	0	0	0	0	0	0	0	0	0	0	0	0	0	0	0	0
ASV1297	0	0	0	0	0	0	0	0	0	0	0	0	0	0	0	0	0	0	0	0	0	0	0	0	0	0	0	0	0	0	0	0	0.000532825	0	0	0	0	0	0	0	0	0	0	0	0	0	0	0	0.000242193
ASV1298	0	0	0	0	0	0	0	0	0	0	0	0	0	0	0	0	0	0	0	0	0	0	0	0	0	0	0	8.07e-05	0	0	0	0	0	0.00209901	0	0	0	0	0	0	0	0	0	0	0	0	0	0	0
ASV1299	0	0	0	0	0	0	0	0	0	0	0	0	0	0	0.00175994	0	0	0	0	0	0	0	0	0	0	0	0.000484387	0	0	0	0	0	0	0	0	0	0	0	0	0	0	0	0	0	0	0	0	0	0
ASV1300	0	0	0	0	0	0	0	0	0	0	0	0	0	0	4.84e-05	0	0	0	0	0.00012917	0	0	0	0	0	0	0.000242193	0	0	0	8.07e-05	0	0	0	0.00025834	0	0	0	1.61e-05	0	4.84e-05	0	1.61e-05	0	0	0	0	0.000177608	0
ASV1301	0	0	0	0	3.23e-05	0	0	0	0	0	0	0	0	8.07e-05	0	0	0	0	0	0.000226047	0	4.84e-05	0.00182452	0	0	0	0	0	0	0	0	0	0	0	0	0	0	0	0	0	0	0	0	0	0	0	0	0	0
ASV1302	0	0.000661995	0	0	0	0.000500533	0	0	0	0	0	0	0	0	0	0	0	0	0	0	0	0	0	0	0	0.000145316	0	0	0	0	0	0	0	0	0	0	0	0	0	0	0	0	0.000161462	0	0.000419802	0.000113024	0	0	0
ASV1303	3.23e-05	0.000242193	9.69e-05	0.000113024	0	6.46e-05	0	0	0.000113024	9.69e-05	0	0.000322924	0.00012917	0.000274486	0	0	0	0	3.23e-05	0	4.84e-05	0	0	0	0	0.00012917	0	0	0	0	6.46e-05	0	0	0	4.84e-05	0	3.23e-05	0	0	0	0	0	0	0	0	0	0	0	0.00012917
ASV1304	0.000419802	0	0	0	0.000242193	0.000226047	0	0	0	0.000274486	0	0.000226047	0	0	0	0	0	0	0	0	0.000306778	0	0	0	0	0	0	0	0.000209901	0	0.000274486	0	0	0	0	0	0	0	0	0	0	0	0	0	0	0	0	0	0
ASV1305	0	0.00109794	0.000452094	0	0	0	0.000532825	0	0	0	0	0	0	0	0	0	0	0	0	0	0	0	0	0	0	0	0	0	0	0	0	0	0	0	0	0	0	0	0	0	0	0	0	0	0	0	0	0	0
ASV1306	0	6.46e-05	0	0	0	6.46e-05	0	0	0	0	1.61e-05	0	0	0	0	0	0	0	0	0	6.46e-05	0	0	3.23e-05	0	0	0	0	9.69e-05	0	0.00025834	0	0.000177608	0	0	0	0	4.84e-05	0	0	0	0.000387509	0	0	0	6.46e-05	0.00025834	0.000274486	0
ASV1307	0	0	0.000516679	0	0	0	0	0	0	0	0	0	0	0	0	0	0	0	0	0	0	0	0	0	0.000500533	0	0	0.00109794	0	0	0	0	0	0	0	0	0	0	0	0	0	0	0	0	0	0	0	0	0
ASV1308	0	0	0	0	0	0.000823457	0	0	0	0	0	0	0	0	0	0	0	0	0	0	0	0	0	0	0	0	0	0	0	0	9.69e-05	0.00119482	0	0	0	0	0	0	6.46e-05	0	0	0	0	0	0	0	0	0	0
ASV1309	0	0	0	0	0	0	0	0	0	0	0	0.00232506	0	0	0	0	0	0	0	0	0	0	0	0	0	0	0	0	0	0	0	0	0	0	0	0	0	0	0	0	0	0	0	0	0	0	0	0	0
ASV1310	0	0	0	0	0	0	0	0	0	0	0	0	0	0	0	0	0	0	0	0	0	0	0	0	0	0	0	0	0	0	0	0	0	0	0	0	0	0.000565118	0	0	0	0	0	0.000678141	0.000775019	0	0	0	0
ASV1311	0	0	0	0	0	0	0	0	0	0	0	0	0	0	0.000678141	0	0	0	0	0	0	0	0	0	0	0	4.84e-05	0	0	0	0	0	9.69e-05	0	0	0	0	0	0	0	0	0	0	0	9.69e-05	0	0	0	0
ASV1312	0	0	0	0	0	0	0	0	0	0	0	0	0	0	0	0	0.000355217	0	0	0	0	0	0	0	0	0	0	0	0	0	0	0	0.000306778	0	0	0	0	0	0	0.000161462	0	0	0	0	0	0	0	0	0
ASV1313	0	0	0	0	0	0	0	0	0	0	0	0	0	0	0	0	0	0	0	0	0	0	0	0	0	0	0	0	0	0	0	0	0	0	3.23e-05	8.07e-05	0	0	0	0	0	0	0.000177608	0	0	0	0	6.46e-05	0
ASV1314	0	0	0	0	0	0	0	0	0	0	0	0	0	0	0	0.00169535	0	0	0	0	0	0.00025834	0	0	0	0	0	0	0	0	0	0	0	0	0	0	0	0	0	0	0	0	0	0	0	0	0	0	0
ASV1315	0	0	0	0	0	0	0	0	0	0	0	0	0	0.0012594	0	0	0	0	0	0	0	0.000371363	0	0	0	0	0	0	0	0	0	0	0	0	0	0	0	0	0	0	0	0	0	0	0	0	0	0	0
ASV1316	0	0	0	0	0	0	0	0	0	0	0	0	0	0	0.000113024	0	0	0	0	0	3.23e-05	0	0	0	0	0	0	0	0	0	0	0	0	0	0	0	0	0	0.000145316	0.000161462	0	0	0	0	0.00109794	0.000435948	0	0	0
ASV1317	0	0	0	0	0	0	0.000484387	0	0	0	0	0	0	0	0	0.00148545	0	0	0	0	0	0	0	0	0	0	0	0	0	0	0	0	0	0	0	0	0	0	0	0	0	0	0	0	0	0	0	0	0
ASV1318	0	0	0	4.84e-05	0	0	0	0	0	0.00205057	9.69e-05	0	0	0	0	0	0	0	0	0	0	0	0	0	0	0	0	0	0	0	0	0	0	0	0	0	0	0	0	0	0	0	0	0	0	0	0	0	0
ASV1319	0	0	0	0	0	0	0	0	0.000871896	0	0	0	0	0	0	0	0	0	0	0	0	0	0	0	0	0	0	0	0	0	0	0	0	0	0	0	0	0	0	0	0	0	0	0	0	0	0.00124326	0	0
ASV1320	0	0	0	0	0	0	0	0	0	0	0	0	0	0	0	0	0	0	0	0	0	0	0	0	0	0	0	0	0	0	0	0	0	0	0	0	0	0	0	0	0	0.00229276	0	0	0	0	0	0	0
ASV1321	0	0	0	0	0	0	0	0	0	0	0	0	0	0	0	0	0.000904188	0.000306778	0	0	0	0	0.000452094	0.00046824	0	3.23e-05	0	0	0	0	0	0	0	0	0	0	0	0	0	0	0	0	0	0	0	0	0	0	0
ASV1322	0	0	0	0	0	0.00012917	0	0	0	0	0	0.000274486	0	0	0	0	0	0	0	0	0	0.00106565	0	0	0	0	0	0	0	0	0	0	0	0.000645849	0	0	0	0	0	0	0	0	0	0	0	1.61e-05	0	0	0
ASV1323	0	0	0	0	0	0	0.000209901	0	0	0	0	0	0	0.00184067	0	0	0	0	0	0	0	0	0	0	0	0	0	0	0	0	0	0	0	0	0	0	0	0	0	0	0	0	0	0	0	0	0	0	0
ASV1324	0	0	0	0	0.000113024	0	0	0.000177608	0.000161462	0.00012917	4.84e-05	0	0	0	0	0	0	0	0	0	0	0	0	0	0	0	0	0	0	0.000113024	0.000145316	0	6.46e-05	0	0.000161462	0.000306778	0.00012917	0	0	0	0.000113024	4.84e-05	8.07e-05	6.46e-05	0	0	0	0.00012917	0
ASV1325	0	0	0	0	0	0	0	0	0	0	0.000694287	0	0	0	0	0	0	0	0	9.69e-05	0	0	0	0	0	0	0	0	0	0	0	0	0	0	0	0	0	0	0	0	0	0	0	0	0.00072658	0	0	0	0
ASV1326	0	0	0	0	0	0	0	0	0	0	0	0	0	0	0	0	0	0	0	0	0	0	0	0	0	0	0	0	0	4.84e-05	0	0	0	0	0	0	0.000532825	0	0	0	0	0.00159848	0	0	0	0	0	0	0
ASV1327	0	0	0	0	0	0	0	0	0	0	0	0	0.000807311	0	0	0	0	0	0	0	0	0	0	0	0.0012917	0	0	0	0	0	0	0	0	0	0	0	0	0	0	0	0	0	0	0	0	0	0	0	0
ASV1328	0	0	0	0	0	0.000177608	0	0	0	4.84e-05	0	0	0	0	0	0	0	0	0	0	0	0	0	0	0	6.46e-05	0	0	0	4.84e-05	0	0	0.000306778	0.000145316	0	8.07e-05	0	0	0.000193755	0	0	0.000177608	0	0	0.000242193	8.07e-05	0	0.000209901	8.07e-05
ASV1329	0	0	0	0	0	0	0	0	0	0	0	0	0	0	0	0	0	0	0	0	0	0	0	0	0	0	0	0	0	0	0	0	0	0	0.000791165	0	0	0	0	0	0	0	0	0	0.00117867	0	0	0	0
ASV1330	0	0.00195369	4.84e-05	0	0	0	0	0	0	0	0	0	0	0	0	0	0	0	0	0	0	0	0	0	0	0	0	0	0	0	0	0	0	0	0	0	0	0	0	0	0	0	0	0	0	0	0	0	0
ASV1331	0	0	0	0	0	0	0	0	0	0	0	0	0.000290632	0	0	0	0	0	0	0	0	0	0	0	8.07e-05	0	0	0	0	0	0	0	0	4.84e-05	0	0	0	0	0	0	0.000565118	0	0	0	0	0	0	0	0
ASV1332	0	0	0	0	0	0	0	0	0	0	0	0	0	0	0	0	0	0	0	0	0	0.000419802	0	0	0	0	0	0	0	0	0	0	0	0	0	0	0	0	0	0	0	0	0	0	0	0.000145316	0	0.000548971	0
ASV1333	0	0	0	0	0	0	0	0	0	0	0	0	0.000968773	0	0	4.84e-05	0	0	0	0	0	0	0	0	0.000936481	0	0	8.07e-05	0	0	0	0	0	0	0	0	0	0	0	0	0	0	0	0	0	0	0	0	0
ASV1334	0	0	0.000694287	0	0	0	0.000306778	0	0.00113024	0	0	0	0	0	0	0	0	0	0	0	0	0	0	0	0	0	0	0	0	0	0	0	0	0	0	0	0	0	0	0	0	0	0	0	0	0	0	0	0
ASV1335	0	0	0	0.000758872	0	0	0	0	0	0.000565118	0	0.000678141	0	0	0	0	0	0	0	0	0	0	0	0	0	0	0	0	0	0	0	0	0	0	0	0	0	0	0	0	0	0	0	0	0	0	0	0	0
ASV1336	0	0	0	0	0	0	0	0	0	0.00214745	0	0	0	0	0	0	0	0	0	0	0	0	0	0	0	0	0	0	0	0	0	0	0	0	0	0	0	0	0	0	0	0	0	0	0	0	0	0	0
ASV1337	0	0	0	0	0	0	0	0	0	0	0	0	0	0	0	0	0	0	0	0	0	0	0.000904188	0	0	0	0	0	0	0	0	0	0	0	0	0	0	0	0	0	0	0	0	0.000661995	0	0	0.00046824	0	0
ASV1338	0	0	0	0	0	0	0	0	0	0	0	0	0	0	0	0	0	0	0	0.000209901	0	0.000952627	0	0	0	0	0	0	0	0	0	0.000871896	0	0	0	0	0	0	0	0	0	0	0	0	0	0	0	0	0
ASV1339	0	0.000500533	0	0	0	0	0	0	0	0.000145316	0	0	0.000209901	0	0	0	0	0	0.000113024	0	0	0	0	0	0	0	0	0	0	0	0	0	0.00059741	0	0.000193755	0	0	0	0	0	0	0	0	0	0	0	0	0	0.000161462
ASV1340	0	0	0	0	0	0	0.00203442	0	0	0	0	0	0	0	0	0	0	0	0	0	0	0	0	0	0	0	0	0	0	0	0	0	0	0	0	0	0	0	0	0	0	0	0	0	0	0	0	0	0
ASV1341	0	0	0	0	0	0	0	0	0	0	0	0	0	0.000435948	0	0	1.61e-05	0	0	0.00119482	0	0	0.00025834	0	0	0	0	0	0	0	0	0	0	0	0	0	0	0	0	0	0	0	0	0	0	0	0	0	0
ASV1342	0	0	0	0	0	0	0	0	0	0	0	0	0	0	0	0	0	0	0	0	0	0	0	0	0.00109794	0	0	0	0	0	0.000968773	0	0	0	0	0	0	0	0	0	0	0	0	0	0	0	0	0	0
ASV1343	0	3.23e-05	0	0	0	0	0.000161462	4.84e-05	0.000161462	4.84e-05	0	0	0	0.000322924	0	0	0.000177608	8.07e-05	0	0	0	0	0	0	0	0	0	0	0	0.000145316	0	0	0	0	0	0.00012917	0	0	4.84e-05	0	0.000322924	8.07e-05	0	0	0	0	0	0	0
ASV1344	0	0	0	0	0	0	0	0	0	0	0	0	0	0.000355217	0	0	0	1.61e-05	0	0	0	0	0	0	0	0	0.0015016	0	0	0	0	0	0	0	0	0	0	0	0	0	0	0	0	0	0	0	0	0	0
ASV1345	0	0	0	0	0	0	0	0	0	0	0	0	0	0	0	0	0	0	0	0	0	0	0	0	0	0	0	0.00142087	0	0	0	0	0	0.000548971	0	0	0	0	0	0	0	0	0	0	0	0	0	0	0
ASV1346	0	0	0	0	0	0	0	0	0	0	0	0	0	0	0.000742726	0	0	0	0.000113024	0	0.000984919	0	0	0	0	0	0.000177608	0	0	0	0	0	0	0	0	0	0	0	0	0	0	0	0	0	0	0	0	0	0
ASV1347	0	0	0	0	0	0	0	0	0	0	0	0	0	0	0	0	0	0	0	0	0	0	0	0	0	0	0	0.00193755	0	0	0	0	0	0	0	0	0	0	0	0	0	0	0	0	0	0	0	0	0
ASV1348	0	0	0	0	0	0	0	0	0	0	0	0	0	0	0	0	0	0	0	0	0	0	0	0	0	0	0	0	0	0	0	0	0	0	0	0	0	0	0	0	0	0	0	0	0	0	0.00182452	0	0
ASV1349	0	0	0	0	0	0	0	0	0	0	0	0	0	4.84e-05	0	0	0	0	0	0	0	0	0	0	0	0	0	0	0	0	0	0	0	0	0.00134014	0	0	0	0	0	0	0	0	0	0	8.07e-05	0	0	0
ASV1350	0	3.23e-05	0	0	0	0	0	0.00203442	0	0	0	0	0	0	0	0	0	0	0	0	0	0	0	0	0	0	0	0	0	0	0	0	0	0	0	0	0	0	0	0	0	0	0	0	0	0	0	0	0
ASV1351	0	0	0	0.000419802	0.000516679	0	0	0	0	0	0.000403656	0	0	0	0	0	0	0	0	0	0	0	0	0	0	0	0	0	0	0	0	0	0	0	0	0	0	0	0	0	0	0	0	0	0.00059741	0	0	0	0
ASV1352	0	0	0	0	0	3.23e-05	0.000629703	0.000952627	9.69e-05	0.000322924	0	0	0	0	0	0	0	0	0	0	0	0	0	0	0	0	0	0	0	0	0	0	0	0	0	0	0	0	0	0	0	0	0	0	0	0	0	0	0
ASV1353	0	0	0	0	0	0	0	0	0	0	0	0	0	0	0	0	0	0	0	0	0	0	0	0	0	0	0	0	0	0	0	0	0	0	0	0	0	0.00190525	0	0	0	0	0	0	0	0	0	0	0
ASV1354	0	0	0	0	0	0	0	0	0	0	0	0	0	0.00127555	0	0	0	0	0	0.000678141	0	0	0	0	0	0	0	0	0	0	0	0	0	0	0	0	0	0	0	0	0	0	0	0	0	0	0	0	0
ASV1355	0	0	0	0	0	0	0	0	0	0	0	0	0	0	0	0	0	0	0	0	0	0	0	0	0	0	0	0	0	0	0	0	0	0	0	0.00193755	0	0	0	0	0	0	0	0	0	0	0	0	0
ASV1356	0	0	0	0	0	0	0	0	0	0	0	0	0	0	0	0	0	0	0	0	0	0	0	0	0	0	0	0	0	0	0	0	0	0	0	0	0	0	0	0	0	0	0	0	0	0	0	0	0
ASV1357	0	0	0	0	0	0	0	0	0	0	0	0	0	0	0	0	0.000452094	0.00012917	0	0	0	6.46e-05	0	0	0	0	9.69e-05	0	0	3.23e-05	0	0.000145316	0.000161462	0.000274486	0.000145316	0	0	0	0	0	0	0	0	9.69e-05	0	0	0	0	0
ASV1358	0	0	0	0	0	0	0	0	0	0	0	0	0.00100107	0	0	0	0	0	0	0	0	0	0	0	0.000920335	0	0	0	0	0	0	0	0	0	0	0	0	0	0	0	0	0	0	0	0	0	0	0	0
ASV1359	0	0	0.000403656	0	0	0	0	0.000403656	0	0	0	0	0	0	0	0	0	0	0	0	0	0	0	0	0	0	0	0	0	0	0	0	0	0	0	0	0	0.000452094	0	0	0	0	0	0.000613556	0	0	0	0	0
ASV1360	0	0	0	0	0	0	0	0	0	0	0	0.00209901	0	0	0	0	0	0	0	0	0	0	0	0	0	0	0	0	0	0	0	0	0	0	0	0	0	0	0	0	0	0	0	0	0	0	0	0	0
ASV1361	0	0	0	0	0	0	0	0	0	0	0	0	0	0	0	0	0	0	0	0	0	0	0	0	0	0	0	0	0	0.000339071	0	0.000452094	0	0	0	0	0	0	0	0	0	0.00059741	0	0	0	0	0	0	0
ASV1362	0	0	0	0	0	0	0	0	0	0	0	0	0.000581264	0	0	0	0	0	6.46e-05	0	4.84e-05	0.000193755	0	0	0.000694287	0	0	0	0	0.000322924	0	0	0	0	0	0	0	0	0	0	0	0	0	0	0	0	0	0	0
ASV1363	0	0	0	0	0	0	0	0	0	0	0	0	0	0	0	0.000920335	0	0	0	0	0	0.000565118	0	0	0	0	0	0	0	0	0	0	0	0	0	0	0	0	0	0	0.000419802	0	0	0	0	0	0	0	0
ASV1364	0	0	0	0	0	0	0	0	0	0	0	0	0	0	9.69e-05	0	0	0	0	0	6.46e-05	0	0	0	0	0	0	0	0.000242193	0	0	0	0	0	0	0.000242193	0	0	0	0	0.000177608	0	0	0.000387509	0.000419802	0	0.000274486	0	0
ASV1365	0.00201828	0	0	0	0	0	0	0	0	0	0	0	0	0	0	0	0	0	0	0	0	0	0	0	0	0	0	0	0	0	0	0	0	0	0	0	0	0	0	0	0	0	0	0	0	0	0	0	0
ASV1366	0	0	0	0	0.000145316	0	0	0	0	0	0	0	0	0	0	6.46e-05	0	0.000952627	0	0	0	0	0	0	0	0	4.84e-05	0	0	0	8.07e-05	0	0	0.00046824	0	0	0	0	0	0	0	0.000145316	0	0	0	0	0	0	0
ASV1367	0	0	0	0	0	0	0	0	0	0	0	0	0	0	0	0	0	0	0	0	0	0	0	0	0	0	0	0	0	0	0	0	0	0	0.0010495	0	0	0	0	0	0.000548971	0	0	0	0	0	0	0	0
ASV1368	0	0	0	0	0	0	0	0	0	0	0	0	0	0	0	0	0	0	0	0	0	0	0	0.000209901	0	0	0	0	0	0.00151775	0	0	0	0	0	0	0	0	0	0	0	0	0	0	0	0	0	0	0
ASV1369	0	0	0	0	0	0	0	0	0	0	0	0	0	0	0	0	0	0	0	0	0	0	0	0	0	0	0	0.00190525	0	0	0	0	0	0	0	0	0	0	0	0	0	0	0	0	0	0	0	0	0
ASV1370	0	0	0	0	0	0	0	0	0	0	0	0	0	0	0	0	6.46e-05	0.000871896	0	0	0	0	0	0.000355217	0	0	0	0	0	0	0.000145316	0	0	0	0	0	0	1.61e-05	0.000193755	0	0	0	0	0	0	0	0	0	0
ASV1371	0	0	0	0	0	0	0	0	0	0	0	0	0	0	0.00025834	0	0	0	0.000419802	0	0	0	0	0	0	0	0	0	0	0	0	0	0.000209901	0	0	0	0	0	0	0	0	0	0	0	9.69e-05	0	0	0	0
ASV1372	0	0	0	0	0	0	0	0	0	0	0	0	0	0	0	0	0	0	0	0	0	0	0	0	0	0	0	0	0	0	0	0	0	0	0	0	0	0	0	0	0	0	0	0	0	0	0	0.00196984	0
ASV1373	0	0	0	0	0	0	0	0	0	0	0	0	0	0	0	0	0	0	0	0	0	0	0	0	0	0	0	0	0	0	3.23e-05	0	0	0.00188911	0	0	0	0	0	0	0	0	0	0	0	0	0	0	0
ASV1374	0	0	0	0	0	0	0	0	0	0	0	0	0	0	0	0	0	0	0	0	0	0	0	0	0	0	0	0	0	0	0	0	0	0	0	0	0	0	0	0	0	0	0	0	0	0	0	0	0.00190525
ASV1375	0	0	0	0	0	0	0	0	0	0	0	0	0	0	0	0	0	0	0	0	0	0	0	0	0	0	0	0	0	0	0	0	0	0	0	0	0	0	0.000274486	0	0	0	0	0.000113024	0	0	0	0.000936481	0
ASV1376	0	0	0	0	0	0	0	0	0	0	0	0	0	0	0	0	0.000871896	0	0	0	0	0	0.00113024	0	0	0	0	0	0	0	0	0	0	0	0	0	0	0	0	0	0	0	0	0	0	0	0	0	0
ASV1377	0	0	0	0	0	0	0	0	0	0	0	0	0	0	0.00203442	0	0	0	0	0	0	0	0	0	0	0	0	0	0	0	0	0	0	0	0	0	0	0	0	0	0	0	0	0	0	0	0	0	0
ASV1378	0	0	0	0	0	0	0	0	0	0	0	0	0	0	0	0	0	0	0	0	0	0	0	0	0	0	0	0	0	0.00169535	0	0	0	0	0	0	0	0	0	0	0	0	0	0	0	0	0	0	0
ASV1379	0	0	0	0	0	0	0	0	0	0	0	0	0	0	0.000161462	0	0	0	0	0	0	0	0	0	6.46e-05	0	0	0.000161462	8.07e-05	8.07e-05	0	0	0	6.46e-05	0	6.46e-05	0	0	0.000371363	8.07e-05	0	0.000113024	0.000145316	0	0.000403656	4.84e-05	0	0	0
ASV1380	0	0	0	0	0	0.000242193	0	0	0	0.000242193	0.000613556	0	0	0	0	0.000516679	0	0	0	0	0	0	0	0	0	0	0	0	0	0	0	0	0	0	0.000161462	0	6.46e-05	0	0	0	0	0	0	0	0	0	0	0	0
ASV1381	0	0	0	0	0	0	0	0	0	0	0	0	0	0	0	0	0	0	0	0	0	0	0	0	0	0	0	0	0	0	0	0	0	0	0	0	0	0	0	0	0	0	0	0	0	0	0	0	0
ASV1382	0	0	0	0	0.00195369	0	0	0	0	0	4.84e-05	0	0	0	0	0	0	0	0	0	0	0	0	0	0	0	0	0	0	0	0	0	0	0	0	0	0	0	0	0	0	0	0	0	0	0	0	0	0
ASV1383	0	0	0	0	0	0	0	0	0	0	0	0	0	0	0	0	0	0	0	0	0	0	0	0	0	0	0	0	0	0	0	0	0	0	0	0	0	0	0	0	0.000306778	0	0.000758872	0	0	0	0.000209901	0	0
ASV1384	0	0	0	0	0	0	0	0	0	0	0	0	0	0	0	0	0	0	0	0	0	0	0	0	0	0	0	0	0	0	0	0	0	0	0	0	0	0	0	0	0	0	0.00185681	0	0	0	0	0	0
ASV1385	0	0	0	0	0	0	0	0	0	0	0	0	0	0	0	0	0	0	0	0	0	0.00012917	0.000484387	0	0	0	0	0	0	0	0	3.23e-05	0.000193755	0	0	0	0	0	0	0	0	0	0	8.07e-05	0.000306778	0	0	0	0
ASV1386	0	0	0	0	0	0	0	0.00174379	0	0	0.000161462	0	0	0	0	0	0	0	0	0	0	0	0	0	0	0	0	0	0	0	0	0	0	0	0	0	0	0	0	0	0	0	0	0	0	0	0	0	0
ASV1387	0	0	0.000355217	0	0	0	0.000452094	0	0.00114638	0	0	0	0	0	0	0	0	0	0	0	0	0	0	0	0	0	0	0	0	0	0	0	0	0	0	0	0	0	0	0	0	0	0	0	0	0	0	0	0
ASV1388	0	0	0.00085575	0	0	0	0	0	0.0010495	0	0	0	0	0	0	0	0	0	0	0	0	0	0	0	0	0	0	0	0	0	0	0	0	0	0	0	0	0	0	0	0	0	0	0	0	0	0	0	0
ASV1389	0	0	0	0	0	0	0.000871896	0.00100107	0	0	0	0	0	0	0	0	0	0	0	0	0	0	0	0	0	0	0	0	0	0	0	0	0	0	0	0	0	0	0	0	0	0	0	0	0	0	0	0	0
ASV1390	0	0	0	0	0	0	0	0	0	0	0	0	0	0	0	0	0	0	0	0	0	0	0	0	0	0	0	0.000322924	0	0	0	0	0	0.000322924	0	0	6.46e-05	0	0.000548971	0	4.84e-05	0	0	0	0	0	4.84e-05	0	0
ASV1391	0	0	0	0	0	0	0	0	0	0	0	0	0	0	0	0	0	0	0	0	0	0	0	0	0	0	0	0	0	0	0	0	0.000984919	0	0	0	0	0	0	0	0.00072658	0	0	0	0	0	0	0	0.000209901
ASV1392	0	0	0	0	0	0	0	0	0	0	0	0	0	0.000888042	0	0	0	0.000484387	0	0	0	0	0	0	0	0.00025834	0	0	0	0	0	0	0	0	0	0	0	0	0	0	0.000274486	0	0	0	0	0	0	0	0
ASV1393	0	0	0	0	0	0	0	0	0	0	0	0	0	0	0	0.00167921	0	0	0	0	0	0	0	0	0	0	0	0	0	0	0	0	0	0	0	0	0	0	0	0	0	0	0	0	0	0	0	0	0
ASV1394	0	0	0	0	0	0	0	0	0	0	0	0	0	0	0	0	0	0	0	0	0	0	0	0	0	0	0	0	0	0	0	0	0	0	0	0	0	0	0	0	0	0	0	0	0	0	0	0	0
ASV1395	0	0	0	0.00130784	0	0.000145316	0	0	0	0	0	0	0	9.69e-05	0	0	0	0	0	0	0	0	0	0	0	0	0	0	0	0	0	0	0	0	0	0	0	0	0	0	0	0	0	0	0	0	0	0	0
ASV1396	0	0	0	0	0	0	0	0	0	0.000161462	0	0	0	0	0	0	0	0	0	0	0	0	0	0	0	0	0	0	0	0	0	0	0	0	0	0	0	0	0.00148545	0	0	0	0	0	0	0	0	8.07e-05	0
ASV1397	0	0	0	0	0	0	0	0	0	0	0	0	0	0	0	0	0	0	0	0	0	0	0	0	0	0	0	0	0	0	0	0	0	0	0	0	0	0	0	0	0	0.00196984	0	0	0	0	0	0	0
ASV1398	0	0	0	0	0	0	0	0	0	0	0	0	0	0.00114638	0	0	0	0	0	0	0	0	0.000193755	0	0	0	0	0	0	0	0	0	0	0	0	0	0	0	0	0	0	0	0	0	0	0	0	0	0
ASV1399	0	0	0	0	0	0	0	0.00187296	0	0	0	0	0	0	0	0	0	0	0	0	0	0	0	0	0	0	0	0	0	0	0	0	0	0	0	0	0	0	0	0	0	0	0	0	0	0	0	0	0
ASV1400	0	0	0	0	0.000371363	3.23e-05	0	0	0	0	0	0	0	0	0	0	0	0	0	0	0	0	0	0	0	0	0	0	0	0	0.00148545	0	0	0	0	0	0	0	0	0	0	0	0	0	0	0	0	0	0
ASV1401	0.00025834	0	0	0	0	0	0.000242193	0	0	0	0	4.84e-05	0	0	0	0	0	0	0	4.84e-05	0	0	8.07e-05	0	0	0	0	0	0	0	0	0.000161462	0	0	0	0	0	0	0	0	0.000209901	0	0	0	0	0	8.07e-05	0.000678141	0
ASV1402	0	0	0	0	0	0	0	9.69e-05	0	0	0	0	4.84e-05	0	0	0	0	0	0	0	0	0	0	0	0	0	0	0	0	0	0	0	0	0	0	0	0	0	4.84e-05	0.000274486	0	0	9.69e-05	6.46e-05	0	0	0	0	0.000274486
ASV1403	0	0	0	0	0	0	0	0	0	0	0	0	0	0	0	0	0	0	0	0	0	0	0	0	0	0	0	0	0	0	0	0	0	0	0	0	4.84e-05	0	0.00145316	0	0	0	0	0	0	0	0	0	0
ASV1404	0	0	0	0	0	0	0	0	0	0	0	0	0	0	0	0	0	0	0	0	0	0	0	0	0	0	0	0	0	0	0	0	0	0	0	0	0	0	0.00169535	0	0	0	0	0	0	0	0	0	0
ASV1405	0	0	0	0	0	0	0	0	0	0	0	0	0	0	0	0	0	0	0	0	0	0	0	0	0	0.000387509	0	0	0	0.000775019	0	0	0	0	0	0	0	0	0	0	0	0	0	0	0	0	0	0	0
ASV1406	0	0	0	0	0	0.000145316	0	0.000161462	0	0	0.00117867	0	0	0	0	0	0	0	0	0	0	0	0	0	0	0.000274486	0	0	0	0	0	0	0	0	0	0	0	0	0	0	0	0	0	0	0	0	0	0	0
ASV1407	0	0	0	0	0	0	0	0	0	0	0	0	0	0	0	0	0	0	0	0	0	0	0	0	0	0	0	0	0	0	0	0	0	0.00164691	0	0	0	0	0	0	0	0	0	0	0	0.000161462	0	0	0
ASV1408	0	0	0	0	0	0	0	0	0	0	0	0	0	0	0	0	0	0	0	0	0	0.000193755	0.00164691	0	0	0	0	0	0	0	0	0	0	0	0	0	0	0	0	0	0	0	0	0	0	0	0	0	0
ASV1409	0	0	0	0	0	0	0	0	0	0	0	0	0	0	0	0	0	0	0	6.46e-05	6.46e-05	0	0.00174379	0	0	0	0	0	0	0	0	0	0	0	0	0	0	0	0	0	0	0	0	0	0	0	0	0	0
ASV1410	0	0	0	0	0	0	0	0	0	0.000775019	0	0	0	0.000791165	0	0	0	0.000306778	0	0	0	0	0	0	0	0	0	0	0	0	0	0	0	0	0	0	0	0	0	0	0	0	0	0	0	0	0	0	0
ASV1411	0	0	0	0	0	3.23e-05	6.46e-05	0	0	0	3.23e-05	0	0	0	0	0	0	0	4.84e-05	0	0.00012917	1.61e-05	0	6.46e-05	3.23e-05	0	0	0	0	0	0	0	0	0.000242193	0	0	4.84e-05	0	1.61e-05	3.23e-05	0	0	6.46e-05	0.000161462	0	0.000113024	0	3.23e-05	0
ASV1412	0	0	0	0	0	0	0	0	0	0	0	0	0	0	0	0	0	0	0	0	0	0	0	0	0	0	0	0	0	0	0	0	0	0	0	0	0	0	0	0	0	0	0	0	0.00153389	0	0	0	0
ASV1413	0	0.00130784	0	0	0	0	3.23e-05	0	0	0	0	0	0	0	0	0	0	0	0	0	0	0	0	0	0	0	0	0	0	0	0	0	0	0	0	0	1.61e-05	0	0.000322924	0	0	0	0	0	0	0	0	0	0
ASV1414	0	0	0	3.23e-05	0	0	0	0	0	0	0	0	0	0	0	0	0	0	0	0	0	0	0	0	0	0	9.69e-05	0	0	0	6.46e-05	0	0.000871896	0	0.000565118	0	0	0	0	0	0	0	0	0	0	0	0	0	0
ASV1415	0	0	0	0	0.00188911	0	0	0	0	0	0	0	0	0	0	0	0	0	0	0	0	0	0	0	0	0	0	0	0	0	0	0	0	0	0	0	0	0	0	0	0	0	0	0	0	0	0	0	0
ASV1416	0	0	0	0	0	0	0	0	0.000306778	0	0	0	0	0	0	0	0	0	0.00127555	0	0	0	0	0	0	0	0	0	8.07e-05	0	0	0	0	0	0	0	0	0	0	0	0	0	0	0	0	0	0	0	0
ASV1417	0	0	0	0	0	0	0	0	0	0	0	0	0	0	0	0	0.000161462	0.000290632	0	0	0	0	8.07e-05	0	0	0	0	0	4.84e-05	0	0	0.000145316	0	0	0	0	0	0	0	0	0	0.000290632	0	0	0	0	0	3.23e-05	0
ASV1418	0	0	0	0	0	0	0	0	0	0	0	0	0	0.00142087	0	0	0	0	0	0	8.07e-05	0	0	0	0	0	0	0	0	0	0	0.000322924	0	0	0	0	0	0	0	0	0	0	0	0	0	0	0	0	0
ASV1419	0	0	0	0	0	0	0	0	0	0	0	0	0	0	0	0	0	0	0.000161462	8.07e-05	0.000355217	0.00059741	0.000145316	0	0.000387509	0	0	0	0	0	0	0	0	0	0	0	0	0	0	0	0	0	0	0	0	0	0	0	0
ASV1420	0	0	0	0	0	0	0	0	0	0	0	0	0	0	0	0	0	0	0	0	0	0	0	0	0	0	0	0	0	0	0	0	0	0	0	0	0	0	0	0	0	0	0	0	0	0	0	0	0
ASV1421	0	0	0	0	0	0	0	0	0	0	0	0	0	0	0.00187296	0	0	0	0	0	0	0	0	0	0	0	0	0	0	0	0	0	0	0	0	0	0	0	0	0	0	0	0	0	0	0	0	0	0
ASV1422	0.000661995	0.000565118	0	0	0	0.000145316	0.000371363	6.46e-05	0	0	0	0	0	0	0	0	0	0	0	0	0	0	0	0	0	0	0	0	0	0	0	0	0	0	0	0	0	0	0	0	0	0	0	0	0	0	0	0	0
ASV1423	0	0	0	0	0	0	0	0	0	0	0	0	0	0	0	0	0	0	0	0	0	0	0	0	0	0	0	0	0	0	0	0	0	0.000387509	0.000193755	0	0	0	0	0	0	0	0	0	0	0.00046824	0	0	0
ASV1424	0	0	0	0	0	0	4.84e-05	0	0	0	0.000387509	0	0	0	0	0	0	0	0	0.00012917	0.000145316	6.46e-05	0	0	0	0	0	0	0	0	0	0	0	0	0.0010495	0	0	0	0	0	0	0	0	0	0	0	0	0	0
ASV1425	0	0	0	0	0	0	0	0	0	0	0	0	0	0	8.07e-05	0	0	0	0	0	0	0	0	0.000306778	0	0	0	0	0	0	0	0	0	0	0	0.000661995	0	0.000242193	0	0	0	0.000274486	0	0	0.000145316	0	0	0	0
ASV1426	0	0	0	0	0	0	0	0	0	0	0	0	0	0	0	0.00106565	0	0	0	0	0	0.000565118	0	0	0	0	0	0	0	0	0	0	0	0	0	0	0	0	0	0	0	0	0	0	0	0	0	0	0
ASV1427	0	0	0	0	0	0	0	0	0	0	0	0	0	0	0	0	0	0	0.00155004	0	0	0	0	0	0	0	0	0	0	0	0	0	0	0	0	0	0	0	0	0	0	0	0	0	0	0	0	0	0
ASV1428	0	0.000355217	0	9.69e-05	0	0	0.000387509	0	0	0	0	0	8.07e-05	0	0	0	0	0	1.61e-05	0	3.23e-05	0.000371363	0	0	0	0	0	0	0.000177608	0	9.69e-05	0	0	0	0	0	0	0	0	0	0	0	0	0	0	0	0	0	0
ASV1429	0	0	0	0.000920335	0.000613556	0	0	0.00012917	0	0	0	0	0	0	0	0	0	0	0	0	0	0	0	0	0	0	0	0	0	0	0	0	0	0	0	0	0	0	0	0	0	0	0	0	0	0	0	0	0
ASV1430	0	0	0	0	0	0	0	0	0.00137243	0	0	0	0	0	0.000355217	0	0	0	0	0	0.000226047	0	0	0	0	0	0	0	0	0	0	0	0	0	0	0	0	0	0	0	0	0	0	0	0	0	0	0	0
ASV1431	0	0	0	0	0	0	0	0	0	9.69e-05	0	0	0	0	0	0	0	0	0.000193755	0	0	0	0	0	0	0	0	0	0	0	0	0	0	0	0	1.61e-05	0	0	0	0	0	0	0.00025834	0.000387509	0	0	0	0.000322924	0
ASV1432	0	0	0.00127555	0	0	0	0	0	0	0	0.000322924	0	0	0	0	0	0	0	0	0	0	0	0	0	0	0	0	0	0	0	0	0	0	0	0	0	0	0	0	0	0	0	0	0	0	0	0	0	0
ASV1433	0	0.000290632	0.000113024	0.000177608	0	0	0	9.69e-05	0	0	0	0	0.000177608	0	0	0	0	0	0	0	0	0	0	0.000274486	0	0	0	0	0	0	0	0	0.000226047	0	0	0.000177608	0	0	0	0	0	0	0	0	0	0	0.000113024	0	0
ASV1434	0	6.46e-05	0	0	0	0	0	0	0	0	0	0	0	0	9.69e-05	0	0	0	0	0	0	4.84e-05	0	0	0	0	0.000113024	0	0.000177608	0	8.07e-05	0.000775019	0	0	0	6.46e-05	0	0	0	4.84e-05	0	0	0	6.46e-05	0	0	0	0	8.07e-05
ASV1435	0	4.84e-05	1.61e-05	0	0	0	3.23e-05	0	3.23e-05	0	0	0	0	0	0	0.000435948	0	0	0	0	0	0	0	0	0	0	0	0	0	0	0	0.000322924	0	0	0	8.07e-05	0	0	8.07e-05	6.46e-05	0	0	0	0	0	0	0	0.000532825	0
ASV1436	0	0	0	0	0	0	0	0	0	0	0	0	0	0	0	0	0	0	0	0	0	0	0	0	0	0	0	0	0	0	0	0	0	0	0	0	0.00012917	0	0	0	0	0	0	0	0	0	0	0	0.00122711
ASV1437	0	0	0	0	0	0	0	0	0	0	0	0	0	0	0.000484387	0	0	0	0	0	0.0012594	0	0	0	0	0	0	0	0	0	0	0	0	0	0	0	0	0	0	0	0	0	0	0	0	0	0	0	0
ASV1438	0	0	0	0	0	0	0	0	0	0	0	0	0	0	0	0.000839603	0	0	0	0	0.000177608	0.000613556	0	0	0	0	0	0	0	0	0	0	0	0	0	0	0	0	0	0	0	0	0	0	0	0	0	0	0
ASV1439	0	0	0	0	0	0	0	0	0	0	0	0	0	0.00177608	0	0	0	0	0	0	0	0	0	0	0	0	0	0	0	0	0	0	0	0	0	0	0	0	0	0	0	0	0	0	0	0	0	0	0
ASV1440	0	0	0	0	0	0	0	0	0	0	0	0	0	0	0	0	0	0.000387509	0.000403656	0	0	0	0	0	0	0	0	0	0	0	0	0	0	0	0	0	0	0	0	0	0	0	0	0	0	0	0	0	0
ASV1441	0	0	0	0	0	0	0	0	0	0	0	0	0	0	0	0	0.000823457	0	0	0	0	0	0.000968773	0	0	0	0	0	0	0	0	0	0	0	0	0	0	0	0	0	0	0	0	0	0	0	0	0	0
ASV1442	0	0	0	0	0	0	0	0	0	0	0	0	0	0.000888042	0	0	0	0	0	0	0	0	0	0	0.000629703	0	0	0	0	0	0	0	0	0	0.000242193	0	0	0	0	0	0	0	0	0	0	0	0	0	0
ASV1443	0	0	0	0.000775019	0	0	0	0	0	0	0	0	0	0	0	0	0	0	0	0	0	0	0	0	0	0	0	0	0	0	0	0	0	0	0	0	0	0	0.00012917	0.000403656	0	0	0	0	0	0	0	0	0
ASV1444	0	0	0	0	0	0	0	0.000936481	0	0	0	0	0	0	0	0	0	0	0	0	0	0	0	0	0	0	0	0	0	0	0	0	0	0	0	0	0	0	0	0	0	0	0	0	0	0	0	0	0
ASV1445	0	0	0	0.000500533	0	0	0	0	0	0.000274486	0	0	0	0	0.000419802	0	0	0	0	0	0	0	0	0	0	0	0	0	0	0	0	0	0	0	0	0	0.000290632	0	0	0	0	0	0	0	0	0	0	0	0.000161462
ASV1446	0	0.000274486	0	0	0	0	0	0	0	0.000968773	0	0	0	0	0	0	0	0	0	0	0	0	0	0	1.61e-05	0	0	0	0	0	0	0	0	0	0	0	0	0	0	0	0	0	8.07e-05	0.000193755	0	0	0	4.84e-05	0
ASV1447	0	0	0	0	0	0	0	0	0	0	0	0	0	0	0	0	0	0	0	0	0	0	0	0	0	0	4.84e-05	0.000177608	0	0	0	3.23e-05	0.00046824	8.07e-05	0	4.84e-05	0	0	0	0	0	8.07e-05	0	0	1.61e-05	0	0	4.84e-05	0
ASV1448	0	0	0	0	0	0	0	0	0	0	0	0	0	0	0	0	0	0	0	0	0	0	0	0	0	0	0	0	0	0	0	0	0	0	0	0	0	0	0	0	0	0	0	0	0	0	0	0	0
ASV1449	0	0	0	0	0	0	0	0	0	0	0	0	0	0	0	0	0	0	0	0	0	0	0	0	0	0	0	0	0	0	0	0	0.00172765	0	0	0	0	0	0	0	0	0	0	0	0	0	0	0	0
ASV1450	0	0	0	0	0	0	0	0	0	0	0	0	0	0.000306778	0	9.69e-05	0.000209901	0	6.46e-05	0	0	0.000452094	0.000113024	0.000193755	0	0.00025834	0	0	0	0	0	0	0	0	0	0	0	0	0	0	0	0	0	0	0	0	0	0	0
ASV1451	0	0	0	0	0	0	0	0	0	0	0	0	0	0	0	0	0	0	0	0	0	0	0	0	0	0	0	0	0	0	0	0	9.69e-05	0.000145316	0.000209901	0	0	0	0	0	0	0	0	0.000145316	0.000226047	0.000145316	0	0	0
ASV1452	0	0	0	0	0	0	0	0	0	0	0	0	0.000888042	0	0	0	0	0	0	0	0	0	0	0	0.000758872	0	0	0	0	0	0	0	0	0	0	0	0	0	0	0	0	0	0	0	0	0	0	0	0
ASV1453	0	0	0	0	0	0	0	0	0	0	0	0	0	0	0	0	0	0	0	0	0	0.000209901	0	0	0.000113024	0	0	0	0	0	0	0	0	0	0.00127555	0	0	0.000161462	0	0	0	0	0	0	0	0	0	0	0
ASV1454	0	0	0	0	0.000290632	0	0	0	0	0	0.000532825	0	0	0.000775019	0	0	0	0	0	0	0	0	0	0	0	8.07e-05	0	0	0	0	0	0	0	0	0	0	0	0	0	0	0	0	0	0	0	0	0	0	0
ASV1455	0	0.00111409	0	0	0	0	0	0	0	0	0	0	0	0	0	0	0	0	0	0	0.000209901	0.000322924	0	0	0	0	0	0	0	0	0	0	0	0	0	0	0	0	0	0	0	0	0	0	0	0	0	0	0
ASV1456	0.00106565	0	0	0	0	0	0	0	0	0	0	0.000322924	0	0	0	0	0	0	0	0	0	0	0	0	0	0	0	0	0	0	0	0	0	0	0	0	0	0	0	0	0	0	0	0	0	0	0	0	0.000339071
ASV1457	0.000209901	0	0	0	0	0	0	0	0	0	0	0	0	0	0	0	0	0	0	0	0	0	0	0	0	0	0	0	0	0	0.00106565	0	0	0	0	0	0	0.000371363	0	0	0	0	0	0	0	0	0	0	0
ASV1458	0	0	0	0	4.84e-05	0	0	0	0	0	0	0	0	0	0	0	0	0	0	0	0	0	0	0	0	0	0	0	0	0	0	0	0	0	0	0	0	0	0	0	0.000177608	0	0	0	0	0	6.46e-05	8.07e-05	0.00025834
ASV1459	0	0	0	0	1.61e-05	0	0	0	0	0	8.07e-05	3.23e-05	0	9.69e-05	0	0	0	0	0	0.000226047	0	0	3.23e-05	0	0	0	0	0	0	0	0	0	1.61e-05	0	0	4.84e-05	0	0	0.000193755	0	0	0	0	0.000113024	0.000661995	0	0	0	0
ASV1460	0	0	0	0	0	0	0	0	0	0	0	0	0	0	0	0	0	0	0	0	0	0	0	0	0	0	0	0	0	0.000387509	0	0	0	0	0	0	0	0	0	0	0	0.000742726	0	0	0	0	0	0	0
ASV1461	0	0	0	0	0	0	0	0	0	0	0	0	0	0	0	0	0	0	0	0	0	0	0	0	0	0	0	0	0	0	0	0.00012917	0	3.23e-05	0.00025834	0	0	0	0	0	0	0	0	0.000242193	0.000306778	9.69e-05	0	0	0
ASV1462	0	0	0	0	0	0	0	0	0	0	0	0	0	0	0	0	0	0	0	0	8.07e-05	0	0	0	0	0	0	0	0	0	0	0	0	0.000290632	0	0	0	0	0	0	0	0	0	0	0	0	0	0	0
ASV1463	0	0	0	0	0	0	0	0	0	0	0	0	0	0	0	0	0	0	0	0	0	0	0	0	0	0	0	0	0	0	0	0	0	0	0	0	0	0	0	0	0.00179223	0	0	0	0	0	0	0	0
ASV1464	0	0	0	0	0	0	0	0	0	0	0	0	0.000419802	0	0.000161462	0	0	0	0	0	0	0	0.00106565	0	0	0	0	0	3.23e-05	0	0	0	0	0	0	0	0	0	0	0	0	0	0	0	0	0	0	0	0
ASV1465	0	0	0.000226047	0	0	0	0	0	0.000242193	0.00124326	0	0	0	0	0	0	0	0	0	0	0	0	0	0	0	0	0	0	0	0	0	0	0	0	0	0	0	0	0	0	0	0	0	0	0	0	0	0	0
ASV1466	0	0.0012594	0	0	0	0	0.000355217	0	0	0	0	0	0	0	0	0	0	0	0	0	0	0	0	0	0	0	0	0	0	0	0	0	0	0	0	0	0	0	0	0	0	0	0	0	0	0	0	0	0
ASV1467	0	0	0	0	0	0	0	0	0	0	0	0	0	0	0	0	0	0	0	0	0	0	0	0	0	0	0	0	0	0	0	0	0	0	0	0	0	0	0	3.23e-05	0	0	0	0	0	0.00124326	0	0.000355217	0
ASV1468	0.000306778	0.000678141	0	0	0	0	0.000629703	0	0	0	0	0	0	0	0	0	0	0	0	0	0	0	0	0	0	0	0	0	0	0	0	0	0	0	0	0	0	0	0	0	0	0	0	0	0	0	0	0	0
ASV1469	0.000113024	0	0	0	0	0	0	0	0	0	0	0	0	0	0	0	0	0	0	0	0	0	0	0.00012917	0	0	0	0	0	0	0	0	0	0	0	0.000161462	0.000177608	0.000500533	0	0.000371363	0	0	0.000161462	0	0	0	0	0	0
ASV1470	0	1.61e-05	0	0	0	0	0	0	0	0	0	0	0	0	0	0	0	0	0	0	0	0	0	0	0	0	0	0	0	0	0	0	0	0	0	0.000161462	0.000322924	3.23e-05	0	0.000435948	8.07e-05	0	8.07e-05	0	0	6.46e-05	0	0	0
ASV1471	0	0	0	8.07e-05	0	0	0	4.84e-05	0	0.00148545	0	0	0	0	0	0	0	0	0	0	0	0	0	4.84e-05	0	0	0	0	0	0	0	0	0	0	0	0	0	0	0	0	0	0	0	0	0	0	0	0	0
ASV1472	0	0	0	0	0.000775019	0	0	0	0	0	0.000613556	0	0	0	0	0	0	0.000290632	0	0	0	0	0	0	0	0	0	0	0	0	0	0	0	0	0	0	0	0	0	0	0	0	0	0	0	0	0	0	0
ASV1473	0	0	0	0	0	0	0.00164691	0	0	0	0	0	0	0	0	0	0	0	0	0	0	0	0	0	0	0	0	0	0	0	0	0	0	0	0	0	0	0	0	0	0	0	0	0	0	0	0	0	0
ASV1474	0	0	0	0	0	0	0	6.46e-05	0	0	0	0	0	0	0	0	0	0	0	0	0	0	0	0	0	0	0	0	0	0	0	0	0	0	0	0	0	0	0.000193755	0	0	0	0	0.00121097	0	0	0	0	0
ASV1475	8.07e-05	0	0	0	0	0	0	0.000710434	0	0	0.000322924	0.000177608	1.61e-05	0	0	0	0	0	0.000145316	0	0	0	0	0	0	0	0	0	0	0	0	0	0	0	0	0	0	0	0	0	0	0	0	0	0	0	0	0	0
ASV1476	0	0	0	0	0	0	0	0	0	0	0	0	0	0	0	0	0	0	0	0	0	0	0	0	0	0	0	0	0	0	0	0	0	0	0	0	0	0	0	0	0	0	0	0	0.0015016	0	0	0	0
ASV1477	0	0	0	0	0	0	0	0	0.00025834	0.000371363	0	0	0	0	0	0	0.000306778	0	0	0	0	0	0	0	0	0	0	0	0	0	0	0	0	0	0	0	0	0	0	0.000306778	0	0	0	0.000209901	0	0	0	0	0
ASV1478	0	0	0	0	0	0	0	0	0	0	0	0	0	0	0	0	0	0	0	0	0	0	0	0	0.000226047	0.000322924	0	0	0.000984919	0	0	0	0	0	0	0	0	0	0	0	0	0	0	0	0	0.000161462	0	0	0
ASV1479	0	0	0	0	0	0	0	0	0	0	0	0	0	0	0	0.000274486	0	0	0	0	0	0	0	0	0	0	0.000403656	0	0	0	0	0	0.000242193	0	0	0	0	0	0	0	0	0	0	0	0	0	0	0.00072658	0
ASV1480	0	0	0	0	0	0	0	0	0	0	0	0	0	0	0	0	0	0	0	0	0.000242193	0	0	0	0	0	0	0	0	0	0	0	0	0	0.00145316	0	0	0	0	0	0	0	0	0	0	0	0	0	0
ASV1481	0	0	0	0	0	0	0	0	0	0	0	0	0	1.61e-05	0	0.000355217	0	0	0	0	0	0	0	0	0	0	0	0	0.000355217	0.000548971	0	0	0	0	0	0.000322924	0	0	0	0	0	0	0	0	0	0	0	0	0
ASV1482	0	0	0	0	0	0	0	0	0	0	0	0	0	0	0	0	0	0	0	0	0	0	0	0	0	0	0	0	0	0	0	0	0	0	0	0	0	0	0	0	0	0	0	0	0	0	0	0	0.00025834
ASV1483	0	0	0	0	0	0	0	0	0	0	0	0	0	0	0	0.000936481	0.000452094	0	0	0	0	0	0	0	0	0	0	0	0.000193755	0	0	0	0	0	0	0	0	0	0	0	0	0	0	0	0	0	0	0	0
ASV1484	0	0	0	0	0	0	0	3.23e-05	0	0	0.00012917	0	0	0	0	0.000355217	0	0	0	0.000274486	0	0	0	0	0	0	0	0	0	0	0	0	0	0	0	0	0	0	0	0.000355217	0	8.07e-05	0	0	0	0.000209901	0	0	0
ASV1485	0	0	0	0	0	0	0	0	0	0	0	0	0	0	0	0	0	0	0	0	0.000177608	0	0	0	0	0	0	0	0	0	0	0	4.84e-05	0	0	3.23e-05	9.69e-05	0	0	0	0	0	0	0.000791165	4.84e-05	0.000145316	0	0	0
ASV1486	0	0	0	0	0.00166306	0	0	0	0	0	0	6.46e-05	0	0	0	0	0	0	0	0	0	0	0	0	0	0	0	0	0	0	0	0	0	0	0	0	0	0	0	0	0	0	0	0	0	0	0	0	0
ASV1487	0	0	0.000322924	0	0	0	0	0	0	0	0	0	0	0	0	0	0	0	0	0	0	0	0	0	0	0	0	0	0	0	0	0	0	0	0	0	0	0	0	0	0	0	0	0	0	0	0	0.000694287	0
ASV1488	0	0	0	0	0	0	0	0.00137243	0	0.000145316	0	0	0	0	0	0	0	0	0	0	0	0	0	0	0	0	0	0.000113024	0	0	0	0	0	0	0	0	0	0	0	0	0	0	0	0	0	0	0	0	0
ASV1489	0	0.00012917	0	0	0	0	0	0	0	0	0	0	0	0	0	0	0	0	0	0	0.000322924	0	0	0.000113024	0	0	0	0	0	0	0	0	0	0.000177608	0	0	0	0	0	0	0	0	3.23e-05	0	0	0	0.000548971	0	0
ASV1490	0	0	0	0	0	0	0	0	0	0	0	0	0	0	0	0	0	0	0	0	0	0	0	0	0	0	0	0	0	0	0	0	0	0	0	0	0.00156618	0	0	0	0	0	0	0	0	0	0	0	0
ASV1491	0	0	0	0	0	0	0	0	0	0	0	0	0.000339071	0	0	0	4.84e-05	0.000565118	0	0	0	0	0	0	0	0	0	0	0	0	0	0	0	0	0	0	0	0	0.00025834	0	0.000371363	0	0	0	0	8.07e-05	0	0	0
ASV1492	0	0	0	0	0	0	0	0	0	0	0	0	0	0	0	0	0	0	0	0	0	0	0	0	0	0	0	0	0	0	0	0	0	0	0	0	0	0	0	0	0	0	0	0	0.00143701	0	0	0	0
ASV1493	0	0	0	0	0	0	0	0	0	0	0	0	0	0	4.84e-05	0	0	0	0	0	0	0	0	0	0	0	0	0	0	0	0	0	0	0	0	0	0	0	0	0	0	0	0	0	0	0	0	0	0
ASV1494	0	0	0	0	8.07e-05	0	0	0	0	0	0	0	0	0	0.000113024	0	0	0	0	0	0	0	0	0	0	0	0.00117867	0	0	0	0	0	0.000161462	0	0	0	0	0	0	0	0	0	0	0	0	0	0	0	0
ASV1495	0	0	0	0	9.69e-05	4.84e-05	0	0.00130784	4.84e-05	6.46e-05	8.07e-05	0	0	0	0	0	0	0	0	0	0	0	0	0	0	0	0	0	0	0	0	0	0	0	0	0	0	0	0	0	0	0	0	0	0	0	0	0	0
ASV1496	0	0	0	0	0	0	0	0	0	0	0	0	0	0	0	0	0	0	0	0	0	0	0	0	0	0	0	0	0	0	0	0	0	0	0	0	0.000161462	0	0	0	0	0	0	0	0	0	0	0	0.00140472
ASV1497	0	0	0	0	0	0	0	0	0	0	0	0	0	0	0	0	0	0	0	0	0	0	0	0	0	0	0	0	0.000209901	0	0	0	0	0	0	0	0	0	0	0.00012917	0.00025834	0	0	0	0	0	0.000306778	0	0
ASV1498	0	0	0	0	0	0	0	0	0	0	0	0	0	0	0	0	0	0	0	0	0	0	0	0	0	0	0	0	0	0	0	0	0	0	0	0	0	0	0	0	0.000355217	0	0	0	0	0	0.00117867	0	0
ASV1499	0	0	0	0	0	0	0	0	0	0	0	0	0	0	0	0	0	0	0	0	0	0	0	0	0	1.61e-05	0	0	0	0	0	0	0	0	0	0	0	0	0	0	0	0	0	0	0	0	0	0	0.00100107
ASV1500	0	0	0	0	0	0	0	0	0	0	0	0	0	0	0	0	0	0	0	0	0	0	0	0	0	0	0	0	0	0	0	0	0	0	0	0	0	0	0	0	0	0	0	0	0	0	0	0	0
ASV1501	0	0	0	6.46e-05	0.000290632	0	0	0	0.000193755	0.000209901	0	0	0	0	0	0	0.000548971	0	0	0	0	0	0.000452094	0	0	0	0	0	0	0	0	0	0	0	0	0	0	0	0	0	0	0	0	0	0	0	0	0	0
ASV1502	0	0	0	0	0	0	0	0	0	0	0	0	0.000371363	0	0	0	0	0	0	0	0	0	0	0.000177608	0	0	0	0	0	0	0	0	0	0	0	0	0.000177608	0	0	0	0	6.46e-05	0	0	4.84e-05	0	0	0	0
ASV1503	0	0	0	0	0	0	0	0	0	0	0	0	0	0	0	0	0	0	0	0	0	0	0	0	0	0	0	0	0	0	0	3.23e-05	0	0.00012917	0	0	0	0	0	0	0	0	0	0.000290632	0.000113024	0.000113024	0	0	0
ASV1504	0	0	0	0	0	0	9.69e-05	0	0	0.000452094	0	0	0	0	0	0	0.000193755	0	0	0	0	0	0	0	0	0	0	0	0	0	0.000645849	0.000226047	0	0	0	0	0	0	0	0	0	0	0	0	0	0	0	0	0
ASV1505	8.07e-05	0	0	0	0	0	0.000484387	0.000419802	0.000403656	0	0	0	0	0	0	0	0	0	0	0	0	0	0	0	0	0	0	0	0	0	0	0	0	0	0	0	0	0	0	0.000306778	0	0	0	0	0	0	0	0	0
ASV1506	0	0	0	0	0	0	0	0	0	0	0	0	0	0	0	0	0	0	0	0	0	0	0	0	0	0	6.46e-05	0	0	0	0	0	0	0	0	0	0	0	0	0	0	0	6.46e-05	0	0	0	0	0	0.000161462
ASV1507	0	0	0	0	0	0	0	0	0	0	0	0	0	0	0	0	0	0	0	0	0	0	0	0	0	0	0	0	0	0	0	0.000161462	0	0	0.000193755	0	0	0	0	0	0	0	0	0.000145316	0.00025834	0	0	3.23e-05	0
ASV1508	0	0	0	0	0	0	0	0	0	0	0	0	0	0	0	0	0	0	0	0	0	0	0	0	0	0	0	0	0	0	0	0.00156618	0	0	0	0	0	0	0	0	0	0	0	0	0	0	0	0	0
ASV1509	0	0	0	0	0	0	0	0	0	0	0	0	0	0	0	0	0	0	0	0	0	0	0	0	0	0	0	0	0	0	0	0	0	0	0.00166306	0	0	0	0	0	0	0	0	0	0	0	0	0	0
ASV1510	0	0	0	0	0	0	0	0	0	0	0	0	0	0	0	0	0	0	0	0	0	0	0	0.0015016	0	0	0	0	0	0	0	0	0	0	0	0	0	0	0	0	0	0	0	0	0	0	0	0	0
ASV1511	0	0	0	0	0	0	0	0	0	0	0	0	0	0	0	0	0	0	0	0	0	0	0	0	0	0	0	0	0	0	0	0	0	0	0	0	0	0	0	0	0	0	0	0	0	0	0	0	0
ASV1512	0	0	0	0	0	0	0	0	0	0	0	0	0	0	0	0	0	0	0	0	0	0	0	0	0	0	0	0.00142087	0	4.84e-05	0	0	0	0	0	0	0	0	0	0	0	0	0	0	0	0	0	0	0
ASV1513	0	0	0	0	0	0	0	0	0	0	0	0	0	0	0.00146931	0	0	0	0	0	0	0	0	0	0	0.00012917	0	0	0	0	0	0	0	0	0	0	0	0	0	0	0	0	0	0	0	0	0	0	0
ASV1514	0	0	0	0	0	0	0	0	0	0	0	0	0	0	0	0	0	0	0	0	0	0	0	0	0	0	0	0	0	0	0	0	0	0	0	0	0	0	0.00059741	0	0	0	0	0	0.000823457	0	0	0	0
ASV1515	0	0	0	0	0	0	0	0	0	0.000290632	0	0	0	0	0	0	0	0	0	0	0	0	0	0	0	0	0	0	0	0	0	8.07e-05	0.00012917	0	0	0	0	0	0	0	0	0	0	0.000161462	0.00025834	8.07e-05	0	0	0
ASV1516	0.00012917	0	0	0	0	0	0	0	0	0	0	0	8.07e-05	0	0	0	0	0.000290632	9.69e-05	0	0	0	0	0	0	0	0	0	0	0	0	0	0	0	0	0.00046824	0	0	0	0	0	0	0	0.000274486	0	0	0	0	0
ASV1517	0	0	0.000371363	0	0.000371363	0	0	0	0.000290632	0	0.000484387	0	0	0	0	0	0	0	0	0	0	0	0	0	0	0	0	0	0	0	0	0	0	0	0	0	0	0	0	0	0	0	0	0	0	0	0	0	0
ASV1518	0	0	0	0.000339071	0.00012917	4.84e-05	9.69e-05	0.000274486	0.000274486	0	0.000177608	6.46e-05	0	0	0	0	0	0	0	0	0	0	0	0	0	0	0	0	0	0	0	0	0	0	0	0	0	0	0	0	0	0	0	0	6.46e-05	0	0	0	0
ASV1519	0	0	0	0.000193755	0	0	6.46e-05	0	0	0	0.000403656	8.07e-05	0	0	0	0	0	0	0	4.84e-05	0	0	0	0	0	0	0	0	0	0	0	0	0	0	6.46e-05	0	0	0	0	0	0.000242193	0	0	0	0	0	0	0	0
ASV1520	0	0	0	0	0	0	0	0	0	0	0	0	4.84e-05	0.00103336	0	0	0	0	0	0	0	0	0	0	0	0.000435948	0	0	0	0	0	0	0	0	0	0	0	0	0	0	0	0	0	0	0	0	0	0	0
ASV1521	0	0	0	0	0	0	0	0	0	0	0	0	0	0	0	0	0	0	0	0	0	0	0	0	0	0	0	0	0	0	0	0	0	0	0	0	0	0	0	0	0	0.000694287	0	0	0	0	0	0	0
ASV1522	0	0	0	0	0	0	0	0	0	0	0	0	0	0	0	0	0	0	0	0	0	0	0	0.000758872	0	0	0	0	0.000839603	0	0	0	0	0	0	0	0	0	0	0	0	0	0	0	0	0	0	0	0
ASV1523	0	0	0	0	0	0	0	0	0	0	0	0	0	0	0	0	0	0	0	0	0	0	0	0.00146931	0	0	0	0	0	0	0	0	0	0	0	0	0	0	0	0	0	0	0	0	0	0	0	0	0
ASV1524	0	0	0	0	0	0	0	0	0	0	0	0	0	0	0	0	0	0	0	0	0	0	0	0	0	0	0	0	0	0	0	9.69e-05	0	0	0.000145316	0	0	0	0	0	0	0	0	0.000290632	0	0.000145316	0	0	0
ASV1525	0	0	0	0	0	0	0	0	0	0	0	0	0	0	0	0	0	0	0	0	0	0	0	0	0	0	0	0	0	0	0	0.000193755	0	0	0	0	0	0	0	0	0	0	0	0.000888042	0	0	0	0	0
ASV1526	0	0	0	0	0	0	0	0	0	0	0	0	0	0	0	0	0	0	0	0	0	0	0	0	0	0	0	0	0	0	0	0	0	0	0	0	0	0	0	0	0.00161462	0	0	0	0	0	0	0	0
ASV1527	0	0	0	0	0	0	0	0	0	0	0	0	0	0	0	0	0	0	0	0	0	0.000242193	0	0	0	0	0	0	0	0	0	0	6.46e-05	0	0	0	0	0	0.000904188	0	0	0	0	0	0.000209901	0	0	0	0
ASV1528	0	0	0	0	0	0	0.000161462	0	0	0	0	0	0	0	0	0	0	0	0	0	0	0	0	0	0	0	0	0	0	0	0.00106565	1.61e-05	0	3.23e-05	0	0	0	0	0	0	0	0	3.23e-05	0	0	0	0	0	0
ASV1529	0	0	0	0	0.000177608	0.000888042	0	0	0	0	0	0.000581264	0	0	0	0	0	0	0	0	0	0	0	0	0	0	0	0	0	0	0	0	0	0	0	0	0	0	0	0	0	0	0	0	0	0	0	0	0
ASV1530	0	0	0	0.000226047	0	0	9.69e-05	0.000226047	0	0	0	0	0	0	0	0	0	0	0	0	0	0	0.000145316	0	0	0	0	0	0	4.84e-05	0	0	0	0	0	0	3.23e-05	0	0	0	0	0.00072658	0	0	0	0	0	0	0
ASV1531	8.07e-05	6.46e-05	0.000145316	0	0	0	0	0	4.84e-05	0	0.000145316	0	0	0	0	0	0	0	0	0	0	9.69e-05	0.000161462	0	0.000145316	0	0	0	0	1.61e-05	0	0.000145316	0	0	0	0	0	4.84e-05	0.000177608	0	0	0	0	0	0	1.61e-05	0	0	0.000161462
ASV1532	0	0	0	0	0	4.84e-05	0	0.000355217	0.000193755	0.000242193	0.000694287	0	0	0	0	0	0	0	0	0	0	0	0	0	0	0	0	0	0	0	0	0	0	0	0	0	0	0	0	0	0	0	0	0	0	0	0	0	0
ASV1533	0	0	0	0	0	0	0	0	0	0	0	0	0.000678141	0	0	0	4.84e-05	0	0	0	0	0	0	0	0.000742726	0	0	0	0	0	0	0	0	0	0	0	0	0	0	0	0	0	0	0	0	0	0	0	0
ASV1534	0	0	0	0	0	0	3.23e-05	0	0	0	0	0	0.000274486	0	0	0	0	3.23e-05	0	0	0	0	0	0	0	0	0	0	0	0	0	0	0	0	0	0	0	0	0.00012917	0	0.000371363	0	0	0	0	0	0	0	0
ASV1535	0	0	0	0	0	0	0	0	0	0	0	0	0	0	0	0	0	0	0	0	0	0	0	0	0	0.000209901	0	0	0	0	0	0.000177608	0	0	0	0.00012917	0.000113024	0	4.84e-05	0	0	0	0	0	0.000113024	0	0	0.00025834	0
ASV1536	0	0	0	0	0	0	0	0	0	0	0	0.00025834	0.00119482	0	0	0	0	0	0	0	0	0	0	0	0	0	0	0	0	0	0	0	0	0	0	0	0	0	0	0	0	0	0	0	0	0	0	0	0
ASV1537	0	0	0	0	0	0	0	0.000936481	0	0	0	0	0	0	0	0	0	0	0	0	0	0	0	0	0	0	0	0	0	0	0	0	0	0	0	0	0	0	0	0	0	0	0	0	0	0	0	0	0
ASV1538	0	0	0.000339071	0	0	0	0.000193755	0	0.00106565	0	0	0	0	0	0	0	0	0	0	0	0	0	0	0	0	0	0	0	0	0	0	0	0	0	0	0	0	0	0	0	0	0	0	0	0	0	0	0	0
ASV1539	0	0	0	0	0	8.07e-05	0	0	0	0	0	0.000387509	0	0	0	0	0	0	0	0	0	0	0	0	0	0	0	0	0	0	0	0	0	0.00046824	0	0	0	0	0	0	0	0	0	0	0	0	0	0	0
ASV1540	0	0	0	0	0	4.84e-05	0	0.000113024	0	0	0	0	0	0	0	0	0	0	0	0	0	0	3.23e-05	0	0	0	0	0	0	0	0.000452094	0	0	3.23e-05	0	0	0	0	6.46e-05	0	0.000532825	9.69e-05	6.46e-05	0	0	9.69e-05	0	0	0
ASV1541	0.000661995	0.000548971	0	0	0	0	0.000306778	0	0	0	0	0	0	0	0	0	0	0	0	0	0	0	0	0	0	0	0	0	0	0	0	0	0	0	0	0	0	0	0	0	0	0	0	0	0	0	0	0	0
ASV1542	0	0	0	0	0	0	0	0	0	0	0	0	0	0	0	0	0	0	0	0	0	0	0	0	0	0	0	0	0	0	0	0.000177608	0	0.000177608	0	0	0	0	0	0	0	0	0	0.000193755	0	0.000306778	0	0	0
ASV1543	0	0	0	0	0	0	0	0	0	0	0	0	0.000290632	0.000306778	0	0	0	0	0.000548971	0	0	0	0	0	0	0	0	6.46e-05	0	0	0	0	0	0	0	0	0	0	0	0	0	0	0	0	0	0	0	0	0
ASV1544	0	0	0	0	0	0	0	0	0	0	0	0	0	0	0	0	0	0	0	0	0	0	0	0	0	0	0	0	0	0	0	0	0	0	0.00158233	0	0	0	0	0	0	0	0	0	0	0	0	0	0
ASV1545	0	0	0	0	0	0	0	0	0	0	0	0	0	0	0	4.84e-05	0	0	0.00122711	0	0	0	0	0	0	0	0	0	0	0	0	0	0	0	0	0	0	0	0	3.23e-05	0	0	0	0	0	0	0	0	0
ASV1546	0	0	0.00135628	0	0	0	0	0	0	0	0	0	0	0	0	0	0	0	0	0	0	0	0	0	0	0	0	0	0	0	0	0	0	0	0	0	0	0	0	0	0	0	0	0	0	0	0	0	0
ASV1547	0	0	0	0	0	0	0	0	0.000290632	0.000306778	0.000161462	0	0	0	0	0	0	0	0	0	0	0	0	0	0	0	0	0	0	0	0	0	0.000161462	0	0.00012917	0	0	0	0	0	0	0	0	0	0	0	0	0	0
ASV1548	0	8.07e-05	0	0	0	0	0.000161462	0	0	0	0	0	0	0	0	0	0	0	0	0	0	0	0	0	0	0	0	0	0	0	0	0	0	0	0	0	0	0	0	0	0	0	0	0	0	0	0	0	0
ASV1549	0	0	9.69e-05	0	0	0	0	0	0	4.84e-05	0	0	0	0	0	0	0	0	0.00012917	0	8.07e-05	0	0	0	0	0	0	0	0	0	0	3.23e-05	0.000339071	0	0	0	0	0	0	0	6.46e-05	0	0	0	1.61e-05	0	1.61e-05	8.07e-05	3.23e-05
ASV1550	0	0	0	0	0	0	3.23e-05	0	0	0.000387509	0	0	0	0	0	0	0	8.07e-05	0	0.000274486	0	0	9.69e-05	0	8.07e-05	0.000161462	0	0	0	0.000161462	0	0.000113024	0	0	0	0	0	0	0	0	0	0	0	0	0	0	0	0	0
ASV1551	0	0	0	0	0	0	0	0	0.000355217	0	0	0	0	0	0	0	0	0	0	0	0	0	0	0	0	0	0	0	0	0	0	0	0	0	0	0	0	0	0	0	0	0	0	0	0	0	0	0.000113024	0
ASV1552	0	0	0	0	0	0	0	0	0	0	0	0	0	0	0	0	0	0	0	0	0	0	0	0	0	0	0	0	0	0	0	0	0	0	0	0	0	0	0	0	0	0.000161462	0	0	0	4.84e-05	0	0	4.84e-05
ASV1553	0	0	0	0	0	0	0	0	0	0	0	0	0	0	0	0	0	0	0	0	0	0	0	0	0	0	0	0	0	0	0	0	0	0	0	0	0	0	0	0	0	0	0	0	0	0.000177608	0	0	0
ASV1554	0	0	0	0	0	0	0	0	0	0	0	0	0	0	0	0	0	0	0	0	0	0	0.000500533	0	0	0	0	0	0	0	0	0	0	0	0	0	0	0	0	0	0	0	0	0	0	0	8.07e-05	0	0
ASV1555	0	0	0	0	0	0	0	0	0	0	0	0	0	0	0	0	0	0	0	0	0	0	0.00109794	0	0.000339071	0	4.84e-05	0	0	0	0	0	0	0	0	0	0	0	0	0	0	0	0	0	0	0	0	0	0
ASV1556	0	0	0	0	0	0	0	0	0	0	0	0	0	0	0	0	0	0	0	0	0	0	0	0	0	0	0	0	0	0	0.0015016	0	0	0	0	0	0	0	0	0	0	0	0	0	0	0	0	0	0
ASV1557	0	0	0	0	0	0	0	0	0	0	0	0	0	0	0	0.000484387	0	0	0	0	0	0.00059741	0	0	0	0	0	0	0	0	0	0	0	0	0	0	0	0	0	0	0	0	0	0	0	0	0	0	0
ASV1558	0	0	0	0	0	0	0	0	0	0	0	0	0	0	0	0	0	0	0	0	0	0	0	0	0	0	0	0	0	0	0	0	0	0	0	0	0	0	0	0	0	0	0	0	0	0	0	0	0
ASV1559	0	0	0	0	0	0	0	0	0	0	0	0	0	0	0	0	0	0	0	0	0	0	0	0	0	0	0	0	0	0	0	0	0	0	0	0	0	0	0	0	0	0	0	0	0	0	0	0	0
ASV1560	0.000177608	0.000226047	0.000452094	0	0.000339071	0	0	0	0	0	0	0	0	0	0	0	0	0	0	0	0	0	0	0	0	0	0	0	0	0	0	0	0	0	0.000242193	0	0	0	0	0	0	0	0	0	0	0	0	0	0
ASV1561	0	0	0	0	0	0	0	0	0	0	0	0	0.00072658	1.61e-05	3.23e-05	0	0	0	0	0	0	0	0	0	0.000645849	0	0	0	0	0	0	0	0	0	0	0	0	0	0	0	0	0	0	0	0	0	0	0	0
ASV1562	0	0	0	0	0	0.00159848	0	0	0	0	0	0	0	0	0	0	0	0	0	0	0	0	0	0	0	0	0	0	0	0	0	0	0	0	0	0	0	0	0	0	0	0	0	0	0	0	0	0	0
ASV1563	6.46e-05	0	8.07e-05	0	0	0.000209901	0	0	0	0	0.000500533	0	0	0	0	1.61e-05	0	0	0	0	4.84e-05	0	0	0	0	0	0	0	0	0	0	4.84e-05	4.84e-05	0	0	8.07e-05	0	0	0	0	0.000113024	0	0	0	0.000145316	0	0	0	0
ASV1564	0	0	0.00130784	0	0	0	0	0	0	0	0	0	0	0	0	0	0	0	0	0	0	0	0	0	0	0	0	0	0	0	0	0	0	0	0	0	0	0	0	0	0	0	0	0	0	0	0	0	0
ASV1565	0	0	0	0.000710434	0	0	9.69e-05	0	0	0	0	0	0	0	0	0	0	0	0	0	0	0	0	0	0	0	0	0	9.69e-05	0.000113024	0	0	0	0	4.84e-05	0.000145316	0	0	0	0	0	0	0	0	0	0	0	0.000209901	0
ASV1566	0	0	0	0	0	0	0	0	0	0	0	0	0	0	0.00012917	0	0	0	0	0	0	0	0	0	0	0	0.000274486	0	0	0	0	0	0.000339071	0	0	0	0	0	0	0	0	0	0	0	0	0	0	0	0
ASV1567	0	0	0	0	0	0.000419802	0.0010495	0	0	0	0	0	0	0	0	0	0	0	0	0	0	0	0	0	0	0	0	0	0	0	0	0	0	0	0	0	0	0	0	0	0	0	0	0	0	0	0	0	0
ASV1568	0	0	0	0	0	0	0	0	0	0	0	0	0	0	0	0	0	0	0	0	0	0	0	0	0	0	0	0	0	0	0	0	0	0	0	0	0	0.00046824	0	0	0	0	0	0	0	0	0	0	0
ASV1569	0	0.000193755	4.84e-05	0.000145316	0	3.23e-05	0.000113024	8.07e-05	8.07e-05	0.000274486	0.000452094	0	0	0	0	0	0	0	0	0	0	0	0	0	0	0	0	0	0	0	0	0	0	0	0	0	0	0	0	0	0	0	0	0	0	0	0	0	0
ASV1570	0	0	0	0	0.000613556	0	0	0	0	0	0	0	0	0	0.000581264	0	0	0	0	0	0	0	0	0	0	0	0	0	0	0	0	0	0	0	0	0	0.000306778	0	0	0	0	0	0	0	0	0	0	0	0
ASV1571	0	0.000145316	0.000339071	0	0	0	0.000290632	0	0.00072658	0	0	0	0	0	0	0	0	0	0	0	0	0	0	0	0	0	0	0	0	0	0	0	0	0	0	0	0	0	0	0	0	0	0	0	0	0	0	0	0
ASV1572	0	0	0	0	0	0	0	0	0	0	0	0	0	0	0	0	0	0	0	0	0	0	0	0	0	0	0	0	0	0	0	0	0	0	0	0	0	0	0	0	0.000419802	3.23e-05	0	0	3.23e-05	0	0.000710434	0	0
ASV1573	0	0	0	0	0	0	0	0	0	0	0	0	0	0	0	0	0	0.00124326	0	0	0	0	0	0.000226047	0	0	0	0	0	0	0	0	0	0	0	0	0	0	0	0	0	0	0	0	0	0	0	0	0
ASV1574	0	0	0	0	0	0	0	0	0	0	0	0	0.000500533	0	0	0	0	0	0	0	0	0	0	0	0.000904188	0	0	0	0	0	0	0	0	0	0	0	0	0	0	0	0	0	0	0	0	0	0	0	0
ASV1575	0	0	0	0	0	0	0	0	0	0	0	0	0	0.000193755	0	0	0	0	0	0	0	0	0	0	0	0.000565118	0	0	0	0	0	0	0	0	0	0	0	0	0	0	0	0	0	0	0.000532825	0	0	0	0
ASV1576	0	0	0	0	0	0	0	0	0	0	0	0	0	0	0.000242193	0.000226047	0	0.000193755	0	0	0	0	0.000290632	0	0.000209901	0	0	0	0.000339071	0	0	0	0	0	0	0	0	0	0	0	0	0	0	0	0	0	0	0	0
ASV1577	0	0	0	0	0	0	0	0	0.00161462	0	0	0	0	0	0	0	0	0	0	0	0	0	0	0	0	0	0	0	0	0	0	0	0	0	0	0	0	0	0	0	0	0	0	0	0	0	0	0	0
ASV1578	0	0	0	0	0	0	4.84e-05	3.23e-05	6.46e-05	0	0.00121097	0	0	0	0	0	0	0	0	0	0	0	0	0	0	0	0	0	0	0	0	0	0	0	0	0	0	0	0	0	0	0	0	0	0	0	0	0	0
ASV1579	0	0	0	0	0	0.000113024	0	0	0	0	0	0	0	0	0	0	0	0	0	0	0.000209901	0	0	0	0	0	0	0	0	9.69e-05	0	0	0	0	0	0	0	0	0	0	0	0	0	0	0	0	0	0.000145316	0
ASV1580	0	8.07e-05	0	0	0	0	0	9.69e-05	0	0	0	0	9.69e-05	0	0	0	0	0	4.84e-05	0	0	0	0	0	0	0	0	0	0	3.23e-05	0	0	0	0	0	0	0	0	0.000193755	0.00012917	0	0.000193755	0	0	0.000113024	0.000193755	0.000161462	0	0
ASV1581	0	8.07e-05	0	0	0	0	0.000242193	0	0	0	0	0	0	0	0	0	0	0	0	0	0	0.00085575	0	0	0	0	0	0	0	0	0	0	0	0	0	0	0	0	0	0	0	0	0	0	0	0	0	0	0
ASV1582	0	0	0	0	0	0.000839603	0	0	0	0	0	0	0	0	0	0	0	0	0	0	0	0	0	0	0	0	0	0	0	0	0	0	0	0	0	0	0	0	0	0.000629703	0	0	0	0	0	0	0	0	0
ASV1583	0	0	0	0	0	0	0	0	0	0	0	0	0	0	0	0	0	0	0	0	0	0	0	0	0	0	0	0	0	0	0	0	0	0	0	0	0	0	0	0	0.000581264	0	0	0	0	0	0	0	0
ASV1584	0	0	0	0	0	0	0	0	0	0	0	0	0	0	0	0	0	0	0	0	0	0	0	0	0	0	0	0	0.000435948	0	0	0	0	0	0	0	0	0	0	0	0.00059741	0	0	0	0	0	0.000419802	0	0
ASV1585	0	0	0	0	0	0	0	0	0	0	0	0	0	0	0	0	0	0	0	0	0	0.000371363	0	0	0	0	0	0	0	0	0	0	0.0010495	0	0	0	0	0	0	0	0	0	0	0	0	0	0	0	0
ASV1586	0	0	0	0	0	0	0.000177608	0	0	0	0	0	0	0	0	0	0	0	0	0	0	0	0	0	0	0	0	0	0	0	0	0	0	0	0	1.61e-05	0	0	3.23e-05	0	0	0	0	0	0	0	0.000904188	0.000145316	0
ASV1587	0	0	0	0	0	0	0	0	0	0	0	0	0	0	0	0	0	0	0	0	0	0	0	0	0	0	0	0	0	0	0	0	0	0.00025834	0	0	0	0	0	0	0	0	0	0	0.000113024	0.000290632	0	0	0
ASV1588	0	0	0	0	0	0	0	0	0	0	0	0.000113024	0	0	0	0	0	0	0	0	0	0	0	0	0	0	0	0.000403656	0	0	0	0	0	0	0	0	0	0	0	0	0.000419802	0	0	0	0	0	0	0	0.000419802
ASV1589	0	0	0	0	0	0	0	8.07e-05	0	0	0	0.000306778	0	0	0	0	0	0	0	0	0	0	0	0	0	0	0	0	0	0	0.000290632	0	0	0	0	0	0	0.000193755	0	0.000226047	0	0.000290632	0	0	0	0	0	0	0
ASV1590	0	0	0	0	0	0	0	0	0	0	0.00134014	0	0	0	0	0	0	0	0	0	0	0	0	0	0	0	0	0	0	0	0	0	0	0	0	0	0	0	0	0	0	0	0	0	0	0	0	0	0
ASV1591	0	0	0	0.000161462	0	0	0	0	0.00138857	0	0	0	0	0	0	0	0	0	0	0	0	0	0	0	0	0	0	0	0	0	0	0	0	0	0	0	0	0	0	0	0	0	0	0	0	0	0	0	0
ASV1592	0	0	0.000242193	0	0	0	0	0	0	0.000403656	0	0	0	0	0	0	0	0	0	0	0	0	0	0	0	0	0	0	0	0	0	0	0	0	0	0	0	0.000177608	0.000226047	0	0	0	0	0	0	0	0	0	0.000290632
ASV1593	0	0.00117867	0	0	0	0	0	0	0	0	0	0	0	0	0	0	0	0	0	0	0	0	0	0	0	0	0	0	0	0	0	0	0	0	0	0	0	0	0	0	0	0	0	0	0	0	0	0	0
ASV1594	6.46e-05	0.00012917	0	0	0	0	0	0	0	0	0	0	0	0	0	0	0	0	0	0	0	0	0	0	0	0	0	0	0.000113024	0	0	0	4.84e-05	0	0	1.61e-05	4.84e-05	0	4.84e-05	0	0	0	6.46e-05	0	4.84e-05	0	0	4.84e-05	0
ASV1595	0	0	0	0	0	0	0	0	0.00012917	0	0	0	0	0	0	0	0	0	0	0	0	0.00012917	0	0	0	0	0	0	0	0	0	0	0	0	0	0	0	0	0	0	0	0.00012917	0	0	0	0	0	0.00109794	0
ASV1596	0	0	0	0	0	0	0	0	0	0	0	0	0	0	0	0	0	0	0	0	0	0	0	0	0	0	0	0	0	0	0	0	0.000452094	0	0	0	0	0	0	0	0	0	0	0.000742726	0	0	0	0	0
ASV1597	0	0	0	0	0	0	0	0	0	0	0	0	0	8.07e-05	0	0	0	0	0	0	0	0	0	0	6.46e-05	0.00085575	0	0	3.23e-05	0	0	9.69e-05	0	0	0	0	0	0	0	0	0	0	0	0	0	0	0	0	8.07e-05
ASV1598	0	0	0	0	0	0	0	0	0	0	0	0	0	0	0	0	6.46e-05	0	0	0	0	0	0	0	4.84e-05	0	0	0	0.00113024	0	0	0	0	0	0.000290632	0	0	0	0	0	0	0	0	0	0	0	0	0	0
ASV1599	0	0	0	0	0	0	0	0	0	0	0	0	0	0	0	0	0.000904188	0	0	0	0	0	0.000290632	0	0	0	0	0	0	0	0	0	0	0	0	0.000113024	0	0	0	0	0	0	0	0	0	0	0	0	0
ASV1600	0	0	0	0	0	0	0	0	0	0	0	0	0	0	0	0	0.000145316	0	0	0	0	0	0	0	0.00059741	0	0	0	0	0	0	0.00025834	0.00025834	0	0	0	0	0	0	0	0	0	0	0	0	0	0	0	0
ASV1601	0	0	0	4.84e-05	0	6.46e-05	4.84e-05	0	0.000226047	0.000500533	0.000387509	0.000145316	0	0	0	0	0	0	0	0	0	0	0	0	0	0	0	0	0	0	0	0	0	0	0	0	0	0	0	0	0	0	0	0	0	0	0	0	0
ASV1602	0	0	0	0	0	0	0	0	0	0	0	0	0	0	0	0	0	0	0	0	0	0	0	0	0	0	0	0.00130784	0	0	0	0	0	0	0	0	0	0	0	0	0	0	0	0	0	0	0	0	0
ASV1603	0	0	0	0	0	0	0	0	0	0	0	0.000888042	0	0	0	0	0	0	0	0	0	0	0	0	0	0	0	0	0	0	0	0	0	0	0	0.000500533	0	0	0	0	0	0	0	0	0	0	0	0	0
ASV1604	0	0	0	0	0	0	0	0	0	0	0	0	0.000904188	0	0	0	0	0	0	0.000355217	0	0	0	0	0	0	0	0	0	0	0	0	0	0	0	0	0	0	0	0	0	0	0	0	0	0	0	0	0
ASV1605	0	0	0	0	0	0	0	0	0	0	0	0	0	0	0	0	0	0	0	0	0	0	0	0	0.00025834	0	0	0	0	0	0.000193755	0	0	0	0	0.00012917	0	0.000274486	0	0	0	0	0	0	0	0	0	0	0
ASV1606	4.84e-05	0	0	0.000177608	0	0	0	0.000193755	0	0.00012917	6.46e-05	0	0	0	0	0	0	0	0	0	0	0	0	0	0	0	0	0	0	0	0.000209901	0	0.000500533	0	0	0	0	0	0	0	0	0	0	0	0	0	0	0	0
ASV1607	0	0	0	0	0	0	0	0.000145316	0	0	0	0	0	0.00025834	0	0	0	0	0	0	0	0	0	0	8.07e-05	0	0	0	0	0	0	0	0	0	0	0	0	0	0	0	0.00025834	0.000274486	0	0	0	0	0	0.000113024	0
ASV1608	0	0.000581264	0	0	0	0	0	0	0	0	0	0	0	0	0	0	0	0	0	0	0	0	0	0	0	0	0	0	0	0	0	0	0	0	0	0	0	0	0	0	0	0	0	0.000419802	0	0.000274486	0	0	0
ASV1609	0	0	0	0	0	0	0	0	0	0	0	0	0	0	0	0	0	0	0	0	0	0	0	0	0	0	0	0	0	0	0	0	0	0	0.00142087	0	0	0	0	0	0	0	0	0	0	0	0	0	0
ASV1610	0	0	0	0	0	0	0	0	0	0	0	0	0.000274486	0	0	0	0	0	0	0	8.07e-05	0	0	0	0	0	0	0	0	0	0	0	0	0	0	0.000823457	0	0	0	0	0	0	0	0.000113024	0	0	0	0	0
ASV1611	0	0	0	0	0	0	0	0	0	0	0	0	0	0	0	0	0	0	0	0	0	0	0	0	0	0	0	0	0	0.000920335	0	0	0	0	0	0.00025834	0	0	0	0	0	0	0	0	0	0	0	0	0
ASV1612	0	0	0	0	0	0	0	0	0	0	0	0	0	0	0	0	0	0	4.84e-05	0	0	0.00127555	0	0	0	0	0	0	0	0	0	0	0	0	0	0	0	0	0	0	0	0	0	0	0	0	0	0	0
ASV1613	0	0	0	0	0	0	0	0	0	0	0	0	0	0	0	0.000823457	0	0	0	0	0	0	0	0	0	0	0	0	0	0	0.000500533	0	0	0	0	0	0	0	0	0	0	0	0	0	0	0	0	0	0
ASV1614	0	0	0	0	0	0	0	0	0	0	0	0	0	0	0	0	0	0	0	0	0	0.0010818	0	0	0	0	0	0	0	0	0	0	0	0	0	0	0	0	0	0	0	0	0	0.000242193	0	0	0	0	0
ASV1615	0	0.00012917	0	0	4.84e-05	0	0.000113024	0.000113024	0.000113024	0.000371363	0.000403656	8.07e-05	0	0	0	0	0	0	0	0	0	0	0	0	0	0	0	0	0	0	0	0	0	0	0	0	0	0	0	0	0	0	0	0	0	0	0	0	0
ASV1616	0	0	0	0	0	0	0	0	0	0	0	0	0	0	0	0	0	0	0	0	0	0	0.000113024	0	0	0	0	0	0	0	0	0.000177608	0	0	0	0	0	0	9.69e-05	0	0	0	0	3.23e-05	6.46e-05	0	0.000839603	0	0
ASV1617	0	0	0	0	0	0	0	0.00137243	0	0	0	0	0	0	0	0	0	0	0	0	0	0	0	0	0	0	0	0	0	0	0	0	0	0	0	0	0	0	0	0	0	0	0	0	0	0	0	0	0
ASV1618	0	0	0	0	0	0	0.000274486	0	0	0	0	0	0	0	0	0	0	0	0	0	0	0	0	0	0	0	0	0	0	0	0	0	0	0	0	0.00012917	0	0.000209901	0	0.00012917	0.000161462	0.000209901	0	0	0	0	0	0.000161462	0
ASV1619	0	0	0	8.07e-05	0	0	0	0	0	0	0	6.46e-05	0	0	0	0	0	0	0	0	0	0	0	0	0	0	0	0	0	0	0	0.000161462	9.69e-05	6.46e-05	0.000177608	0	0	0	0	0	0	0	0	6.46e-05	0.000113024	0.000145316	0	0	0
ASV1620	0.000113024	0.000242193	0.000113024	0	0	0	0	0	0.000161462	0	8.07e-05	0	0	0	0.000145316	4.84e-05	0	0	0	0	0	0	0.000113024	0	0	0	0	9.69e-05	0	0	0	0	0	0	0	0	0	0	0	0	0	0	0	0	0	0	0	0	0
ASV1621	0	0	0	0	0	0	0	0	0.0015016	0	0	0	0	0	0	0	0	0	0	0	0	0	0	0	0	0	0	0	0	0	0	0	0	0	0	0	0	0	0	0	0	0	0	0	0	0	0	0	0
ASV1622	0	0	0	0	0	0	0	0	0	0.000113024	0	0	0	0	0	0	0	0	0	0	0	0	0	0	0	0	0	0	0	0	3.23e-05	0	0	8.07e-05	0.000403656	0	0	0	0	0	0	0	0	8.07e-05	0.000177608	8.07e-05	0	0	3.23e-05
ASV1623	0	0	0	0	0	0	0	0	0	0	0	0	0	0	0	0	0	0	0	0	0	0	0	0	0	0	0	0	0	0	0	0	0	0	0	0	0	0	0	0.00130784	0	0	0	0	0	0	0	0	0
ASV1624	0	0	0	0	0	0	0	0	0	0	0	0	0	0	0	0	0	0	0	0	0	0	0	0	0	0	0	0	0	0	0	0	0	0	0.00140472	0	0	0	0	0	0	0	0	0	0	0	0	0	0
ASV1625	0	0	6.46e-05	0	0	0	0	0.00012917	0	0	0	0	0	0	0	0	0	0	0	0	0	0	0	0	0	0	0	0	0	0	0	0	0	0	0	0	0	0.000161462	0	0	0	0	0	0	0	0	0	0	0
ASV1626	0	0	0	0	0	0.00142087	0	0	0	0	0	0	0	0	0	0	0	0	0	0	0	0	0	0	0	0	0	0	0	0	0	0	0	0	0	0	0	0	0	0	0	0	0	0	0	0	0	0	0
ASV1627	0	0	0	0	0	0	0	0	0	0	0	0	0	0	0	0	0	0	0	0	0	0	0	0	0	0	0	0	0	0	0	6.46e-05	0	0	0	0	0	0	0	9.69e-05	0	0	0	0.00113024	0	0	0	0	0
ASV1628	0	0	0	0	0	0	0	0	0	0	0	0	0	0.000839603	0	0	0	0	0	0	0	0	0	0	0	0.000355217	0	0	0	4.84e-05	1.61e-05	0	0	0	0	0	0	0	0	0	0	0	0	0	0	0	0	0	0
ASV1629	0	0	0	0	0	0	0	0	0	0	0	0	0	0	0	0	0	0	0	0	0	0	0	0	0	0	0	0	0	0	0	0	0	0	0	0	0	0	0	0	0	0	0	0	0	0	0	0	0
ASV1630	0	0	0	0	0	0	0	0	0	0	0	0	0	0	0	0	0	0	0.000452094	0.000290632	0.000145316	9.69e-05	0.000226047	0	0	0	0	0	0	0	0	0	0	0	0	0	0	0	0	0	0	0	0	0	0	0	0	0	0
ASV1631	0	0	0	0	0	0	0	0	0	0	0	0	0	0.000888042	0	0	0	0	0	0	0	0	0	0	0	0.000371363	0	0	0	0	0	0	0	0	0	0	0	0	0	0	0	0	0	0	0	0	0	0	0
ASV1632	0	0	0	0	0	0	0	0	0	0	0	0	0	0	0	0	0	0	0	0	0	0	0	0	0	0	0	0	0	0	0	0	0	0	0	0	0	0	0	0	0	0	0	0	0	0	3.23e-05	0	0
ASV1633	0	0	0	0	0	0	0.0012917	0	0	0	0	0	0	0	0	0	0	0	0	0	0	0	0	0	0	0	0	0	0	0	0	0	0	0	0	0	0	0	0	0	0	0	0	0	0	0	0	0	0
ASV1634	0	0	0	0.00012917	0	4.84e-05	1.61e-05	0	0	0.00072658	0	0	0	0	0	0	0	0	0	0	0	0	0	0	0	0	0	0	0	0	0	0	0	0	0	0	0	0	0	0	0	0	0	0	0	0	0	0	0.000371363
ASV1635	0	0	0	0.00085575	0	0	0	0	0	0	0	0	0	0	0	0	0	0	0	0	0	0	0	0	0	0	0	0	0	0	0	0	0	0	0	0.000322924	0	0	0	0	0	0	0	0	0	0	0	0	0
ASV1636	0	0	0	0	0	0	0	0	0	0	0	0	0	0	0	0	0	0	0	0	0	0	0	0	0	0	0	0	0	0	0	0	0	0.000145316	0.000226047	0	0	0	0	0	0	0	0	0.000209901	0	0.000226047	0	0	0
ASV1637	0	0	0	0	0	0	0	0	0	0	0	0	0	0	0	0	0	0	0	0	0	0	0	0	0	0	0	0	0	0	0	0	0	0	0	0	0	0	0	0	0	0	0	0	0	0	0	0	0.00127555
ASV1638	0	0	0	0	0	0	0	0	0	0	0	0	0	0	0	0	0	0	0	0.000548971	0	0.000678141	0	0	0	0	0	0	0	0	0	0	0	0	0	0	0	0	0	0	0	0	0	0	0	0	0	0	0
ASV1639	0	0	0	0	0	0	0	0	0	0	0	0	0	0.000936481	0	0	0	0	0	0.000339071	0	0	0	0	0	0	0	0	0	0	0	0	0	0	0	0	0	0	0	0	0	0	0	0	0	0	0	0	0
ASV1640	0	0	0	0	0	0	0	0	0	0	0	0.00135628	0	0	0	0	0	0	0	0	0	0	0	0	0	0	0	0	0	0	0	0	0	0	0	0	0	0	0	0	0	0	0	0	0	0	0	0	0
ASV1641	0	0	0	0	0	0	0	0	0	0	0.00072658	0	0	0	0	0	0	6.46e-05	0	0	0	0	0	0	0	0	0	0	0	8.07e-05	0	0	0	0.000371363	0	0	0	0	0	0	0	0	0	0	0	0	0	0	0
ASV1642	0	0	0	0	0	0	0	0	0	0.00130784	0	0	0	0	0	0	0	0	0	0	0	0	0	0	0	0	0	0	0	0	0	0	0	0	0	0	0	0	0	0	0	0	0	0	0	0	0	0	0
ASV1643	0	0	0	0	0.000452094	0	0	0	0	0	0.000145316	0	0	0	0	0	0	0	0	0	0	0	0	0	0	0	0	0	0	0	0	0	0	0.00046824	0	0	0	0	0	0	0	0	0	0	0	0	0	0	0
ASV1644	0	0	0	0	0	0	0	0	0	0.000435948	0	0	0	0	0	0	0	0	0	0	0	0	0	0	0	0	0	0	0	0	0	0	0	0	0	0	0	0	0	0	0	0	0	0	0	0	0	0	0
ASV1645	0	0	0	0	0	0	0	0	0	0	0	0	0	0	0	0	0	0	0	0	0	0	0	0	0	0	0	0	0	0	0	0	0.000226047	0	0	0	0	0	0	0	0	0	0	8.07e-05	0.000145316	0.000209901	0	0	0
ASV1646	0	0	0	0	0	0	0	0	0	0	0	0	0	0	0	0	0	0	0	0	0	0	0	0.000193755	0	0	0	0	0	0	0	0.000274486	0	0	0	0	0	0	0	0	0	0	0	0.000371363	0	0	0	0	0
ASV1647	0	0	0	0	0	0	0	0	0	0	0	0	0	0	0	0	0	0	0	0	0	0	0	0	0	0	0	0	0	0	0	0	0	0	0	0	0	0	4.84e-05	0.000226047	0	0	0	0	0	0.00085575	0	0	0
ASV1648	0	0	0	0	0	0	0	0	0	0	4.84e-05	0	0.000145316	0.000193755	0	0	0	0	0	0	0	0	0	0	0	0	0	0	0	0	0	0	0	0	0	0	0	0	0.00012917	0	0	0	0	0	0.000645849	0	0	0	0
ASV1649	0	0	0	0	0	0	0	0	0	0	0.00122711	0	0	0	0	0	0	0	0	0	0	0	0	0	0	0	0	0	0	0	0	0	0	0	0	0	0	0	0	0	0	0	0	0	0	0	0	0	0
ASV1650	0	0	0	0.000678141	0	0	0	0	0	0	0	0	0	0	0	0	0	0	0	0	0	0	0	0	0	0	0	0	0	0	0.000516679	0	0	0	0	0	0	0	0	0	0	0	0	0	0	0	0	0	0
ASV1651	0	0	0	0	0	0	0	0.00127555	0	0	0	0	0	0	0	0	0	0	0	0	0	0	0	0	0	0	0	0	0	0	0	0	0	0	0	0	0	0	0	0	0	0	0	0	0	0	0	0	0
ASV1652	0	0	0	0	0.000532825	0	0	0	0	0.000177608	0	0	0	0	0	0	0	0	0	0	0	0	0	0	0	0	0	0	0	0	0	0	0	0	0	0	0	0	0	0	0	0	0	0	0.000290632	0	0	0	0
ASV1653	0	0	0	0.00114638	0	0	0	0	0	0	0	0	0	0	0	0	0	0	0	0	0	0	0	0	0	0	0	0	0	0	0	0	0	0	0	0	0	0	0	0	0	0	0	0	0	0	0	0	0
ASV1654	0	0	0	0.00025834	0	0	0.00012917	0.000242193	0.000242193	0.00012917	0.000290632	0	0	0	0	0	0	0	0	0	0	0	0	0	0	0	0	0	0	0	0	0	0	0	0	0	0	0	0	0	0	0	0	0	0	0	0	0	0
ASV1655	0	0	0	0	0	0	0.00119482	0	0	0	0	0	0	0	0	0	0	0	0	0	0	0	0	0	0	0	0	0	0	6.46e-05	0	0	0	0	0	0	0	0	0	0	0	0	0	0	0	0	0	0	0
ASV1656	0	0	0	0	0	0	0	0	0	0	0	0	0	0	0	0	0	0	0	0	0	0	0	0	0	0	0	0	0	0	0	0	0	0	0	0	0	0	0	0	0	0	0	0	0	0	0.00101721	0	0
ASV1657	0	0	0	0	0	0	0	0	0	0	0	0	0	0	0	0	0	0	0	0	0	0	0	0	0	0	0	0	0	0.00109794	0	0	0	0	0	0	0	0	0	0	0	0	0	0	0	0	0	0	0
ASV1658	0	0	0	0	0	0	0	0	0	0	0	0	0	0	0	0	0	0	0	0	0.00121097	0	0	0	0	0	0	0	0	0	0	0	0	0	0	0	0	0	0	0	0	0	0	0	0	0	0	0	0
ASV1659	0	0	0	0	0	0	0	0	0	0	0	0	0	0	0	0	0	0	0	0	0	0	0	0	0	0	0	0	0	0	0	0	0	0	0	0.000371363	0	0	0	0	0	0	0	0	0	0	0	0.000452094	0
ASV1660	0	0	0	0	0	0	0	0	0	0	0	0	0	0	0	0	0	0	0	0	0	0	0	0	0	0	0	0	0	0	0	6.46e-05	3.23e-05	6.46e-05	0.000209901	0	0	0	0	0	0	0	0	0.00012917	0.00012917	0.000226047	0	0	0
ASV1661	0	0	0	0	0	0	0	0	0	0	0	0	0	0	0	0	0	0	0	0	0	0	0	0	0	0	0	0	0	0	0.00114638	0	0	3.23e-05	0	0	0	0	0	0	0	0	4.84e-05	0	0	0	0	0	0
ASV1662	0	0	0	0	0	0	0	0	0	0	0	0	0	0	0	0	0	0	0	0	0	0	0	0	0	0	0	0	0	0	0	0	0	0	0	0	0	0	0	0.0012594	0	0	0	0	0	0	0	0	0
ASV1663	0	0	0	0	0	0	0	0	0	0	0	0	0	0	0	0	0	0	0	0	0	0	0	0	0	0	0	0	0	0	0	0	0	0	0	0	0	0.00117867	0	0	0	0	0	0	0	0	0	0	0
ASV1664	0	0	0.000435948	0	0	0	0	0	9.69e-05	0	0	0	0.00025834	0	0	0	0	0	0	0.000403656	0	0	0	0	0	0	0	0	0	0	0	0	0	0	0	0	0	0	0	0	0	0	0	0	0	0	0	0	0
ASV1665	0	0	0	0	0	0	0	0	0	0	0	0	0	0	0	0	0	0	0	0	0	0	0	0	0	0	0	0	0	4.84e-05	0	4.84e-05	0	0	0	0	0	0	0	0	0	0	0	0	0.00100107	0	0	0	0
ASV1666	0	0	0	0	0	0	0	0	0	0	0	0	0	0	0	0	0	0	0	0	0	0	0	0	0	0	0	0	0	0	0	0	0.00124326	0	0	0	0	0	0	0	0	0	0	0	0	0	0	0	0
ASV1667	0	0	0	0	0	0	0	0	0	0	0	0	0	0	0	0	0	0	0	0	0	0	0	0	0	0	0.000242193	0	0	0	0	0	0.000968773	0	0	0	0	0	0	0	0	0	0	0	0	0	0	0	0
ASV1668	0	0	0	0	0	0	0	0	0	0	0	0	0	0	0	0	0	0	0	0	0	0.00117867	0	0	0	0	0	0	0	0	0	0	0	0	0	0	0	0	0	0	0	0	0	0	0	0	0	0	0
ASV1669	0	0	0	0	0	0	0	0	0	0	0	0	0	0	0	0	0	0	0	0	0	0	0	0	0	0	0	0	0	0	0	0	0	0	0	0	0	0	0	0	0	0	0.00121097	0	0	0	0	0	0
ASV1670	0	0	0	0	0	0	0.000209901	0	0.00012917	0	0	0	0.000193755	0	0	0	0	0	0.00046824	0	0	0	9.69e-05	0	0	0	0	0	0	0	0	0	0	0	0	0	0	0	0	0	0	0	0	0	0	0	0	0	8.07e-05
ASV1671	0	0	0	0.000161462	0	0	0	0	0.000113024	0	0.000161462	0.000113024	0	0	0	0	0	0	0	0	0	0	0	0	0	0	0	0	0	0	0	0	0	0	8.07e-05	0	0	0	0	0	0	0	0	0	0	0.000113024	0	0	0
ASV1672	0	0	0.00117867	0	0	0	0	0	0	0	0	0	0	0	0	0	0	0	0	0	0	0	0	0	0	0	0	0	0	0	0	0	0	0	0	0	0	0	0	0	0	0	0	0	0	0	0	0	0
ASV1673	0	0	0.000371363	0	0	0	0	0	0.000920335	0	0	0	0	0	0	0	0	0	0	0	0	0	0	0	0	0	0	0	0	0	0	0	0	0	0	0	0	0	0	0	0	0	0	0	0	0	0	0	0
ASV1674	0	0	0	8.07e-05	0	0	0	0	0	0	0	0	0	0	6.46e-05	6.46e-05	4.84e-05	0.000177608	0	0	6.46e-05	4.84e-05	0	0.000161462	4.84e-05	3.23e-05	0	0	0	0	0	0	6.46e-05	0	0	0	0	0	0	0	0	0	0	0	0	0	0	0	0
ASV1675	0	0	0	0	0.000177608	0	0	0	0	0	0	0	0	8.07e-05	0.000113024	9.69e-05	0	0	0	0	0	9.69e-05	0	0.000145316	9.69e-05	0	0	0	0	0	4.84e-05	0	0	4.84e-05	0	0	0	0	0	3.23e-05	0	0	0	4.84e-05	8.07e-05	0.000226047	0	0	0
ASV1676	0	0	0	0	0	0	4.84e-05	0	0	0	6.46e-05	0	0	0	0	0	0	0	0	0	0	0	9.69e-05	0	0	0	0	0.000145316	0.00025834	0	0	0	0	0	0	0	0	0	0	0	0	0	0	0	0	0	0	0	0
ASV1677	0	0	0	0	0	0	0	0	0.00138857	0	0	0	0	0	0	0	0	0	0	0	0	0	0	0	0	0	0	0	0	0	0	0	0	0	0	0	0	0	0	0	0	0	0	0	0	0	0	0	0
ASV1678	0	0	0	0	0	0	0	0	0	0	0.000242193	0	0	0	0	0	0	0	0	0	0	0	0	0	0	0	0	0	0	0	0.00012917	0	0.000113024	0	0	0	0	0	0	0	0	0	0	0	4.84e-05	0.000661995	0	0	0
ASV1679	0	0	0	0	0	0	0	0	0	0	0	0	0	0	0	0	0	0	0	0	0	0	0	0	0	0	0	0	0	0	0	0	0	0	0	0	0	0	0	0	0	0	0	0	0	0	0.00109794	0	0
ASV1680	0	0	0	0	0	0	0	0	0	0	0	0	0	0	0	0	0	0	6.46e-05	0.00101721	0	0	0	0	0	0	0	0	0	0	0	0	0	0	0	0	0	0	0	0	0	0	0	0	0	0	0	0	0
ASV1681	0	0	0	0	0	0	0	0	0	0	0	0	0	0	0	0	0	0	0	0	0	0	0.00122711	3.23e-05	0	0	0	0	0	0	0	0	0	0	0	0	0	0	0	0	0	0	0	0	0	0	0	0	0
ASV1682	0	0	0	0	0	0	0	0	0	0	0	0	0	0.00124326	0	0	0	0	0	0	0	0	0	0	0	0	0	0	0	0	0	0	0	0	0	0	0	0	0	0	0	0	0	0	0	0	0	0	0
ASV1683	0	0	0	0	0	0	0	0	0	0	0	0	0	0	0	0	0	0	0	0.0010818	0	0	0	0	0	0	0	0	0	0	0	0	0	0	0	0	0	0	0	0	0	0	0	0	0	0	0	0	0
ASV1684	0	0	0	0	0	0	0	0	0	0	0	0	0	0	0	0.000177608	0	0	0	0	0	0	0	0	0	0	0	0	0.000339071	0	0	0	0	0	0	0	0	0	0	0	0	0	0	0	0	0	0	0	0
ASV1685	0	0	0	0	0	0	0	0	0	0	0	0	0	0	0	0.0010818	0	0	0	0	0	0	0	0	0	0	0	0	0	0	0	0	0	0	0	0	0	0	0	0	0	0	0	0	0	0	0	0	0
ASV1686	0	0	0	0	0	0	0	0	0	0	0	0	0	0	0	0	0	0	0	0	0.000403656	0.000807311	0	0	0	0	0	0	0	0	0	0	0	0	0	0	0	0	0	0	0	0	0	0	0	0	0	0	0
ASV1687	0	0	0	0	0	0	0	0	0	0	0	0	0	0	0	0	0	0	0	0	0	0	0	0	0	0	0	0	0	0	0	0	0	0	0.000403656	0	0	0	0	0	0	0	0	0.000387509	0	6.46e-05	0	0	0
ASV1688	0	0	0	0	0	0	0	0.00124326	0	0	0	0	0	0	0	0	0	0	0	0	0	0	0	0	0	0	0	0	0	0	0	0	0	0	0	0	0	0	0	0	0	0	0	0	0	0	0	0	0
ASV1689	0	0	0	0.000161462	0.000339071	9.69e-05	0	0.000209901	0	0.000322924	0	0	0	0	0	0	0	0	0	0	0	0	0	0	0	0	0	0	0	0	0	0	0	0	0.000113024	0	0	0	0	0	0	0	0	0	0	0	0	0	0
ASV1690	0	0	0.000355217	0	0	0	0	0	0.000936481	0	0	0	0	0	0	0	0	0	0	0	0	0	0	0	0	0	0	0	0	0	0	0	0	0	0	0	0	0	0	0	0	0	0	0	0	0	0	0	0
ASV1691	0	0	0	0	0	0	0	0	0.00137243	0	0	0	0	0	0	0	0	0	0	0	0	0	0	0	0	0	0	0	0	0	0	0	0	0	0	0	0	0	0	0	0	0	0	0	0	0	0	0	0
ASV1692	0	0	0	0.000193755	0	0.000161462	0	0	0	0	0	0	0	0	0	0	0	0	0	0	0.000242193	0	9.69e-05	0	4.84e-05	0	0	0	0	0	0	0	0	0.000548971	0	0	0	0	0	0	0	0	0	0	0	0	0	0	0
ASV1693	0	0	0	0	0.0012594	0	0	0	0	0	0	0	0	0	0	0	0	0	0	0	0	0	0	0	0	0	0	0	0	0	0	0	0	0	0	0	0	0	0	0	0	0	0	0	0	0	0	0	0
ASV1694	0	0	0	0	0	0	0	0	0	0	0	0	0	0	0.000613556	4.84e-05	0	0	0	0	0	0	0	0	0	0	0	0	0	0	0	0	0	0	0	0.000435948	0	0	0	0	0	0	0	6.46e-05	0	0	0	0	0
ASV1695	0	0	0	0	0	0	0	0	0	0	0	0	0	0	0	0	0	0	0	0	0.00116253	0	0	0	0	0	0	0	0	0	0	0	0	0	0	0	0	0	0	0	0	0	0	0	0	0	0	0	0
ASV1696	0	0	0	0	0	0	0	0	0	0	0	0	0	0	0	0	0	0	0	0	0	0	0	0	4.84e-05	0	0	0	0.00130784	0	0	0	0	0	0	0	0	0	0	0	0	0	0	0	0	0	0	0	0
ASV1697	0	0	0	0	0	0	0	0	0	0	0	0	0	0	0	0	0	0	0	0	0	0	0	0	0	0	0	0	0	0.0010495	0	0	0	0	0	0	0	0	0	0	0	0	0	0	0	0	0	0	0
ASV1698	0	0	0	0	0	0	0	0	0	0	0	0	0	0	0	0	0	0	0	0	0	0	0	0	0	0	0	0	0	0	0	0	0	0	0	3.23e-05	0	0	0	0	0	0.000678141	0	0	0	0	0	0.000435948	0
ASV1699	0	0	0	0	0	0	0	0	0	0	0	0	0	0	0	0	0	0	0	0	0	0	0	0	0	0	0	0.00114638	0	0	0	0	0	0	0	0	0	0	0	0	0	0	0	0	0	0	0	0	0
ASV1700	0	0	0	0	0	0	0	0	0	0	0	0	0	0	0	0	3.23e-05	0	0	0	0	0	0	0.0010818	0	0	0	0	0	0	0	0	0	0	0	0	0	0	0	0	0	0	0	0	0	0	0	0	0
ASV1701	0	0	0	0	0	0	0	0	0	0	0	0	0	0	0	0	0	0	0	0	0	0	0	0.000161462	0	0	0	0	0	0.000177608	0	0	0	0	0	0	0	0	0	0	0	0.000355217	0	0	0	0	0	0	0
ASV1702	0	6.46e-05	0.000226047	6.46e-05	0.000306778	0	1.61e-05	0	0.000177608	0.000226047	8.07e-05	4.84e-05	0	0	0	0	0	0	0	0	0	0	0	0	0	0	0	0	0	0	0	0	0	0	0	0	0	0	0	0	0	0	0	0	0	0	0	0	0
ASV1703	0	0	0	0	0	0	0	0	0.00134014	0	0	0	0	0	0	0	0	0	0	0	0	0	0	0	0	0	0	0	0	0	0	0	0	0	0	0	0	0	0	0	0	0	0	0	0	0	0	0	0
ASV1704	0	0	0	0	0	0	0	0.00119482	0	0	0	0	0	0	0	0	0	0	0	0	0	0	0	0	0	0	0	0	0	0	0	0	0	0	0	0	0	0	0	0	0	0	0	0	0	0	0	0	0
ASV1705	0	0	0.000209901	0	0	0	0	0	0	0	0	0	0	0	0	0	0	0	0	0	0	0	0	0	0	0	0	0	0	0	0	0	0	0	0	0	0	0	0	0	0	0	0	0	0	0	0	0	0
ASV1706	0	0	0	0	0	0	0	0	0	0	0	0	0	0	0	0	0	0	0	0	0	0	0	0	0	0	0	0	0	0	0	0	0	0	0	0	0	0	0	0	0	0	0	0	0	0	0	0	0
ASV1707	0	0	0	0	0	0	0	0	0	0	0	0	0	0	0	0	0	0.00103336	0	6.46e-05	0	0	0	0	0	0	0	0	0	0	0	0	0	0	0	0	0	0	0	0	0	0	0	0	0	0	0	0	0
ASV1708	0	0	0	0	0	0	0	0	0	0	0	0	0	0	0	0	0.0012594	0	0	0	0	0	0	0	0	0	0	0	0	0	0	0	0	0	0	0	0	0	0	0	0	0	0	0	0	0	0	0	0
ASV1709	0	0	0	0	0	0	0	0	0	0	0	0	0	0.000613556	0	0	0	0	0	0	0	0	0	0	0	0.000484387	0	0	0	0	0	0	0	0	0	0	0	0	0	0	0	0	0	0	0	0	0	0	0
ASV1710	0	0	0	0	0	0	0	0	0	0	0	0	0	0	0	0	0	0	0	0	0	0	0	0	0	0	0	0	0	0	0.00113024	0	0	0	0	0	0	0	0	0	0	0	6.46e-05	0	0	0	0	0	0
ASV1711	0	0	0.000516679	0	0	0	0	0	0.000661995	0	0	0	0	0	0	0	0	0	0	0	0	0	0	0	0	0	0	0	0	0	0	0	0	0	0	0	0	0	0	0	0	0	0	0	0	0	0	0	0
ASV1712	0	0	0	0	1.61e-05	0.000274486	0	0	0.000306778	0	0	0	0	0	0	0	0	0	0	0	0	0	0	0	0	0	0	0	0	0	0	0	0	0	0	0	0	0	0	0	0	0.00059741	0	0	0	0	0	0	0
ASV1713	0	0	0	0	0	0	0	0	0	0	0	0	0	0	0	0	0	0	0	0	0	0	0	0	0	0	0	0	0	0	0	0	0.000193755	0	0	0	0	0	0	0	0	0.000161462	0	0	0	0.000322924	0.000290632	0	0
ASV1714	0	0	0	0	0	0	0	0	0	0	0	0	0	0	0	0	0	0	0	0	0	0	0	0	0	0	0	0	0	0	0	0	0	0	0	0	0	0	0	0	0	0	0	0	0	0	0	0	0
ASV1715	0	0	0	0	0	0	0	0	0	0	0	0	0	0	0	0	0	0	0	0	0	0	0	0	0	0	0	0	0	0	0	0	0	0	0	0.00113024	0	0	0	0	0	0	0	0	0	0	0	0	0
ASV1716	0	0	0	0	0	0	0	0	0	0	0	0	0	0	0.00025834	0	0	0	0	0	0	0	0.000290632	0	0	0	0	0	0	0	0	0	0	0	0	0	0	0	0	0	0	0	0	0	0	0	0	0	0
ASV1717	0	0	0	0	0	0	0	0	0	0	0	0	0	0	0	0	0	0	0	0	0	0	0	0	0	0	0	0	0	0	0	0	0.000145316	0	0.000226047	0	0	0	0	0	0	0	0	1.61e-05	0.00012917	9.69e-05	0	0	0
ASV1718	0	0	0	0	0	0	0	0	0	0	0	0	0	0	0	0	0	0	0	0	0	0	0	0	0	0	0	0	0	0	0	0	0	0	0.00122711	0	0	0	0	0	0	0	0	0	0	0	0	0	0
ASV1719	0	0	0	0	0	0	0	0	0	0	0	0	0	0.000193755	0	0	0	0	0	0	0.00025834	0	0	0	0	0	0	0	0	0.000355217	0	0	0	0	0	0	0	0	0	0	0	9.69e-05	0	0	0	0	0	0	0
ASV1720	0	0	0	0	0	0	0	0	0	0.000387509	0	0	0	0	0	0	0	0.000823457	0	0	0	0	0	0	0	0	0	0	0	0	0	0	0	0	0	0	3.23e-05	0	0	0	0	0	0	0	0	0	0	0	0
ASV1721	0	0	0	0	0	0	0	0	0.000984919	0	0	0	0	0	0	0	0	0	0	0	0	0	0	0	0	0	0	0	0	0	0	0	0	0	0	0	0	0	0	0	0	0	0	0	0	0	0.000242193	0	0
ASV1722	0	0	0	0	0	0	0	0	0.0012594	0	0	0	0	0	0	0	0	0	0	0	0	0	0	0	0	0	0	0	0	0	0	0	0	0	8.07e-05	0	0	0	0	0	0	0	0	0	0	0	0	0	0
ASV1723	0	0	0.00072658	0	0.000371363	0	0	0	0	0	0	0	0	0	0	0	0	0	0	0	0	0	0	0	0	0	0	0	0	0	0	0	0	0	0	0	0	0	0	0	0	0	0	0	0	0	0	0	0
ASV1724	3.23e-05	0	0	0	4.84e-05	0	0	0	0	0	0.000306778	0	0	0.000113024	0	0	0	0	0	0.000435948	0	0	0	0	0	0	0	0	0	0	0	0	0	0	0	0	0	0	0	0	0	4.84e-05	0	4.84e-05	0	0	0	0	0
ASV1725	0	0.000274486	0	0	0	0	0	0	0	0	0	0	0	0	0	0	0	0	0	0	0.00059741	0	0	0	0	0	0	0	0	0	0.000242193	0	0	0	0	0	0	0	0	0	0	0	0	0	0	0	0	0	0
ASV1726	0	0	0.00103336	0	0	0	0	0	0	0	0	0	0	0	0	0	0	0	0	0	0	0	0	0	0	0	0	0	0	0	0	0	0	0	0	0	0	0	0	0	0	0	0	0	0	0	0	0	0
ASV1727	0	0	0	0	0	0	0	0.000226047	0	0	0.000839603	0	0	0	0	0	0	0	0	0	0	0	0	0	0	0	0	0	0	0	0	0	0	0	0	0	0	0	0	0	0	0	4.84e-05	0	0	0	0	0	0
ASV1728	0	0	0	0	0	0	0	0	0	0	0	0	0	0	0	0	0	0	0	0	0	0	0	0.000209901	0	0	0	0	0	1.61e-05	0	0	0	0	0	0	0	0	0	0	0	0.000952627	0	0	0	0	0	0	0
ASV1729	0	0	0	0	0	0	0	0	0	0	0	0	0	0	0	0	0	0	0	0	0	0	0	0	0	0	0	0	0	0	0	0	0	0	0	0	0	0	0	0	0	0	0	0	0	0	0.00101721	0	0
ASV1730	0	0	0	0	0	0	0	0	0	0	0	0	0	0	0	0	0	0	0	0	0.00109794	0	0	0	0	0	0	0	0	0	0	0	0	0	0	0	0	0	0	0	0	0	0	0	0	0	0	0	0
ASV1731	0	0	0	0	0	0	0	0	0	0	0	0	0	0	0	0	0	0	0	0	0	0	0	0.0010495	0	0	3.23e-05	0	0	0	0	0	0	0	0	0	0	0	0	0	0	0	0	0	0	0	0	0	0
ASV1732	0	0	0	0	0	0	0	0	0	0	0	0	0	0	0	0	0	0	0	0	0	0	0	0	0	0	0	0	0	0	0	4.84e-05	0	0	0	0	0	0	0	0	0	0	0	0.00103336	0	0	0	0	0
ASV1733	0.000113024	0	0	0.000113024	0	0	0	0.000145316	0.000274486	0.000193755	0	0.00012917	0	0	0	0	0	0	0	0	0	0	0	0	0	0	0	0	0	0	0	0	0	0	0	0	0	0	0	0	0	0	0	0	0	0	0	0	0
ASV1734	0	0	0	0	0	0	0	0	0	0	0	0	0	0	0	0	0	0	0	0	0	0	0	0	0	0	0	0	0	9.69e-05	0	0	0	0	0	0.000290632	0	0	0	0.000177608	0	0	0	0	0	0.000516679	0	0	0
ASV1735	0.000145316	0.000242193	0	0	0	0	0	0.000113024	0	0	0	0	0	0	0	0	0	0	0	0	6.46e-05	0	0	0	0	0	0	0	0	0	0	4.84e-05	0	0.000500533	0	0	0	0	0	0	0	0	0	0	0	0	0	0	0
ASV1736	8.07e-05	0	6.46e-05	0	4.84e-05	9.69e-05	0	0	0	0	0	0	4.84e-05	0	0.00012917	0	6.46e-05	0	0	0	0	0	0	0	0	0	0	0	0	0	4.84e-05	0	0	4.84e-05	0	0	8.07e-05	0	0	0	3.23e-05	4.84e-05	4.84e-05	0	6.46e-05	4.84e-05	0	0	3.23e-05
ASV1737	0	0	3.23e-05	0.000968773	0	0	0	0	0	0	0	0	0	0	0	0	0	0	0	0	0	0	0	0	0	0	0	0	0	0	0	0	0	0	0	0	0	0	0	0	0	0	0	0	0	0	0	0	0
ASV1738	0	0	0	0	4.84e-05	0	0	0	0.000339071	0.000193755	0	0	0	0	0	0	0	0	0	0	0	0	0	0	0	0	0	0	0	0	0	0	0.000226047	0	0	0.00012917	0	0	0	0	0	0	0.000145316	4.84e-05	0	0	0	3.23e-05	0
ASV1739	0	0	0	0	0	0	0	0	0	8.07e-05	0	0	0	0	0	0	0	0	0	0	0	0	0	0	0	0	0	0	0	0	0	0	0	0	0	0.000242193	0	0	0	0	0	0	0	0	0.000290632	0.000113024	0	4.84e-05	0
ASV1740	0	0	0	0	0	0	0	0	0	0	0	0	0	0	0	0	0	0	0	0	0	0	0	0	0	0	0	0	0	0.000193755	0	0	0	0	0	0	0	0	0	0	0	0.00059741	0	0	0	0	0	0	0
ASV1741	0	0	0	0	0	0	0	0	0	0	0	0	0	0	0	0	0	0	0	0	0	0	0	0	0	0	0	0	0	0	0	0	0	0	0	0	0	0	0	0	0	0	0	0	0.000936481	0	0	0	0
ASV1742	0	0	0	0	0	0	0	0	0	0	0	0	0	0	0	0	0	0	0	0	0.000419802	0.000177608	0	0	0	0	0	0	0	0	0	0	0	0	0	0	0	0	0	0	0	0	0	0	0	0	0	0	0.000484387
ASV1743	0	0	0	0	0	0	0	0	0	0	0	0	0	0	0	0	0	0	0	0	0	0	0.00116253	0	0	0	0	0	0	0	0	0	0	0	0	0	0	0	0	0	0	0	0	0	0	0	0	0	0
ASV1744	0	0	0	0	0	0	0	0	0	0.000355217	0	0	0	0	0	0	0	0	0	0	0	0	0	0	0	0	0	0	0	0	0	0	0	0	0	0	0	0	0	0	0	0	0	0	0.000177608	0	0	0	0
ASV1745	0	0	0	0	0	0	0	0	0	0	0	0	0	0	0	0	0	0	0	0	0	0	0	0	0	0	0	0.0010495	0	0	0	0	0	0	0	0	0	0	0	0	0	0	0	0	0	0	0	0	0
ASV1746	0	0	0	0	0	0	0	0	0	0	0	0	0.000242193	0	0	0.000306778	0	0	0	0	0.000113024	0	0	0	0.000387509	0	0	0	0	0	0	0	0	0	0	0	0	0	0	0	0	0	0	0	0	0	0	0	0
ASV1747	0	0	0	0	0	0	0	0	0	0	0.0010495	0	0	0	0	0	0	0	0	0	0	0	0	0	0	0	0	0	0	0	0	0	0	0	0	0	0	0	0	0	0	0	0	0	0	0	0	0	0
ASV1748	0	0	0	0	0	0	0	0	0	0	0	0	0	0	0	0	0	0	0	0	0	0	0	0	0	0	0	0	0	0	0	0	0	0.00100107	0	0	0	0.000113024	0	0	0	0	0	0	0	0	0	0	0
ASV1749	0	0	0	0	0	0	0	0	0.000161462	0	0	0	0.000113024	0.000242193	1.61e-05	0	0	0	9.69e-05	0	0	0	0	0	0	0	0	0	0	0	0	0	0	0	0	0.00025834	0	0	0	0	0	0	0	0	0	0	0	0	0
ASV1750	0	0	0	0	0	0	0	8.07e-05	0	0	0	0	0	0	0	0	0	0	0	0	0	0	0	0	0	0	0	0	0	0	4.84e-05	0	0	0	0	0	0	0	0	0	0	0	4.84e-05	0.000387509	0	0	0	0	8.07e-05
ASV1751	0	0	0	0	0	0	0	0.000145316	0	0	0	0	0	0	0	0	0	0	0.000339071	0	8.07e-05	0	3.23e-05	8.07e-05	0	0	0	0	0	0	0	0	0	0	0	0	0	0	0	0	0	0	0	0	0	0	0	0	8.07e-05
ASV1752	0	0	0	0	0	1.61e-05	0	0	3.23e-05	0	0	0	0	0	0	0	0	0	8.07e-05	0	0	0	0	0	0	0	0	0	0	0	0	0.000403656	0.000113024	4.84e-05	0	0	1.61e-05	0	0	0	0	0	0	4.84e-05	0	0	0	0	0.00012917
ASV1753	0	0	0	0	0	0	0	0	0	0	0	0	0	0	0	0	0	0	0	0	0	0	4.84e-05	0	0	0	0	0	0	0	0	0	0	0	0	0	0	0	0	0	0.000548971	0.000226047	0	0	0	0	0	0	0.000145316
ASV1754	0	0	0	0	0	0	0	0	0	0	0	0	0	0	0	0	0	0	0	0	0	0	0	0	0	0	0	0	0	0	0	0	0	0	0	0	0	0	0	0	0	0	0	0	0	0	0	0	0
ASV1755	0	0	0	0	0	0	0	0	0	0	0	0	0	0	0	0	0	0	0	0	0	0	0	0	0	0	0	0	0	0	0	0	0	0	0	0.00106565	0	0	0	0	0	0	0	0	0	0	0	0	0
ASV1756	0	0	0	0	0	0	0	0	0	0	0	0	0	0	0	0	0	0	8.07e-05	0	0	0.000629703	0.000387509	0	0	0	0	0	0	0	0	0	0	0	0	0	0	0	0	0	0	0	0	0	0	0	0	0	0
ASV1757	0	0	0	0	0	0	0	0	0	0	0	0	0	0	0	0	0	0	0	0	0	0	0	0	0	0	0	0	0	0	0	0	0	0	0	0	0	0	0	0	0	0.00117867	0	0	0	0	0	0	0
ASV1758	0	0	0	0	0	0	0	0	0	0	0	0	0	0	0	0	0	0	0	0	0	0	0	0	0	0	0	0	0	0	0	0	0	0	0	0	0	0	0	0	6.46e-05	0	0	0	0	0	0.000936481	0	0
ASV1759	0	0	0	0	0	0	0	0.000500533	0.000419802	0.000193755	0	0	0	0	0	0	0	0	0	0	0	0	0	0	0	0	0	0	0	0	0	0	0	0	0	0	0	0	0	0	0	0	0	0	0	0	0	0	0
ASV1760	0	0	0	0	0	0	0	6.46e-05	0	0	0	0	0	0.000419802	0	0	0	0	6.46e-05	8.07e-05	0	0	0	0	0	0	0	0	0	0	0	0	0	0	0	0	0	0	0	0	0.000435948	0	0	0	0	0	0	0	0
ASV1761	0	0	0	0	0.000161462	0	0	0	0	0	0	0	0	0	0	0	0	0	0	0	0	0	0	0	0.00025834	0	0	8.07e-05	0	1.61e-05	0	0.000177608	0	0	3.23e-05	0	0	0	0	0	0	0	0	0	0	0	0	0	8.07e-05
ASV1762	0	0	0	0	0.000516679	0	0	0.000113024	0	0.000177608	0.000193755	0	0	0	0	0	0	0	0	0	0	0	0	0	0	0	0	0	0	0	0	0	0	0	0	0	0	0	0	0	0	0	0	0	0	0	0	0	0
ASV1763	0	0	0	0.000193755	0	3.23e-05	0	0	0	0	0	0	0	0	0	0	0	0	0	0	0	0	0	0	0	0	0	0	0	0	0.000548971	0	0	8.07e-05	0	0	0	0	0	0	0	0	0	0	0	0.000193755	0	0	0
ASV1764	0	0.000322924	0	0	0	0	0	0	0	0	0	0	0	0	0	0	0	0	0	0	0	0	0	0	0	0	0	3.23e-05	0	0	0	0	0	0.000339071	0	8.07e-05	0	0	0	0	0	0.000161462	0	9.69e-05	0	0	0	0	0
ASV1765	0.000113024	0	0	0	0	0	0	0.000984919	0	0	0	0	0	0	0	0	0	0	0	0	0	0	0	0	0	0	0	0	0	0	0	0	0	0	0	0	0	0	0	0	0	0	0	0	0	0	0	0	0
ASV1766	0	0	0	0	0	0	0	0	0	0	0	0	0	0	0	0	0	0	0	0	0	0	0	0	0	0	0	0	0	0.000403656	0	0	0	0	0	0	0	0	0	0	0	0.000371363	0	0	0	0	0	0	0
ASV1767	0	0	0	0	0	0	0	0	0	0	0	0	0	0	0	0	0	0	0	0	0.000888042	0	0.000177608	0	0	0	0	0	0	0	0	0	0	0	0	0	0	0	0	0	0	0	0	0	0	0	0	0	0
ASV1768	0	0	0	0	0	0	0	0	0	0	0	0	0	0	0	0	0	0	0	0	0	0	0	0	0	0	0	0.00103336	0	0	0	0	0	0	0	0	0	0	0	0	0	0	0	0	0	0	0	0	0
ASV1769	0	0	0	0	0	0	0	0.0010818	0	0	0	0	0	0	0	0	0	0	0	0	0	0	0	0	0	0	0	0	0	0	0	0	0	0	0	0	0	0	0	0	0	0	0	0	0	0	0	0	0
ASV1770	0	0	0	0	0	0.000145316	0	0	0.000274486	6.46e-05	4.84e-05	0	0	0	0	0	0	0	0	0	0	0	0	0	0	0	0	0	0	0	0	0	0	0	0	0	0	0	6.46e-05	6.46e-05	9.69e-05	0	0	6.46e-05	0	0	0	0	4.84e-05
ASV1771	0	0	0.000209901	0.000565118	0.000226047	0	0	0	0	0	0	0	0	0	0	0	0	0	0	0	0	0	0	0	0	0	0	0	0	0	0	0	0	0	0	0	0	0	0	0	0	0	0	0	0	0	0	0	0
ASV1772	0	0	0	4.84e-05	0.00012917	0.00072658	6.46e-05	0	0	0	4.84e-05	0	0	0	0	0	0	0	0	0	0	0	0	1.61e-05	0	0	0	0	0	9.69e-05	0	0	0	0	0	0	0	0	0	0	0	0	0	0	0	0	0	0	0
ASV1773	0	0	0	0	0	0	0	0	0	0	0	0	0.000355217	0	0	0	0	0	0	0	0	0	0	0	0.000678141	0	0	0	0	0	0	0	0	0	0	0	0	0	0	0	0	0	0	0	0	0	0	0	0
ASV1774	0	0.000775019	0	0	0	0	0	0	0	0	0	0	0	0	0	0	0	0	0	0	0	0	0	0	0	0	0	9.69e-05	0	0	0	0.000113024	0	0	0	0	0	0	0	0	0	0	0	0	0	0	0	3.23e-05	0
ASV1775	0.000290632	0	0	0	0	0	0	0	0	0	0	0	0	0	0	0	0	0	0	0	0	0	0	0	0	0	0	0	0	0	0	0	0	0	0	0	0	0	0	0	0	0.000452094	0	0	0	0	0	0	0
ASV1776	0	0	0.000371363	0.000209901	0.000242193	0.000177608	0	0	0	0	0	0	0	0	0	0	0	0	0	0	0	0	0	0	0	0	0	0	0	0	0	0	0	0	0	0	0	0	0	0	0	0	0	0	0	0	0	0	0
ASV1777	0	0	0	0	0.000209901	0	0	0	0	0	0	0	0	0	0	0	0.000209901	0.000274486	0	0.000177608	0	0	0	0.000177608	0	0	0	0	0	0	0	0	0	0	0	0	0	0	0	0	0	0	0	0	0	0	0	0	0
ASV1778	0	0	0	0	0	0	0	0	0.00117867	0	0	0	0	0	0	0	0	0	0	0	0	0	0	0	0	0	0	0	0	0	0	0	0	0	0	0	0	0	0	0	0	0	0	0	0	0	0	0	0
ASV1779	0	0	0	0	0	0	0	0	0	0	0	0	0	0	0	0	0	0	0	0	0	0	0	1.61e-05	0	0	0	0	0	0	0	0	0	0	0	0	0.00012917	0	0.00012917	3.23e-05	0	0.000177608	0	8.07e-05	0	9.69e-05	0	6.46e-05	0.000177608
ASV1780	0	0	0	0	0	0	0	0	0	0	0	0	0	0	0	0	0	0	0	0	0	0	0	0	0	0	0	0	0	0	0	0	0	0	0.00012917	0	0	0	0	1.61e-05	0	0	8.07e-05	0	0	0	0.000226047	0	0
ASV1781	0	0	0	0	0	0	0	0	0	0	0	0	0	0	0	0	0	0	0	0	0	0	0	0	0	0	0	0	0	8.07e-05	0	0	0	0	0	0	0	0	0	0	0	0.000403656	0	0	0	0	0	0.000484387	0
ASV1782	0	0	0	0	0	0	0	0	0	0	0	0	0	0	0	0	0	0	0	0	0	0	0	0	0	0	0	0	0	0	0	0	0	0	0	0	0	0	0	0	0	0	0	0	0.000984919	0	0	0	0
ASV1783	0	0	0	0	0	0	0	0	0	0	0	0	0.000500533	0	0	0	0	0	0	0	0	0	0	0	0.000500533	0	0	0	0	0	0	0	0	0	0	0	0	0	0	0	0	0	0	0	0	0	0	0	0
ASV1784	0	0	0	0	0	0	0	0	0	0	0	0	0.000161462	0	0	0	0	0	0	0	0	0.000661995	0	0	0.000177608	0	0	0	0	0	0	0	0	0	0	0	0	0	0	0	0	0	0	0	0	0	0	0	0
ASV1785	0	0	0	0	0	0	0	0	0	0	0	0	0	0	0	0	0	0	0	0	0	0	0	0	0	0	0	0	0	0	0	0	0	0	0	0	0	0	0	0	0	0	0	0	0	0	0	0	0
ASV1786	0.000193755	0	0	0	0	0	0	0	0	0	0	0	0.000145316	0	0	0	0	0	0	0	0	0	0	0	0	0	0	0	0	0	0	0	0	0	0	0	0	0	0	0	0	0	0	0	0	0	0	0	0.000145316
ASV1787	0	0	0	0	0	0	0	0	0	0	0	0	0	0	0	0	0	0	0	0	0	0	0	0	0	0	0	0	0	0	0	0	0	0	0	0	0	3.23e-05	0	0	0	0	0	0	0	0	0	0	8.07e-05
ASV1788	0	0	0	0	0	0	0	0	0	0	0	0	0	0	0	0	0	0	0	0	0	0	0	0	0	0	0	0	0	0	0	0	0.00103336	0	0	0	0	0	0	0	0	0	0	0	0	0	0	0	0
ASV1789	0	0	0	0	0	0	0	0	0	0	0	0	0.00012917	0.000145316	6.46e-05	0	0.00012917	0	6.46e-05	0	0	0	4.84e-05	0.000193755	0	0	0	0	0	0	0	0	0	0	0	0	0	0	0	0	0	0	0	0	0	0.000242193	0	0	0
ASV1790	0	0	0	0	0	0	0	0	0	0	0	0	0	0	0	0	0	0	0	0	0	0	0	0	0	0	0	0	0	0.000193755	0	0	0	0	0	0	0	0	0	0	0	0.00046824	0	0	0	0	0	0	0
ASV1791	0	0	0	0	0	0	0	0	0	0	0	0	0	0	0	0	0	0	0	0	0	0	0	0	0	0	0	0	0	0	0	0.000161462	0.000193755	0	0	0.000193755	0	0	0	0	4.84e-05	3.23e-05	0	0	0.000290632	0	0	0	0
ASV1792	0	0	0	0	0	0	0	0	0	0	0	0.0010818	0	0	0	0	0	0	0	0	0	0	0	0	0	0	0	0	0	0	0	0	0	0	0	0	0	0	0	0	0	0	0	0	0	0	0	0	0
ASV1793	0	0	0.000161462	0	0	0	0	0.000355217	0	0	0	0	0	0.00012917	9.69e-05	0	0	0.00012917	0	0	0	0	0	0	0	0	0	0	0	0	0	0	0.000193755	0	0	0	0	0	0	0	0	0	0	0	0	0	0	0	0
ASV1794	0	0	0	0	0	0.0010495	0	0	0	0	0	0	8.07e-05	0	0	0	0	0	0	0	0	0	0	0	0	0	0	0	0	0	0	0	0	0	0	0	0	0	0	0	0	0	0	0	0	0	0	0	0
ASV1795	0	0	0	0.00025834	0	0	0	0	0	0.000775019	0	0	0	0	0	0	0	0	0	0	0	0	0	0	0	0	0	0	0	0	0	0	0	0	0	0	0	0	0	0	0	0	0	0	0	0	0	0	0
ASV1796	3.23e-05	0	0	0.000758872	0	0	0	0	0	0.00012917	0	0	0	0	0	0	0	0	0	0	0	0	0	0	0	0	0	0	0	0	0	0	0	0	0	0	0	0	0	0	0	0	0	0	0	0	0	0	0
ASV1797	0	0	0.000226047	0.000500533	0.000193755	0	0	0	0	0	0	0	0	0	0	0	0	0	0	0	0	0	0	0	0	0	0	0	0	0	0	0	0	0	0	0	0	0	0	0	0	0	0	0	0	0	0	0	0
ASV1798	0	0	0	0	0.000629703	0	0	0	0	0	0	0	0	0	0	0	0	0	0	0	0	0	0	0	0	0	0	0	0	0	0	0	0	0	0	0	0	0	0	0	0	0	0	0	0	0.000355217	0	0	0
ASV1799	0	0	0	0	0	0.00111409	0	0	0	0	0	0	0	0	0	0	0	0	0	0	0	0	0	0	0	0	0	0	0	0	0	0	0	0	0	0	0	0	0	0	0	0	0	0	0	0	0	0	0
ASV1800	0	0	0	0	0	0	0	0.00101721	0	0	0	0	0	0	0	0	0	0	0	0	0	0	0	0	0	0	0	0	0	0	0	0	0	0	0	0	0	0	0	0	0	0	0	0	0	0	0	0	0
ASV1801	0	0	0	0	0	0	0	0	0	0	0	0	0	0	0	0	0	0	0	0	0	0	0	0	0	0	0	0	0	0	0	0	0	0	0	0	0	0	0	0	8.07e-05	0	0	0	0	0	0	0	0
ASV1802	0	0	0	0	0	0	0	0	0	0	0	0	0	0	0	0	0	0	0	0	0	0	0	0	0	0	0	0	0	0	0	0	0	0	0	0	0	0	0	0	0	0.00106565	0	0	0	0	0	0	0
ASV1803	0	0	0	0	0	0	0	0	0	0	0	0	0	0	0	0	0	0	0	0	0	0	0	0	0	0	0	0	0	0	0	0	0	0	0	0	0	0	0	0	0	0	0	0.000339071	0	9.69e-05	0	0	0
ASV1804	0	0	0	0	0	0	0	0	0	0	0	0	0	0	0	0	0	0	0	0	0	0	0	0	0	0	0	0	0	0	0	0	0	0	0	0	0	0	0	0	0	0	0	0	0.000387509	0	0	0	0
ASV1805	0	0	0	0	0	0	0	0	0	0	0	0	0	0	0	0	0	0	0	0	0	0	0	0.000306778	0	0	0	0	0	0.00059741	0	0	0	0	0	0	0	0	0	0	0	0	0	0	0	0	0	0	0
ASV1806	0	0	0	0	0	0	0	0	0	0	0	0	0	0	0	0	0	0	0	0	0	0	0	0	0	0	0	0	0	0	0	0	0	0	0	0	0	0	0	0	0	0	0	0	0	0	0	0	0
ASV1807	0	0	0	0	0	0	0	0	0	0	0	0	0	0	0	0	0	0	0	0	0	0	0	0	0	0	0	0	0	0	0	0	0	0	0	0	0	0	0.000839603	0	0	0	0	0	0	0	0	0	0
ASV1808	0	0	0	0	0	0	0	0	0	0	0	0	0	0	0	0	0	0	0	0	0	0	0	0	0	0	0	0	0	0	0	0	0	0	0	0	0	0.000839603	0	0	0	0	0	0	0	0	0	0	0
ASV1809	0	0	0	0	0	0	0	0	0	0	0	0.000419802	0	0.000613556	0	0	0	0	0	0	0	0	0	0	0	0	0	0	0	0	0	0	0	0	0	0	0	0	0	0	0	0	0	0	0	0	0	0	0
ASV1810	0	0	0	0	0	0	0	0	0	0.00012917	0.000145316	0	0	0	6.46e-05	0	0	0.000113024	0	0	0.00025834	0	0	0.000113024	0	0	0	0	0	0	0	0.000161462	0	0	0	1.61e-05	0	0	0	0	0	0	0	0	0	0	0	0	0
ASV1811	0	0	0	0	0	0	0	0	0	0	0	0	0	0	0	0	0	0	0	0	0	0	0	0	0	0	0	0	0	0	0	0	0	0	0	0	0	0	0	0	9.69e-05	0	0	0	0	0	0.000823457	0	0
ASV1812	0	0	0	0	0	0	0	0	0	0	0	0	0	0	0.000775019	0	0	0	0	0	0	0	0	0	0	0	0	0	0	0	0	0	0	0	0	0	0	0	0	0	0	0	0	0	0	0	0	0.00025834	0
ASV1813	0	0	0	0	0	0	0	0	0	0	0.000968773	0	0	0	0	0	0	0	0	0	0	0	0	0	0	0	0	0	0	0	0	0	0	0	0	0	0	0	0	0	0	0	0	0	0	0	0	0	0
ASV1814	0	0	0	0.000888042	0	0	0	0	0	0	0	0	0	0	0	0	0	0	0	0	0	0	0	0	0	0	0	0	0	0	0	0	0	0	0	0	0	0	0	0	0	0	0	0	0	0	0	0	0
ASV1815	0	0	0	0	0	0.000387509	0	0	0.000355217	0.000145316	0	0	0	0	0	0	0	0	0	0	0	0	0	0	0	0	0	0	0	0	0	0.000177608	0	0	0	0	0	0	0	0	0	0	0	0	0	0	0	0	0
ASV1816	0	0	0	0.000371363	0	0	0	0	0	0.000355217	0	0	0	0	0	0	0	0	0	0	0	0	0	0	0	0	0	0	0	0	0	0	0	0	0	0	0	0	0	0	0	0	0	0	0	0	0	0	0
ASV1817	0	0	0.000904188	0	0	0	0	0	0	0	0	0	0	0	0	0	0	0	0	0	0	0	0	0	0	0	0	0	0	0	0	0	0	0	0	0	0	0	0	0	0	0	0	0	0	0	0	0	0
ASV1818	4.84e-05	0	0	0	0	0	0	0.000242193	0	0	0	0	0	0	0	0	0	0	0	0	0	0	0	0	0	0	0	0	0	0	0	0	0	0	0	0	0	4.84e-05	0	0	0	0	0	0	0	0	0.000516679	0	0
ASV1819	0	0	0	0	0.000548971	0	0	0	0	0	0	0	0	0	0	4.84e-05	0	0	0	0	0.000435948	0	0	0	0	0	0	0	0	0	0	0	0	0	0	0	0	0	0	0	0	0	0	0	0	0	0	0	0
ASV1820	0	0	0	0	0	0	0	0	0	0	0	0	0	0	0	0	0	0	0	0	0	0	0	0	0	0	0	0	0	0	0	0.000145316	0	0	0	0	0	0.000177608	0	0	0	0	0	0	0	0.000435948	0.000161462	0	0
ASV1821	0	0	0	0	0	0	0	0	0	0	0	0	0	0	0	0	0	0	0	0	0	0	0	0	0	0	0	0.000936481	0	0	0	0	0	0	0	0	0	0	0	0	0	0	0	0	0	0	0	0	0
ASV1822	0	0	0	0	0	0	0	0	0	0	0	0	0	0	0	0	0	0	0	0	0	0	0	0	0	0	0	0	0	0	0	0	0	0.000161462	0	0	0	0	0	0	0	0	0	0	0	0.000322924	0	0	0
ASV1823	0	0	0	0	0	0	0	0	0	0	0	0	0	0	0	0	0	0	0	0	0	0	3.23e-05	0	0	4.84e-05	0	0	0	0	0	0	0	0	0	0.000113024	0	0	0	0	0.000161462	0	0	0.00012917	0	0	0	0.000177608	0
ASV1824	0	0	0	0	0	0	0	0	0	0	0	0	0	0	0	0	0	0	0	0	0	0	0	0	0	0	0	0	0	0	0	0	0	0	0	0	0	0	0	0	0.0010495	0	0	0	0	0	0	0	0
ASV1825	0	0	0	0	0	0.00106565	0	0	0	0	0	0	0	0	0	0	0	0	0	0	0	0	0	0	0	0	0	0	0	0	0	0	0	0	0	0	0	0	0	0	0	0	0	0	0	0	0	0	0
ASV1826	0	0	0	0	0	6.46e-05	0	0	0	0	0.000226047	0	0	0	0	0	0	0	0	0.000613556	0	0	0	0	0	0	0	0	0	0	0	0	0	0	0	0	0	0	0	0	0	0	0	0	0	0	0	0	0
ASV1827	0	0	0	0	0	0.000322924	0	0	0	0	3.23e-05	0.000177608	0	0	0	0	0	0	0	0	0	0	0	0	0	0	0	0	0	0	0	0	0	0	0	0	0	0	0.000452094	0	0	0	0	1.61e-05	0	0	0	0	0
ASV1828	0	0	0	0	0	0.000581264	0	0	0	0	0	0	0	0	0	0	0	0	0	0	0	0	0	0	0	0	0	0	0	0	0	0	0	0	0	0	0	0	0.000419802	0	0	0	0	0	0	0	0	0	0
ASV1829	0	0	0	0	0.00012917	0	0	0	0	0	0.000839603	0	0	0	0	0	0	0	0	0	0	0	0	0	0	0	0	0	0	0	0	0	0	0	0	0	0	0	0	0	0	0	0	0	0	0	0	0	0
ASV1830	0.000209901	0	0	0	0	0	0	0	0	0	0	0	0	0	0	0	0	0	0	0	0	0	0	0.000452094	0	0	0	0	0	0	0	0	0	0	0.000371363	0	0	0	0	0	0	0	0	0	0	0	0	0	0
ASV1831	0	0	0	0	0	0	0	0	0	0	0	0	0	0	0	0	0	0	0	0	0	0	0	0	0	0	0	0	0	0	0	0	0	0	0	0	0	0	0.000904188	0	0	0	0	0	0	0	0	0	0
ASV1832	0	0	0	0	0	0	0	0	0	0	0	0	0	0	0	0	0	0	0	0	0	0	0	0	0	0	0	0	0	0	0	0	0	0	0	0	0	0	0	0	0	0	0	0	0	0	0	0	0
ASV1833	0	0	0	0	0	0	0	0	0	0	0	0	0	0	0	0	0	0	0	0	0	0	0	0	0	0	0	0.000936481	0	0	0	0	0	0	0	0	0	0	0	0	0	0	0	0	0	0	0	0	0
ASV1834	0	0	0	0	0	0	0	0	0	0	0	0	0	0	0	0	0	0	0	0	0	0	0	0	0	0	0	0	0	0	0	0	0	0	0	0	0	0	0	0	0	0	0	0	0	0	6.46e-05	0	0
ASV1835	0	0	0	0	0	0	0	0	0	0	0	0	0	0	0	0	0	0	0	0	0	0	0	0	0	0	0	0	0	0	0	0	0	0.000839603	0	0	0	0	0	0	0	0	0	0	0	0.000113024	0	0	0
ASV1836	0	0.000920335	0	0	0	0	0	0	0	0	0	0	0	0	0	0	0	0	0	0	0	0	0	0	0	0	0	0	0	0	0	0	0	0	0	0	0	0	0	0	0	0	0	0	0	0	0	0	0
ASV1837	0	0	0	0	0	0	0	0	0	9.69e-05	0	0	0	0	0	0.000145316	0	0	0	0	0	0	0	0.000661995	6.46e-05	0	0	0	0	0	0	0	0	0	0	0	0	0	0	0	0	0	0	0	0	0	0	0	0
ASV1838	0	0	0	0	0	0.000161462	0	0	0	0	0	0	0	0	0	0	0	0	3.23e-05	0	0.000452094	0	0	0	0	0	0	0	0	0	0	0	0	0	0	0	0	0	0	0	0	0	0	0	0	0	0	9.69e-05	0
ASV1839	0	0	0	0	0.000242193	0.000209901	0	0	0	0	0	0	0	0	0	0	0	0	0	0.000161462	0	0	0	0	0	0	0	0	0	0	0	0	0	0	6.46e-05	0.000371363	0	0	0	0	0	0	0	0	0	0	0	0	0
ASV1840	0	0	0	0.000871896	0	0	0	0	0	0	0	0	0	0	0	0	0	0	0	0	0	0	0	0	0	0	0	0	0	0	0	0	0	0	0	0	0	0	0	0	0	0	0	0	0	0	0	0	0
ASV1841	0	0	0.000645849	0	0	0.000290632	0	0	0	0	0	0	0	0	0	0	0	0	0	0	0	0	0	0	0	0	0	0	0	0	0	0	0	0	0	0	0	0	0	0	0	0	0	0	0	0	0	0	0
ASV1842	0	0	0	0	0	0	0	0	0	0	0	0	0	0	0	0	0	0	0	0	0	0	0	0	0	0	0	0	0	0	0	3.23e-05	0.000145316	0	6.46e-05	0	0	0	0	0	4.84e-05	0	0	0	0.000290632	0	0	0	0
ASV1843	0	0	0	0	0	0	0	0	0	0	0	0	0	0	0	0	0	0	0	0	0	0	0	0	0	0	0	0	0	0	0	0	0	0	0	0	0	0	0	0	0	0	0	0	0	0	0	0	0
ASV1844	0	0	0	0	0	0	0	0	0	0	0	0	0	0	0	0	0	0	0	0	0	0	0	0	0	0	0	0	0	0	0	0	0	0	0	0	0	0	0	0	0	0	0	0	0	0	0	0	0.000936481
ASV1845	0	0	0	0	0	0	0	0	0	0	0	0	0	0	0	0	0	0	3.23e-05	0.000226047	0.000339071	0.000387509	0	0	0	0	0	0	0	0	0	0	0	0	0	0	0	0	0	0	0	0	0	0	0	0	0	0	0
ASV1846	0	0	0	0	0	0	0	0	0	0	0	0	0	0	0	0	0	0	0	0	0	0	0	0	0	0	0	0	0	3.23e-05	0	0	0	0	0	0	0	0	0	0	0	0.00101721	0	0	0	0	0	0	0
ASV1847	0	0	0	0	0	0	0	0	0	0	0	0	0	0	0	0	0	0	0	0	0	0	0	0	0	0.000177608	0	0	4.84e-05	0	0	0	0	0	0	0	0	0	0	0	0	0	0	0	0	0	0	0	0
ASV1848	0	0	0	0	0	0	0	0	0	0	0	0	0	0	0	0	0	0	0	0	0	0	0	0	0	0	0	0	0	0	0	0	0	0	0	0	0	0	0	0.000936481	0	0	0	0	0	0	0	0	0
ASV1849	0	0	0	0.000290632	0	0	0	0	0	0	0	0	0	0	0	0	0	0	0.00012917	0	0	0	0	0	0	0	0	0	0	0	0.000274486	0	0	0	0	3.23e-05	0	0	0	0	0	0	0	0	0	0	0	0	9.69e-05
ASV1850	8.07e-05	0.000161462	0	8.07e-05	1.61e-05	0	8.07e-05	0	0	0.000274486	0	0	0	0	0	0	0	0	0	0	0	0	4.84e-05	0	0.000177608	0	0	0	0	0	0	0	0	0	0	0	0	0	0	0	0	0	0	0	0	0	0	0	0
ASV1851	0	0.00059741	0	0	0	0	0	0	0	0	0	0	0	0	0	0	0	0	0	0	0	0	0	0	0	0	0	0	0	0	0	0	0	0	0	0	0	0	0	0	0	0.000339071	0	0	0	0	0	0	0
ASV1852	6.46e-05	0	0	0	0	0	0	0	0	0.00012917	0	0	0	0	0	0	8.07e-05	0	0	0	8.07e-05	0	0	0	0	0	0	0	0	0	0	0	0	0	0.000177608	0	0	0	9.69e-05	0	0	0	0	0	0	0	0	0	0.000113024
ASV1853	0	0	0	0	0	0	0	0.00025834	0.000209901	0.000226047	0.000306778	0	0	0	0	0	0	0	0	0	0	0	0	0	0	0	0	0	0	0	0	0	0	0	0	0	0	0	0	0	0	0	0	0	0	0	0	0	0
ASV1854	0	0	0	0	0	0	0	0	0	0	0	0	0.000322924	0	0	0	0	0	0	0	0	0	0	0	0.000484387	0	0	0.000145316	0	0	0	0	0	0	0	0	0	0	0	0	0	0	0	0	0	0	0	0	0
ASV1855	0	0	0	0	0	0	0	0	0	0	0	0	0	0	0	0	0	0	0	0	0	0	0	0	0	0	0	0	0	0	0	0	0	0	0	0	0	0	0	0	0	0	0	0	0	0	0	0	0
ASV1856	0	0	0	0	0	0	0	0	0	0	0	0	0	0	0	0	0	0	0	0	0	0	0	0	0	0	0	0.000904188	0	0	0	0	0	0	0	0	0	0	0	0	0	0	0	0	0	0	0	0	0
ASV1857	0	0	0	0	0	0	0	0	0	0	0	0	0	0	0	0	0	0	0.000839603	0	0	0	0	0	0	0	0	0	0	0	0	0	0	0	0	0	0	0	0	0	0	0	0	0	0	0	0	0	0
ASV1858	0	0	0	0	0	0	0	0	0	0	0	0	0	0	0	0	0.000145316	0	0	0	0	0	0	0	0	0	0	0	0.000904188	0	0	0	0	0	0	0	0	0	0	0	0	0	0	0	0	0	0	0	0
ASV1859	0	0	0	0	0	0	0	0	0	0	0	0	0	0	0	0	0	0	0	0	0	0	0	0	6.46e-05	0	0.000193755	0	0	0	0	0	0.000613556	0	0	0	0	0	0	0	0	0	0	0	4.84e-05	0	0	0	0
ASV1860	0	0	0	0	0	0	0	0	0	0	0	0	0	0	0	0	0	0	0	0	0	0	0	0	0	0	0	0	0	0	0	0	0	0	0	0	0	0	0	0	0	0	0	0.000904188	0	0	0	0	0
ASV1861	0	0	0	0	0	0	0	0	0	0	0.000581264	0.000403656	0	0	0	0	0	0	0	0	0	0	0	0	0	0	0	0	0	0	0	0	0	0	0	0	0	0	0	0	0	0	0	0	0	0	0	0	0
ASV1862	0	0	0	0	0	0	0	0	0.000661995	0	0	0.000242193	0	0	0	0	0	0	0	0	0	0	0	0	0	0	0	0	0	0	0	9.69e-05	0	0	0	0	0	0	0	0	0	0	0	0	0	0	0	0	0
ASV1863	0	0	0	0	0	0	9.69e-05	0	0	0	0	0	0	0	0	0	0	0.00012917	0	0	0	0	0	0	0	3.23e-05	0.000565118	0	0	0	0	0	1.61e-05	0	3.23e-05	0	0	0	0	0	0	0	0	0	0	0	0	0	0
ASV1864	0	0	0	0.000661995	0	0	0	0	0	0.000209901	0	0	0	0	0	0	0	0	0	0	0	0	0	0	0	0	0	0	0	0	0	0	0	0	0	0	0	0	0	0	0	0	0	0	0	0	0	0	0
ASV1865	0	0	0.000613556	0	0	0	0	0	0	0	0	0.000274486	0	0	0	0	0	0	0	0	0	0	0	0	0	0	0	0	0	0	0	0	0	0	0	0	0	0	0	0	0	0	0	0	0	0	0	0	0
ASV1866	0	0	0	0	0	0	0	0	0	0	0	0	0	0	0	0	0	0	0	0	0	0	0	0	0	0	0	0	0	0	0	0	0	0	0	0	0	0	0	0	0.000177608	0	0	0	1.61e-05	0	0.000645849	0	0
ASV1867	0	0	0	0	0	0	0	0	0	0	0	0	0	0	0	0	0	0	0	0	0	0	0	0	0	0	0	0	0	0	0	0	0	0	0	0.000888042	0	0	0	0	0	0	0	0	0	0	0	0	0
ASV1868	0	0	0	0	0	0	0	0	0	0	0	0	0	0	0	0	0	0	0	0	0	0	0	0	0	0	0	0	0	0.000435948	0	0	0	0	0	0	0	0	0	0	0	0	0	0	0	0	0	0	0
ASV1869	0	0	0	0	0	0	0	0	0	0	0	0	0	0	0	0	0	0	0.000500533	0	0	0	0.000371363	0	0	0	0	0	0	0	0	0	0	0	0	0	0	0	0	0	0	0	0	0	0	0	0	0	0
ASV1870	0	0	0	0	0	0	0	0	0	0	0	0	0	0	0	0.000823457	0	0	0	0	0	0	0	0	0	0	0	0	0	0	0	0	0	0	0	0	0	0	0	0	0	0	0	0	0	0	0	0	0
ASV1871	0	0	0	0	0	0	0	0	0	0	0	0	0	0	0	0	0	0	0	0	0	0	4.84e-05	0	0	0	0	0	0	0	0	0	9.69e-05	0	0	0	0	0	0	0	0	0	0	0	0.00025834	0	0	0	0
ASV1872	0	0	0	0	0	0	0	0	0	0	0	0	0	0	0	0.00012917	0	0	0	0	0	0	0	0	0	0	0	0	0	0.000177608	0	0	0	0	0	0	0	0	0	0	0	0.000306778	0	0	0	0	0	0	0
ASV1873	0	1.61e-05	0	6.46e-05	0	0	0	0	0	0.000145316	1.61e-05	0	0	0	0	4.84e-05	0	0	0	0	8.07e-05	3.23e-05	0	0	0	0	0	0	0	0	0	0	0	0	0	0	0	0.000193755	4.84e-05	0	4.84e-05	0	0	0	0	0	0	3.23e-05	6.46e-05
ASV1874	0	0	0	0	0	0	0	0	0	0	0	0	0	0	0	0	0	0	0	0	0	0	0	0	0	0	0	0	0	0	0	0	0	0	0	0	0	0	0	0	0.000984919	0	0	0	0	0	0	0	0
ASV1875	0	0	0	0	0.000548971	0	0	0	0	0	0.000322924	0	0	0	0	0	0	0	0	0	0	0	0	0	0	0	0	0	0	0	0	0	0	0	0	0	9.69e-05	0	0	0	0	0	0	0	0	0	0	0	0
ASV1876	0	0	0	0	0.000161462	0	0	0	0	0.000193755	0.000581264	0	0	0	0	0	0	0	0	0	0	0	0	0	0	0	0	0	0	0	0	0	0	0	0	0	0	0	0	0	0	0	0	0	0	0	0	0	0
ASV1877	0	0.000339071	0	0	0	0	0	0	0	0.000274486	0	0	0	0	0	0	0	0	0	0	0	0	0	0	0.000161462	0	0	0	0	0	0	0	0	0	0	0	0	0	0	0	0	0	0	0	0	0	0	0	0.00012917
ASV1878	0	0.000484387	0	0	0	0	0.000403656	0	0	0	0	0	0	0	0	0	0	0	0	0	0	0	0	0	0	0	0	0	0	0	0	0	0	0	0	0	0	0	0	0	0	0	0	0	0	0	0	0	0
ASV1879	0.000516679	8.07e-05	0	0	0	0	0	0	0	0	0	0	0	0.000177608	0.000177608	0	0	0	0	0	0	0	0	0	0	0	0	0	0	0	0	0	0	0	0	0	0	0	0	0	0	0	0	0	0	0	0	0	0
ASV1880	0	0	0	0	0	0	0	0	0	0	0	0	0	0	0	0	0	0	0	0	0	0	0	0	0	0	0	0	0	0	0	0	0	0	0	0	0	0	0	0	0	0	0	0	0	0	0	0	0
ASV1881	0	0	0	0	0	0	0	0	0	0	0	0	0	0	0	0	0	0	0	0	0	0	0	0	0	0	0	0	0	0	0	0	0	0	0	0	0	0	0	0	0	0	0	0	0	0	0	0	0
ASV1882	0	0	0	0	0	0	0	0	0	0	0	0	0	0	0	0	0	0	0	0	0	0	0	0	0	0	0	0	0	0	0	0.000936481	0	0	0	0	0	0	0	0	0	0	0	0	0	0	0	0	0
ASV1883	0	0	0	0	0	0	0	0	0	0	0	0	0	0	0	0	0	0	0	0	0	0	0	0	0	0	0	0	0	0	0	0	0	0	0	0	0	0	0	0	0	0.000968773	0	0	0	0	0	0	0
ASV1884	0	0	0	0	0	0	0	0	0	0	0	0	0	0	0	0	0	0	0	0	0	0	0	0	0	0	0	0.000871896	0	0	0	0	0	0	0	0	0	0	0	0	0	0	0	0	0	0	0	0	0
ASV1885	0	0	0	0	0	0	0	0	0	0	0	0	0	0	0	0	0.000435948	0	0	0	0	0	0	0	0	0	0	0	0.000581264	0	0	0	0	0	0	0	0	0	0	0	0	0	0	0	0	0	0	0	0
ASV1886	0	0	0	0	0	0	0	0	0	0	0	0	0	0	0	0	0.000871896	0	0	0	0	0	0	0	0	0	0	0	0.00012917	0	0	0	0	0	0	0	0	0	0	0	0	0	0	0	0	0	0	0	0
ASV1887	0	0	0	0	0	0	0	0	0	0	0	0	0	0	0	0	0	0	0	0	0	0	0	0	0	0	0	0	0	0	0	0	0	0	0.000500533	0	0	0	0	0	0	0	0	0.000145316	0	0.000113024	0	0	0
ASV1888	0	0	0	0	0	0	0	0	0	0	0	0	0	0	0	0	0	0	0	0	0	0	0	0	0	0	0	0	0	0.000403656	0	0	0	0	0	0.000435948	0	0	0	0	0	0	0	0	0	0	0	0	0
ASV1889	0	0	0	0	0	0	0	0	0	0	0	0	0	0	0	0	0	0	0	0	0	0	0.000920335	0	0	0	0	0	0	0	0	0	0	0	0	0	0	0	4.84e-05	0	0	0	0	0	0	0	0	0	0
ASV1890	0	0	0	0	0	0	0	0	0.00103336	0	0	0	0	0	0	0	0	0	0	0	0	0	0	0	0	0	0	0	0	0	0	0	0	0	0	0	0	0	0	0	0	0	0	0	0	0	0	0	0
ASV1891	0	0	0	0	0	0	0	0.00072658	9.69e-05	0	0.00012917	0	0	0	0	0	0	0	0	0	0	0	0	0	0	0	0	0	0	0	0	0	0	0	0	0	0	0	0	0	0	0	0	0	0	0	0	0	0
ASV1892	0	0	0	0	0	0.000758872	0	0	0	0	0	0.000242193	0	0	0	0	0	0	0	0	0	0	0	0	0	0	0	0	0	0	0	0	0	0	0	0	0	0	0	0	0	0	0	0	0	0	0	0	0
ASV1893	0	0	0.000274486	0	0	0	0	0	0.000694287	0	0	0	0	0	0	0	0	0	0	0	0	0	0	0	0	0	0	0	0	0	0	0	0	0	0	0	0	0	0	0	0	0	0	0	0	0	0	0	0
ASV1894	0	0	0.000193755	0	0	0	0	0	0.000775019	0	0	0	0	0	0	0	0	0	0	0	0	0	0	0	0	0	0	0	0	0	0	0	0	0	0	0	0	0	0	0	0	0	0	0	0	0	0	0	0
ASV1895	0	0	0.000290632	0	0	0	0	0	0.000516679	0	0	0	0	0	0	0	0	0	0	0	0	0	0	0	0	0	8.07e-05	0	0	0	0	0	0	6.46e-05	0	0	0	0	0	0	0	0	0	0	0	0	0	0	0
ASV1896	0	0	0	0	0	0	0	0	0.00025834	0.000710434	0	0	0	0	0	0	0	0	0	0	0	0	0	0	0	0	0	0	0	0	0	0	0	0	0	0	0	0	0	0	0	0	0	0	0	0	0	0	0
ASV1897	0	0	0	0	0	0	0	0	0	0	0	0	0	0	0	0	0	0	0	0	0	0	0	0	0	0	0	0	0	0	0	0	0	0	0.00012917	0	0	0	0	0	0.000387509	0.000419802	0	0	0	0	0	0	0
ASV1898	0	0	0	0	0	0	0	0	0	0	0	0	0	0	0	0	0	0	0	0	0	0	0	0	0	0	0	0	0	0	0	0	0	0	0	0	0	0	0	0	0	0	0	0	0	0	0	0	0
ASV1899	0	0	0	0	0	0	0	0	0	0	0	0	0	0	0	0	0	0	0	0	0	0	0	0.000145316	0	0	0	0	0	0.000645849	0	0	0	0	0	0	0	0	0	0	0	0	0	0	0	0	0	0	0
ASV1900	0	0	0	0	0	0	0	0	0	0	0	0	0	0	0	0	0	0	0	0.000807311	0	0	0	0	0	0	0	0	0	0	0	0	0	0	0	0	0	0	0	0	0	0	0	0	0	0	0	0	0
ASV1901	0	0	0	0	0	0	0	0	0	0	0	0	0	0	0	0	0	0	0.000565118	0.000209901	3.23e-05	0	0	0	0	0	0	0	0	0	0	0	0	0	0	0	0	0	0	0	0	0	0	0	0	0	0	0	0
ASV1902	0	0	0	0	0	0	0	0	0	0	0	0	0	0	0	0	0.000710434	0	0	0	0	0	0.000242193	0	0	0	0	0	0	0	0	0	0	0	0	0	0	0	0	0	0	0	0	0	0	0	0	0	0
ASV1903	0	0	0	0	0	0	0	0	0	0	0	0	0	0.000645849	0	0	0	0	0	1.61e-05	0	0	0	0	0	0.000209901	0	0	0	0	0	0	0	0	0	0	0	0	0	0	0	0	0	0	0	0	0	0	0
ASV1904	0	0	0	0	0	0	0	0	0	0	0	0	0	0	0	0	0	0	0	0	0	0	0	0	0	0	6.46e-05	0	0	0	0	3.23e-05	0.000581264	0.000177608	0	0	0	0	0	0	0	0	0	0	0	0	0	0	0
ASV1905	0	0	0	0	0	0	0	0	0	0	0	0	0	0	0	0	0	0	0	0	0	0	0	0.000177608	0	0	0	0	4.84e-05	0	0	0	0	0	0	0.000161462	0	0	0	6.46e-05	0	0	0	0	0	0	0	0	0
ASV1906	0	0	0	0	0	0	0	0	0	0	0.000532825	0	0	0	0	0	0	0	0.00012917	0	0	0	0.000226047	0	0	0	0	0	0	0	0	0	0	0	0	0	0	0	0	0	0	0	0	0	0	0	0	0	0
ASV1907	0	0	0	0	0	0	0	0	0	0.000936481	0	0	0	0	0	0	0	0	0	0	0	0	0	0	0	0	0	0	0	0	0	0	0	0	0	0	0	0	0	0	0	0	0	0	0	0	0	0	0
ASV1908	0	0	0	0	0	0	0	0	0	0.000306778	0	0	0	0	0	0	0	0	0	0	0	0	0	0	0	0	0	0	0	0	0	0	0	0	0	0	0	0	0	0	0	0	3.23e-05	0	0	0	0	0	0
ASV1909	0	0	0	0	0	0	4.84e-05	0	0	0	0	0	0	1.61e-05	0	0	0	0	0	0	0	0	0	0	0	0	0	0	0	0	0	0.00046824	0	0	0	0	0	0	0	0	0	0	0	0	0	0.000113024	0	0.000113024	6.46e-05
ASV1910	0	0	0.000484387	0	0	0	0	0	0	0	0	0	0	0	0	0	0	0	0	0	0	0	0	0	0	0	0	0	0	0	0	0	0	0	0	0	0	0	0	0	0	0	0	0	0	0	0	0	0
ASV1911	0.000145316	0	0	0	0	0	0	0	0	0.000322924	0	0	0	0	0	0	0	0	0	0	0	0	0	0	0	0	0	0.000274486	0	3.23e-05	0.00012917	0	0	0	0	0	0	0	0	0	0	0	0	0	0	0	0	0	0
ASV1912	0	0	3.23e-05	0	0	0	0	0	0	0	0	0	0	0	0	0	0	0	0	0	0	0	0	0	0	0	0	0	0	0	0	0	0	0	0.000904188	0	0	0	0	0	0	0	0	0	0	0	0	0	0
ASV1913	0	0	0	0	0	0	0	0	0	0	0	0	0	0	0	0	0	0	0	0	0	0	0	0	0	0	0	0	0	0	0	0	0	0	0	0	0	0	0	0	0	0	0	0	0	0	0	0	0
ASV1914	0	0	0	0	0	0	0	0	0	0	0	0	0	0	0	0	0	0	0	0	0	0	0	0	0	0	0	0	0	0	0	0	0	0	0	0	0	0	0	0	0	0	0	0	0	0	0	0	0
ASV1915	0	0	0	0	0	0	0	0	0	0	0	0	0	0	0	0	0	0	0	0	0	0	0.000904188	0	0	0	0	0	0	0	0	0	0	0	0	0	0	0	0	0	0	0	0	0	0	0	0	0	0
ASV1916	0	0	0	0	0	0	0	0	0	0	0	0	0	0	0	0	0	0	1.61e-05	1.61e-05	8.07e-05	0.000565118	0.000161462	0	0	0	0	0	0	0	0	0	0	0	0	0	0	0	0	0	0	0	0	0	0	0	0	0	0
ASV1917	0	0	0	0	0	0	0	0	0	0	0	0	0	0	0	0	0	0	0	0	0	0	0	0	0	0	0	0	0	0	0	0	0	0	0	0	0	0	0	0	0	0	0.00085575	0	0	0	0	0	0
ASV1918	0	0	0	0	0	0	0	0	0	0	0	0	0	0	0	0	0	0	0	0	0	0	0	0	0	0	0	0	0	0	0	0	0	0	0	0	0	0	0	0	0	0.000952627	0	0	0	0	0	0	0
ASV1919	0	0	0	0	0	0	0	0	0	0	0	0	0	0	0	0	0	0	0	0	0	0	0	0	0	0	0	0	0	0	0	0	0	0	0	0	0	0	0	0	0	0.000936481	0	0	0	0	0	0	0
ASV1920	0	0	0	0	0	0	0	0	0	4.84e-05	0	0	0	0	0	0	6.46e-05	0	0	0	0	0	0	0	0.00012917	0	0	0	0	0	0	0	0	0	0	0	0	0	0	0	0	0	0	0	0	0	0	0.000645849	0
ASV1921	0	0	0	0	0	0	0	0	0.000984919	0	0	1.61e-05	0	0	0	0	0	0	0	0	0	0	0	0	0	0	0	0	0	0	0	0	0	0	0	0	0	0	0	0	0	0	0	0	0	0	0	0	0
ASV1922	0	0	0	0	0	0	0	0.000161462	0	0	0	0	0	0	0	0	0	0	0	0	0.000290632	0	0	0	0	0	0	0.000419802	0	0	0	0	0	0	0	0	0	0	0	0	0	0	0	0	0	0	0	0	0
ASV1923	0	0	0	0	0	0.000548971	0	0	0	0	0	0	0	0	0	0	0	0	0	0	0	0	0	0	0	0	0	0	0	0	0	0	0	0	0	0	0	0	0	0	0	0	0	0	0	0	0	0	0
ASV1924	0	0	0	0	0	0.000968773	0	0	0	0	0	0	0	0	0	0	0	0	0	0	0	0	0	0	0	0	0	0	0	0	0	0	0	0	0	0	0	0	0	0	0	0	0	0	0	0	0	0	0
ASV1925	0	0	0	0	6.46e-05	0	0	0	0	0	0.000710434	0	0	0	0	0	0	0	0	0	0	0	0	8.07e-05	0	0	0	0	0	0	0	0	0	0	0	0	0	0	0	0	0	0	0	0	0	0	0	0	0
ASV1926	0	0	0	0	0	0	0	0	0	0	0	0	0	0	0	0.000775019	0	0	0	0	0	0	0	0	0	0	0	0	0	0	0	0	0	0	0	0	0	0	0	0	0	0	0	0	0	0	0	0	0
ASV1927	0	0	0	0	0	0	0	0	0	0	0	0	0	0	0	0.000193755	0.000419802	0	0	0	0	0	0	0	0	0	0	0	0.000339071	0	0	0	0	0	0	0	0	0	0	0	0	0	0	0	0	0	0	0	0
ASV1928	0	0	0	0	0	0	0	0	0	0	0	0	0	0.000645849	0	0	0	0	0	0	0	4.84e-05	6.46e-05	0	0	0	0	0	0	0	0	0	0	0	0	0	0	0	0	0	0	0	0	0	0	0	0	0	0.000161462
ASV1929	0	0	0	0	0	0	0	0	0	0	0	0	0.000823457	0	0	0	0	0	0	0	0	0	0	0	0	0	0	0	0	0	0	0	0	0	0	0	0	0	0	0	0	0	0	0	0	0	0	0	0
ASV1930	0	0	0	0	0	0	0	0	0	0	0	0.00085575	0	0	0	0	0	0	0	0	0	0	0	0	0	0	0	0	0	0	0	0	0	0	4.84e-05	0	0	0	0	0	0	0	0	0	0	0	0	0	0
ASV1931	0	0	0	0	0	0	0	0	0	0	0	0	0	0	0	0	8.07e-05	0	0	0	0	0	0	0	0	0	0.00012917	8.07e-05	0.000193755	0	0	0	0.000161462	0	0	0	0	0	0	0	0	0	0	8.07e-05	0	0	0	0	0
ASV1932	0	0	0	0	0	0	0	0	0	0	0	0	0	0	0	0	0	0	0	0	0	0	0	0	0	0	0	0	0	0	0	0	0	0	0	0	0	0	0	0	0	0	0	0.000839603	0	0	0	0	0
ASV1933	0	0	0	0	0	0	0	0	0	0	0	0	0	0	0	0	0	0	0	0	0	0.000274486	0	0	0	0	0	0	0	0	0	0	0	0	0	0	0	0.000387509	9.69e-05	0	0	0	0	0	0	0	0	0	0
ASV1934	0	0	0	0	0	0	0.00085575	0	0	0	0	0	0	0	0	0	0	0	0	0	0	0	0	0	0	0	0	0	0	0	0	0	0	0	0	0	0	0	0	0	0	0	0	0	0	0	0	0	0
ASV1935	0	0	0	0	0	0	0	0	0	0	0	0.000177608	0	0	0	0	0	0	0	0	0	0	0	0	0	0	0	0	0	0	0	0	0	0	0	0	0	0	0	0	0.000113024	0	0	0	0	0	0	0	0
ASV1936	0	0	0	0	0	0	0	0.00012917	0.000322924	0	0	0	0.00012917	0.000339071	0	0	0	0	0	0	0	0	0	0	0	0	0	0	0	0	0	0	0	0	0	0	0	0	0	0	0	0	0	0	0	0	0	0	0
ASV1937	0	0	0	0	9.69e-05	0	0	0	0	0	0.000758872	0	0	0	0	0	0	0	0	0	0	0	0	0	0	0	0	0	0	0	0	0	0	0	0	0	0	0	0	0	0	0	0	0	0	0	0	0	0
ASV1938	0	0	0	0.000161462	0	0	0	0	0	0	0	0	0	0	0	0	0	0	0.00012917	0	0	0	0	0	0	0	0	0	0	0	0	0	0	0	0	0	0	6.46e-05	0	9.69e-05	0.000177608	0	0	6.46e-05	0	0	0	0	0.000113024
ASV1939	0	9.69e-05	0	0.000581264	0	0	1.61e-05	0	0	0	0	0	0	0	0	0	8.07e-05	0	0	0	0	0	0	0	0	0	0	0	0	0	0	0	0	0	0	0	0	0	0	0	0	0	0	0	0	0	0	0	0
ASV1940	0.000516679	0	0	0	0	0	0	0	0	0	0	0	0.000209901	0	0	0	0	0	0.000145316	0	0	0	0	0	0	0	0	0	0	0	0	0	0	0	0	0	0	0	0	0	0	0	0	0	0	0	0	0	0
ASV1941	0	0	0	0	0	0	0	0	0	0.000888042	0	0	0	0	0	0	0	0	0	0	0	0	0	0	0	0	0	0	0	0	0	0	0	0	0	0	0	0	0	0	0	0	0	0	0	0	0	0	0
ASV1942	0	0	0	0	0	0	0	0	0	0	0	0	0	0	0	0	0	0	0	0	0	0	0	0	0	0	0	0	0	0	0.000775019	0	0	0	0	0	0	0	0	0	0	0	3.23e-05	0	0	0	0	0	0
ASV1943	0	0	0	0	0	0	0	0	0	0	0	0	0	0	0	0	0.000920335	0	0	0	0	0	0	0	0	0	0	0	0	0	0	0	0	0	0	0	0	0	0	0	0	0	0	0	0	0	0	0	0
ASV1944	0	0	0	0	0	0	0	0	0	0	0	0	0.00025834	0.000339071	0	0	0	0	0	0	0	0	0	0	8.07e-05	0.00012917	0	0	0	0	0	0	0	0	0	0	0	0	0	0	0	0	0	0	0	0	0	0	0
ASV1945	0	0	0	0	0	0	0	0	0	0	0	0	0	0	0	0	0	0	0	0	0.000177608	0	0.00012917	0	0	0	0	0	0	0	0	0	0	0	0	0	0	0	0	0	0	0	0	0	0	0.000403656	0	0	0
ASV1946	0	0	0	0	0	0	0	0	0	0	0	0	0	0	0	0	0	0	0	0	0	0	0	0	0	0	0	0	0	0	0	0	0	0	0	0	0	0	0	0	0	0	0.000839603	0	0	0	0	0	0
ASV1947	0	0	0	0	0	0	0	0	0	0	0	0	0	0	0	0	0	0	0	0	0	0	0	0	0	0	0	0	0	0	0	0	0	0	0	0	0	0.000532825	0	0	0	0	0	0	0	0	0	0	0
ASV1948	0	0	0	0	0	0	6.46e-05	0	0	0	0	0	0	0	0	0	0	0	0	0	0	0	0	0	0	0	0	0	0	0	6.46e-05	0	0	0	0	0.000242193	0	0	0	0	0	0	4.84e-05	0	0	0	0	0.00012917	0
ASV1949	0	0	0	0	0	0.000936481	0	0	0	0	0	0	0	0	0	0	0	0	0	0	0	0	0	0	0	0	0	0	0	0	0	0	0	0	0	0	0	0	0	0	0	0	0	0	0	0	0	0	0
ASV1950	0.000613556	0	0	0	0	0.000290632	0	0	0	0	0	0	0	0	0	0	0	0	0	0	0	0	0	0	0	0	0	0	0	0	0	0	0	0	0	0	0	0	0	0	0	0	0	0	0	0	0	0	0
ASV1951	3.23e-05	0	0	0	0	0	0	0.000516679	0	0	0.000209901	9.69e-05	0	0	0	0	0	0	0	0	0	0	0	0	0	0	0	0	0	0	0	0	0	0	0	0	0	0	0	0	0	0	0	0	0	0	0	0	0
ASV1952	0	0	0	0	0	0	0	0	0	0	0	0	0	0	0	0	0	0	0	0	0	0	0	0	0	0	0	0	0	0	0	0	0	0	0	0	0	0	0	0	0	0	0	0	0	0.000306778	0	0	0
ASV1953	0	0	0	0	0	0	0	0	0	0	0	0	0	0	0	0	0	0	0	0	0	0	0	0	0	0	0	0	0	0	0	0	0	0.000839603	0	0	0	0	0	0	0	0	0	0	0	0	0	0	0
ASV1954	0	0	0	0	0	0	0	0	0	0	0	0	0	0	0	0	0	0	0	0	0	0	0	0	0	0	0	0	0	0	0	0.000145316	0	0	0	0	0	0	0	0	0	0	0	0	0	0	0	0	0
ASV1955	0	0	0	0	0	0	0	0	0	0	0	0	0	0	0	0	0	0	0	0	0	0	0	0	8.07e-05	0	0	0.00072658	0	0	0	0	0	0	0	0	0	0	0	0	0	0	0	0	0	0	0	0	0
ASV1956	0	0	0	0	0	0	0	0	0	0	0	0	0	0	0	0	0	0	0	0	0	0	0.00085575	0	0	0	0	0	0	0	0	0	0	0	0	0	0	0	0	0	0	0	0	0	0	0	0	0	0
ASV1957	0	0	0	0	0	0	0	0	0	0	0	0	0	0	0	0	0	0	0	0	0	0	0.000355217	0	0	0	0	0	0	0	0	0	0	0	0	0	0	0	0	0	0	0	0	0	0	0	0	0	0
ASV1958	0	0	0	0	0	0	0	0	0	0	0	0	0.000242193	0	0	0	0	0	0	0	0	0	0	0	0.000565118	0	0	0	0	0	0	0	0	0	0	0	0	0	0	0	0	0	0	0	0	0	0	0	0
ASV1959	0	0	0	0	0	0	0	0	0	0	0	0	0	0	0	0	0	0	0	0	0	0	0	0	0	0	0	0	0	0	0	0.00025834	0	0	0	0	0	0	0	0	0	0	0	0	0	0	0	0.00059741	0
ASV1960	0	0	0	0	0	0	0	0	0	0	0	0	0	0	0	0	0	0	0	0	0	0	0	0	0	0	0	0	0	0	0	0	0	0.000177608	0	0	0	0	0	0	0	0	0	0	0	0.000290632	0	0	0
ASV1961	0	0	0.000177608	0	0.000177608	0.000306778	0.000145316	0	0	0	4.84e-05	0	0	0	0	0	0	0	0	0	0	0	0	0	0	0	0	0	0	0	0	0	0	0	0	0	0	0	0	0	0	0	0	0	0	0	0	0	0
ASV1962	0	0	0	0	0	0	0	0	0	0	0	0	0	0	0	0	0	0	0	0	0	0	0	0	0	0	0	0	0	0	0	0	0	0	0	0	0	0	0	0	0	0	0.000823457	0	0	0	0	0	0
ASV1963	0	0	0	0	0	0	0	0	0	0	0	0	0	0	0	0	0	0	0	0	0	0	0	0	0	0	0	0	0	0	0	0	0	0	0.000161462	0	0	0	0	0	0	0.000242193	0	8.07e-05	0	0	0	0	0
ASV1964	0	0	0	0	0	0	0	0	0	3.23e-05	0	0	0	0	3.23e-05	0	1.61e-05	0	0	0	0	0	0	0.000226047	0.000371363	3.23e-05	0	0	8.07e-05	0	0	0	0	0	0	0	0	0	0	0	0	0	0	0	0	0	0	0	0
ASV1965	0	0	0	0	0.000242193	0	0	0	0	0	0	0	0	0	0	0	0	0	0	0	0	0	0	0	0	0	0	0	0.000678141	0	0	0	0	0	0	0	0	0	0	0	0	0	0	0	0	0	0	0	0
ASV1966	0	0	0	0	0.00046824	0	0	0	0	0	0.000403656	0	0	0	0	0	0	0	0	0	0	0	0	0	0	0	0	0	0	0	0	0	0	0	0	0	0	0	0	0	0	0	0	0	0	0	0	0	0
ASV1967	0	0	0	0.000177608	0	0	0	0	0	8.07e-05	0	0	0	0	0	0	0	0	0	1.61e-05	0	0	0	0	0	0	0	4.84e-05	0	0	0	0	0	0	0	0	8.07e-05	0	3.23e-05	0	3.23e-05	9.69e-05	4.84e-05	0	0	0	0	0	0
ASV1968	0	0	0	0.000758872	0	0	0	0	0	0	0	0	0	0	0	0	0	0	0	0	0	0	0	0	0	0	0	0	0	0	0	0	0	0	0	0	0	0	0	0	0	0	0	0	0	0	0	0	0
ASV1969	3.23e-05	0	0	0	0	0.000904188	0	0	0	0	0	0	0	0	0	0	0	0	0	0	0	0	0	0	0	0	0	0	0	0	0	0	0	0	0	0	0	0	0	0	0	0	0	0	0	0	0	0	0
ASV1970	0	0	0	0	0	0	0	0	0	0	0	0	0	0	0	0	0	0	0	0	0	0	0	0	0	0	0	0	0	0	0	0.00085575	0	0	0	0	0	0	0	0	0	0	0	0	0	0	0	0	0
ASV1971	0	0	0	0	0	0	0	0	0	0	0	0	0	0	0	0	0	0	0	0	8.07e-05	0.000791165	0	0	0	0	0	0	0	0	0	0	0	0	0	0	0	0	0	0	0	0	0	0	0	0	0	0	0
ASV1972	0	0	0	0	0	0	0	0	0	0	0	0	0	0	0	0	0	0	0	0	0	0	0	0	0	0	0	0	0	0.000371363	0	0	0	0	0.000435948	0	0	0	0	0	0	0	0	0	0	0	0	0	0
ASV1973	0	0	0	0	0	0	0	0	0	0	0	0	0	0	0	0.000775019	0	0	0	0	0	0	0	0	0	0	0	0	0	0	0	0	0	0	0	0	0	0	0	0	0	0	0	0	0	0	0	0	0
ASV1974	0	0	0	0.000371363	0	0	0	0	0	0	0	0	0	0	0	0	0	0	0	0	0	0	0	0	0	0	0	0	0	0	0	0	0	0	0	0	0	0	0	0	0	0	0	0	0	0	0	0	0
ASV1975	0	0	0	0	0	0	0	0	0	0	0	0	0	0	0	0	0	0	0	0	0	0	0	0	0	0	0	0	0	0	0	6.46e-05	8.07e-05	0	0	0	0	0	0	0	0	0	0	9.69e-05	8.07e-05	0.000113024	0	0	0
ASV1976	0	0	0	0	9.69e-05	0	0	6.46e-05	0	0	0	0	0.000290632	0	0	0	0	0	0	0	0.000177608	3.23e-05	0	0	0	0	0	0	0	0	0	0	0	0	0	0	0	0	0	0	0	0	0	0	9.69e-05	0	0	0	0
ASV1977	0	0	0	0	0	0	0	0	0	0	0	0	0	0	0	0	0	0	0	0	0	0	0	0	0	0	0	0	0	0	0	0	0	0	0	0	0	0	0	0	0	0	0	0	0	0	0	0	0
ASV1978	0	0	0	0	0	0	0	0	0	0	0	0	0	0	0	0	0	0	0	0	0	0	0	0	0	0	0	0	0	0	0	0	0	0	0	0	0	0	0	0	0	0	0	0	0	0	0	0	0
ASV1979	0	0	0	0	0	0	0	0	0	0	0	0	0	0	0	0	0	0	0	0	0	0	0	0	0	0	0	0	0	0	0	0.000823457	0	0	0	0	0	0	0	0	0	0	0	0	0	0	0	0	0
ASV1980	0	0	0	0	0	0	0	0	0	0	0	0	0	0	0	0	0	0	0	0	0	0	0.000839603	0	0	0	0	0	0	0	0	0	0	0	0	0	0	0	0	0	0	0	0	0	0	0	0	0	0
ASV1981	0	0	0	0	0	0	0	0	0	0	0	0	8.07e-05	0.000322924	0	0	0	0	0	0	0	0	0	0	0	0.000339071	0	0	0	0	0	0	0	0	0	0	0	0	0	0	0	0	0	0	0	0	0	0	0
ASV1982	0	0	0	0	0	0	0	0	0	0	0	0	0	0	0	0	0	0	0	0	0	0	0	0.00025834	0	0	0	0	0	0	0	0	0	0	0	0.000274486	0	0	0	0	0	0	0	0.000113024	0	0	0	0.000177608	0
ASV1983	0	0	0	0	0	0	0	0	0	0	0	0	0	0	0	0	0	0	0	0	0	0	0	0	0	0	0	0.000629703	0	0	0	0	0	0	0.000161462	0	0	0	0	0	0	0	0	0	0	0	0	0	0
ASV1984	0	0	0	0	0	0	0	0	0	0	0	0	0	0	0	0	0	0	0	0	0	0	0	0	0	0	0	0	0	0	0	0	0	0	0	0	0	0	0	0	0	0	0.000823457	0	0	0	0	0	0
ASV1985	0	0	0	0	0	0.000613556	0	0	0	0	0	0.000306778	0	0	0	0	0	0	0	0	0	0	0	0	0	0	0	0	0	0	0	0	0	0	0	0	0	0	0	0	0	0	0	0	0	0	0	0	0
ASV1986	0	0	0	0	0	0	0	0	0	0	0	0.000871896	0	0	0	0	0	0	0	0	0	0	0	0	0	0	0	0	0	0	0	0	0	0	0	0	0	0	0	0	0	0	0	0	0	0	0	0	0
ASV1987	0	0	0.000387509	0	0	0	8.07e-05	0	0.000339071	0	0	0	0	0	0	0	0	0	0	0	0	0	0	0	0	0	0	0	0	0	0	0	0	0	0	0	0	0	0	0	0	0	0	0	0	0	0	0	0
ASV1988	0	0	0	0.00072658	0	0	0	0	0	0	0	0	0	0	0	0	0	0	0	0	0	0	0	0	0	0	0	0	0	0	0	0	0	0	0	0	0	0	0	0	0	0	0	0	0	0	0	0	0
ASV1989	0.00085575	0	0	0	0	0	0	0	0	0	0	0	0	0	0	0	0	0	0	0	0	0	0	0	0	0	0	0	0	0	0	0	0	0	0	0	0	0	0	0	0	0	0	0	0	0	0	0	0
ASV1990	0	0	0	0	0	0	0	0.000791165	0	0	3.23e-05	0	0	0	0	0	0	0	0	0	0	0	0	0	0	0	0	0	0	0	0	0	0	0	0	0	0	0	0	0	0	0	0	0	0	0	0	0	0
ASV1991	0	0	0	0	0	0	0	0.000823457	0	0	0	0	0	0	0	0	0	0	0	0	0	0	0	0	0	0	0	0	0	0	0	0	0	0	0	0	0	0	0	0	0	0	0	0	0	0	0	0	0
ASV1992	0	0	0	0	0	0	0	0	0	0	0	0	0	0	0	0	0	0	0	0	0	0	0	0	0	0	0	0	0	0	0	0	0	0	0	0	0	0	0	0	0	0	0.000775019	0	0	0	0	0	0
ASV1993	0	0	0	0	0	0	0	0	0	0	0	0	0	0	0	0	0	0	0	0	0	0	0	0	0	0	0	0	0	0	0	0	0	0	0	0	0	0	0	0	0	0	0	0	0	0	0	0	0
ASV1994	0	0	0	0	0	0	0	0	0	0	0	0	0	0	0	0	0	0	0	0	0	0	0	0	0	0	0	0	0	0	0	0	0	0	0	0	0	0	0	0	0	0	0	0	0	0	0	0	0
ASV1995	0	0	0	0	0	0	0	0	0	0	0	0	0	0	0	0	0	0	0	0	0	0	0	0	0	0	0	0	0	0	0	0	0	0	0	0	0	0	0	0	0	0	0	0	0	0	0	0	0
ASV1996	0	0	0	0	0	0	0	0	0	0	0	0	0	0	0	0	0	0	0	0.000290632	0	0	0	0	0	0	0	0	0	0	8.07e-05	0	0.000322924	0	0	8.07e-05	0	0	0	0	0	0	0	0	0	0	0	0	0
ASV1997	0	0	0	0	0	0	0	0	0	0	0	0	0	0	0	0	0.000871896	0	0	0	0	0	0	0	0	0	0	0	0	0	0	0	0	0	0	0	0	0	0	0	0	0	0	0	0	0	0	0	0
ASV1998	0	0	0	0	0	0	0	0	0	0	0	0	0.000355217	0	0	0	0	0	0	0	0	0	0	0	0.000435948	0	0	0	0	0	0	0	0	0	0	0	0	0	0	0	0	0	0	0	0	0	0	0	0
[truncated: 3,294 more rows]
[truncated: 11 more columns]
