# Supplementary material for: Responses of fungal communities at different soil depths to grazing intensity in a desert steppe
Source: PeerJ. 2025 Jan 6;13:e18791. doi: 10.7717/peerj.18791 (PMC11716020; doi:10.7717/peerj.18791)
Supplement: Supplemental Information 2 [file peerj-13-18791-s002.xlsx]

## Sheet: Sheet1
				Organic Matter	Total Nitrogen	Ammonia nitrogen	Nitrate nitrogen	Dissolve Organic Carbon	β-D-Glucosidase	N-acetyl-D-(+)-glucosamine	alkaline phosphatase		Soil Water Content
Sample	Sample name	Treatment	Depth	OM g/kg	TN g/kg	NH4-N mg/kg	NO3-N mg/kg	DOC mg/kg	βG nmol/g/h	NAG nmol/g/h	AKP nmol/g/h	pH	SWC %
1	NG1.1.1	NG	0-20	20.1574	1.03392	2.65	1.57	67.95	211.697	66.3102	209.93	7.95	1.35044
2	NG1.1.2	NG	0-20	18.7815	0.915951	2.47	1.6	60.55	195.952	43.5506	254.685	8.05	0.975293
3	NG1.1.3	NG	0-20	18.6096	1.01329	2.93	1.55	67.45	182.803	61.5282	191.989	8.64	1.38122
4	NG1.1.4	NG	0-20	18.1687	0.922549	2.45	1.04	50.9	200.05	65.15	178.688	8.3	1.77749
5	NG1.1.5	NG	0-20	18.9784	0.956835	2.53	1.02	71.1	176.496	47.8807	178.773	8.13	1.00671
6	NG1.1.6	NG	0-20	19.8186	1.03564	2.64	1.28	70.65	236.915	62.7995	184.201	8	1.28913
7	NG1.2.1	NG	20-40	18.4619	0.993842	2.69	1.54	60.3	143.621	43.5561	124.143	8.21	2.43408
8	NG1.2.2	NG	20-40	17.7142	0.936736	2.57	1.61	56.15	133.927	40.7842	146.376	8.22	2.19269
9	NG1.2.3	NG	20-40	18.0043	0.864095	2.75	1.27	55.1	120.216	25.3343	118.395	8.29	2.30871
10	NG1.2.4	NG	20-40	18.4355	0.835264	2.68	1.32	55	127.968	26.4219	114.94	8.25	2.07547
11	NG1.2.5	NG	20-40	16.1159	0.879169	2.51	1.11	68	95.1867	23.2723	98.0299	8.27	1.51324
12	NG1.2.6	NG	20-40	18.3303	0.870974	2.66	1.46	57.8	112.595	41.6537	127.064	8.16	2.58512
13	LG1.1.1	LG	0-20	21.0838	1.04429	2.54	1.01	63.85	196.806	47.7849	139.326	8.34	1.93424
14	LG1.1.2	LG	0-20	20.7754	1.07332	2.56	1.04	62	172.6	52.4127	146.637	8.14	1.8018
15	LG1.1.3	LG	0-20	21.2043	1.00178	2.34	0.98	44.61	167.756	45.2651	148.894	8.2	1.78571
16	LG1.1.4	LG	0-20	21.0396	1.00158	2.49	1.34	61.55	233.246	53.9971	124.46	8.29	1.66521
17	LG1.1.5	LG	0-20	22.6043	1.07676	2.45	1.26	60.8	170.604	49.4189	165.61	8.28	1.6116
18	LG1.1.6	LG	0-20	20.2675	1.02884	2.48	1.21	56.3	79.2713	36.3092	115.624	8.34	1.75685
19	LG1.2.1	LG	20-40	16.0926	0.729579	2.7	1.5	57.4	74.3731	19.1275	107.459	8.41	2.1645
20	LG1.2.2	LG	20-40	19.5728	0.928586	3.01	1.35	60.4	103.107	18.8467	109.76	8.15	2.2679
21	LG1.2.3	LG	20-40	16.2041	0.854035	2.73	1.32	52.9	72.6213	16.1051	85.3517	8.11	2.28341
22	LG1.2.4	LG	20-40	18.1088	0.965782	2.7	1.62	54.1	70.6894	17.0303	104.094	8.29	2.04724
23	LG1.2.5	LG	20-40	19.4901	0.911133	2.87	1.33	59.45	100.876	19.4765	98.6894	8.25	1.91912
24	LG1.2.6	LG	20-40	19.1728	0.938954	3.03	1.51	51.8	92.0309	17.7432	108.602	8.32	2.17549
25	MG1.1.1	MG	0-20	17.8377	0.952988	2.96	1.37	49.34	73.5359	38.9104	81.745	8.23	1.86495
26	MG1.1.2	MG	0-20	19.7404	0.910492	2.71	1.26	59	51.858	30.3912	89.8894	8.31	2.19846
27	MG1.1.3	MG	0-20	17.9194	0.974197	2.83	2.59	48.955	85.4089	36.228	81.1705	8.23	2.133
28	MG1.1.4	MG	0-20	20.7139	1.1011	2.42	1.2	49.485	89.0891	37.5809	136.199	8.36	1.86976
29	MG1.1.5	MG	0-20	18.2199	0.985312	2.56	1.39	47.71	92.6108	35.8121	58.6885	8.24	1.89487
30	MG1.1.6	MG	0-20	19.1982	0.955573	2.56	1.21	55.25	75.3421	51.5293	74.0406	8.3	1.84332
31	MG1.2.1	MG	20-40	17.7704	0.920619	2.86	1.8	46.715	98.8772	22.9372	135.354	8.22	2.59067
32	MG1.2.2	MG	20-40	17.245	0.876599	2.73	1.69	41.345	80.4813	29.7236	146.119	8.26	2.72969
33	MG1.2.3	MG	20-40	19.117	0.8117	2.98	4.22	59.55	67.8815	25.9751	137.914	8.11	2.50991
34	MG1.2.4	MG	20-40	18.8455	0.930966	3.05	1.87	62.3	64.0987	13.2715	117.311	8.41	2.44514
35	MG1.2.5	MG	20-40	19.1287	0.934171	2.67	1.68	56.8	53.1002	13.5219	135.75	8.25	2.48042
36	MG1.2.6	MG	20-40	18.1227	0.839928	2.75	1.75	56.65	77.8501	12.4685	112.144	8.37	1.85874
37	HG1.1.1	HG	0-20	18.0704	1.09921	2.5	1.21	68.4	105.467	30.6849	152.125	8.35	1.75695
38	HG1.1.2	HG	0-20	19.4162	0.989594	2.65	1.58	69.25	113.74	34.7126	172.874	8.22	1.29278
39	HG1.1.3	HG	0-20	18.9165	0.993634	2.46	1.34	67.4	135.171	49.34	205.89	8.08	1.50263
40	HG1.1.4	HG	0-20	18.8284	0.977613	2.41	1.29	81.35	104.525	34.6639	163.107	8.29	1.37981
41	HG1.1.5	HG	0-20	17.1464	0.973918	2.72	1.54	84.8	101.842	29.9295	218.775	8.31	1.99229
42	HG1.1.6	HG	0-20	19.1973	0.931818	2.87	5.59	62.15	85.2554	27.3683	143.131	8.25	1.03359
43	HG1.2.1	HG	20-40	19.0629	0.974626	2.17	4.44	56.35	90.8346	13.2994	50.2344	8.45	2.39558
44	HG1.2.2	HG	20-40	19.9987	0.992574	2.98	6.42	54.2	93.4121	14.1648	70.6245	8.28	2.79766
45	HG1.2.3	HG	20-40	19.7744	1.05828	2.64	1.39	58.05	94.2623	15.0606	59.6561	8.35	2.47633
46	HG1.2.4	HG	20-40	20.6479	1.00707	2.6	1.35	49.635	94.7897	24.7169	83.8553	8.34	2.0595
47	HG1.2.5	HG	20-40	20.5803	1.0022	2.83	1.38	65.3	79.9597	18.2028	93.9761	8.4	2.30415
48	HG1.2.6	HG	20-40	20.0867	0.919081	2.9	8.2	68.05	97.6934	13.7482	58.1927	8.33	2.00429
49	OG1.1.1	OG	0-20	18.7948	0.988926	2.66	1.39	65.75	63.7767	14.4937	146.007	8.2	1.23297
50	OG1.1.2	OG	0-20	17.4191	0.79843	2.63	13.98	65.45	69.9701	14.3767	113.517	8.24	1.45754
51	OG1.1.3	OG	0-20	18.2059	0.891205	2.68	10.44	59.9	62.213	16.1796	150.687	8.29	1.3663
52	OG1.1.4	OG	0-20	16.4844	0.891652	2.32	1.34	79.7	69.8238	14.8271	134.207	8.49	1.11043
53	OG1.1.5	OG	0-20	19.2285	0.872681	2.44	2.47	57.25	86.9721	12.8131	120.73	8.35	2.0936
54	OG1.1.6	OG	0-20	17.7452	0.9357	3.61	3.17	57.35	77.4989	15.4484	163.95	8.23	1.18265
55	OG1.2.1	OG	20-40	19.3661	1.01164	2.8	1.56	68.05	122.47	15.8765	80.6376	8.25	1.79402
56	OG1.2.2	OG	20-40	19.817	0.927972	2.45	14.54	58.5	70.1098	9.08467	51.937	8.16	1.66453
57	OG1.2.3	OG	20-40	18.4294	0.950307	3.34	16	51.25	57.2579	11.6955	61.3723	8.1	2.10191
58	OG1.2.4	OG	20-40	17.381	0.882028	2.69	3.73	51.2	59.2299	11.0595	73.3338	8.3	2.53243
59	OG1.2.5	OG	20-40	18.4956	0.97788	2.59	1.43	64.75	82.953	19.3584	56.3374	8.39	1.22026
60	OG1.2.6	OG	20-40	17.6636	0.952589	3.14	9.96	52.4	54.6115	12.7265	75.9635	8.24	2.38394
